# Supplementary material for: The Brain Origin of Neonatal Microglia Determines the Content of Exosomes and Biological Function
Source: Preprints.org preprint supplement (doi:10.20944/preprints201907.0102.v1), 2019-07-08
Supplement: Supplementary file 1 [file supplementary]

**
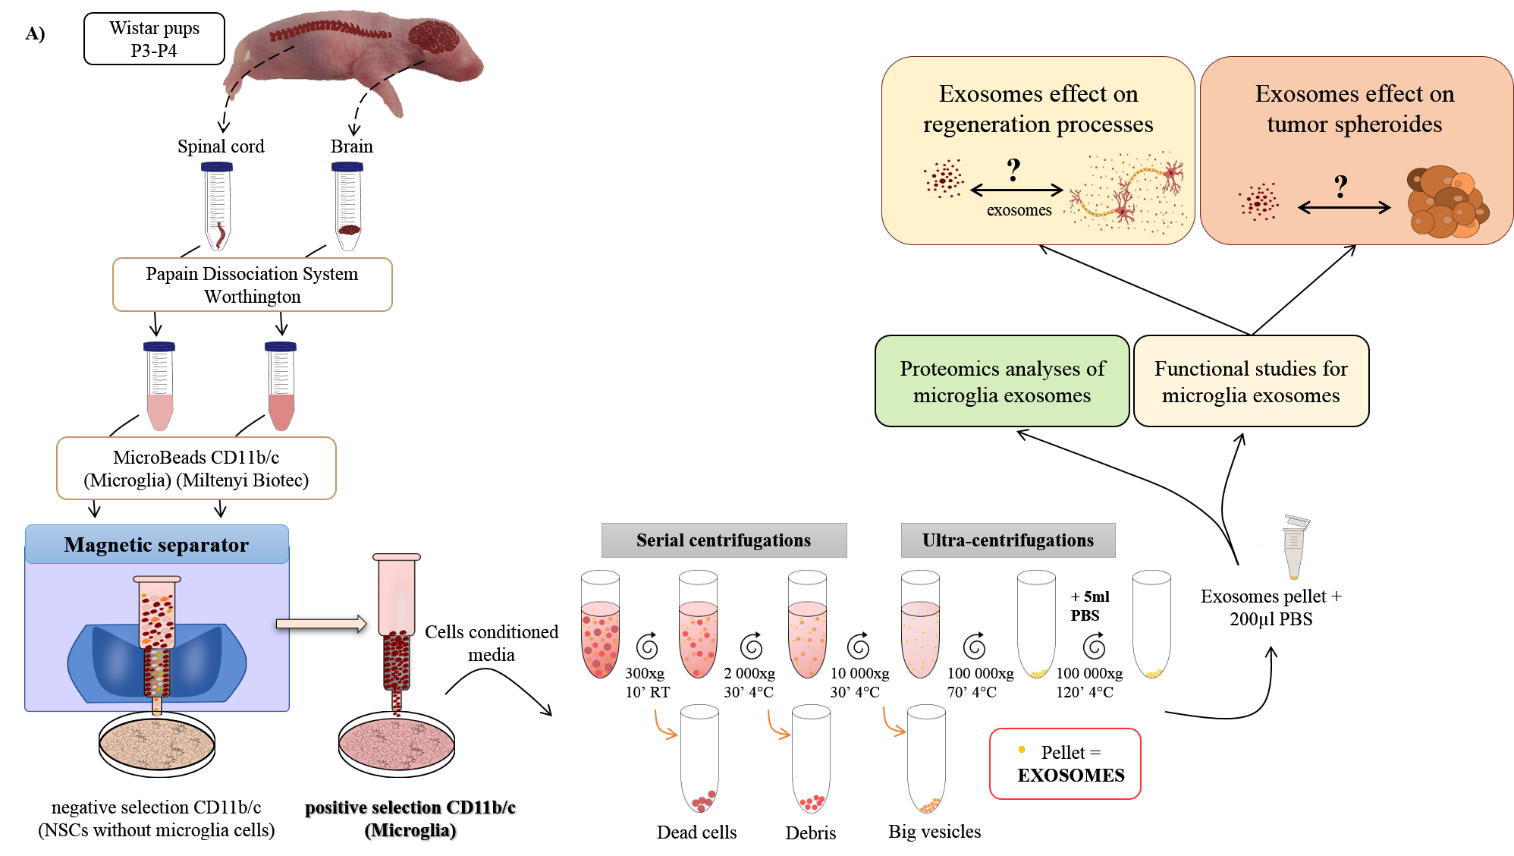
**

**
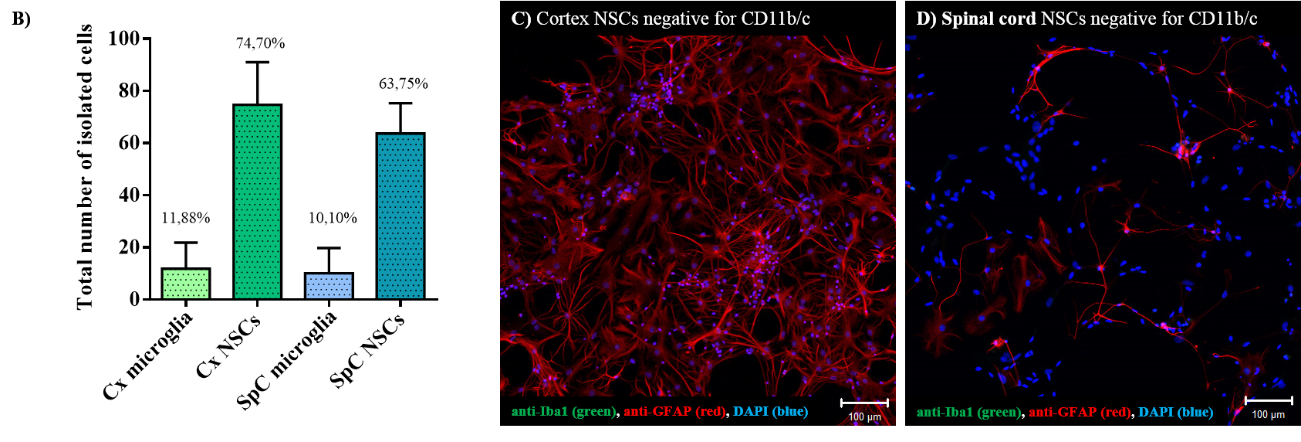
**

**Supplementary data 1. A)** Experiment workflow: microglia cells and exosomes isolation. **B)** Number of isolated microglia cells from different tissue region from 10 rat pups P3/P4. **C)** and **D)** Immunostaining using anti-Iba1 antibody (green), marker for microglia cells, anti-GFAP antibody (red), marker for astrocytes and DAPI (blue) stain for cell nucleus. Scale bars: 100 µm.
