# Supplementary material for: The Brain Origin of Neonatal Microglia Determines the Content of Exosomes and Biological Function
Source: Preprints.org preprint supplement (doi:10.20944/preprints201907.0102.v1), 2019-07-08
Supplement: Supplementary file 2 [file Supp. data Legend.docx]

**Supplementary figures Legends**

**Supp. Data 1**

Number of isolated microglia cells from different tissue region from 10 rat pups P3/P4. B) and C) Immunostaining using anti-Iba1 antibody (green), marker for microglia cells, anti-GFAP antibody (red), marker for astrocytes and DAPI (blue) stain for cell nucleus. Scale bars: 100 µm.

**Supp. Data 2**

LFQ of the proteins identified after shot gun proteomic from cortex or spinal cord treated or not with LPS

**Supp. Data 3**

Common pathways between spinal cord microglia under control and LPS treatment

**Supp. Data 4**

A)NanoSight analyses for exosomes of cortex and spinal cord microglia control and treated with 500ng/ml LPS. (B) Statistical analyses of NanoSight results of concentration, mean and mode analyses.

**Supp. Data 5**

Cortex cord Microglia exosomes proteins identified after Shot Gun proteomic

**Supp. Data 6**

Lps treated Cortex Microglia exosomes proteins identified after Shot Gun proteomic

**Supp. Data 7**

Spinal cord Microglia exosomes proteins identified after Shot Gun proteomic

**Supp. Data 8**

Spinal cord LPS treated Microglia exosomes proteins identified after Shot Gun proteomic

**Supp. Data 9**

Specific protein identified in cortex and spinal cord microglia exsosomes. (http://www.uniprot.org/mapping/)

**Supp. Data 10**

List of exosomes proteins identified from different sources.

**Supp. Data 11**

List of protein identified and found in Exocarta database

**Supp. Data 12**

Enriched pathways rom the significantly abundant proteins present in each cluster 1

**Supp. Data 13**

Enriched pathways rom the significantly abundant proteins present in each cluster 2

**Supp. Data 14**

Enriched pathways rom the significantly abundant proteins present in each cluster 3

**Supp. Data 15**

Spatio-temporal expression of developmental microglia gene markers from Brain Atlas (<http://developingmouse.brain-map.org/>)

**Supp. Figure 1**

Experiment workflow: microglia cells and exosomes isolation.

**Supp. Data 2**
