# Supplementary material for: The Brain Origin of Neonatal Microglia Determines the Content of Exosomes and Biological Function
Source: Preprints.org preprint supplement (doi:10.20944/preprints201907.0102.v1), 2019-07-08
Supplement: Supplementary file 4 [file Supplementary data 10.docx]

**Supplementary data 10.** List of exosomes proteins identified from different sources.

| **Exosomes proteins of cortex microglia** | | **Exosomes proteins of spinal cord microglia** | |
| --- | --- | --- | --- |
| Untreated cells | Cells treated 24h with LPS | Untreated cells | Cells treated 24h with LPS |
| Mug2, Clstn1, Ltdhb, Igfbp2, Oaf, Actn4, Pdla3, P4hb, PlOd3, Gdl2,  CspG4, Bcan, ApoE, Sparcl1, Chadl  Cd9, Igfbp2, Hyou1, Ldhb, LdhA, LdhC, Acly, Calu | Sept1, Ppp1c1a, Sept2, Pafah1b1, Actr1a, Atp1a1, AnxA1, Ezr, Hist1h1b, Dnm2, St13, Hsp90ab1, Hspd1, Dars, Cct4, Cct3, Cct2, Eef1g, Tcp1, Rpl13a, Eif3c, Eif3b, Psmd2, Psmc5, Psmb2, Psmd6, and Psmd13 | Krt19, Arsb, Acta2, Glo1, Pla1Afrp1, Serpinb1, Cycs, Fbln5, Fabp3, Ahsg, ATP6ap2, Rbmx | TNFα, Gmfb, Mbp, Fst, Sod3 |
| Common proteins | | Common proteins | |
| Olfml3, Hexb, Fabp5, Cspg4, Fam3, Lgals1,  Gpnmb, Gpx1, Vim, Fabp5 and Spp1 | | Spp1, Bgn, Cndp2, Aebp1, Sod3, Hltra1, Lgals1, Lgals3bp,  Cfh, mrc2, C4a, Lgal3bp, Lgals1, C1S, and Cfhr1,  Spp1, Spon1, Sned1, Srpx | |
