# Supplementary material for: The Brain Origin of Neonatal Microglia Determines the Content of Exosomes and Biological Function
Source: Preprints.org preprint supplement (doi:10.20944/preprints201907.0102.v1), 2019-07-08
Supplement: Supplementary file 5 [file Supplementary data 11.xlsx]

## Sheet: Feuil1
Cortex	Exorcorta	Transcriptomic (whole µglia)		Spinal Cord	Exorcorta	Transcriptomic (whole µglia)
		Adult	Neonatal			Adult	Neonatal
A1i3
A2m	x			A2m	x
Aco1				Acp2
Acta2				Acta2
Actb	X			Actb	X
Actn1				Actn1
Actn4	x			Actn4	x
Actr2				Actr3
Actr3				Ada
Adm				Akr1a1
Aebp1				Alb	x
Agrn				Aldoa	x
Ahcy	x			Anxa2	x
Akr1a1				Apob
Akr1b1				Apod
Alb	x			Apoe
Aldoa	x			Arf3
Aldoc				Arhgdia
Amy2				Arpc2
Anp32a				Asah1
Anxa2	X			Atp5b	X
Anxa3				B2m
Anxa5	x			Bgn
Ap1b1				Blmh
Ap2a2				C1qa
Ap2m1				C1qb
Apob				C1qc
Apod				C1s
Apoe				C3
App				C4a
Arf3				Calm1
Arhgdia				Calr
Arpc1b				Cap1
Arpc2				Capg
Arpc5				Cat
Asah1				Ccl2
Atic				Ccl7
Atp5b				Cd14
Atp6ap1				Cd81	x
Atp6v1c1				Cfl1	x		x
B2m				Chi3l1
Bgn				Ckb
Blmh				Cltc	x
C1qa				Clu
C1qb				Cndp2
C1qc				Col1a1
C1s				Col1a2
C3				Col3a1
C4a				Comp
Calm1				Cotl1
Calr				Cs
Cand1				Cst3
Cap1				Cstb
Capg				Ctsb
Capza1				Ctsc
Capza2				Ctsd
Capzb				Ctsl1
Ccl2				Ctsz
Ccl7				Cxcl1
Cct2				Cxcl2
Cct3	x			Cxcl3
Cct4	x			Cycs
Cd14				Ddt
Cd81	x			Dpp3
Cd9	X			Dpp7
Cdc42	x			Dpysl2		x	x
Cfd				Eef1a1	x
Cfl1	x		x	Eef2	x
Ckb				Eif4a2
Clic1	x			Eno1	x
Cltc	x			Eno-2
Clu				Eno3
Cndp1				Tpl1
Cndp2				Mor9c2
Col1a1				F2
Col1a2				Fabp3
Col3a1				Fabp4
Comp				Fam3c
Copb1				Flnc
Coro1a				Fn1
Cotl1				Fstl1
Cp		x	x	Fth1
Cpb2				Ftl	x
Cs				G6pd
Ctsb				Galns
Ctsc				Gapdh
Ctsd				Gclc
Ctsh				Gda
Ctsl1				Gdi1	x
Ctsz				Gdi2
Cxcl1				Glo1
Cxcl2				Glod4
Cxcl3				Glud1
Cycs				Glul
Dpp7				Gnb2l1	x
Dpysl2		x	x	Got1
Dstn				Got2
Dync1h1				Gpi
Eef1a1	x			Gpnmb			x
Eef1g				Gpx1			x
Eef2	x			Grn
Eif3b				Gsn
Eif4a2				Gsr
Emr1				Gstp1
Eno1	x			Gusb
Eno-2				H3f3b
Eno3				Hba2
Tpl1				Hbb
Mor9c2				Hexa		x
F2				Hist2h4	x
Fabp4				Hk3
Fabp5			x	Hnrnpa2b1
Fam3c				Hpx
Fh				Hsp90aa1	x
Flnc				Hsp90ab1	x
Fn1				Hsp90b1
Fstl1				Hspa5	x
Fth1				Hspa8	x
Ftl	x			Il1rn
Fuca1				Il6
G6pd				Itih3
Galns				Jup
Gapdh				Krt1
Gas6				Krt10
Gbp2				Krt13
Gda				Krt14
Gdi1	x			Krt17
Gdi2				Krt2
Glo1				Krt24
Glod4				Krt4
Glud1				Krt42
Glul				Krt5
Gnb2l1	x			Krt75
Got1				Krt77
Got2				Krt8
Gpi				Krt80
Gpnmb			x	Lap3
Gpx1			x	Lbp
Grn				Lcn2
Gsn				Ldhb	x
Gsta3				Lgals3
Gsta4				Lgals3bp	x
Gstp1				Lgmn
Gusb				Lmna
Gyg1				Lta4h
H3f3b				Lum
Hba2				Lyz2
Hbb				Marcks
Hexa		x		Mdh1
Hist2h4	x			Mdh2
Hk3				Mgp
Hmgb2				Mmp2
Hmox1				Mmp9
Hnrnpa1				Msn	x
Hnrnpa2b1				Mvp	x
Hprt1				Myh9l1	x
Hpx				Ncl
Hsp90aa1	x			Neu1
Hsp90ab1	x			Nid1
Hsp90b1				Nid2
Hspa4				Nme1
Hspa5	x			Nme2
Hspa8	x			Nucb1
Htra1				P4hb
Idh1				Park7
Igfals			x	Pcolce
Il1rn				Pdcd6ip	x
Il6				Pdia3
Itih3				Pdia4
Jup				Pebp1
Kpnb1				Pepd
Krt1				Pfn1	x
Krt10				Pgam1
Krt14				Pgk1	x
Krt15				Pgm1
Krt17				Pkm	x
Krt2				Plbd2
Krt24				Pld3
Krt42				Plg
Krt5				Pls3
Krt72				Pnp
Krt75				Ppia	x
Krt77				Ppib
Krt8				Prdx1
Lamb2				Prdx2	x
Lamp1	x			Prdx5
Lap3				Prdx6
Lcn2				Psap
Ldhb				Psma1
Lgals1		x		Psma2
Lgals3				Psma3
Lgals3bp	x			Psma4
Lgmn				Psma5
Lmna				Psma6
Lpl				Psma7
Lta4h				Psmb1
Lum				Psmb10
Lyz2				Psmb2
Marcks				Psmb3
Mdh1				Psmb4
Mdh2				Psmb5
Me1				Psmb6
Mmp2				Psmb7
Mmp9				Psmb8
Msn	x			Psmb9
Mvp	x			Psme1
Myh10				Ptma
Myh9l1	x			Pzp
Naga				Rbmx
Ncan				RGD1562690
Ncl				Rps27a
Nid1				Rps4
Nid2				S100a11
Nme1				Sdc4
Nme2				Sdcbp	x
Nov				Serpine1
Npl				Serping1
Nqo1				Set
Nucb1				Smpdl3a
Nucb2				Sod1
P4hb				Sod2
Pcolce				Sparc
Pdcd6ip	x			Spp1			x
Pdia3				Tagln
Pdia6				Tagln2
Pebp1				Taldo1
Pepd				Tcn2
Pfkl				Tf
Pfn1	x			Tfrc	x
Pgam1				Timp1
Pgk1	x			Timp2
Pgm1				Tkt	x
Pkm	x			Tmsb4x
Plbd2				Tpm3
Plg				Tpm4
Plod1				Tpt1	x
Pls3				Tuba1b	x
Pnp				Tuba4a	x
Ppia	x			Tubb2a
Ppib				Txn1
Prdx1	x			Txnrd1
Prdx2	x			Vat1
Prdx5				Vcan
Prdx6				Vcl
Psap				Vcp	x
Psma1				Vim			x
Psma2				Wdr1
Psma3				Ywhab	x
Psma4				Ywhae	x
Psma5				Ywhag	x
Psma6				Ywhah	x
Psma7				Ywhaq	x
Psmb1				Ywhaz	x
Psmb10
Psmb2
Psmb3
Psmb4
Psmb5
Psmb6
Psmb7
Psmb8
Psmb9
Psmc2
Psmc3
Psmd2
Psme1
Ptma
Pygb
Pygl
Pzp
Qsox1
Rab11b
Rab15
RGD1562690
Rhoa	x
Rplp0
Rps18
Rps25
Rps27a
Rps3
Rps4
Rpsa
S100a11
S100a4
S100a6
Scpep1
Sdc4
Sdcbp	x
Serpinb2
Serpind1
Serpine1
Serpine2
Serping1
Set
Smpdl3a
Sod1
Sod2
Sparc
Spp1			x
Tagln2
Taldo1
Tcn2
Tcp1	x
Tf
Tfrc	x
Thbs4
Timp1
Timp2
Tkt	x
Tmsb4x
Tnf
Tnfrsf1b
Tpm3
Tpm4
Tpt1
Tuba1c	x
Tuba4a	x
Tubb4b
Tubb5
Txn1
Txnrd1
Uba1	x
Vat1
Vcan
Vcl
Vcp	x
Vim			x
Wdr1
Ybx1
Ywhab	x
Ywhae	x
Ywhag	x
Ywhah	x
Ywhaq	x
Ywhaz	x
