# Supplementary material for: The Brain Origin of Neonatal Microglia Determines the Content of Exosomes and Biological Function
Source: Preprints.org preprint supplement (doi:10.20944/preprints201907.0102.v1), 2019-07-08
Supplement: Supplementary file 6 [file Supplementary data 12.xlsx]

## Sheet: Feuil2
Protein IDs	Majority protein IDs	Protein names	Gene names	Gene name	GOBP name	GOCC name	GOMF name	KEGG name
A0A096P6L8;P04937;P04937-3;P04937-4	A0A096P6L8;P04937;P04937-3;P04937-4	Fibronectin;Anastellin	Fn1	Fn1	biological adhesion;cell adhesion;extracellular matrix organization;extracellular structure organization	basement membrane;extracellular matrix;extracellular matrix part;extracellular region;extracellular space;proteinaceous extracellular matrix	carbohydrate binding;cation binding;extracellular matrix structural constituent;heparin binding;ion binding;metal ion binding;pattern binding;polysaccharide binding
F1LPU2;A0A0G2JUE3;P0C6B8	F1LPU2;A0A0G2JUE3;P0C6B8	Sushi, von Willebrand factor type A, EGF and pentraxin domain-containing protein 1	Svep1	Svep1	biological adhesion;cell adhesion	extracellular region	cation binding;ion binding;metal ion binding
F1LPD0;A0A0G2JV12	F1LPD0;A0A0G2JV12		Col15a1	Col15a1	biological adhesion;cell adhesion	basement membrane;extracellular matrix part;extracellular space
M0RB00;A0A0G2JW12	M0RB00;A0A0G2JW12		C4a	C4a		extracellular space
A0A0G2JWB6;A0A0G2KAH2	A0A0G2JWB6;A0A0G2KAH2
A0A0G2JX64;P04692-6;Q91XN6;A0A0G2K7F7;P04692-3;P04692	A0A0G2JX64;P04692-6;Q91XN6;A0A0G2K7F7;P04692-3;P04692	Tropomyosin alpha-1 chain	Tpm1	Tpm1
A0A0G2K1L0	A0A0G2K1L0
A0A0G2KAI7;Q5XI84;A0A0G2K2R5	A0A0G2KAI7;Q5XI84;A0A0G2K2R5		Efemp2	Efemp2			cation binding;ion binding;metal ion binding
A0A0G2KAJ7;P70560-2;P70560	A0A0G2KAJ7			Col12a1	biological adhesion;cell adhesion	collagen;extracellular matrix part	extracellular matrix structural constituent
F1LS40;A0A0G2KAN1;A0A0G2K5E8;P02466	F1LS40;A0A0G2KAN1;A0A0G2K5E8;P02466	Collagen alpha-2(I) chain	Col1a2	Col1a2	extracellular matrix organization;extracellular structure organization	collagen;extracellular matrix;extracellular matrix part;extracellular region;extracellular space;fibrillar collagen;proteinaceous extracellular matrix	cation binding;extracellular matrix structural constituent;ion binding;metal ion binding	Amoebiasis;ECM-receptor interaction;Focal adhesion
A0A0H2UHL3;A2RUV9	A0A0H2UHL3;A2RUV9	Adipocyte enhancer-binding protein 1	Aebp1	Aebp1		extracellular matrix;extracellular space	cation binding;ion binding;metal ion binding
G3V8H7;B0BNI5	G3V8H7;B0BNI5	Olfactomedin-like protein 3	Olfml3	Olfml3		extracellular region
B1WC21	B1WC21	Fibulin-1	Fbln1	Fbln1	extracellular matrix organization;extracellular structure organization	extracellular matrix;proteinaceous extracellular matrix	cation binding;ion binding;metal ion binding
D3Z9E1	D3Z9E1		Emilin1	Emilin1	extracellular matrix organization;extracellular structure organization	collagen;extracellular matrix;extracellular matrix part;proteinaceous extracellular matrix	extracellular matrix structural constituent
D3ZAF5	D3ZAF5		Postn	Postn	biological adhesion;cell adhesion;extracellular matrix organization;extracellular structure organization	extracellular matrix;extracellular space;proteinaceous extracellular matrix	carbohydrate binding;heparin binding;pattern binding;polysaccharide binding
D3ZQ25	D3ZQ25	Fibulin-1	Fbln1	Fbln1	extracellular matrix organization;extracellular structure organization	basement membrane;extracellular matrix part;extracellular space	cation binding;ion binding;metal ion binding
D3ZQN7	D3ZQN7		Lamb1	Lamb1	biological adhesion;cell adhesion	extracellular matrix;extracellular matrix part;extracellular space	extracellular matrix structural constituent
D4A1S0;G3V7L3;Q6P6T1	D4A1S0;G3V7L3;Q6P6T1	Complement C1s subcomponent;Complement C1s subcomponent heavy chain;Complement C1s subcomponent light chain	C1s	C1s		extracellular region	cation binding;ion binding;metal ion binding
D4A2G6	D4A2G6		Thbs2	Thbs2	biological adhesion;cell adhesion	basement membrane;extracellular matrix part	carbohydrate binding;cation binding;heparin binding;ion binding;metal ion binding;pattern binding;polysaccharide binding	ECM-receptor interaction;Focal adhesion
D4AC70	D4AC70		Col8a1	Col8a1		collagen;extracellular matrix;extracellular matrix part
F1LM84;P08460	F1LM84		Nid1	Nid1	biological adhesion;cell adhesion;extracellular matrix organization;extracellular structure organization	extracellular matrix part	cation binding;ion binding;metal ion binding
F1LMA7;Q4TU93	F1LMA7;Q4TU93	C-type mannose receptor 2	Mrc2	Mrc2			carbohydrate binding
F1LNH3	F1LNH3		Col6a2	Col6a2		collagen;extracellular matrix;extracellular matrix part;extracellular region;extracellular space		ECM-receptor interaction;Focal adhesion
F1LQ00	F1LQ00		Col5a2	Col5a2	extracellular matrix organization;extracellular structure organization	collagen;extracellular matrix part;fibrillar collagen	extracellular matrix structural constituent
F1LTF8	F1LTF8		Lama4	Lama4	biological adhesion;cell adhesion	extracellular matrix part
F1LTJ5	F1LTJ5		Hspg2	Hspg2
F1M614	F1M614		Lama2	Lama2	biological adhesion;cell adhesion;extracellular matrix organization;extracellular structure organization	extracellular matrix part
F1M6Q3	F1M6Q3		Col4a2	Col4a2		collagen;extracellular matrix part;extracellular region	extracellular matrix structural constituent
Q5XJW6;F1M983;G3V9R2;Q5I0M3	Q5XJW6;F1M983;G3V9R2		Cfh	Cfh;Cfhr1		extracellular space
F1MAA7	F1MAA7		Lamc1	Lamc1	biological adhesion;cell adhesion;extracellular matrix organization;extracellular structure organization	extracellular matrix;extracellular matrix part;proteinaceous extracellular matrix	extracellular matrix structural constituent	Amoebiasis;ECM-receptor interaction;Focal adhesion
F8WG88;Q62632	F8WG88;Q62632	Follistatin-related protein 1	Fstl1	Fstl1		extracellular region;extracellular space	carbohydrate binding;cation binding;heparin binding;ion binding;metal ion binding;pattern binding;polysaccharide binding
G3V6X1	G3V6X1		Fbln2	Fbln2		extracellular matrix	cation binding;ion binding;metal ion binding
G3V763;Q9JI03	G3V763;Q9JI03	Collagen alpha-1(V) chain	Col5a1	Col5a1	biological adhesion;cell adhesion;extracellular matrix organization;extracellular structure organization	basement membrane;collagen;extracellular matrix part;fibrillar collagen	carbohydrate binding;extracellular matrix structural constituent;heparin binding;pattern binding;polysaccharide binding	Amoebiasis;ECM-receptor interaction;Focal adhesion
G3V7S1;Q6WRH9	G3V7S1;Q6WRH9	Immunoglobulin superfamily member 10	Igsf10	Igsf10		extracellular region
G3V9M6	G3V9M6		Fbn1	Fbn1		basement membrane;extracellular matrix;extracellular matrix part;extracellular region;extracellular space	cation binding;extracellular matrix structural constituent;ion binding;metal ion binding
M0R6K0;P15800;Q5M7W9	M0R6K0;P15800;Q5M7W9	Laminin subunit beta-2	Lamb2	Lamb2	biological adhesion;cell adhesion;extracellular matrix organization;extracellular structure organization	basement membrane;extracellular matrix part		Amoebiasis;ECM-receptor interaction;Focal adhesion
O08628;Q5RJN2	O08628;Q5RJN2	Procollagen C-endopeptidase enhancer 1	Pcolce	Pcolce		extracellular matrix;extracellular space	carbohydrate binding;heparin binding;pattern binding;polysaccharide binding
O70513	O70513	Galectin-3-binding protein	Lgals3bp	Lgals3bp	biological adhesion;cell adhesion	extracellular matrix;proteinaceous extracellular matrix
P02454	P02454	Collagen alpha-1(I) chain	Col1a1	Col1a1	extracellular matrix organization;extracellular structure organization	collagen;extracellular matrix part;extracellular region;extracellular space;fibrillar collagen	cation binding;extracellular matrix structural constituent;ion binding;metal ion binding	Amoebiasis;ECM-receptor interaction;Focal adhesion
P02688-5;P02688-2;P02688;P02688-4;P02688-3;Q5XFW1	P02688-5;P02688-2;P02688;P02688-4;P02688-3;Q5XFW1	Myelin basic protein	Mbp	Mbp
P08721	P08721	Osteopontin	Spp1	Spp1	biological adhesion;cell adhesion	extracellular space		ECM-receptor interaction;Focal adhesion
P11762	P11762	Galectin-1	Lgals1	Lgals1		extracellular matrix;extracellular space;proteinaceous extracellular matrix	carbohydrate binding
P13941	P13941	Collagen alpha-1(III) chain	Col3a1	Col3a1	biological adhesion;cell adhesion;extracellular matrix organization;extracellular structure organization	collagen;extracellular matrix;extracellular matrix part;extracellular space;fibrillar collagen	cation binding;extracellular matrix structural constituent;ion binding;metal ion binding	Amoebiasis;ECM-receptor interaction;Focal adhesion
P20909-6;P20909-4;P20909-5;P20909-3;P20909;P20909-2	P20909-6;P20909-4;P20909-5;P20909-3;P20909;P20909-2	Collagen alpha-1(XI) chain	Col11a1	Col11a1	biological adhesion;cell adhesion;extracellular matrix organization;extracellular structure organization	collagen;extracellular matrix;extracellular matrix part;proteinaceous extracellular matrix	cation binding;extracellular matrix structural constituent;ion binding;metal ion binding	Amoebiasis;ECM-receptor interaction;Focal adhesion
P33436;E9PSM5	P33436;E9PSM5	72 kDa type IV collagenase;PEX	Mmp2	Mmp2		extracellular matrix;extracellular space;proteinaceous extracellular matrix	cation binding;ion binding;metal ion binding
P47853	P47853	Biglycan	Bgn	Bgn		extracellular matrix;proteinaceous extracellular matrix	carbohydrate binding;pattern binding;polysaccharide binding
Q08420	Q08420	Extracellular superoxide dismutase [Cu-Zn]	Sod3	Sod3		extracellular matrix;extracellular space	cation binding;ion binding;metal ion binding
Q3B7D6;P35446	Q3B7D6;P35446	Spondin-1	Spon1	Spon1	biological adhesion;cell adhesion	extracellular matrix;extracellular space;proteinaceous extracellular matrix
Q4V8N0;Q9EQT5	Q4V8N0;Q9EQT5	Tubulointerstitial nephritis antigen-like	Tinagl1	Tinagl1	biological adhesion;cell adhesion	extracellular matrix;extracellular space	carbohydrate binding;pattern binding;polysaccharide binding
Q5FWS5	Q5FWS5		Loxl1	Loxl1		basement membrane;extracellular matrix;extracellular matrix part;proteinaceous extracellular matrix	cation binding;ion binding;metal ion binding
Q5U2V1;A0A096MJW1	Q5U2V1;A0A096MJW1		Fkbp10	Fkbp10			cation binding;ion binding;metal ion binding
Q5ZQU0;D3ZNR4	Q5ZQU0;D3ZNR4	Sushi, nidogen and EGF-like domain-containing protein 1	Sned1	Sned1	biological adhesion;cell adhesion		cation binding;ion binding;metal ion binding
Q63769-2;Q63769	Q63769-2;Q63769	Sushi repeat-containing protein SRPX	Srpx	Srpx
Q6Q0N1	Q6Q0N1	Cytosolic non-specific dipeptidase	Cndp2	Cndp2			cation binding;ion binding;metal ion binding
Q6QD51	Q6QD51	Coiled-coil domain-containing protein 80	Ccdc80	Ccdc80	extracellular matrix organization;extracellular structure organization	basement membrane;extracellular matrix;extracellular matrix part;proteinaceous extracellular matrix	carbohydrate binding;heparin binding;pattern binding;polysaccharide binding
Q9QZK5	Q9QZK5	Serine protease HTRA1	Htra1	Htra1		extracellular matrix

## Sheet: Feuil1
Cluster ID	Type	Name	P value	Enrichment	Total	In cluster	Cluster size	Ben. Ho. FDR
225	GOCC name	extracellular matrix part	1.1948e-13	3.5969	28	24	56	1.6569e-11
225	GOCC name	extracellular matrix	2.0753e-11	3.0856	34	25	56	1.2333e-09
225	GOCC name	collagen	6.2446e-08	4.1964	11	11	56	1.9983e-06
225	GOBP name	extracellular structure organization	8.9569e-09	3.5338	19	16	56	1.056e-05
225	GOBP name	extracellular matrix organization	8.9569e-09	3.5338	19	16	56	2.112e-05
225	GOMF name	extracellular matrix structural constituent	1.6878e-07	3.6369	15	13	56	4.0593e-05
225	GOCC name	proteinaceous extracellular matrix	1.9225e-06	3.0921	19	14	56	5.3316e-05
225	GOCC name	basement membrane	1.1633e-05	3.7768	10	9	56	0.00028466
225	GOBP name	cell adhesion	1.629e-06	2.4685	34	20	56	0.00064019
225	GOCC name	extracellular region part	3.3864e-05	1.3788	140	46	56	0.00074145
225	GOBP name	biological adhesion	1.629e-06	2.4685	34	20	56	0.00076822
225	GOMF name	metal ion binding	1.6734e-05	2.0982	44	22	56	0.00080488
225	GOMF name	ion binding	1.6734e-05	2.0982	44	22	56	0.00089432
225	GOCC name	extracellular space	4.5898e-05	2.0494	43	21	56	0.00095467
225	GOMF name	cation binding	1.6734e-05	2.0982	44	22	56	0.0010061
225	GOCC name	extracellular region	8.7874e-05	2.885	16	11	56	0.0017407
225	GOBP name	regulation of cell adhesion	1.8152e-05	2.8712	19	13	56	0.0047557
225	GOMF name	polysaccharide binding	0.00015998	3.1473	12	9	56	0.0048094
225	GOMF name	pattern binding	0.00015998	3.1473	12	9	56	0.00513
225	GOMF name	heparin binding	0.00020299	3.6719	8	7	56	0.0057433
225	GOBP name	regulation of cell-substrate adhesion	4.9294e-05	3.7302	9	8	56	0.0089411
225	GOBP name	positive regulation of cell adhesion	4.9294e-05	3.7302	9	8	56	0.0096862
225	GOMF name	carbohydrate binding	0.00040367	2.5645	18	11	56	0.010219
225	GOCC name	fibrillar collagen	0.00066755	4.1964	5	5	56	0.010681
225	GOMF name	glycosaminoglycan binding	0.00055993	3.0519	11	8	56	0.013466
225	KEGG name	ECM-receptor interaction	0.00012163	2.9974	14	10	56	0.013744
225	GOBP name	positive regulation of cell-substrate adhesion	0.00014802	4.1964	6	6	56	0.023269
225	GOBP name	ossification	0.00014802	4.1964	6	6	56	0.024931
225	GOMF name	calcium ion binding	0.0014197	2.1894	23	12	56	0.027315
