# Supplementary material for: The Brain Origin of Neonatal Microglia Determines the Content of Exosomes and Biological Function
Source: Preprints.org preprint supplement (doi:10.20944/preprints201907.0102.v1), 2019-07-08
Supplement: Supplementary file 7 [file Supplementary data 13.xlsx]

## Sheet: Feuil1
Protein IDs	Majority protein IDs	Protein names	Gene names	Gene name	GOBP name	GOCC name	GOMF name	KEGG name
A0A0A0MY49;A0A0A0MY48;P39052-4;P39052-3;P39052-2;P39052	A0A0A0MY49;A0A0A0MY48;P39052-4;P39052-3;P39052-2;P39052	Dynamin-2	Dnm2	Dnm2	cellular macromolecule metabolic process	cell part;cytoplasmic part;cytoskeletal part;intracellular non-membrane-bounded organelle;intracellular organelle;intracellular organelle part;intracellular part;macromolecular complex;microtubule;non-membrane-bounded organelle;organelle part;protein complex	hydrolase activity, acting on acid anhydrides;hydrolase activity, acting on acid anhydrides, in phosphorus-containing anhydrides;nucleoside-triphosphatase activity;nucleotide binding;purine nucleotide binding;purine ribonucleoside triphosphate binding;purine ribonucleotide binding;pyrophosphatase activity;ribonucleotide binding
A0A0G2JT93;Q9WU82	A0A0G2JT93;Q9WU82	Catenin beta-1	Ctnnb1	Ctnnb1	cellular macromolecule metabolic process	cell part;cytoplasmic part;cytoskeletal part;intracellular non-membrane-bounded organelle;intracellular organelle;intracellular organelle part;intracellular part;macromolecular complex;non-membrane-bounded organelle;nuclear part;organelle part;protein complex	nucleic acid binding
A0A0G2JTW5;G3V8B6;O88761	A0A0G2JTW5;G3V8B6;O88761	26S proteasome non-ATPase regulatory subunit 1	Psmd1	Psmd1		cell part;intracellular part;macromolecular complex;protein complex
A0A0G2JUC7;Q6AYH5	A0A0G2JUC7;Q6AYH5	Dynactin subunit 2	Dctn2	Dctn2		cell part;cytoplasmic part;cytoskeletal part;intracellular non-membrane-bounded organelle;intracellular organelle;intracellular organelle part;intracellular part;macromolecular complex;microtubule;non-membrane-bounded organelle;organelle part;protein complex	hydrolase activity, acting on acid anhydrides;hydrolase activity, acting on acid anhydrides, in phosphorus-containing anhydrides;nucleoside-triphosphatase activity;pyrophosphatase activity
A0A0G2JUL7;B3GNI6-3;B3GNI6;B3GNI6-2	A0A0G2JUL7;B3GNI6-3;B3GNI6;B3GNI6-2	Septin-11	Septin-11	Septin-11		cell part;cytoskeletal part;intracellular organelle part;intracellular part;organelle part	nucleotide binding;purine nucleotide binding;purine ribonucleoside triphosphate binding;purine ribonucleotide binding;ribonucleotide binding
Q5XI19;A0A0G2JWC7	Q5XI19;A0A0G2JWC7		Fermt2	Fermt2		cell part;cytoskeletal part;intracellular organelle part;intracellular part;macromolecular complex;nuclear part;organelle part;protein complex
A0A0G2JXB1;V5QQP9;A0A0G2JXN6;P08699	A0A0G2JXB1;V5QQP9;A0A0G2JXN6;P08699	Galectin;Galectin-3	Lgals3	Lgals3	cellular macromolecule metabolic process	cell part;cytoplasmic part;intracellular organelle;intracellular organelle part;intracellular part;macromolecular complex;nuclear part;organelle part;ribonucleoprotein complex
D4A8D5;A0A0G2JXT8	D4A8D5;A0A0G2JXT8		Flnb	Flnb
Q6IMY8;A0A0G2JZ52	Q6IMY8;A0A0G2JZ52		Hnrnpu	Hnrnpu	cellular macromolecule metabolic process	cell part;cytoplasmic part;intracellular organelle part;intracellular part;macromolecular complex;nuclear part;organelle part;protein complex;ribonucleoprotein complex
A0A0G2JZ56;A0A0G2KAS9;F1M9N9;F1M5N3;A0A0G2K6R9;A0A0G2KBB9;F1LM42;M0R511;F1LZM2;D4A4Q9	A0A0G2JZ56;A0A0G2KAS9;F1M9N9;F1M5N3;A0A0G2K6R9;A0A0G2KBB9;F1LM42		Ank2	Ank2		cell part;cytoplasmic part;intracellular non-membrane-bounded organelle;intracellular organelle;intracellular part;non-membrane-bounded organelle;organelle part
A0A0G2JZ69;A0A0G2K1Y8;E9PSZ3;A0A0G2K1E7;P16086;Q6XDA1;D4A678	A0A0G2JZ69;A0A0G2K1Y8;E9PSZ3;A0A0G2K1E7;P16086	Spectrin alpha chain, non-erythrocytic 1	Sptan1	Spta1;Sptan1		cell part;cytoplasmic part;cytoskeletal part;intracellular non-membrane-bounded organelle;intracellular organelle;intracellular organelle part;intracellular part;macromolecular complex;non-membrane-bounded organelle;organelle part;protein complex
A0A0G2JZG7;Q6P799	A0A0G2JZG7;Q6P799	Serine--tRNA ligase, cytoplasmic	Sars	Sars	cellular macromolecule metabolic process	cell part;cytoplasmic part;intracellular organelle;intracellular part	adenyl nucleotide binding;adenyl ribonucleotide binding;ATP binding;nucleotide binding;purine nucleotide binding;purine ribonucleoside triphosphate binding;purine ribonucleotide binding;ribonucleotide binding
A0A0G2JZI2;Q6TXE9	A0A0G2JZI2;Q6TXE9		Eprs	Eprs	cellular macromolecule metabolic process	cell part;intracellular part;macromolecular complex;protein complex;ribonucleoprotein complex	adenyl nucleotide binding;adenyl ribonucleotide binding;ATP binding;nucleic acid binding;nucleotide binding;purine nucleotide binding;purine ribonucleoside triphosphate binding;purine ribonucleotide binding;ribonucleotide binding;RNA binding
F1LMC7;A0A0G2JZT5;D4A0F5;Q9WVC0;Q7TP92;A0A0G2JV25;A0A0G2K5F4;D3ZHG7;A0A0H2UI27;Q5PQK1	F1LMC7;A0A0G2JZT5;D4A0F5;Q9WVC0	Septin-7	Septin-7	Sept10;Sept14;Sept7		cell part;cytoplasmic part;cytoskeletal part;intracellular non-membrane-bounded organelle;intracellular organelle;intracellular organelle part;intracellular part;macromolecular complex;non-membrane-bounded organelle;nuclear part;nucleolus;organelle part;protein complex	nucleotide binding;purine nucleotide binding;purine ribonucleoside triphosphate binding;purine ribonucleotide binding;ribonucleotide binding
F1LUA1;A0A0G2K051	F1LUA1;A0A0G2K051		Eea1	Eea1		cell part;cytoplasmic part;intracellular organelle;intracellular part;macromolecular complex;protein complex
A0A0G2K0B4;A0A0G2K8P3;Q62940	A0A0G2K0B4;A0A0G2K8P3;Q62940	E3 ubiquitin-protein ligase NEDD4	Nedd4	Nedd4	cellular macromolecule metabolic process	cell part;intracellular organelle;intracellular part
M0R961;A0A0G2K2B3;Q99PF5	M0R961;A0A0G2K2B3;Q99PF5	Far upstream element-binding protein 2	Khsrp	Khsrp	cellular macromolecule metabolic process	cell part;cytoplasmic part;intracellular non-membrane-bounded organelle;intracellular organelle;intracellular organelle part;intracellular part;macromolecular complex;non-membrane-bounded organelle;nuclear part;organelle part;ribonucleoprotein complex	nucleic acid binding;RNA binding
A0A0G2K3Q6;P09117;A0A0G2QC57	A0A0G2K3Q6;P09117;A0A0G2QC57	Fructose-bisphosphate aldolase C	Aldoc	Aldoc		cell part;cytoplasmic part;intracellular organelle;intracellular part
A0A0G2K428;D4A8U7;P28023	A0A0G2K428;D4A8U7;P28023	Dynactin subunit 1	Dctn1	Dctn1		cell part;cytoplasmic part;cytoskeletal part;intracellular non-membrane-bounded organelle;intracellular organelle;intracellular organelle part;intracellular part;macromolecular complex;microtubule;non-membrane-bounded organelle;organelle part;protein complex	hydrolase activity, acting on acid anhydrides;hydrolase activity, acting on acid anhydrides, in phosphorus-containing anhydrides;nucleoside-triphosphatase activity;pyrophosphatase activity
A0A0G2K654	A0A0G2K654
A0A0G2K714;Q6AYE2	A0A0G2K714;Q6AYE2	Endophilin-B1	Sh3glb1	Sh3glb1	cellular macromolecule metabolic process	cell part;cytoplasmic part;intracellular organelle part;intracellular part;macromolecular complex;organelle part;protein complex
G3V9Z6;A0A0G2K7G7;B0BNF1;A0A0G2JVY6	G3V9Z6;A0A0G2K7G7;B0BNF1;A0A0G2JVY6	Septin-8	Septin-8	Septin-8		cell part;intracellular non-membrane-bounded organelle;intracellular organelle;intracellular part;non-membrane-bounded organelle	nucleotide binding;purine nucleotide binding;purine ribonucleoside triphosphate binding;purine ribonucleotide binding;ribonucleotide binding
A0A0G2K890;P31977	A0A0G2K890;P31977	Ezrin	Ezr	Ezr	cellular macromolecule metabolic process	cell part;cytoplasmic part;cytoskeletal part;intracellular non-membrane-bounded organelle;intracellular organelle;intracellular organelle part;intracellular part;macromolecular complex;non-membrane-bounded organelle;nuclear part;nucleolus;organelle part;protein complex
A0A0G2K8K0	A0A0G2K8K0
M0R3Z1;A0A0G2K9I4;G3V8F8;P21263-2;P21263;M0RCP0;D3ZWJ2	M0R3Z1;A0A0G2K9I4;G3V8F8;P21263-2;P21263	Nestin	LOC100910255;Nes	LOC100910255;Nes		cell part;cytoskeletal part;intracellular organelle part;intracellular part;macromolecular complex;organelle part;protein complex
Q52KS1;A0A0G2KBC7;P47858	Q52KS1;A0A0G2KBC7;P47858	ATP-dependent 6-phosphofructokinase;ATP-dependent 6-phosphofructokinase, muscle type	Pfkm	Pfkm		cell part;cytoplasmic part;intracellular part;macromolecular complex;protein complex	adenyl nucleotide binding;adenyl ribonucleotide binding;ATP binding;nucleotide binding;purine nucleotide binding;purine ribonucleoside triphosphate binding;purine ribonucleotide binding;ribonucleotide binding
A0A0H2UHM7;Q6AYZ1	A0A0H2UHM7;Q6AYZ1	Tubulin alpha-1C chain	Tuba1c	Tuba1c		cell part;cytoplasmic part;cytoskeletal part;intracellular organelle;intracellular organelle part;intracellular part;macromolecular complex;microtubule;organelle part;protein complex	hydrolase activity, acting on acid anhydrides;hydrolase activity, acting on acid anhydrides, in phosphorus-containing anhydrides;nucleoside-triphosphatase activity;nucleotide binding;purine nucleotide binding;purine ribonucleoside triphosphate binding;purine ribonucleotide binding;pyrophosphatase activity;ribonucleotide binding
X1WI37;A0A0H2UHX3;P62703;D3ZX01	X1WI37;A0A0H2UHX3;P62703;D3ZX01	40S ribosomal protein S4, X isoform;40S ribosomal protein S4	LOC100362640;Rps4x;Rps4y2	LOC100362640;Rps4x;Rps4y2	cellular macromolecule metabolic process	cell part;cytoplasmic part;intracellular non-membrane-bounded organelle;intracellular organelle;intracellular organelle part;intracellular part;macromolecular complex;non-membrane-bounded organelle;nuclear part;nucleolus;organelle part;ribonucleoprotein complex;ribosome	nucleic acid binding;RNA binding;structural constituent of ribosome	Ribosome
D4A6G6;A0A0H2UI38;P17074;F1M8C7;D3ZGN8;D3ZSH6;F1M764;F1LYF3;D3ZUD7	D4A6G6;A0A0H2UI38;P17074;F1M8C7;D3ZGN8;D3ZSH6;F1M764;F1LYF3	40S ribosomal protein S19	LOC100362339;Rps19;LOC100360843;Rps19l1	LOC100360843;LOC100362339;LOC687298;Rps19;Rps19l1	cellular macromolecule metabolic process	cell part;cytoplasmic part;intracellular non-membrane-bounded organelle;intracellular organelle;intracellular organelle part;intracellular part;macromolecular complex;non-membrane-bounded organelle;nuclear part;nucleolus;organelle part;ribonucleoprotein complex;ribosome	structural constituent of ribosome	Ribosome
A9CMB7;P15178	A9CMB7;P15178	Aspartate--tRNA ligase, cytoplasmic	Dars	Dars	cellular macromolecule metabolic process	cell part;intracellular part;macromolecular complex;protein complex	adenyl nucleotide binding;adenyl ribonucleotide binding;ATP binding;nucleotide binding;purine nucleotide binding;purine ribonucleoside triphosphate binding;purine ribonucleotide binding;ribonucleotide binding
B0BN93	B0BN93	26S proteasome non-ATPase regulatory subunit 13	Psmd13	Psmd13		cell part;intracellular organelle;intracellular part;macromolecular complex;protein complex
M0RCH0;B0BNA7	M0RCH0;B0BNA7	Eukaryotic translation initiation factor 3 subunit I	Eif3i	Eif3i		cell part;cytoplasmic part;intracellular part;macromolecular complex;protein complex;ribonucleoprotein complex	nucleic acid binding;RNA binding
B0BNK1;M0RC99;Q6IN17	B0BNK1		Rab5c	Rab5a;Rab5c	cellular macromolecule metabolic process	cell part;cytoplasmic part;intracellular non-membrane-bounded organelle;intracellular organelle;intracellular organelle part;intracellular part;macromolecular complex;non-membrane-bounded organelle;organelle part;protein complex	hydrolase activity, acting on acid anhydrides;hydrolase activity, acting on acid anhydrides, in phosphorus-containing anhydrides;nucleoside-triphosphatase activity;nucleotide binding;purine nucleotide binding;purine ribonucleoside triphosphate binding;purine ribonucleotide binding;pyrophosphatase activity;ribonucleotide binding
B0K031;P05426;F1LUE9;Q7TP62	B0K031;P05426	60S ribosomal protein L7	Rpl7	LOC367195;Rpl7		cell part;cytoplasmic part;intracellular non-membrane-bounded organelle;intracellular organelle;intracellular part;macromolecular complex;non-membrane-bounded organelle;ribonucleoprotein complex;ribosome	nucleic acid binding;RNA binding	Ribosome
B2RZC6;A0A0H2UHX8;Q7TP98	B2RZC6		Ilf2	Ilf2	cellular macromolecule metabolic process	cell part;intracellular non-membrane-bounded organelle;intracellular organelle;intracellular organelle part;intracellular part;macromolecular complex;non-membrane-bounded organelle;nuclear part;nucleolus;organelle part;ribonucleoprotein complex	adenyl nucleotide binding;adenyl ribonucleotide binding;ATP binding;nucleic acid binding;nucleotide binding;purine nucleotide binding;purine ribonucleoside triphosphate binding;purine ribonucleotide binding;ribonucleotide binding;RNA binding
F1LT35;D3ZTH8;B5DES1;P62752;D3ZTX9;D3ZSR8;D3ZNM1;D4AAL7;D3ZFK7;M0RE17;A0A0G2JU90	F1LT35;D3ZTH8;B5DES1;P62752;D3ZTX9;D3ZSR8;D3ZNM1;D4AAL7;D3ZFK7	60S ribosomal protein L23a	RGD1564606;LOC689899;Rpl23a;RGD1565170;LOC680441;RGD1562755;LOC683904;LOC690335	LOC680441;LOC683904;LOC689899;LOC690335;RGD1562755;RGD1564378;RGD1564606;RGD1565170;Rpl23a	cellular macromolecule metabolic process	cell part;cytoplasmic part;intracellular non-membrane-bounded organelle;intracellular organelle;intracellular organelle part;intracellular part;macromolecular complex;non-membrane-bounded organelle;organelle part;ribonucleoprotein complex;ribosome	nucleic acid binding;nucleotide binding;RNA binding;structural constituent of ribosome	Ribosome
B5DFC8	B5DFC8	Eukaryotic translation initiation factor 3 subunit C	Eif3c	Eif3c		cell part;cytoplasmic part;intracellular part;macromolecular complex;protein complex;ribonucleoprotein complex	nucleic acid binding;RNA binding
B5DFN2;D3ZWL6	B5DFN2;D3ZWL6	Adenosylhomocysteinase	Ahcyl1;Ahcyl2	Ahcyl1;Ahcyl2		cell part;cytoplasmic part;intracellular part
D3Z941	D3Z941		Mars	Mars	cellular macromolecule metabolic process	cell part;cytoplasmic part;intracellular organelle;intracellular part	adenyl nucleotide binding;adenyl ribonucleotide binding;ATP binding;nucleotide binding;purine nucleotide binding;purine ribonucleoside triphosphate binding;purine ribonucleotide binding;ribonucleotide binding
D3ZBN0	D3ZBN0	Histone H1.5	Hist1h1b	Hist1h1b		cell part;intracellular organelle part;intracellular part;macromolecular complex;nuclear part;organelle part	nucleic acid binding
O70509;D3ZGF1;F1LSA1;P26051-2;P26051	O70509;D3ZGF1;F1LSA1;P26051-2;P26051	CD44 antigen	Cd44	Cd44		cell part;cytoplasmic part;intracellular organelle;intracellular part;macromolecular complex;protein complex
M0R590;D3ZGY4;P04797;M0R660;E9PTN6;E9PTV9;A0A0G2K8S2;A0A0G2K7M1;F1LUI2;F1M2N4;F1LUV3;D3ZQT0;B1WBQ8;Q9ESV6;D3ZEN2;D3ZME3;F1M4G6;D3ZWV2;Q498M9;F1M8P6;F1M269;F1LU03;A0A0G2JYY8	M0R590;D3ZGY4;P04797;M0R660	Glyceraldehyde-3-phosphate dehydrogenase	LOC685186;Gapdh-ps2;Gapdh;RGD1565368	Gapdh;Gapdh-ps2;Gapdhs;LOC291543;LOC303448;LOC685186;RGD1562758;RGD1564688;RGD1565368	cellular macromolecule metabolic process	cell part;cytoplasmic part;intracellular non-membrane-bounded organelle;intracellular organelle;intracellular organelle part;intracellular part;non-membrane-bounded organelle;organelle part	nucleotide binding
F1M013;D3ZU22;D3ZPL5;P62425;M0R3M3;F1M4C7;D4A6B9;F1M1M2;D4A8X2;D3ZJH5;D3ZNA3;F1M2Q3;F1M0S7;M0R7A4;D3ZD15;Q7TQ86;A0A0G2K6A5	F1M013;D3ZU22;D3ZPL5;P62425;M0R3M3;F1M4C7;D4A6B9;F1M1M2;D4A8X2;D3ZJH5	60S ribosomal protein L7a	LOC100910109;LOC100361311;RGD1562953;Rpl7a;RGD1563045;LOC680161;RGD1563220;LOC100911966	LOC100361311;LOC100910109;LOC100911966;LOC100911987;LOC680161;RGD1562953;RGD1563045;RGD1563220;RGD1564370;Rpl7a;Rsl1d1		cell part;cytoplasmic part;intracellular non-membrane-bounded organelle;intracellular organelle;intracellular part;macromolecular complex;non-membrane-bounded organelle;ribonucleoprotein complex;ribosome	nucleic acid binding;RNA binding	Ribosome
D3ZRM9;P41123;A0A0G2JYG9;F1M2E9;D3ZD02	D3ZRM9;P41123;A0A0G2JYG9;F1M2E9;D3ZD02	60S ribosomal protein L13	LOC100360491;Rpl13;RGD1563145	LOC100360491;RGD1563145;Rpl13	cellular macromolecule metabolic process	cell part;cytoplasmic part;intracellular non-membrane-bounded organelle;intracellular organelle;intracellular organelle part;intracellular part;macromolecular complex;non-membrane-bounded organelle;organelle part;ribonucleoprotein complex;ribosome	structural constituent of ribosome	Ribosome
D3ZX87;P62902;D3ZK34;D3ZKU5;D4ACQ2;D4ABZ9;D3ZVY6;D3ZU04;D3Z8W1;D3ZZ60;A0A0G2K7E3;D3ZLA5;D3ZAC7;D4ACA9;D3ZDE9;D4A172;D3ZVF5	D3ZX87;P62902;D3ZK34;D3ZKU5;D4ACQ2;D4ABZ9;D3ZVY6;D3ZU04;D3Z8W1;D3ZZ60;A0A0G2K7E3;D3ZLA5;D3ZAC7	60S ribosomal protein L31	LOC100910017;Rpl31;RGD1565894;RGD1564839;LOC690384;Rpl31l4;LOC100359986;LOC102550734;LOC680384;LOC681356;LOC681338;RGD1561841	LOC100359986;LOC100910017;LOC102550734;LOC680384;LOC681338;LOC681356;LOC690384;RGD1561195;RGD1561841;RGD1562055;RGD1564839;RGD1565894;Rpl31;Rpl31l3;Rpl31l4	cellular macromolecule metabolic process	cell part;cytoplasmic part;intracellular non-membrane-bounded organelle;intracellular organelle;intracellular organelle part;intracellular part;macromolecular complex;non-membrane-bounded organelle;organelle part;ribonucleoprotein complex;ribosome	structural constituent of ribosome	Ribosome
D4A6W6;P62919	D4A6W6;P62919	60S ribosomal protein L8	RGD1561333;Rpl8	RGD1561333;Rpl8	cellular macromolecule metabolic process	cell part;intracellular organelle part;intracellular part;macromolecular complex;organelle part;ribonucleoprotein complex	nucleic acid binding;RNA binding;structural constituent of ribosome	Ribosome
D4A8H8;A0A0G2K472;A0A0G2JT63;D3ZX82	D4A8H8;A0A0G2K472		Cyfip1	Cyfip1;Cyfip2		cell part;cytoplasmic part;intracellular part;macromolecular complex;protein complex
D4A9D6	D4A9D6		Dhx9	Dhx9	cellular macromolecule metabolic process	cell part;cytoplasmic part;cytoskeletal part;intracellular non-membrane-bounded organelle;intracellular organelle;intracellular organelle part;intracellular part;macromolecular complex;non-membrane-bounded organelle;nuclear part;nucleolus;organelle part;protein complex;ribonucleoprotein complex	adenyl nucleotide binding;adenyl ribonucleotide binding;ATP binding;ATPase activity;hydrolase activity, acting on acid anhydrides;hydrolase activity, acting on acid anhydrides, in phosphorus-containing anhydrides;nucleoside-triphosphatase activity;nucleotide binding;purine nucleotide binding;purine ribonucleoside triphosphate binding;purine ribonucleotide binding;pyrophosphatase activity;ribonucl…
D4AC23	D4AC23		Cct7	Cct7	cellular macromolecule metabolic process	cell part;cytoplasmic part;cytoskeletal part;intracellular organelle;intracellular organelle part;intracellular part;macromolecular complex;microtubule;organelle part;protein complex	adenyl nucleotide binding;adenyl ribonucleotide binding;ATP binding;nucleotide binding;purine nucleotide binding;purine ribonucleoside triphosphate binding;purine ribonucleotide binding;ribonucleotide binding
D4AC36	D4AC36		Eif3f	Eif3f	cellular macromolecule metabolic process	cell part;cytoplasmic part;intracellular part;macromolecular complex;protein complex	nucleic acid binding;RNA binding
D4ACB8	D4ACB8		Cct8	Cct8	cellular macromolecule metabolic process	cell part;cytoplasmic part;cytoskeletal part;intracellular non-membrane-bounded organelle;intracellular organelle;intracellular organelle part;intracellular part;macromolecular complex;microtubule;non-membrane-bounded organelle;organelle part;protein complex	adenyl nucleotide binding;adenyl ribonucleotide binding;ATP binding;nucleotide binding;purine nucleotide binding;purine ribonucleoside triphosphate binding;purine ribonucleotide binding;ribonucleotide binding
D4AE96	D4AE96		Ipo7	Ipo7		cell part;intracellular organelle part;intracellular part;nuclear part;organelle part
F1LMZ8;A0A0G2JWX1;D3Z950	F1LMZ8;A0A0G2JWX1;D3Z950	26S proteasome non-ATPase regulatory subunit 11	Psmd11	Psmd11	cellular macromolecule metabolic process	cell part;cytoplasmic part;intracellular organelle;intracellular part;macromolecular complex;protein complex
F1LRI5	F1LRI5		Gcn1l1	Gcn1l1		cell part;intracellular part
F1LRL9;P15205	F1LRL9;P15205	Microtubule-associated protein 1B;MAP1B heavy chain;MAP1 light chain LC1	Map1b	Map1b		cell part;cytoplasmic part;cytoskeletal part;intracellular non-membrane-bounded organelle;intracellular organelle;intracellular organelle part;intracellular part;macromolecular complex;microtubule;non-membrane-bounded organelle;organelle part;protein complex
F1M779;P11442	F1M779;P11442	Clathrin heavy chain;Clathrin heavy chain 1	Cltc	Cltc		cell part;cytoplasmic part;cytoskeletal part;intracellular non-membrane-bounded organelle;intracellular organelle;intracellular organelle part;intracellular part;macromolecular complex;non-membrane-bounded organelle;organelle part;protein complex
F1M853	F1M853		Rrbp1	Rrbp1		cell part;cytoplasmic part;intracellular organelle part;intracellular part;organelle part
G3V6D3;P10719	G3V6D3;P10719	ATP synthase subunit beta;ATP synthase subunit beta, mitochondrial	Atp5b	Atp5b		cell part;cytoplasmic part;intracellular non-membrane-bounded organelle;intracellular organelle;intracellular organelle part;intracellular part;macromolecular complex;non-membrane-bounded organelle;organelle part;protein complex	adenyl nucleotide binding;adenyl ribonucleotide binding;ATP binding;ATPase activity;hydrolase activity, acting on acid anhydrides;hydrolase activity, acting on acid anhydrides, in phosphorus-containing anhydrides;nucleoside-triphosphatase activity;nucleotide binding;purine nucleotide binding;purine ribonucleoside triphosphate binding;purine ribonucleotide binding;pyrophosphatase activity;ribonucl…
G3V6H9;Q9Z2G8;D4AEJ0	G3V6H9;Q9Z2G8	Nucleosome assembly protein 1-like 1	Nap1l1	Nap1l1;RGD1560617		cell part;cytoplasmic part;intracellular organelle;intracellular part
G3V6I9;D4A1Z2;P12749;D4AE42;M0R6L3	G3V6I9;D4A1Z2;P12749	60S ribosomal protein L26	Rpl26;Rpl26-ps2	LOC100910721;Rpl26;Rpl26-ps1;Rpl26-ps2	cellular macromolecule metabolic process	cell part;intracellular organelle part;intracellular part;macromolecular complex;organelle part;ribonucleoprotein complex	structural constituent of ribosome	Ribosome
G3V6P7;Q62812	G3V6P7;Q62812	Myosin-9	LOC100911597;Myh9	LOC100911597;Myh9		cell part;cytoplasmic part;cytoskeletal part;intracellular non-membrane-bounded organelle;intracellular organelle;intracellular organelle part;intracellular part;macromolecular complex;non-membrane-bounded organelle;organelle part;protein complex	adenyl nucleotide binding;adenyl ribonucleotide binding;ATP binding;ATPase activity;hydrolase activity, acting on acid anhydrides;hydrolase activity, acting on acid anhydrides, in phosphorus-containing anhydrides;nucleoside-triphosphatase activity;nucleotide binding;purine nucleotide binding;purine ribonucleoside triphosphate binding;purine ribonucleotide binding;pyrophosphatase activity;ribonucl…
G3V6T1	G3V6T1	Coatomer subunit alpha	Copa	Copa		cell part;cytoplasmic part;intracellular organelle part;intracellular part;macromolecular complex;organelle part;protein complex
G3V6W6	G3V6W6		Psmc6	Psmc6	cellular macromolecule metabolic process	cell part;cytoplasmic part;intracellular organelle part;intracellular part;macromolecular complex;nuclear part;organelle part;protein complex	adenyl nucleotide binding;adenyl ribonucleotide binding;ATP binding;nucleotide binding;purine nucleotide binding;purine ribonucleoside triphosphate binding;purine ribonucleotide binding;ribonucleotide binding
G3V7L6;Q63347	G3V7L6;Q63347	26S protease regulatory subunit 7	Psmc2	Psmc2	cellular macromolecule metabolic process	cell part;cytoplasmic part;intracellular non-membrane-bounded organelle;intracellular organelle;intracellular organelle part;intracellular part;macromolecular complex;non-membrane-bounded organelle;nuclear part;organelle part;protein complex;ribonucleoprotein complex	adenyl nucleotide binding;adenyl ribonucleotide binding;ATP binding;ATPase activity;hydrolase activity, acting on acid anhydrides;hydrolase activity, acting on acid anhydrides, in phosphorus-containing anhydrides;nucleoside-triphosphatase activity;nucleotide binding;purine nucleotide binding;purine ribonucleoside triphosphate binding;purine ribonucleotide binding;pyrophosphatase activity;ribonucl…
G3V8A5	G3V8A5		Vps35	Vps35		cell part;cytoplasmic part;intracellular organelle;intracellular organelle part;intracellular part;macromolecular complex;organelle part;protein complex
G3V8T5	G3V8T5		Ruvbl2	Ruvbl2	cellular macromolecule metabolic process	cell part;intracellular organelle part;intracellular part;macromolecular complex;nuclear part;organelle part;protein complex;ribonucleoprotein complex	adenyl nucleotide binding;adenyl ribonucleotide binding;ATP binding;ATPase activity;hydrolase activity, acting on acid anhydrides;hydrolase activity, acting on acid anhydrides, in phosphorus-containing anhydrides;nucleic acid binding;nucleoside-triphosphatase activity;nucleotide binding;purine nucleotide binding;purine ribonucleoside triphosphate binding;purine ribonucleotide binding;pyrophosphat…
G3V8U9;P34067	G3V8U9;P34067	Proteasome subunit beta type;Proteasome subunit beta type-4	Psmb4	Psmb4	cellular macromolecule metabolic process	cell part;intracellular organelle;intracellular part;macromolecular complex;protein complex
M0R735;R9PXZ2;A0A0G2K9J1;Q7TP47	M0R735;R9PXZ2;A0A0G2K9J1;Q7TP47	Heterogeneous nuclear ribonucleoprotein Q	Syncrip	Syncrip	cellular macromolecule metabolic process	cell part;cytoplasmic part;intracellular organelle part;intracellular part;macromolecular complex;nuclear part;organelle part;protein complex;ribonucleoprotein complex	nucleic acid binding;nucleotide binding;RNA binding
M0R9X8;F1LRT9;P38650	M0R9X8;F1LRT9;P38650	Cytoplasmic dynein 1 heavy chain 1	Dync1h1	Dync1h1		cell part;cytoplasmic part;cytoskeletal part;intracellular non-membrane-bounded organelle;intracellular organelle;intracellular organelle part;intracellular part;macromolecular complex;microtubule;non-membrane-bounded organelle;organelle part;protein complex	adenyl nucleotide binding;adenyl ribonucleotide binding;ATP binding;ATPase activity;hydrolase activity, acting on acid anhydrides;hydrolase activity, acting on acid anhydrides, in phosphorus-containing anhydrides;nucleoside-triphosphatase activity;nucleotide binding;purine nucleotide binding;purine ribonucleoside triphosphate binding;purine ribonucleotide binding;pyrophosphatase activity;ribonucl…
O35142;A0A0G2K0P9	O35142	Coatomer subunit beta	Copb2	Copb2		cell part;cytoplasmic part;intracellular organelle;intracellular organelle part;intracellular part;macromolecular complex;organelle part;protein complex
O55215;P27952;A0A0G2KB28;D3ZIY7;E9PT76;M0RAJ8;D3ZQW7;D3ZT78;O55213	O55215;P27952;A0A0G2KB28;D3ZIY7;E9PT76;M0RAJ8	40S ribosomal protein S2	Rps2-ps6;Rps2;LOC100359960	Gm8225;LOC100359960;Rps2;Rps2-ps6	cellular macromolecule metabolic process	cell part;cytoplasmic part;intracellular non-membrane-bounded organelle;intracellular organelle;intracellular organelle part;intracellular part;macromolecular complex;non-membrane-bounded organelle;organelle part;ribonucleoprotein complex;ribosome	nucleic acid binding;RNA binding;structural constituent of ribosome	Ribosome
Q6IN22;P00787	Q6IN22;P00787	Cathepsin B;Cathepsin B light chain;Cathepsin B heavy chain	Ctsb	Ctsb		cell part;cytoplasmic part;intracellular non-membrane-bounded organelle;intracellular organelle;intracellular organelle part;intracellular part;non-membrane-bounded organelle;nuclear part;nucleolus;organelle part
P06685	P06685	Sodium/potassium-transporting ATPase subunit alpha-1	Atp1a1	Atp1a1		cell part;cytoplasmic part;intracellular organelle;intracellular part;macromolecular complex;protein complex	adenyl nucleotide binding;adenyl ribonucleotide binding;ATP binding;ATPase activity;hydrolase activity, acting on acid anhydrides;hydrolase activity, acting on acid anhydrides, in phosphorus-containing anhydrides;nucleoside-triphosphatase activity;nucleotide binding;purine nucleotide binding;purine ribonucleoside triphosphate binding;purine ribonucleotide binding;pyrophosphatase activity;ribonucl…
P06686;P06687;A0A0G2JWS9;F1LRK1;G3V8S4;P54708-2;Q64541;P09626;P54708	P06686	Sodium/potassium-transporting ATPase subunit alpha-2	Atp1a2	Atp12a;Atp1a2;Atp1a3;Atp1a4;Atp4a		cell part;cytoplasmic part;intracellular organelle;intracellular part;macromolecular complex;protein complex	adenyl nucleotide binding;adenyl ribonucleotide binding;ATP binding;ATPase activity;hydrolase activity, acting on acid anhydrides;hydrolase activity, acting on acid anhydrides, in phosphorus-containing anhydrides;nucleoside-triphosphatase activity;nucleotide binding;purine nucleotide binding;purine ribonucleoside triphosphate binding;purine ribonucleotide binding;pyrophosphatase activity;ribonucl…
P07150	P07150	Annexin A1	Anxa1	Anxa1	cellular macromolecule metabolic process	cell part;cytoplasmic part;intracellular non-membrane-bounded organelle;intracellular organelle;intracellular organelle part;intracellular part;macromolecular complex;non-membrane-bounded organelle;organelle part;protein complex	ATPase activity;hydrolase activity, acting on acid anhydrides;hydrolase activity, acting on acid anhydrides, in phosphorus-containing anhydrides;nucleic acid binding;nucleoside-triphosphatase activity;pyrophosphatase activity
P09895;D3ZHP8	P09895;D3ZHP8	60S ribosomal protein L5	Rpl5;Rpl5l1	Rpl5;Rpl5l1	cellular macromolecule metabolic process	cell part;cytoplasmic part;intracellular non-membrane-bounded organelle;intracellular organelle;intracellular organelle part;intracellular part;macromolecular complex;non-membrane-bounded organelle;nuclear part;nucleolus;organelle part;protein complex;ribonucleoprotein complex;ribosome	nucleic acid binding;RNA binding;structural constituent of ribosome	Ribosome
Q5U328;P13383	Q5U328;P13383	Nucleolin	Ncl	Ncl		cell part;cytoplasmic part;intracellular non-membrane-bounded organelle;intracellular organelle;intracellular organelle part;intracellular part;macromolecular complex;non-membrane-bounded organelle;nuclear part;nucleolus;organelle part;ribonucleoprotein complex	nucleic acid binding;nucleotide binding;RNA binding
Q66HH8;P14668	Q66HH8;P14668	Annexin;Annexin A5	Anxa5	Anxa5		cell part;cytoplasmic part;intracellular organelle;intracellular part;organelle part
P17078;F1M6G3;D3ZN79;D3ZB50;D3Z942	P17078;F1M6G3;D3ZN79	60S ribosomal protein L35	Rpl35;Gm8444;LOC686074	Gm8444;LOC686074;RGD1563157;Rpl35	cellular macromolecule metabolic process	cell part;cytoplasmic part;intracellular non-membrane-bounded organelle;intracellular organelle;intracellular part;macromolecular complex;non-membrane-bounded organelle;ribonucleoprotein complex;ribosome	structural constituent of ribosome	Ribosome
P18420	P18420	Proteasome subunit alpha type-1	Psma1	Psma1	cellular macromolecule metabolic process	cell part;intracellular organelle;intracellular part;macromolecular complex;protein complex
P21531	P21531	60S ribosomal protein L3	Rpl3	Rpl3	cellular macromolecule metabolic process	cell part;cytoplasmic part;intracellular non-membrane-bounded organelle;intracellular organelle;intracellular organelle part;intracellular part;macromolecular complex;non-membrane-bounded organelle;nuclear part;nucleolus;organelle part;ribonucleoprotein complex;ribosome	structural constituent of ribosome	Ribosome
P21670	P21670	Proteasome subunit alpha type-4	Psma4	Psma4	cellular macromolecule metabolic process	cell part;cytoplasmic part;intracellular non-membrane-bounded organelle;intracellular organelle;intracellular part;macromolecular complex;non-membrane-bounded organelle;protein complex;ribonucleoprotein complex
P23514	P23514	Coatomer subunit beta	Copb1	Copb1		cell part;cytoplasmic part;intracellular organelle;intracellular organelle part;intracellular part;macromolecular complex;organelle part;protein complex
P28480;A0A096MJA0	P28480;A0A096MJA0	T-complex protein 1 subunit alpha	Tcp1	Tcp1	cellular macromolecule metabolic process	cell part;cytoplasmic part;cytoskeletal part;intracellular organelle;intracellular organelle part;intracellular part;macromolecular complex;microtubule;nuclear part;organelle part;protein complex	adenyl nucleotide binding;adenyl ribonucleotide binding;ATP binding;nucleotide binding;purine nucleotide binding;purine ribonucleoside triphosphate binding;purine ribonucleotide binding;ribonucleotide binding
P29314;A0A0G2K4C4;D3ZV50;M0RB65	P29314;A0A0G2K4C4;D3ZV50	40S ribosomal protein S9	Rps9;LOC100364509	LOC100364509;Rps9	cellular macromolecule metabolic process	cell part;intracellular non-membrane-bounded organelle;intracellular organelle;intracellular organelle part;intracellular part;macromolecular complex;non-membrane-bounded organelle;nuclear part;nucleolus;organelle part;ribonucleoprotein complex	nucleic acid binding;RNA binding;structural constituent of ribosome	Ribosome
P31000;G3V8C3;F1M7P4;P21807;G3V8Q2;G3V7S2;P23565;P19527;P12839	P31000;G3V8C3	Vimentin	Vim	Ina;Nefl;Nefm;Prph;Vim		cell part;cytoplasmic part;cytoskeletal part;intracellular non-membrane-bounded organelle;intracellular organelle;intracellular organelle part;intracellular part;macromolecular complex;non-membrane-bounded organelle;nuclear part;organelle part;protein complex	nucleic acid binding;RNA binding
P34058;A0A0G2K793	P34058;A0A0G2K793	Heat shock protein HSP 90-beta	Hsp90ab1	Hsp90ab1	cellular macromolecule metabolic process	cell part;cytoplasmic part;intracellular organelle;intracellular part	adenyl nucleotide binding;adenyl ribonucleotide binding;ATP binding;nucleotide binding;purine nucleotide binding;purine ribonucleoside triphosphate binding;purine ribonucleotide binding;ribonucleotide binding
Q5RK10;P35427	Q5RK10;P35427	60S ribosomal protein L13a	Rpl13a	Rpl13a	cellular macromolecule metabolic process	cell part;cytoplasmic part;intracellular non-membrane-bounded organelle;intracellular organelle;intracellular organelle part;intracellular part;macromolecular complex;non-membrane-bounded organelle;organelle part;ribonucleoprotein complex;ribosome	nucleic acid binding;RNA binding;structural constituent of ribosome	Ribosome
P37397;D3ZRX9	P37397	Calponin-3	Cnn3	Cnn2;Cnn3		cell part;cytoskeletal part;intracellular organelle part;intracellular part;macromolecular complex;microtubule;organelle part;protein complex
P38983	P38983	40S ribosomal protein SA	Rpsa	Rpsa	cellular macromolecule metabolic process	cell part;cytoplasmic part;intracellular organelle;intracellular organelle part;intracellular part;macromolecular complex;organelle part;ribonucleoprotein complex	structural constituent of ribosome	Ribosome
P40307	P40307	Proteasome subunit beta type-2	Psmb2	Psmb2	cellular macromolecule metabolic process	cell part;intracellular organelle;intracellular organelle part;intracellular part;macromolecular complex;nuclear part;organelle part;protein complex
P41542	P41542	General vesicular transport factor p115	Uso1	Uso1		cell part;cytoplasmic part;intracellular non-membrane-bounded organelle;intracellular organelle;intracellular organelle part;intracellular part;non-membrane-bounded organelle;nuclear part;nucleolus;organelle part
P47819-2;P47819	P47819-2;P47819	Glial fibrillary acidic protein	Gfap	Gfap		cell part;cytoskeletal part;intracellular organelle part;intracellular part;macromolecular complex;organelle part;protein complex
Q6IMZ3;P48037	Q6IMZ3;P48037	Annexin;Annexin A6	Anxa6	Anxa6		cell part;cytoplasmic part;intracellular organelle;intracellular part;macromolecular complex;protein complex
P49242;M0R6L4;Q6TXJ6	P49242;M0R6L4;Q6TXJ6	40S ribosomal protein S3a;40S ribosomal protein S3b;40S ribosomal protein S3a	Rps3a;LOC100365839;Cyld	Cyld;LOC100365839;Rps3a	cellular macromolecule metabolic process	cell part;cytoplasmic part;intracellular non-membrane-bounded organelle;intracellular organelle;intracellular organelle part;intracellular part;macromolecular complex;non-membrane-bounded organelle;organelle part;ribonucleoprotein complex;ribosome	structural constituent of ribosome	Ribosome
P50503	P50503	Hsc70-interacting protein	St13	St13	cellular macromolecule metabolic process	cell part;cytoplasmic part;intracellular part;macromolecular complex;protein complex	adenyl nucleotide binding;nucleotide binding;purine nucleotide binding
P52925;D3ZS25;D3ZN59	P52925;D3ZS25;D3ZN59	High mobility group protein B2	Hmgb2;RGD1561694;LOC100911856	Hmgb2;LOC100911856;RGD1561694	cellular macromolecule metabolic process	cell part;cytoplasmic part;intracellular non-membrane-bounded organelle;intracellular organelle;intracellular part;non-membrane-bounded organelle	nucleic acid binding
P59215-2;P59215	P59215-2;P59215	Guanine nucleotide-binding protein G(o) subunit alpha	Gnao1	Gnao1		cell part;intracellular part;macromolecular complex;protein complex	hydrolase activity, acting on acid anhydrides;hydrolase activity, acting on acid anhydrides, in phosphorus-containing anhydrides;nucleoside-triphosphatase activity;nucleotide binding;purine nucleotide binding;purine ribonucleoside triphosphate binding;purine ribonucleotide binding;pyrophosphatase activity;ribonucleotide binding
P60123;A0A0G2K0H9	P60123	RuvB-like 1	Ruvbl1	Ruvbl1	cellular macromolecule metabolic process	cell part;cytoplasmic part;intracellular organelle;intracellular organelle part;intracellular part;macromolecular complex;nuclear part;organelle part;protein complex;ribonucleoprotein complex	adenyl nucleotide binding;adenyl ribonucleotide binding;ATP binding;ATPase activity;hydrolase activity, acting on acid anhydrides;hydrolase activity, acting on acid anhydrides, in phosphorus-containing anhydrides;nucleoside-triphosphatase activity;nucleotide binding;purine nucleotide binding;purine ribonucleoside triphosphate binding;purine ribonucleotide binding;pyrophosphatase activity;ribonucl…
P61354;D3ZTK5;M0R7P0	P61354;D3ZTK5;M0R7P0	60S ribosomal protein L27	Rpl27;RGD1563835;LOC100912027	LOC100912027;RGD1563835;Rpl27	cellular macromolecule metabolic process	cell part;cytoplasmic part;intracellular non-membrane-bounded organelle;intracellular organelle;intracellular organelle part;intracellular part;macromolecular complex;non-membrane-bounded organelle;organelle part;ribonucleoprotein complex;ribosome	structural constituent of ribosome	Ribosome
Q5D059;P61980;M0R9K1	Q5D059;P61980;M0R9K1	Heterogeneous nuclear ribonucleoprotein K	Hnrnpk;LOC100359916	Hnrnpk;LOC100359916	cellular macromolecule metabolic process	cell part;cytoskeletal part;intracellular non-membrane-bounded organelle;intracellular organelle;intracellular organelle part;intracellular part;macromolecular complex;non-membrane-bounded organelle;nuclear part;organelle part;protein complex;ribonucleoprotein complex	nucleic acid binding;RNA binding
P62138;A0A0G2JYS8;A0A0G2JVK2	P62138;A0A0G2JYS8	Serine/threonine-protein phosphatase PP1-alpha catalytic subunit	Ppp1ca	Ppp1ca	cellular macromolecule metabolic process	cell part;cytoplasmic part;intracellular non-membrane-bounded organelle;intracellular organelle;intracellular organelle part;intracellular part;macromolecular complex;non-membrane-bounded organelle;nuclear part;nucleolus;organelle part;protein complex
P62193	P62193	26S protease regulatory subunit 4	Psmc1	Psmc1	cellular macromolecule metabolic process	cell part;cytoplasmic part;intracellular organelle;intracellular organelle part;intracellular part;macromolecular complex;nuclear part;organelle part;protein complex	adenyl nucleotide binding;adenyl ribonucleotide binding;ATP binding;ATPase activity;hydrolase activity, acting on acid anhydrides;hydrolase activity, acting on acid anhydrides, in phosphorus-containing anhydrides;nucleoside-triphosphatase activity;nucleotide binding;purine nucleotide binding;purine ribonucleoside triphosphate binding;purine ribonucleotide binding;pyrophosphatase activity;ribonucl…
P62198	P62198	26S protease regulatory subunit 8	Psmc5	Psmc5	cellular macromolecule metabolic process	cell part;cytoplasmic part;intracellular organelle;intracellular organelle part;intracellular part;macromolecular complex;nuclear part;organelle part;protein complex	adenyl nucleotide binding;adenyl ribonucleotide binding;ATP binding;ATPase activity;hydrolase activity, acting on acid anhydrides;hydrolase activity, acting on acid anhydrides, in phosphorus-containing anhydrides;nucleoside-triphosphatase activity;nucleotide binding;purine nucleotide binding;purine ribonucleoside triphosphate binding;purine ribonucleotide binding;pyrophosphatase activity;ribonucl…
P62250;M0R8S7;M0R4I3	P62250	40S ribosomal protein S16	Rps16	LOC102548369;RGD1561137;Rps16	cellular macromolecule metabolic process	cell part;cytoplasmic part;intracellular non-membrane-bounded organelle;intracellular organelle;intracellular organelle part;intracellular part;macromolecular complex;non-membrane-bounded organelle;organelle part;ribonucleoprotein complex;ribosome	nucleic acid binding;RNA binding;structural constituent of ribosome	Ribosome
P62282	P62282	40S ribosomal protein S11	Rps11	Rps11	cellular macromolecule metabolic process	cell part;intracellular organelle part;intracellular part;macromolecular complex;organelle part;ribonucleoprotein complex	nucleic acid binding;RNA binding;structural constituent of ribosome	Ribosome
P63004	P63004	Platelet-activating factor acetylhydrolase IB subunit alpha	Pafah1b1	Pafah1b1		cell part;cytoplasmic part;cytoskeletal part;intracellular non-membrane-bounded organelle;intracellular organelle;intracellular organelle part;intracellular part;macromolecular complex;microtubule;non-membrane-bounded organelle;nuclear part;organelle part;protein complex
P63039	P63039	60 kDa heat shock protein, mitochondrial	Hspd1	Hspd1	cellular macromolecule metabolic process	cell part;cytoplasmic part;intracellular organelle;intracellular organelle part;intracellular part;macromolecular complex;organelle part;protein complex	adenyl nucleotide binding;adenyl ribonucleotide binding;ATP binding;nucleotide binding;purine nucleotide binding;purine ribonucleoside triphosphate binding;purine ribonucleotide binding;ribonucleotide binding
P82995;D3ZXC7	P82995	Heat shock protein HSP 90-alpha	Hsp90aa1	Hsp90aa1	cellular macromolecule metabolic process	cell part;cytoplasmic part;intracellular organelle;intracellular organelle part;intracellular part;macromolecular complex;nuclear part;organelle part;protein complex	adenyl nucleotide binding;adenyl ribonucleotide binding;ATP binding;ATPase activity;hydrolase activity, acting on acid anhydrides;hydrolase activity, acting on acid anhydrides, in phosphorus-containing anhydrides;nucleic acid binding;nucleoside-triphosphatase activity;nucleotide binding;purine nucleotide binding;purine ribonucleoside triphosphate binding;purine ribonucleotide binding;pyrophosphat…
P85515	P85515	Alpha-centractin	Actr1a	Actr1a		cell part;cytoplasmic part;cytoskeletal part;intracellular non-membrane-bounded organelle;intracellular organelle;intracellular organelle part;intracellular part;macromolecular complex;non-membrane-bounded organelle;organelle part;protein complex	adenyl nucleotide binding;adenyl ribonucleotide binding;ATP binding;nucleotide binding;purine nucleotide binding;purine ribonucleoside triphosphate binding;purine ribonucleotide binding;ribonucleotide binding
P97536;G3V7E8;D4AAI5;A0A0G2K139;Q9R0L4-3;Q9R0L4-2;Q9R0L4	P97536	Cullin-associated NEDD8-dissociated protein 1	Cand1	Cand1;Cand2	cellular macromolecule metabolic process	cell part;intracellular organelle;intracellular organelle part;intracellular part;macromolecular complex;nuclear part;organelle part;protein complex
Q04462;A0A0G2JVG2	Q04462	Valine--tRNA ligase	Vars	Vars	cellular macromolecule metabolic process	cell part;cytoplasmic part;intracellular organelle;intracellular part	adenyl nucleotide binding;adenyl ribonucleotide binding;ATP binding;nucleotide binding;purine nucleotide binding;purine ribonucleoside triphosphate binding;purine ribonucleotide binding;ribonucleotide binding
Q1JU68	Q1JU68	Eukaryotic translation initiation factor 3 subunit A	Eif3a	Eif3a		cell part;cytoplasmic part;intracellular non-membrane-bounded organelle;intracellular organelle;intracellular organelle part;intracellular part;macromolecular complex;non-membrane-bounded organelle;nuclear part;nucleolus;organelle part;protein complex;ribonucleoprotein complex	nucleic acid binding;RNA binding
Q2PQA9;A0A0G2K070;G3V6L4;F1M8F2;A0A0G2K0Q2;P56536	Q2PQA9	Kinesin-1 heavy chain	Kif5b	Kif5a;Kif5b;Kif5c		cell part;cytoplasmic part;cytoskeletal part;intracellular organelle;intracellular organelle part;intracellular part;macromolecular complex;microtubule;organelle part;protein complex	adenyl nucleotide binding;adenyl ribonucleotide binding;ATP binding;ATPase activity;hydrolase activity, acting on acid anhydrides;hydrolase activity, acting on acid anhydrides, in phosphorus-containing anhydrides;nucleoside-triphosphatase activity;nucleotide binding;purine nucleotide binding;purine ribonucleoside triphosphate binding;purine ribonucleotide binding;pyrophosphatase activity;ribonucl…
Q3KRE8	Q3KRE8	Tubulin beta-2B chain	Tubb2b	Tubb2b		cell part;cytoskeletal part;intracellular organelle;intracellular organelle part;intracellular part;macromolecular complex;microtubule;organelle part;protein complex	hydrolase activity, acting on acid anhydrides;hydrolase activity, acting on acid anhydrides, in phosphorus-containing anhydrides;nucleoside-triphosphatase activity;nucleotide binding;purine nucleotide binding;purine ribonucleoside triphosphate binding;purine ribonucleotide binding;pyrophosphatase activity;ribonucleotide binding
Q3KRF2;Q9Z1A6;Q6P513	Q3KRF2;Q9Z1A6	Vigilin	Hdlbp	Hdlbp		cell part;intracellular organelle;intracellular part;macromolecular complex	nucleic acid binding;RNA binding
Q3ZB99	Q3ZB99		Tjp2	Tjp2		cell part;intracellular part
Q4FZT9	Q4FZT9	26S proteasome non-ATPase regulatory subunit 2	Psmd2	Psmd2		cell part;intracellular part;macromolecular complex;protein complex
Q4G061	Q4G061	Eukaryotic translation initiation factor 3 subunit B	Eif3b	Eif3b		cell part;cytoplasmic part;intracellular organelle part;intracellular part;macromolecular complex;nuclear part;organelle part;protein complex;ribonucleoprotein complex	nucleic acid binding;nucleotide binding;RNA binding
Q566E4	Q566E4		Hnrnpr	Hnrnpr		cell part;intracellular part;macromolecular complex;ribonucleoprotein complex	nucleic acid binding;nucleotide binding
Q5PPJ6	Q5PPJ6		Lars	Lars	cellular macromolecule metabolic process	cell part;cytoplasmic part;intracellular organelle;intracellular part	adenyl nucleotide binding;adenyl ribonucleotide binding;ATP binding;nucleotide binding;purine nucleotide binding;purine ribonucleoside triphosphate binding;purine ribonucleotide binding;ribonucleotide binding
Q5U2S7	Q5U2S7		Psmd3	Psmd3	cellular macromolecule metabolic process	cell part;intracellular organelle part;intracellular part;macromolecular complex;nuclear part;organelle part;protein complex
Q5U302;A0A0G2JYF7;A0A0G2JY03;REV__Q5XHX8-2;REV__Q5XHX8;D4A6H8;F1M4I1	Q5U302;A0A0G2JYF7		Ctnna1	Ctnna1;Ctnna2;Ctnna3		cell part;cytoplasmic part;intracellular non-membrane-bounded organelle;intracellular organelle;intracellular part;macromolecular complex;non-membrane-bounded organelle;protein complex
Q5XIC6	Q5XIC6		Psmd12	Psmd12		cell part;intracellular part;macromolecular complex;protein complex
Q5XIM9	Q5XIM9	T-complex protein 1 subunit beta	Cct2	Cct2	cellular macromolecule metabolic process	cell part;cytoplasmic part;cytoskeletal part;intracellular organelle part;intracellular part;macromolecular complex;microtubule;organelle part;protein complex	adenyl nucleotide binding;adenyl ribonucleotide binding;ATP binding;nucleotide binding;purine nucleotide binding;purine ribonucleoside triphosphate binding;purine ribonucleotide binding;ribonucleotide binding
Q6P6U2;Q63569	Q6P6U2;Q63569	26S protease regulatory subunit 6A	Psmc3	Psmc3	cellular macromolecule metabolic process	cell part;cytoplasmic part;intracellular non-membrane-bounded organelle;intracellular organelle;intracellular organelle part;intracellular part;macromolecular complex;non-membrane-bounded organelle;nuclear part;organelle part;protein complex;ribonucleoprotein complex	adenyl nucleotide binding;adenyl ribonucleotide binding;ATP binding;nucleotide binding;purine nucleotide binding;purine ribonucleoside triphosphate binding;purine ribonucleotide binding;ribonucleotide binding
Q63570	Q63570	26S protease regulatory subunit 6B	Psmc4	Psmc4	cellular macromolecule metabolic process	cell part;cytoplasmic part;intracellular organelle part;intracellular part;macromolecular complex;nuclear part;organelle part;protein complex	adenyl nucleotide binding;adenyl ribonucleotide binding;ATP binding;ATPase activity;hydrolase activity, acting on acid anhydrides;hydrolase activity, acting on acid anhydrides, in phosphorus-containing anhydrides;nucleoside-triphosphatase activity;nucleotide binding;purine nucleotide binding;purine ribonucleoside triphosphate binding;purine ribonucleotide binding;pyrophosphatase activity;ribonucl…
Q641Y8	Q641Y8	ATP-dependent RNA helicase DDX1	Ddx1	Ddx1	cellular macromolecule metabolic process	cell part;cytoplasmic part;intracellular non-membrane-bounded organelle;intracellular organelle;intracellular organelle part;intracellular part;macromolecular complex;non-membrane-bounded organelle;nuclear part;nucleolus;organelle part;protein complex;ribonucleoprotein complex	adenyl nucleotide binding;adenyl ribonucleotide binding;ATP binding;ATPase activity;hydrolase activity, acting on acid anhydrides;hydrolase activity, acting on acid anhydrides, in phosphorus-containing anhydrides;nucleic acid binding;nucleoside-triphosphatase activity;nucleotide binding;purine nucleotide binding;purine ribonucleoside triphosphate binding;purine ribonucleotide binding;pyrophosphat…
Q68FR6	Q68FR6	Elongation factor 1-gamma	Eef1g	Eef1g			nucleic acid binding;RNA binding
Q6P3V9;P50878	Q6P3V9;P50878	60S ribosomal protein L4	Rpl4	Rpl4	cellular macromolecule metabolic process	cell part;cytoplasmic part;intracellular non-membrane-bounded organelle;intracellular organelle;intracellular organelle part;intracellular part;macromolecular complex;non-membrane-bounded organelle;organelle part;ribonucleoprotein complex;ribosome	structural constituent of ribosome	Ribosome
Q6P502	Q6P502	T-complex protein 1 subunit gamma	Cct3	Cct3	cellular macromolecule metabolic process	cell part;cytoplasmic part;intracellular part;macromolecular complex;protein complex	adenyl nucleotide binding;adenyl ribonucleotide binding;ATP binding;nucleotide binding;purine nucleotide binding;purine ribonucleoside triphosphate binding;purine ribonucleotide binding;ribonucleotide binding
Q6P685	Q6P685		Eif2s2	Eif2s2			nucleic acid binding;RNA binding
Q6PCT9	Q6PCT9		Psmd6	Psmd6	cellular macromolecule metabolic process	cell part;intracellular part;macromolecular complex;protein complex
Q6S3A0;Q6S399;Q6S3A3;Q6S3A4;F7F9U6;Q6S395;Q6S396;Q6S3A5;P30427;A0A0G2K1J5;P30427-3;P30427-2;P30427-4	Q6S3A0;Q6S399;Q6S3A3;Q6S3A4;F7F9U6;Q6S395;Q6S396;Q6S3A5;P30427;A0A0G2K1J5;P30427-3;P30427-2;P30427-4	Plectin	Plec	Plec		cell part;cytoplasmic part;intracellular non-membrane-bounded organelle;intracellular organelle;intracellular part;non-membrane-bounded organelle;organelle part
Q6TUG0	Q6TUG0	DnaJ homolog subfamily B member 11	Dnajb11	Dnajb11	cellular macromolecule metabolic process	cell part;cytoplasmic part;intracellular organelle;intracellular organelle part;intracellular part;macromolecular complex;organelle part;protein complex
Q7TPB1	Q7TPB1	T-complex protein 1 subunit delta	Cct4	Cct4	cellular macromolecule metabolic process	cell part;cytoplasmic part;cytoskeletal part;intracellular non-membrane-bounded organelle;intracellular organelle;intracellular organelle part;intracellular part;macromolecular complex;microtubule;non-membrane-bounded organelle;nuclear part;organelle part;protein complex	adenyl nucleotide binding;adenyl ribonucleotide binding;ATP binding;nucleotide binding;purine nucleotide binding;purine ribonucleoside triphosphate binding;purine ribonucleotide binding;ribonucleotide binding
Q91Y81	Q91Y81	Septin-2	2016-09-02	Septin-2		cell part;cytoplasmic part;cytoskeletal part;intracellular non-membrane-bounded organelle;intracellular organelle;intracellular organelle part;intracellular part;macromolecular complex;non-membrane-bounded organelle;nuclear part;nucleolus;organelle part;protein complex	hydrolase activity, acting on acid anhydrides;hydrolase activity, acting on acid anhydrides, in phosphorus-containing anhydrides;nucleoside-triphosphatase activity;nucleotide binding;purine nucleotide binding;purine ribonucleoside triphosphate binding;purine ribonucleotide binding;pyrophosphatase activity;ribonucleotide binding
Q9EST6;F1LP34	Q9EST6;F1LP34	Acidic leucine-rich nuclear phosphoprotein 32 family member B	Anp32b	Anp32b		cell part;intracellular non-membrane-bounded organelle;intracellular organelle;intracellular organelle part;intracellular part;non-membrane-bounded organelle;nuclear part;nucleolus;organelle part
Q9QZR6-2;Q9QZR6;Q9QZR6-4;Q9QZR6-3	Q9QZR6-2;Q9QZR6;Q9QZR6-4;Q9QZR6-3	Septin-9	2016-09-09	Septin-9		cell part;intracellular non-membrane-bounded organelle;intracellular organelle;intracellular part;non-membrane-bounded organelle	nucleotide binding;purine nucleotide binding;purine ribonucleoside triphosphate binding;purine ribonucleotide binding;ribonucleotide binding

## Sheet: Feuil2
Cluster ID	Type	Name	P value	Enrichment	Total	In cluster	Cluster size	Ben. Ho. FDR
226	GOCC name	macromolecular complex	5.2816e-19	1.4189	99	90	107	1.9911e-16
226	GOCC name	intracellular part	7.2901e-13	1.1817	140	106	107	1.3742e-10
226	GOCC name	protein complex	1.7197e-10	1.409	72	65	107	2.161e-08
226	GOCC name	non-membrane-bounded organelle	4.8687e-09	1.4493	56	52	107	3.671e-07
226	GOCC name	cell part	6.1147e-09	1.1254	147	106	107	3.8421e-07
226	GOCC name	intracellular non-membrane-bounded organelle	4.8687e-09	1.4493	56	52	107	4.5887e-07
226	GOCC name	organelle part	1.4337e-08	1.3006	90	75	107	6.7565e-07
226	GOCC name	intracellular organelle part	1.6173e-08	1.3096	87	73	107	6.7748e-07
226	GOCC name	ribonucleoprotein complex	2.4376e-07	1.5174	36	35	107	8.3543e-06
226	GOCC name	nuclear part	2.031e-06	1.4764	37	35	107	6.3808e-05
226	GOCC name	cytoplasmic part	1.0539e-05	1.1926	106	81	107	0.0002838
226	GOCC name	intracellular organelle	1.4203e-05	1.185	108	82	107	0.00035697
226	GOMF name	ribonucleotide binding	3.4477e-06	1.474	36	34	107	0.00038183
226	GOMF name	purine ribonucleotide binding	3.4477e-06	1.474	36	34	107	0.00050911
226	GOMF name	purine ribonucleoside triphosphate binding	3.4477e-06	1.474	36	34	107	0.00076366
226	GOMF name	purine nucleotide binding	2.031e-06	1.4764	37	35	107	0.00089974
226	GOMF name	pyrophosphatase activity	3.9562e-05	1.5607	21	21	107	0.0014605
226	GOMF name	nucleotide binding	1.7685e-05	1.3873	45	40	107	0.0015669
226	GOMF name	nucleoside-triphosphatase activity	3.9562e-05	1.5607	21	21	107	0.0015933
226	GOMF name	hydrolase activity, acting on acid anhydrides, in phosphorus-containing anhydrides	3.9562e-05	1.5607	21	21	107	0.0017526
226	GOMF name	hydrolase activity, acting on acid anhydrides	3.9562e-05	1.5607	21	21	107	0.0019473
226	GOMF name	nucleic acid binding	7.0385e-05	1.4567	30	28	107	0.0023985
226	GOMF name	RNA binding	8.3588e-05	1.4983	25	24	107	0.0026449
226	GOMF name	structural constituent of ribosome	0.00011242	1.5607	19	19	107	0.0033202
226	KEGG name	Ribosome	3.9562e-05	1.5607	21	21	107	0.0039562
226	GOMF name	adenyl nucleotide binding	0.00018105	1.4493	28	26	107	0.0050129
226	GOMF name	ATP binding	0.00028703	1.4451	27	25	107	0.0070642
226	GOMF name	adenyl ribonucleotide binding	0.00028703	1.4451	27	25	107	0.0074797
226	GOCC name	ribosome	0.00052051	1.5607	16	16	107	0.010328
226	GOBP name	cellular macromolecule metabolic process	5.2492e-06	1.3083	68	57	107	0.011627
226	GOCC name	cytoskeletal part	0.00073028	1.3993	29	26	107	0.013766
226	GOCC name	nucleolus	0.00085998	1.5607	15	15	107	0.015439
226	GOMF name	ATPase activity	0.0014148	1.5607	14	14	107	0.02507
226	GOCC name	microtubule	0.0023179	1.5607	13	13	107	0.03972
