# Supplementary material for: The Brain Origin of Neonatal Microglia Determines the Content of Exosomes and Biological Function
Source: Preprints.org preprint supplement (doi:10.20944/preprints201907.0102.v1), 2019-07-08
Supplement: Supplementary file 8 [file Supplementary data 14.xlsx]

## Sheet: Feuil1
Protein IDs	Majority protein IDs	Protein names	Gene names	Gene name	GOCC name
F1LQ63;A0A096MJE6;Q05546;Q05546-2	F1LQ63;A0A096MJE6;Q05546;Q05546-2	Tenascin-R	Tnr	Tnr
A0A0G2K013;Q9QXQ0;A0A0G2K5U9;Q8R4I6	A0A0G2K013;Q9QXQ0;A0A0G2K5U9	Alpha-actinin-4	Actn4	Actn3;Actn4
A0A0G2K151;P02650	A0A0G2K151;P02650	Apolipoprotein E	Apoe	Apoe
G3V9G4;A0A0G2K5E7;G3V888;P16638-2;P16638	G3V9G4;A0A0G2K5E7;G3V888;P16638-2;P16638	ATP-citrate synthase	Acly	Acly
A0A0G2K8G8;A0A0G2K4X1;Q6MGB8;D3ZQG9;A0A0G2K4S5	A0A0G2K8G8;A0A0G2K4X1;Q6MGB8;D3ZQG9;A0A0G2K4S5		RT1-A2;RT1-CE2	RT1-A2;RT1-CE2
A0A0H2UHM5;P11598	A0A0H2UHM5;P11598	Protein disulfide-isomerase A3	Pdia3	Pdia3	endoplasmic reticulum part
B1H216;P01946;A0A0G2JSV6;Q63910;G3V8R3	B1H216;P01946;A0A0G2JSV6	Hemoglobin subunit alpha-1/2	Hba1	Hba1;Hbz;LOC287167
B1WBM0;P40241	B1WBM0;P40241	Tetraspanin;CD9 antigen	Cd9	Cd9
B1WC34	B1WC34		Prkcsh	Prkcsh
B5DEN4;P04642;H9N9H4;Q6AYX2;P19629	B5DEN4;P04642	L-lactate dehydrogenase;L-lactate dehydrogenase A chain	Ldha	Ldha;Ldhc;LDHC
D3ZAN3	D3ZAN3		Ganab	Ganab	endoplasmic reticulum part
D4A409	D4A409		Lama1	Lama1
F1LMY3;Q62656-3;Q62656;Q62656-2	F1LMY3;Q62656-3;Q62656;Q62656-2	Protein-tyrosine-phosphatase;Receptor-type tyrosine-protein phosphatase zeta	Ptprz1	Ptprz1
F1LR87;Q6AXR4	F1LR87;Q6AXR4	Beta-hexosaminidase subunit beta	Hexb	Hexb
F1LS79;Q00657	F1LS79;Q00657	Chondroitin sulfate proteoglycan 4	Cspg4	Cspg4
F1LVK3	F1LVK3		Chadl	Chadl
F1MAN8	F1MAN8		Lama5	Lama5
G3V6S3;Q3MID6;O35783	G3V6S3;Q3MID6		Calu	Calu	endoplasmic reticulum part
G3V7X5;P24054	G3V7X5;P24054	SPARC-like protein 1	Sparcl1	Sparcl1
G3V836;P05371;A0A0G2KB42	G3V836;P05371	Clusterin;Clusterin;Clusterin beta chain;Clusterin alpha chain	Clu	Clu
G3V8G4;P55068;P55068-2;A0A0G2JYH8	G3V8G4;P55068;P55068-2;A0A0G2JYH8	Brevican core protein	Bcan	Bcan
M0R9G2;P06238;D4AA52;A0A0G2K926;P14046;G3V9J1;M0R5V7;A0A0G2K625;Q6IE52	M0R9G2;P06238	Alpha-2-macroglobulin	LOC100911545;A2m	A1i3;A2m;Cpamd8;LOC100911545;LOC297568;Mug2
P04785	P04785	Protein disulfide-isomerase	P4hb	P4hb	endoplasmic reticulum part
P12843	P12843	Insulin-like growth factor-binding protein 2	Igfbp2	Igfbp2
P15087	P15087	Carboxypeptidase E	Cpe	Cpe
P42123	P42123	L-lactate dehydrogenase B chain	Ldhb	Ldhb
P48500;A0A0G2JWJ4;A0A0G2JWU1	P48500;A0A0G2JWJ4;A0A0G2JWU1	Triosephosphate isomerase	Tpi1	Tpi1
P50399;P50398	P50399	Rab GDP dissociation inhibitor beta	Gdi2	Gdi1;Gdi2
Q5M7T7	Q5M7T7		Pla2g7	Pla2g7
Q5U367	Q5U367	Procollagen-lysine,2-oxoglutarate 5-dioxygenase 3	Plod3	Plod3	endoplasmic reticulum part
Q6P136;Q63617	Q6P136;Q63617	Hypoxia up-regulated protein 1	Hyou1	Hyou1	endoplasmic reticulum part
Q6AYE5	Q6AYE5	Out at first protein homolog	Oaf	Oaf
Q6AYS3	Q6AYS3		Ctsa	Ctsa
Q6Q0N0	Q6Q0N0	Calsyntenin-1;Soluble Alc-alpha;CTF1-alpha	Clstn1	Clstn1	endoplasmic reticulum part

## Sheet: Feuil2
Cluster ID	Type	Name	P value	Enrichment	Total	In cluster	Cluster size	Ben. Ho. FDR
230	GOCC name	endoplasmic reticulum part	6.1528e-05	4.8382	10	7	34	0.025595
