# Supplementary material for: The Brain Origin of Neonatal Microglia Determines the Content of Exosomes and Biological Function
Source: Preprints.org preprint supplement (doi:10.20944/preprints201907.0102.v1), 2019-07-08
Supplement: Supplementary file 9 [file Supplementary data 15.docx]

**Supplementary data 15**


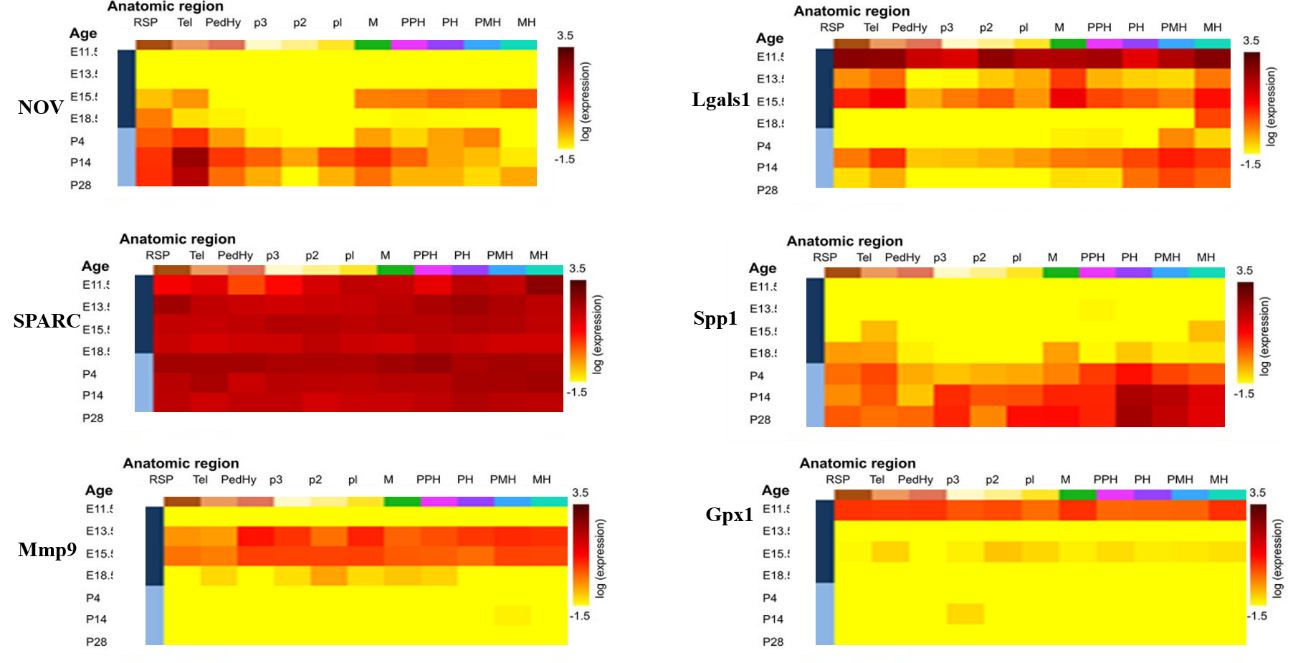


**Supplementary data 15**. Spatio-temporal expression of developmental microglia gene markers from Brain Atlas (<http://developingmouse.brain-map.org/>)
