# Supplementary material for: The Brain Origin of Neonatal Microglia Determines the Content of Exosomes and Biological Function
Source: Preprints.org preprint supplement (doi:10.20944/preprints201907.0102.v1), 2019-07-08
Supplement: Supplementary file 10 [file Supplementary data 2.xlsx]

## Sheet: Sheet1
LFQ intensity cortex_control_i5	LFQ intensity cortex_control_i9	LFQ intensity cortex_LPS_i5	LFQ intensity cortex_LPS_i9	LFQ intensity Spinal_cord_control_i5	LFQ intensity Spinal_cord_control_i9	LFQ intensity Spinal_cord_LPS_i5	LFQ intensity Spinal_cord_LPS_i9	C: Only identified by site	C: Reverse	C: Potential contaminant	N: Peptides	N: Razor + unique peptides	N: Unique peptides	N: Sequence coverage [%]	N: Unique + razor sequence coverage [%]	N: Unique sequence coverage [%]	N: Mol. weight [kDa]	N: Q-value	N: Score	N: Intensity	N: MS/MS count	T: Protein IDs	T: Majority protein IDs	T: Protein names	T: Gene names
NaN	NaN	NaN	NaN	NaN	NaN	NaN	NaN	Mol. weight [kDa]	Sequence length	Sequence lengths	2	2	2	4.2	4.2	4.2	56.781	0	2.6379	NaN	NaN	A0FKI7	A0FKI7	Acyl-CoA-binding domain-containing protein 5	Acbd5
27.3703	NaN	26.1514	NaN	NaN	NaN	25.6543	NaN				6	6	6	12.3	12.3	12.3	66.215	0	19.06	350850000	11	A0A0G2K0D3	A0A0G2K0D3
NaN	NaN	NaN	NaN	24.7641	NaN	NaN	NaN				2	2	2	3.4	3.4	3.4	84.943	0.0010204	0.63717	104180000	2	A0A0G2KBC9;C0HJX3;C0HJX2	A0A0G2KBC9;C0HJX3;C0HJX2
25.3396	NaN	25.0426	NaN	NaN	NaN	NaN	NaN				2	2	2	4.2	4.2	4.2	56.781	0	2.6379	145810000	3	A0FKI7	A0FKI7	Acyl-CoA-binding domain-containing protein 5	Acbd5
29.6644	28.3381	29.7297	28.3064	27.8704	26.7934	28.7147	NaN				12	12	12	42.9	42.9	42.9	44.535	0	33.094	2298700000	28	A0JPJ7	A0JPJ7	Obg-like ATPase 1	Ola1
27.1218	26.6132	26.978	NaN	26.2575	NaN	26.6559	NaN				3	3	3	16.6	16.6	16.6	29.187	0	15.237	436320000	4	A0JPM9	A0JPM9	Eukaryotic translation initiation factor 3 subunit J	Eif3j
25.7089	25.9134	25.7626	25.9097	25.7209	NaN	NaN	NaN				2	2	2	10.2	10.2	10.2	22.326	0	2.073	197390000	6	A0JPP1	A0JPP1	Dr1-associated corepressor	Drap1
27.4456	27.933	27.5067	27.9667	28.6192	NaN	27.9508	NaN				8	8	8	25.4	25.4	25.4	44.874	0	12.462	923150000	28	A0JPQ9	A0JPQ9	Chitinase domain-containing protein 1	Chid1
26.9942	28.6317	27.5537	27.4643	27.4426	27.5766	27.3437	26.693				5	5	5	8.5	8.5	8.5	71.445	0	2.8939	790010000	5	A0MZ67	A0MZ67	Shootin-1
24.9907	NaN	24.9343	NaN	NaN	NaN	NaN	NaN				3	3	3	12.6	12.6	12.6	41.028	0	3.0655	96458000	3	A1A5P0	A1A5P0	Cdc42 effector protein 1	Cdc42ep1
26.2679	NaN	25.4145	NaN	25.2748	NaN	24.8111	NaN				3	3	3	7.2	7.2	7.2	45.55	0	3.7963	147230000	5	A1A5R1	A1A5R1	RNA binding protein fox-1 homolog 2	Rbfox2
26.9257	27.2594	26.8195	27.4368	27.9717	NaN	27.0866	27.3585				13	13	13	15.3	15.3	15.3	106.76	0	21.873	607880000	21	A1A5S1	A1A5S1	Pre-mRNA-processing factor 6	Prpf6
25.6359	NaN	26.0247	NaN	NaN	NaN	25.8151	NaN				4	4	4	45.8	45.8	45.8	17.01	0	6.4043	264630000	4	A1L108	A1L108	Actin-related protein 2/3 complex subunit 5-like protein	Arpc5l
24.847	25.3389	24.5439	27.0356	24.89	NaN	24.9532	NaN				3	3	3	9.3	9.3	9.3	46.199	0	6.4844	120980000	5	A1L134	A1L134	Ancient ubiquitous protein 1	Aup1
25.3399	NaN	NaN	NaN	NaN	NaN	24.9932	NaN				2	2	2	2.9	2.9	2.9	65.512	0.0024558	0.10983	71225000	2	A1L1I3;Q2LC84	A1L1I3;Q2LC84	Numb-like protein;Protein numb homolog	Numbl;Numb
26.5551	NaN	26.5723	NaN	NaN	NaN	NaN	NaN				4	4	4	6.8	6.8	6.8	80.253	0	24.781	332520000	6	A1L1J9	A1L1J9	Lipase maturation factor 2	Lmf2
24.6209	NaN	24.7623	NaN	NaN	NaN	NaN	NaN				3	3	3	4.5	4.5	4.5	81.738	0	6.047	94901000	4	A1L1K3	A1L1K3	Anaphase-promoting complex subunit 5	Anapc5
26.2129	NaN	26.4249	NaN	25.6663	NaN	25.6692	NaN				5	5	5	10.7	10.7	10.7	76.565	0	9.1384	266900000	8	A1L1L2	A1L1L2	Transmembrane protein 214	Tmem214
28.3652	27.1125	28.5011	27.7331	27.1344	25.4254	28.0352	NaN				13	13	13	26.8	26.8	26.8	84.071	0	75.076	1248600000	39	A2RRU1	A2RRU1	Glycogen [starch] synthase, muscle	Gys1
NaN	NaN	NaN	NaN	NaN	NaN	25.237	NaN				2	2	2	9.9	9.9	9.9	30.314	0.0010076	0.50614	189720000	2	A2RUW1	A2RUW1	Toll-interacting protein	Tollip
25.9872	NaN	26.0955	NaN	NaN	NaN	25.2876	NaN				3	3	3	16.2	16.2	16.2	31.224	0	10.696	217020000	6	A2VCX1	A2VCX1	TIP41-like protein	Tiprl
27.98	NaN	28.4802	25.0906	26.767	NaN	27.0677	NaN				9	9	9	20.6	20.6	20.6	80.275	0	32.447	1055800000	16	A2VD12	A2VD12	Pre-B-cell leukemia transcription factor-interacting protein 1	Pbxip1
25.2455	25.4127	25.1869	25.3521	25.0749	NaN	25.0741	NaN				5	5	5	4.1	4.1	4.1	150.28	0	4.4032	153060000	9	A4L9P7	A4L9P7	Sister chromatid cohesion protein PDS5 homolog A	Pds5a
29.1564	31.3386	28.8455	31.7721	30.0888	30.3828	30.7377	30.7124				15	15	15	33.2	33.2	33.2	59.573	0	53.001	4337600000	80	A7E3N2	A7E3N2	Neutrophil cytosol factor 2	Ncf2
32.4939	32.3886	32.9011	32.1257	32.8377	32.2588	32.5612	32.6646				16	16	16	47.6	47.6	47.6	37.477	0	193.05	30241000000	136	A7VJC2	A7VJC2	Heterogeneous nuclear ribonucleoproteins A2/B1	Hnrnpa2b1
34.5798	32.9481	34.2411	33.5917	29.3167	29.1064	34.4981	29.6633				4	4	2	32.6	32.6	25.6	14.045	0	20.296	56286000000	44	A9UMV8;Q64598;Q4FZT6;Q00728;P0CC09;P0C170;P0C169;P02262	A9UMV8;Q64598;Q4FZT6;Q00728;P0CC09;P0C170;P0C169;P02262	Histone H2A.J;Histone H2A type 1-F;Histone H2A type 3;Histone H2A type 4;Histone H2A type 2-A;Histone H2A type 1-E;Histone H2A type 1-C;Histone H2A type 1	H2afj;Hist2h2aa3
25.1027	25.8324	26.1933	25.2947	24.7409	NaN	24.9478	NaN				2	2	2	16.9	16.9	16.9	16.58	0	85.707	241110000	10	B0BN18	B0BN18	Prefoldin subunit 2	Pfdn2
28.0819	28.5002	28.6885	28.4444	28.3583	27.7684	28.1967	NaN				12	12	12	37.2	37.2	37.2	38.09	0	23.366	1520600000	24	B0BN85	B0BN85	Suppressor of G2 allele of SKP1 homolog	Sugt1
30.5034	30.1396	31.1817	30.9792	31.1612	29.709	30.52	30.5596				17	17	17	51.9	51.9	51.9	42.817	0	38.583	5977700000	56	B0BN93	B0BN93	26S proteasome non-ATPase regulatory subunit 13	Psmd13
31.85	33.2197	31.9288	32.9806	32.985	33.1876	32.1928	33.3061				9	9	9	69.7	69.7	69.7	15.932	0	120.47	20147000000	99	B0BNA5	B0BNA5	Coactosin-like protein	Cotl1
28.2807	29.4223	28.8298	29.2797	29.5493	29.5196	28.8382	29.9178				11	11	11	50.8	50.8	50.8	36.46	0	105.24	2170900000	36	B0BNA7	B0BNA7	Eukaryotic translation initiation factor 3 subunit I	Eif3i
27.3234	27.4989	27.4458	27.3641	NaN	NaN	27.3253	NaN				6	6	6	30	30	30	24.57	0	4.1043	587680000	11	B0BNE2	B0BNE2	DNA-directed RNA polymerases I, II, and III subunit RPABC1	Polr2e
28.9763	28.2873	29.196	28.0895	28.5966	NaN	28.3239	NaN				8	8	8	46.8	46.8	46.8	31.363	0	69.255	2091600000	28	B0BNE5	B0BNE5	S-formylglutathione hydrolase	Esd
NaN	NaN	26.6695	NaN	NaN	NaN	NaN	NaN				5	3	3	14.3	8.1	8.1	51.251	0	5.8453	284960000	6	B0BNF1	B0BNF1	Septin-8	2018-09-08
27.491	28.0808	27.3157	28.3528	28.0335	27.6697	27.5497	27.7183				6	6	6	26.6	26.6	26.6	34.869	0	19.639	826120000	15	B0BNG0	B0BNG0	ER membrane protein complex subunit 2	Emc2
26.8926	25.0316	26.9475	25.0182	23.7004	NaN	25.3377	NaN				3	3	3	16.3	16.3	16.3	30.89	0	5.6711	359800000	12	B0BNM1	B0BNM1	NAD(P)H-hydrate epimerase	Apoa1bp
NaN	NaN	NaN	NaN	NaN	NaN	24.4873	NaN				2	2	2	12.9	12.9	12.9	23.703	0	4.3265	96738000	3	B0BNM9	B0BNM9	Glycolipid transfer protein	GLTP
27.7788	28.8982	27.8263	29.216	28.4358	29.0705	28.4341	NaN				3	3	3	34.3	34.3	34.3	12.097	0	11.912	1277400000	16	B0K020	B0K020	CDGSH iron-sulfur domain-containing protein 1	Cisd1
29.0152	NaN	28.4493	NaN	NaN	NaN	27.5464	NaN				2	2	2	12.8	12.8	12.8	16.815	0	5.6443	1311600000	12	B0K025	B0K025	Oligosaccharyltransferase complex subunit OSTC	Ostc
26.49	27.1973	26.3748	26.733	25.9008	NaN	26.297	NaN				5	5	5	14.6	14.6	14.6	47.989	0	6.2679	425330000	13	B0LT89	B0LT89	Serine/threonine-protein kinase 24;Serine/threonine-protein kinase 24 35 kDa subunit;Serine/threonine-protein kinase 24 12 kDa subunit	Stk24
29.6379	30.4962	29.6686	29.8571	30.6971	29.3699	29.9252	30.2617				15	15	15	42.6	42.6	42.6	46.793	0	30.248	3123200000	59	B1H267	B1H267	Sorting nexin-5	Snx5
26.0375	NaN	NaN	NaN	NaN	NaN	NaN	NaN				3	3	3	13.4	13.4	13.4	33.421	0	10.05	177660000	3	B1WBW4	B1WBW4	Armadillo repeat-containing protein 10	Armc10
29.1096	29.275	29.4638	29.3594	28.9098	NaN	29.1224	NaN				18	18	18	17.4	17.4	17.4	137.68	0	37.994	1979400000	46	B2GUV7	B2GUV7	Eukaryotic translation initiation factor 5B	Eif5b
25.1599	NaN	25.5605	25.853	NaN	NaN	24.4858	NaN				4	4	4	5.1	5.1	5.1	108.37	0	4.6936	158170000	6	B2GUZ1	B2GUZ1	Ubiquitin carboxyl-terminal hydrolase 4	Usp4
30.2682	30.4156	30.1402	30.8337	28.2372	29.1463	30.0535	30.1044				12	10	10	70.3	60.8	60.8	32.909	0	89.663	4448300000	98	B2GUZ5	B2GUZ5	F-actin-capping protein subunit alpha-1	Capza1
28.6187	28.3183	29.118	27.9502	28.1145	28.346	27.4404	NaN				9	9	9	23.5	23.5	23.5	56.203	0	26.45	1309400000	22	B2GV06	B2GV06	Succinyl-CoA:3-ketoacid coenzyme A transferase 1, mitochondrial	Oxct1
26.2838	26.4029	26.5618	26.3227	26.4705	NaN	26.0244	NaN				5	5	5	6.7	6.7	6.7	89.584	0	9.9992	397200000	10	B2GV24	B2GV24	E3 UFM1-protein ligase 1	Ufl1
28.28	29.8205	29.5693	30.7933	28.957	NaN	30.1706	NaN				10	10	10	32.6	32.6	32.6	45.821	0	32.937	3267500000	47	B2GV54	B2GV54	Neutral cholesterol ester hydrolase 1	Nceh1
NaN	26.0887	NaN	26.4334	NaN	NaN	NaN	NaN				3	3	3	3.9	3.9	3.9	80.733	0.008916	-0.64557	176740000	4	B2GV87	B2GV87	Receptor-type tyrosine-protein phosphatase epsilon	Ptpre
25.875	26.3053	25.875	26.0066	25.687	NaN	26.213	NaN				4	4	4	9.7	9.7	9.7	51.326	0	5.012	281480000	8	B2RYF7	B2RYF7	WAS protein family homolog 1	Wash1
29.7373	29.178	29.3184	29.167	29.384	28.7941	29.0279	NaN				11	11	11	51.3	51.3	51.3	31.27	0	74.5	3354900000	48	B2RYG6	B2RYG6	Ubiquitin thioesterase OTUB1	Otub1
24.1684	NaN	24.1296	NaN	NaN	NaN	NaN	NaN				3	3	3	5.2	5.2	5.2	83.145	0.0005385	1.5093	108520000	5	B2RYI0	B2RYI0	WD repeat-containing protein 91	Wdr91
NaN	NaN	27.4227	NaN	NaN	NaN	NaN	NaN				3	3	3	10.4	10.4	10.4	35.816	0	7.0787	733940000	4	B2RYJ4	B2RYJ4	L-aminoadipate-semialdehyde dehydrogenase-phosphopantetheinyl transferase	Aasdhppt
NaN	NaN	NaN	25.7445	NaN	NaN	NaN	NaN				3	3	3	10.7	10.7	10.7	33.015	0	5.3315	115190000	4	B2RYM5	B2RYM5	Lys-63-specific deubiquitinase BRCC36	Brcc3
29.799	29.7116	30.0434	29.4408	30.0169	29.4566	29.8058	30.5106				4	4	4	15.9	15.9	15.9	21.431	0	17.371	1658900000	21	B2RZ37	B2RZ37	Receptor expression-enhancing protein 5	Reep5
29.326	30.2994	28.9219	30.0889	29.2115	NaN	29.1734	NaN				4	4	4	24.7	24.7	24.7	20.468	0	22.672	2529600000	31	B2RZ78	B2RZ78	Vacuolar protein sorting-associated protein 29	Vps29
27.0577	26.9172	27.4249	NaN	27.5222	NaN	26.8628	NaN				9	9	9	13.6	13.6	13.6	87.37	0	6.4082	628630000	15	B3DMA2	B3DMA2	Acyl-CoA dehydrogenase family member 11	Acad11
31.3846	29.666	31.056	29.6858	31.2484	29.4609	30.6813	30.0479				16	16	14	47.3	47.3	41.1	49.694	0	99.474	8424600000	81	B3GNI6	B3GNI6	Septin-11	2018-09-11
30.6239	28.8328	31.2636	30.4392	30.2148	26.485	30.2435	28.8895				21	21	21	36.3	36.3	36.3	84.73	0	246.48	7178500000	80	B4F7E8	B4F7E8	Niban-like protein 1	Fam129b
NaN	NaN	27.1828	30.0407	NaN	NaN	28.4927	28.9531				8	8	8	16.1	16.1	16.1	71.693	0	56.732	858650000	23	B5D5N9	B5D5N9	Cationic amino acid transporter 2	Slc7a2
28.0494	28.1743	27.9474	28.4271	28.4688	28.245	28.2978	28.0831				6	6	6	21.2	21.2	21.2	37.71	0	26.666	1068700000	25	B5DEH2	B5DEH2	Erlin-2	Erlin2
25.1772	25.8962	25.0338	25.7733	NaN	NaN	NaN	NaN				2	2	2	10.5	10.5	10.5	26.11	0	4.0286	155830000	4	B5DEN9	B5DEN9	Vacuolar protein sorting-associated protein 28 homolog	Vps28
25.2291	25.9684	25.5584	25.9227	NaN	NaN	25.5981	NaN				3	3	3	33.6	33.6	33.6	14.677	0.0024498	0.073556	193290000	4	B5DF51	B5DF51	Membrane magnesium transporter 1	Mmgt1
28.1896	28.2647	28.5657	28.324	27.5948	NaN	28.0954	26.9349				19	19	19	27.5	27.5	27.5	88.931	0	21.623	1442100000	37	B5DF89	B5DF89	Cullin-3	Cul3
28.8511	28.2886	29.6822	27.736	27.0251	27.2159	28.1638	28.306				7	7	7	25.8	25.8	25.8	36.169	0	20.031	2075800000	25	B5DF91	B5DF91	ELAV-like protein	Elavl1
30.0299	30.1399	30.1133	30.4788	30.0814	28.7264	30.1229	28.9414				22	22	22	28.5	28.5	28.5	105.43	0	92.284	4812900000	92	B5DFC8	B5DFC8	Eukaryotic translation initiation factor 3 subunit C	Eif3c
29.158	29.173	28.8448	29.1117	29.3743	NaN	28.7789	29.1594				11	11	11	29.4	29.4	29.4	53.753	0	25.081	2396600000	38	B5DFN2	B5DFN2	Adenosylhomocysteinase	Ahcyl1
NaN	25.3055	NaN	25.6888	NaN	NaN	NaN	NaN				11	2	2	32	6.1	6.1	51.153	0.00052966	1.297	29580000	5	C9WPN6	C9WPN6		Eif2s3y
NaN	NaN	24.9888	NaN	NaN	NaN	NaN	NaN				2	2	2	3.7	3.7	3.7	72.488	0	8.5714	85763000	1	D2XV59	D2XV59	GTP-binding protein 1	Gtpbp1
29.8855	28.7116	29.7645	29.2236	27.1865	NaN	29.0336	27.8383				8	8	8	45.4	45.4	45.4	23.909	0	31.565	2622200000	35	D3Z8L7	D3Z8L7	Ras-related protein R-Ras	Rras
NaN	NaN	NaN	NaN	NaN	NaN	27.0398	NaN				2	1	1	0.8	0.4	0.4	303.45	0.0093458	-0.69756	64940000	1	D3ZA12	D3ZA12	Chromodomain-helicase-DNA-binding protein 6	Chd6
28.2956	27.4371	28.4792	27.8445	26.3662	NaN	28.0785	NaN				4	4	4	34.1	34.1	34.1	10.452	0	3.0947	1179400000	24	D3ZAF6	D3ZAF6	ATP synthase subunit f, mitochondrial	Atp5j2
27.126	27.4958	26.9389	27.6195	27.2443	NaN	26.8727	NaN				6	6	5	24.8	24.8	22.2	34.529	0	11.202	671220000	15	D3ZBE5	D3ZBE5	Serine/threonine-protein kinase Nek7	Nek7
31.1059	31.3371	31.3264	31.0396	31.3578	30.4328	31.0739	30.6469				4	4	4	15.3	15.3	15.3	22.649	0	3.8551	9305700000	52	D3ZBN0	D3ZBN0	Histone H1.5	Hist1h1b
24.5655	NaN	25.1616	NaN	NaN	NaN	24.36	NaN				3	3	3	5.7	5.7	5.7	70.167	0	5.5737	106610000	6	D3ZC96	D3ZC96	Tetratricopeptide repeat protein 39B	Ttc39b
27.7253	26.8975	27.3961	NaN	28.2703	NaN	27.1239	NaN				5	5	5	3.1	3.1	3.1	222.26	0	4.0835	652150000	11	D3ZD32	D3ZD32	Chromodomain-helicase-DNA-binding protein 5	Chd5
25.209	25.8006	25.5145	25.8096	NaN	NaN	NaN	NaN				4	4	4	18.1	18.1	18.1	34.6	0	3.1687	167360000	7	D3ZDK7	D3ZDK7		Pgp
NaN	NaN	24.775	NaN	NaN	NaN	NaN	NaN				4	4	4	2.8	2.8	2.8	192.66	0.0024704	0.16381	83171000	3	D3ZEF4	D3ZEF4	Cullin-7	Cul7
25.5696	25.628	25.6709	25.2972	25.3366	NaN	25.7945	NaN				4	4	4	7	7	7	94.526	0	31.018	218640000	10	D3ZEH5	D3ZEH5	SID1 transmembrane family member 2	Sidt2
NaN	25.072	24.473	28.424	NaN	NaN	NaN	25.8658				2	2	2	1.3	1.3	1.3	167.21	0	1.8752	179750000	3	D3ZGB1	D3ZGB1	Nuclear factor of activated T-cells 5	Nfat5
34.0108	29.8021	33.827	30.2373	33.9861	31.2562	33.1217	31.7463				92	92	92	45	45	45	290.98	0	323.31	51780000000	370	D3ZHA0	D3ZHA0	Filamin-C	Flnc
32.1506	30.2417	31.8113	29.9905	31.543	28.2056	30.1747	29.7269				118	118	118	30.1	30.1	30.1	619.59	0	323.31	10633000000	240	D3ZHV2	D3ZHV2	Microtubule-actin cross-linking factor 1	Macf1
NaN	NaN	NaN	NaN	NaN	NaN	23.499	NaN				2	1	1	3.7	2.1	2.1	55.292	0.0043186	-0.2595	19346000	1	D3ZLZ7	D3ZLZ7	Inosine-5-monophosphate dehydrogenase 1	Impdh1
NaN	NaN	24.7353	NaN	NaN	NaN	NaN	NaN				3	3	2	6	6	4.6	60.604	0	2.4905	51123000	3	D3ZSI8	D3ZSI8	Phosphatidylinositol 4-phosphate 5-kinase type-1 alpha	Pip5k1a
29.228	29.2725	29.5854	29.0567	29.0848	NaN	28.8949	NaN				6	6	6	29.2	29.2	29.2	25.479	0	11.439	2679400000	30	D3ZTX0	D3ZTX0	Transmembrane emp24 domain-containing protein 7	Tmed7
25.8204	28.6373	25.5935	28.941	NaN	27.9264	26.5691	28.1462				3	3	3	13.9	13.9	13.9	21.607	0	4.6291	440120000	8	D3ZVR7	D3ZVR7	Prostamide/prostaglandin F synthase	Fam213b
28.5605	28.2795	28.9688	28.0673	28.2523	NaN	28.2258	27.1932				9	9	9	57.6	57.6	57.6	21.927	0	83.806	1919300000	31	D3ZW55	D3ZW55	Inosine triphosphate pyrophosphatase	Itpa
30.1153	28.3953	29.6998	29.7142	NaN	NaN	29.7116	NaN				5	5	5	7.7	7.7	7.7	88.711	0	8.741	5328800000	13	D3ZYR1	D3ZYR1	F-BAR domain only protein 2	Fcho2
26.1175	NaN	26.557	NaN	26.2745	NaN	NaN	NaN				9	9	9	6	6	6	197.86	0	9.4091	314040000	10	D3ZZ80	D3ZZ80	Obscurin-like protein 1	Obsl1
29.1511	27.9251	29.074	NaN	29.463	30.8053	28.425	NaN				6	6	6	10.7	10.7	10.7	71.773	0	11.366	519720000	13	D3ZZC3	D3ZZC3	Kelch-like protein 22	Klhl22
30.5019	30.692	30.8941	31.3507	30.8828	29.2175	30.7263	27.4933				2	2	2	1.3	1.3	1.3	195.08	0.0070555	-0.60458	8112500000	8	D3ZZL9	D3ZZL9	GRIP and coiled-coil domain-containing protein 2	Gcc2
28.1108	27.6568	28.2512	27.3125	27.7237	26.6431	27.6052	NaN				6	6	6	11.8	11.8	11.8	58.843	0	8.2253	891010000	19	D4A1R8	D4A1R8		Cpne1
26.2105	27.9005	26.2116	27.9068	27.1613	NaN	26.7322	27.8323				6	6	6	7.4	7.4	7.4	120.88	0	3.257	405560000	11	D4A208	D4A208	SLIT-ROBO Rho GTPase-activating protein 2	Srgap2
27.4345	27.9713	27.6591	27.9777	NaN	NaN	26.9872	NaN				4	2	2	18.7	14	14	22.004	0	14.575	642110000	10	D4A3K5	D4A3K5	Histone H1.1	Hist1h1a
27.8252	27.948	27.9643	28.0161	27.7226	NaN	27.9623	NaN				5	5	5	26.3	26.3	26.3	37.361	0	30.035	1021400000	16	D4A4T9	D4A4T9	Cysteine and histidine-rich domain-containing protein 1	Chordc1
25.7511	NaN	26.495	NaN	NaN	NaN	NaN	NaN				9	3	3	5.5	1.7	1.7	207.89	0.0024582	0.11771	392450000	2	D4A631	D4A631	Brefeldin A-inhibited guanine nucleotide-exchange protein 1	Arfgef1
NaN	25.5325	24.5413	25.6629	25.0969	NaN	25.2804	NaN				4	4	4	3.1	3.1	3.1	212.26	0	3.507	93709000	7	D4A929	D4A929	WD repeat-containing protein 81	Wdr81
26.5501	26.7712	26.7484	26.9472	26.7709	NaN	26.8859	NaN				6	4	4	10.3	6.3	6.3	80.488	0	3.5474	417150000	9	D4ABY2	D4ABY2	Coatomer subunit gamma-2	Copg2
NaN	NaN	NaN	NaN	25.6213	NaN	NaN	NaN				2	2	2	2.1	2.1	2.1	105.14	0.005698	-0.433	91181000	3	D4ACE5	D4ACE5	Protein inturned	Intu
26.6598	NaN	26.5675	NaN	NaN	NaN	26.8529	NaN				3	3	3	20.4	20.4	20.4	17.312	0	4.0239	390310000	9	D4ACN8	D4ACN8	Plasminogen receptor (KT)	Plgrkt
27.122	NaN	27.8895	NaN	25.5876	NaN	26.0755	NaN				4	4	4	17.1	17.1	17.1	38.569	0	10.607	305650000	9	D4AD37	D4AD37	Inositol monophosphatase 3	Impad1
26.6679	28.6539	26.8179	29.8252	28.3853	27.6765	27.8855	28.9669				14	14	12	14	14	11.9	111.88	0	21.189	1007000000	19	E9PTG8	E9PTG8	Serine/threonine-protein kinase 10	Stk10
NaN	NaN	NaN	NaN	NaN	NaN	26.8687	NaN				2	2	2	1.1	1.1	1.1	199.86	0.0093327	-0.70938	603380000	7	E9PU17	E9PU17		Abca17
29.1943	29.025	28.9071	29.0693	29.3334	NaN	28.899	NaN				10	10	9	24.7	24.7	23.2	55.814	0	18.693	2281300000	36	E9PU28	E9PU28	Inosine-5-monophosphate dehydrogenase 2	Impdh2
NaN	NaN	NaN	NaN	NaN	NaN	23.4068	NaN				4	1	1	8.7	3.1	3.1	60.613	0.0038629	-0.16015	54917000	1	F1LM93;Q01621	F1LM93	Tyrosine-protein kinase Yes	Yes1
30.3617	30.31	30.2804	30.8584	29.5853	28.8792	30.3332	29.1054				19	19	19	48.3	48.3	48.3	47.463	0	49.097	5147500000	70	F1LMZ8	F1LMZ8	26S proteasome non-ATPase regulatory subunit 11	Psmd11
26.4577	27.3759	26.8437	NaN	NaN	NaN	26.6934	26.8852				5	5	5	12.4	12.4	12.4	58.742	0	9.5817	353710000	11	F1LNI5	F1LNI5	Protein phosphatase 1G	Ppm1g
29.601	28.741	29.1456	29.1634	28.9712	26.3699	29.6278	27.6422				36	36	36	21.6	21.6	21.6	244.87	0	82.938	2915500000	81	F1LNJ2	F1LNJ2	U5 small nuclear ribonucleoprotein 200 kDa helicase	Snrnp200
27.1595	26.469	27.2686	27.5431	NaN	NaN	26.746	NaN				12	12	12	7.9	7.9	7.9	223.93	0	9.6568	536730000	22	F1LP64	F1LP64	E3 ubiquitin-protein ligase TRIP12	Trip12
25.9979	26.2047	NaN	26.6189	26.7759	NaN	25.9413	NaN				3	3	3	2.8	2.8	2.8	150.38	0	4.2081	174840000	9	F1LP90	F1LP90	Misshapen-like kinase 1	Mink1
29.3309	28.673	29.4309	29.5471	29.3719	32.0716	29.9342	NaN				11	11	11	6.1	6.1	6.1	250.22	0	13.849	1230100000	13	F1LPQ2	F1LPQ2	Activating signal cointegrator 1 complex subunit 3	Ascc3
31.3488	30.5256	30.9028	30.1595	31.1945	29.744	31.2958	30.0448				21	21	21	46.4	46.4	46.4	67.902	0	126.53	8689600000	91	F1LQ48	F1LQ48		Hnrnpl
24.9122	NaN	25.2058	25.0132	NaN	NaN	24.9075	NaN				3	3	3	3.9	3.9	3.9	111.19	0	7.7204	140600000	5	F1LSG8	F1LSG8		Ccdc132
26.6509	NaN	26.6857	NaN	26.2974	NaN	26.0725	NaN				8	8	8	9.1	9.1	9.1	118.84	0	7.7422	375710000	8	F1LYQ8	F1LYQ8	FERM, RhoGEF and pleckstrin domain-containing protein 1	Farp1
NaN	25.685	23.8472	26.3052	NaN	NaN	NaN	NaN				4	4	4	12.4	12.4	12.4	42.655	0	7.8786	80699000	9	F1M391	F1M391		Tmem173
NaN	NaN	NaN	25.6007	NaN	NaN	NaN	NaN				2	2	2	2.2	2.2	2.2	116.14	0.0010065	0.50011	23488000	2	F1M649	F1M649	NLR family CARD domain-containing protein 4	Nlrc4
28.7323	31.1683	27.9499	31.4739	30.2209	30.3602	29.9293	29.9573				11	11	11	37	37	37	44.711	0	28.515	2753800000	54	F1M707	F1M707		Ncf1
25.6464	NaN	25.3977	NaN	NaN	NaN	NaN	NaN				3	3	3	8.2	8.2	8.2	68.276	0.0010081	0.51471	129510000	2	F1M7Y5	F1M7Y5	Protein kinase C iota type	Prkci
28.6352	28.6047	28.7707	28.2308	29.6204	28.2628	28.2427	28.7574				30	30	30	15.3	15.3	15.3	267.3	0	90.216	1929500000	48	F1MA98	F1MA98	Nucleoprotein TPR	Tpr
27.1665	NaN	27.5706	NaN	NaN	NaN	26.7727	NaN				4	4	4	14.2	14.2	14.2	40.156	0	2.4174	600630000	4	F2Z3T4	F2Z3T4	Muscleblind-like protein 2	Mbnl2
25.8445	29.0028	30.4349	31.5288	25.8385	26.4188	30.4192	27.4647				12	12	12	34.2	34.2	34.2	58.968	0	255.5	3837400000	63	G3V645	G3V645	2-5-oligoadenylate synthase-like protein 1	Oasl
28.4711	28.7706	28.7563	28.2986	29.3337	29.0291	28.5882	29.6465				5	5	4	12.1	12.1	9.4	39.025	0	6.534	2048800000	19	G3V6S8	G3V6S8	Serine/arginine-rich splicing factor 6	Srsf6
27.8336	28.1986	27.9439	27.5422	28.2615	NaN	28.4782	NaN				6	6	6	30.3	30.3	30.3	31.187	0	28.575	931420000	17	G3V7P1	G3V7P1	Syntaxin-12	Stx12
28.3903	28.64	28.4449	28.5157	28.5757	NaN	28.6928	NaN				7	7	7	47.1	47.1	47.1	21.904	0	16.225	1595000000	37	G3V7W1	G3V7W1		Pdcd6
26.8192	NaN	27.0687	24.686	NaN	NaN	25.7406	NaN				3	3	3	9.7	9.7	9.7	46.509	0	6.7995	390370000	11	G3V9D0	G3V9D0	Protein O-glucosyltransferase 1	Poglut1
29.6194	28.8078	30.738	28.3072	29.6437	27.8517	29.1565	27.4804				9	9	9	35.6	35.6	35.6	32.857	0	24.988	3851100000	47	G3V9R8	G3V9R8	Heterogeneous nuclear ribonucleoprotein C	Hnrnpc
30.6015	30.7182	30.3712	30.9876	30.4243	29.8764	30.457	29.3325				5	5	5	27	27	27	23.624	0	10.456	6210200000	41	M0RC99	M0RC99	Ras-related protein Rab-5A	Rab5a
30.1519	24.3371	30.7418	NaN	29.5092	NaN	28.3759	27.4838				17	17	16	67	67	64.2	31.426	0	71.502	4244400000	50	O08557	O08557	N(G),N(G)-dimethylarginine dimethylaminohydrolase 1	Ddah1
26.2191	NaN	26.3295	26.9278	NaN	NaN	NaN	NaN				4	4	3	13	13	9.2	40.866	0	10.342	299040000	7	O08618	O08618	Phosphoribosyl pyrophosphate synthase-associated protein 2	Prpsap2
NaN	NaN	NaN	NaN	NaN	NaN	24.4548	NaN				2	2	2	3.7	3.7	3.7	82.658	0.0093589	-0.67218	57761000	1	O08619	O08619	Coagulation factor XIII A chain	F13a1
26.5699	26.5273	27.3899	27.4998	27.04	NaN	26.976	NaN				7	7	7	33.3	33.3	33.3	47.681	0	23.91	589900000	15	O08623	O08623	Sequestosome-1	Sqstm1
28.5017	NaN	28.2663	NaN	29.0641	NaN	27.8082	28.1173				10	10	10	33.1	33.1	33.1	50.184	0	16.62	882030000	25	O08628	O08628	Procollagen C-endopeptidase enhancer 1	Pcolce
30.3605	28.6595	30.4304	27.9582	29.6222	28.1068	29.5904	28.3172				14	14	14	24.4	24.4	24.4	88.955	0	78.12	4394100000	69	O08629	O08629	Transcription intermediary factor 1-beta	Trim28
27.4073	NaN	27.6776	NaN	28.0291	NaN	27.2186	NaN				6	6	6	12.9	12.9	12.9	56.493	0	8.1085	681620000	11	O08651	O08651	D-3-phosphoglycerate dehydrogenase	Phgdh
NaN	25.9721	25.3095	25.7319	NaN	NaN	25.9004	NaN				5	5	5	2.4	2.4	2.4	291.7	0.0061379	-0.4986	109750000	6	O08653	O08653	Telomerase protein component 1	Tep1
23.8064	24.2164	23.7041	24.5283	NaN	NaN	NaN	NaN				2	2	2	4.3	4.3	4.3	47.463	0.0033931	-0.080885	48649000	3	O08654	O08654	UPF0183 protein C16orf70 homolog
25.2051	25.7125	25.6166	25.5082	25.4015	NaN	25.7481	NaN				4	4	4	5.7	5.7	5.7	83.584	0	3.9899	175690000	7	O08658	O08658	Nuclear pore complex protein Nup88	Nup88
25.3235	NaN	25.4539	24.4728	24.9998	NaN	24.8567	NaN				5	5	5	2.5	2.5	2.5	236.92	0	3.7559	131810000	7	O08662	O08662	Phosphatidylinositol 4-kinase alpha	Pi4ka
25.959	25.7292	26.4142	25.6338	25.5055	NaN	25.8316	NaN				4	4	4	26.6	26.6	26.6	20.836	0	2.126	291790000	8	O08697	O08697	ADP-ribosylation factor-like protein 2	Arl2
25.68	25.5514	26.2357	26.1598	NaN	NaN	25.5463	NaN				6	6	6	14	14	14	64.893	0	10.857	251330000	12	O08700	O08700	Vacuolar protein sorting-associated protein 45	Vps45
26.9987	26.9365	26.751	26.8662	26.8013	NaN	26.7206	NaN				4	4	4	17.4	17.4	17.4	37.378	0	11.234	485450000	9	O08730	O08730	Glycogenin-1	Gyg1
26.5785	26.4803	26.6529	26.3055	NaN	NaN	26.5589	NaN				7	5	5	6.1	4.4	4.4	137.89	0	9.9158	402250000	12	O08815	O08815	STE20-like serine/threonine-protein kinase	Slk
26.6174	25.7566	27.529	25.1878	25.7884	NaN	26.4422	NaN				10	10	10	17	17	17	92.216	0	10.974	483410000	13	O08837	O08837	Cell division cycle 5-like protein	Cdc5l
27.8438	28.4963	27.9775	28.098	28.7629	28.7295	28.4098	28.1679				7	7	6	17	17	15.6	64.532	0	4.9645	924730000	22	O08839;O08838	O08839	Myc box-dependent-interacting protein 1	Bin1
27.0289	27.2947	27.3798	27.472	26.8602	NaN	26.9713	NaN				4	4	4	9.7	9.7	9.7	70.723	0	21.638	540540000	17	O08984	O08984	Lamin-B receptor	Lbr
26.6116	NaN	26.0596	NaN	26.0456	NaN	25.7911	NaN				6	6	6	14.3	14.3	14.3	45.601	0	4.3399	270220000	10	O09018	O09018	COUP transcription factor 2	Nr2f2
28.8704	26.9717	28.633	27.2533	27.9768	NaN	28.2348	28.2434				14	14	14	28.3	28.3	28.3	72.619	0	43.859	1266700000	26	O09175	O09175	Aminopeptidase B	Rnpep
27.1228	29.4845	28.2321	29.6893	28.1237	28.0152	28.2523	27.8851				12	12	12	19.9	19.9	19.9	88.482	0	54.114	1532500000	23	O09178;P10759	O09178	AMP deaminase 3	Ampd3
24.9919	25.2757	25.2841	NaN	NaN	NaN	NaN	NaN				2	2	2	12.9	12.9	12.9	21.907	0	3.2706	129870000	4	O35093	O35093	Mitochondrial import inner membrane translocase subunit Tim23	Timm23
26.3851	26.6803	26.8737	26.4636	26.6752	NaN	26.5931	NaN				6	6	6	11.9	11.9	11.9	51.06	0	7.2966	406730000	9	O35094	O35094	Mitochondrial import inner membrane translocase subunit TIM44	Timm44
25.5463	NaN	25.1504	NaN	NaN	NaN	NaN	NaN				3	3	3	4.4	4.4	4.4	78.923	0.003861	-0.16446	133090000	4	O35095	O35095	Neurochondrin	Ncdn
25.3497	25.8109	NaN	NaN	NaN	NaN	NaN	NaN				2	2	2	3.6	3.6	3.6	65.021	0.0010055	0.48277	118920000	2	O35112	O35112	CD166 antigen	Alcam
30.9368	NaN	30.4531	NaN	30.9932	NaN	29.1375	NaN				14	14	14	67.7	67.7	67.7	32.086	0	71.218	5376500000	54	O35115	O35115	Four and a half LIM domains protein 2	Fhl2
31.3634	31.0842	31.3085	31.2136	31.2073	29.0004	31.1667	29.8667				28	28	28	40.7	40.7	40.7	102.55	0	124.99	10725000000	142	O35142	O35142	Coatomer subunit beta	Copb2
25.1515	24.551	26.0056	24.9291	24.6556	NaN	25.732	NaN				4	4	4	9.8	9.8	9.8	51.795	0	4.9306	207310000	7	O35162	O35162	Heat shock 70 kDa protein 13	Hspa13
26.3971	NaN	26.137	NaN	27.111	NaN	25.6366	NaN				4	4	4	22.6	22.6	22.6	24.607	0	3.2155	291670000	9	O35165	O35165	Golgi SNAP receptor complex member 2	Gosr2
26.2271	NaN	26.2204	NaN	NaN	NaN	24.2344	NaN				6	6	6	18.3	18.3	18.3	54.589	0	5.7878	234840000	9	O35217	O35217	Multiple inositol polyphosphate phosphatase 1	Minpp1
30.6293	29.537	30.7621	29.047	29.7043	28.9005	29.856	28.3688				10	10	10	52.2	52.2	52.2	24.818	0	132.07	5573700000	67	O35244	O35244	Peroxiredoxin-6	Prdx6
26.0518	NaN	26.108	25.9488	NaN	NaN	25.5158	NaN				3	3	3	9.5	9.5	9.5	47.672	0	14.846	249680000	7	O35254	O35254	Golgi reassembly-stacking protein 1	Gorasp1
26.7951	24.2794	26.7121	24.3501	25.0036	NaN	25.1946	NaN				5	5	5	23.7	23.7	23.7	25.863	0	25.838	298770000	9	O35263	O35263	Platelet-activating factor acetylhydrolase IB subunit gamma	Pafah1b3
29.1009	27.9734	28.5461	28.2054	27.573	NaN	27.6238	NaN				4	4	4	26.2	26.2	26.2	25.581	0	71.819	1599500000	18	O35264	O35264	Platelet-activating factor acetylhydrolase IB subunit beta	Pafah1b2
NaN	NaN	24.6058	NaN	24.9951	NaN	NaN	NaN				2	2	2	2.6	2.6	2.6	89.645	0	4.7784	76271000	4	O35274	O35274	Neurabin-2	Ppp1r9b
29.2772	29.9378	29.2544	30.0065	28.5398	27.1215	28.4988	27.3478				20	20	20	35.5	35.5	35.5	83.907	0	107.34	2670300000	66	O35303	O35303	Dynamin-1-like protein	Dnm1l
28.2382	25.5406	28.6197	26.4428	26.4277	NaN	27.9369	NaN				8	8	8	38.8	38.8	38.8	34.908	0	38.393	1058300000	25	O35331	O35331	Pyridoxal kinase	Pdxk
26.0636	26.8198	26.1844	26.6418	26.387	NaN	25.7762	NaN				8	8	7	8.6	8.6	7.9	119.72	0	3.5843	312970000	14	O35346	O35346	Focal adhesion kinase 1	Ptk2
NaN	NaN	NaN	NaN	NaN	NaN	NaN	26.2402				7	1	1	20.6	3.5	3.5	37.363	0.0057143	-0.39017	251150000	0	O35353	O35353	Guanine nucleotide-binding protein subunit beta-4	Gnb4
26.5443	NaN	25.2212	27.0675	26.1201	NaN	NaN	NaN				3	3	3	20	20	20	20.643	0	4.7933	206310000	8	O35394	O35394	Prenylated Rab acceptor protein 1	Rabac1
24.7237	NaN	24.7628	NaN	NaN	NaN	NaN	NaN				3	3	3	11.2	11.2	11.2	31.556	0	3.6461	80379000	4	O35397	O35397	Caspase-6;Caspase-6 subunit p18;Caspase-6 subunit p11	Casp6
31.4526	32.0688	31.6184	32.0281	31.9378	31.9329	31.9062	32.315				12	12	12	57.8	57.8	57.8	24.488	0	119.33	13069000000	101	O35509;P62494	O35509;P62494	Ras-related protein Rab-11B;Ras-related protein Rab-11A	Rab11b;Rab11a
25.677	NaN	25.5735	NaN	NaN	NaN	NaN	NaN				2	2	2	8.9	8.9	8.9	34.963	0	3.3587	163640000	2	O35532	O35532	Methylsterol monooxygenase 1	Msmo1
26.0251	27.8988	25.6617	29.0133	26.5052	NaN	26.3865	NaN				3	3	3	15.1	15.1	15.1	23.297	0.00052826	1.2583	420730000	10	O35543	O35543	Hematopoietic prostaglandin D synthase	Hpgds
28.5976	28.5739	29.4936	30.7028	28.0801	NaN	29.2644	29.2457				23	23	22	48.1	48.1	46.4	74.326	0	84.597	2902400000	56	O35547	O35547	Long-chain-fatty-acid--CoA ligase 4	Acsl4
31.3225	31.5543	31.2773	31.7042	31.2139	30.7169	31.262	31.3456				26	26	26	61.8	61.8	61.8	64.208	0	167.95	11525000000	168	O35567	O35567	Bifunctional purine biosynthesis protein PURH;Phosphoribosylaminoimidazolecarboxamide formyltransferase;IMP cyclohydrolase	Atic
27.8829	27.3856	27.7183	26.8356	28.4004	NaN	27.2112	NaN				8	8	8	53.3	53.3	53.3	26.396	0	19.987	907310000	15	O35760	O35760	Isopentenyl-diphosphate Delta-isomerase 1	Idi1
33.4412	34.2119	33.7205	34.2124	33.5813	33.2341	33.5849	34.0665				31	31	22	48.4	48.4	36.7	67.738	0	214.62	56852000000	320	O35763	O35763	Moesin	Msn
27.4772	NaN	28.0116	27.3763	28.2801	NaN	27.3584	NaN				3	3	3	9	9	9	37.992	0	2.6386	745930000	9	O35777	O35777	Magnesium transporter protein 1	Magt1
31.6532	29.8905	32.0227	29.582	31.1344	31.1486	31.2192	32.4964				8	8	8	33.3	33.3	33.3	36.996	0	129.65	9064700000	63	O35783	O35783	Calumenin	Calu
NaN	NaN	NaN	NaN	NaN	NaN	21.4439	NaN				2	1	1	2	0.8	0.8	122.33	0.0015008	0.33701	16725000	1	O35787	O35787	Kinesin-like protein KIF1C	Kif1c
27.6155	27.7129	27.9012	27.4594	NaN	NaN	27.4224	NaN				4	4	4	26.5	26.5	26.5	30.997	0	43.19	894610000	21	O35796	O35796	Complement component 1 Q subcomponent-binding protein, mitochondrial	C1qbp
23.9822	NaN	24.3191	NaN	NaN	NaN	NaN	NaN				2	2	2	1.2	1.2	1.2	189.87	0	2.2456	52773000	2	O35806	O35806	Latent-transforming growth factor beta-binding protein 2	Ltbp2
30.9158	30.7499	31.1218	30.2764	31.0278	30.6373	30.5039	30.4804				20	20	20	41.8	41.8	41.8	62.569	0	110.32	8437200000	106	O35814	O35814	Stress-induced-phosphoprotein 1	Stip1
28.46	27.673	28.8518	27.6877	27.2797	NaN	27.9273	27.4802				14	14	14	13.6	13.6	13.6	152.28	0	23.636	1400200000	39	O35821	O35821	Myb-binding protein 1A	Mybbp1a
28.7986	28.9226	29.0771	29.3279	28.9439	NaN	28.8684	29.2576				11	11	11	34.2	34.2	34.2	45.765	0	11.363	2340100000	31	O35824	O35824	DnaJ homolog subfamily A member 2	Dnaja2
29.7351	31.4199	29.5761	31.32	30.7828	30.4699	30.4928	30.6497				18	18	18	28.7	28.7	28.7	100.78	0	96.81	5176300000	85	O35828	O35828	Coronin-7	Coro7
26.4346	NaN	NaN	NaN	NaN	NaN	NaN	NaN				2	1	1	3.1	1.5	1.5	59.431	0.0057034	-0.4049	90701000	1	O35831;O35832;Q3MJK5	O35831;O35832;Q3MJK5	Cyclin-dependent kinase 17;Cyclin-dependent kinase 18;Cyclin-dependent kinase 12	Cdk17;Cdk18;Cdk12
27.5255	27.3365	27.6984	27.3285	27.139	NaN	27.45	NaN				8	8	8	27.7	27.7	27.7	44.275	0	16.575	811870000	23	O35854	O35854	Branched-chain-amino-acid aminotransferase, mitochondrial	Bcat2
25.1085	NaN	25.5542	NaN	NaN	NaN	NaN	NaN				6	6	6	5.1	5.1	5.1	207.68	0	6.1257	126260000	6	O35889	O35889	Afadin	Mllt4
28.7597	29.1067	28.9947	30.1436	29.1283	NaN	29.0146	NaN				5	5	5	11.9	11.9	11.9	50.548	0	11.04	2265600000	27	O35910	O35910	Monocarboxylate transporter 4	Slc16a3
NaN	29.1068	NaN	28.4885	28.7132	28.9901	26.1939	29.3953				2	2	2	9.1	9.1	9.1	34.109	0	6.6468	446960000	16	O35952	O35952	Hydroxyacylglutathione hydrolase, mitochondrial	Hagh
31.1245	30.4617	31.5617	29.8076	29.9309	NaN	31.1039	NaN				9	9	9	28	28	28	41.492	0	50.211	7674200000	24	O35964;O35179	O35964	Endophilin-A2	Sh3gl1
27.1373	27.6871	27.3324	27.268	26.8748	NaN	27.475	NaN				7	7	7	24.3	24.3	24.3	40.679	0	21.944	666240000	16	O35987	O35987	NSFL1 cofactor p47	Nsfl1c
28.132	27.4046	27.6535	27.5185	26.074	NaN	27.1537	NaN				10	10	10	24.4	24.4	24.4	56.121	0	5.5717	753100000	18	O54748	O54748	Serine/threonine-protein kinase 3;Serine/threonine-protein kinase 3 36kDa subunit;Serine/threonine-protein kinase 3 20kDa subunit	Stk3
24.7621	NaN	25.1859	NaN	NaN	NaN	24.4522	NaN				2	2	2	4.9	4.9	4.9	59.128	0.0010183	0.60997	112360000	2	O54772	O54772	SWI/SNF-related matrix-associated actin-dependent regulator of chromatin subfamily D member 2	Smarcd2
NaN	NaN	26.5993	27.0894	NaN	NaN	26.8629	NaN				2	2	2	4.4	4.4	4.4	62.276	0.00053908	1.5545	292250000	5	O54902	O54902	Natural resistance-associated macrophage protein 2	Slc11a2
25.9689	NaN	25.7077	25.4232	NaN	NaN	NaN	NaN				4	4	4	4.7	4.7	4.7	104.03	0	5.3905	133820000	5	O54921	O54921	Exocyst complex component 2	Exoc2
24.4919	25.9237	24.4098	24.9872	NaN	NaN	NaN	NaN				4	4	4	7.7	7.7	7.7	75.045	0	8.6525	99959000	7	O54922	O54922	Exocyst complex component 7	Exoc7
NaN	25.4916	NaN	25.6382	NaN	NaN	24.8232	NaN				2	2	2	3.8	3.8	3.8	81.042	0.0005277	1.2353	64948000	5	O54924	O54924	Exocyst complex component 8	Exoc8
30.7841	30.067	30.5807	29.739	29.3367	28.3003	30.6528	29.3857				19	19	19	39	39	39	69.657	0	37.873	5220700000	74	O54975	O54975	Xaa-Pro aminopeptidase 1;Xaa-Pro aminopeptidase 1, N-terminally processed	Xpnpep1
30.7433	30.4131	31.0715	30.907	30.658	30.0466	30.8976	30.4032				15	15	15	31.6	31.6	31.6	69.285	0	110.93	7133000000	69	O55012;Q05140	O55012	Phosphatidylinositol-binding clathrin assembly protein	Picalm
24.7913	NaN	25.0152	NaN	NaN	NaN	NaN	NaN				4	4	4	6.4	6.4	6.4	88.378	0.002924	-0.032397	101600000	4	O55035	O55035	Peptidyl-prolyl cis-trans isomerase G	Ppig
24.2597	NaN	25.1155	NaN	NaN	NaN	NaN	NaN				4	2	2	7.9	4.3	4.3	73.139	0	7.0421	95228000	3	O55043	O55043	Rho guanine nucleotide exchange factor 7	Arhgef7
30.834	30.0405	30.9158	29.6768	30.1669	28.3866	30.374	29.5347				20	20	20	38.9	38.9	38.9	83.038	0	226.37	4885700000	94	O55096	O55096	Dipeptidyl peptidase 3	Dpp3
NaN	26.3479	NaN	27.9598	24.7408	NaN	25.5935	NaN				4	4	4	14.7	14.7	14.7	48.274	0	4.7166	150410000	8	O55148	O55148	Growth arrest-specific protein 7	Gas7
26.2249	26.1355	27.0442	26.2178	NaN	NaN	26.2188	NaN				6	6	6	6.6	6.6	6.6	115.48	0	8.6379	371040000	8	O55156	O55156	CAP-Gly domain-containing linker protein 2	Clip2
25.6742	26.2799	25.9676	26.4457	25.9753	NaN	25.9577	NaN				7	7	7	12.3	12.3	12.3	82.102	0	4.2668	295810000	11	O55166	O55166	Vacuolar protein sorting-associated protein 52 homolog	Vps52
25.8526	23.4625	24.6715	23.6943	NaN	NaN	24.3806	NaN				3	3	3	9.1	9.1	9.1	49.701	0	16.988	123450000	4	O55171;O88267	O55171	Acyl-coenzyme A thioesterase 2, mitochondrial	Acot2
NaN	NaN	NaN	NaN	27.8118	NaN	NaN	NaN				2	1	1	3.5	1.4	1.4	61.769	0.0057116	-0.3981	447840000	4	O70142	O70142	SHC-transforming protein 2	Shc2
29.2222	28.1564	30.0335	28.1788	27.6484	25.7157	28.975	NaN				20	20	20	37	37	37	80.741	0	88.541	2394000000	50	O70196	O70196	Prolyl endopeptidase	Prep
29.9488	26.6525	31.3063	26.848	28.7307	NaN	30.6134	28.0745				19	19	19	43.4	43.4	43.4	54.891	0	84.543	5277400000	53	O70199	O70199	UDP-glucose 6-dehydrogenase	Ugdh
26.517	27.3934	26.258	27.0622	27.4225	26.6528	26.7468	NaN				4	4	4	21.8	21.8	21.8	29.85	0	16.459	446970000	23	O70257	O70257	Syntaxin-7	Stx7
28.896	29.7472	29.1988	29.57	28.3897	NaN	29.1894	NaN				3	3	3	4.2	4.2	4.2	80.795	0.00052743	1.228	1987500000	7	O70277	O70277	Tripartite motif-containing protein 3	Trim3
29.0856	28.2895	29.2248	28.2841	28.3379	NaN	28.6181	NaN				10	10	10	49.8	49.8	49.8	27.245	0	46.171	1870100000	47	O70351	O70351	3-hydroxyacyl-CoA dehydrogenase type-2	Hsd17b10
NaN	27.6053	27.083	28.3186	27.6848	NaN	27.6022	NaN				3	3	3	12	12	12	29.487	0	4.2044	544540000	9	O70352	O70352	CD82 antigen	Cd82
27.8588	28.5917	27.6346	27.6749	27.4206	27.1402	27.6907	28.2741				6	6	6	37.1	37.1	37.1	23.235	0	18.562	928860000	21	O70377	O70377	Synaptosomal-associated protein 23	Snap23
27.1072	26.4679	27.6162	27.0182	26.5876	NaN	26.9005	NaN				5	5	5	29.9	29.9	29.9	17	0	2.3655	505510000	9	O70454	O70454	Protein BUD31 homolog	Bud31
26.0151	24.9511	29.2061	26.2888	NaN	NaN	27.2298	NaN				10	10	10	21.8	21.8	21.8	63.742	0	64.764	1086700000	17	O70513	O70513	Galectin-3-binding protein	Lgals3bp
24.3821	NaN	24.8327	23.4555	NaN	NaN	23.9807	NaN				3	3	3	6.8	6.8	6.8	64.145	0	5.605	89423000	7	O70536	O70536	Sterol O-acyltransferase 1	Soat1
28.0751	28.0391	28.1653	27.8954	28.1637	27.6555	27.8017	28.6165				8	8	8	30.3	30.3	30.3	34.157	0	39.225	1178900000	30	O70593	O70593	Small glutamine-rich tetratricopeptide repeat-containing protein alpha	Sgta
NaN	NaN	28.3246	NaN	NaN	NaN	29.075	NaN				8	8	8	33.6	33.6	33.6	41.255	0	12.673	763500000	10	O70600	O70600	Radical S-adenosyl methionine domain-containing protein 2	Rsad2
26.4843	NaN	26.4397	24.2721	NaN	NaN	25.5519	NaN				3	3	3	5.6	5.6	5.6	60.157	0	2.9979	250030000	7	O88339;Q4V882	O88339	Epsin-1	Epn1
26.1295	NaN	26.3	NaN	NaN	NaN	NaN	NaN				3	3	3	26.9	26.9	26.9	20.995	0	8.7949	200560000	4	O88350	O88350	Putative hydrolase RBBP9	Rbbp9
NaN	NaN	24.9649	NaN	NaN	NaN	24.066	NaN				2	2	2	5.2	5.2	5.2	47.048	0.0043207	-0.25359	73924000	2	O88370	O88370	Phosphatidylinositol 5-phosphate 4-kinase type-2 gamma	Pip4k2c
NaN	NaN	NaN	NaN	NaN	NaN	24.5252	NaN				2	1	1	5.5	3.4	3.4	47.263	0.0093545	-0.67228	61277000	1	O88377	O88377	Phosphatidylinositol 5-phosphate 4-kinase type-2 beta	Pip4k2b
26.459	26.0578	26.7347	NaN	26.4889	NaN	26.2037	NaN				4	4	4	6.8	6.8	6.8	104.57	0	9.1433	372990000	7	O88453	O88453	Scaffold attachment factor B1	Safb
26.8694	25.3827	27.1594	NaN	25.3241	NaN	26.4019	NaN				5	5	5	7.7	7.7	7.7	87.478	0	5.08	452550000	10	O88496	O88496	Vitamin K-dependent gamma-carboxylase	Ggcx
24.3778	NaN	24.2625	NaN	NaN	NaN	NaN	NaN				5	5	5	5.8	5.8	5.8	104.7	0.001497	0.29077	293450000	6	O88588	O88588	Phosphofurin acidic cluster sorting protein 1	Pacs1
31.8599	31.2479	32.119	31.5291	31.6147	31.0811	31.5762	31.8409				38	38	37	60.6	60.6	58.9	94.055	0	318.83	14928000000	221	O88600	O88600	Heat shock 70 kDa protein 4	Hspa4
31.8489	32.8684	32.0583	33.1217	32.0923	31.9338	32.1202	31.5813				15	15	14	50.8	50.8	44.6	41.056	0	141.08	16728000000	108	O88656	O88656	Actin-related protein 2/3 complex subunit 1B	Arpc1b
25.6793	NaN	NaN	NaN	NaN	NaN	NaN	NaN				3	3	2	2.3	2.3	1.5	204.17	0.0014978	0.29106	88143000	0	O88658	O88658	Kinesin-like protein KIF1B	Kif1b
NaN	NaN	NaN	24.4575	NaN	NaN	NaN	NaN				4	2	2	4.9	2.8	2.8	115.95	0.0056845	-0.45014	43199000	3	O88664	O88664	Serine/threonine-protein kinase TAO1	Taok1
30.9226	30.2852	30.4033	30.3884	29.7608	28.3327	30.2358	28.2148				27	27	27	37.9	37.9	37.9	105.75	0	137.48	5640500000	107	O88761	O88761	26S proteasome non-ATPase regulatory subunit 1	Psmd1
24.529	NaN	24.9252	NaN	NaN	NaN	NaN	NaN				2	2	2	5.6	5.6	5.6	51.449	0.0010283	0.76598	79737000	4	O88764	O88764	Death-associated protein kinase 3	Dapk3
29.8473	29.8675	29.9123	29.3399	28.9427	29.3688	29.8268	29.714				6	6	6	49.2	49.2	49.2	19.974	0	42.55	3483900000	35	O88767	O88767	Protein deglycase DJ-1	Park7
28.6692	29.5053	28.1548	30.483	28.514	26.8152	29.0122	27.5878				8	8	8	27.4	27.4	27.4	37.005	0	35.666	2084800000	55	O88775	O88775	Embigin	Emb
29.9669	31.1176	29.8936	30.3164	30.7709	30.108	30.2189	30.701				14	14	14	25.5	25.5	25.5	82.376	0	32.001	4902100000	63	O88797	O88797	Disabled homolog 2	Dab2
27.7854	28.6247	27.7162	28.8404	28.3112	27.1957	28.4893	NaN				13	13	11	21.1	21.1	18.2	76.404	0	11.341	1058700000	29	O88813	O88813	Long-chain-fatty-acid--CoA ligase 5	Acsl5
27.5227	27.7178	28.0831	28.0364	28.2503	NaN	27.4751	NaN				11	11	11	9.7	9.7	9.7	163.45	0	15.337	875920000	19	O88902	O88902	Tyrosine-protein phosphatase non-receptor type 23	Ptpn23
26.8696	27.4032	27.1138	27.7064	26.943	NaN	27.2232	NaN				9	9	9	13.1	13.1	13.1	91.87	0	8.4533	607760000	24	O88941	O88941	Mannosyl-oligosaccharide glucosidase	Mogs
24.1497	NaN	24.2571	NaN	NaN	NaN	NaN	NaN				2	2	2	3.9	3.9	3.9	70.361	0.001006	0.49183	53465000	3	O88984	O88984	Nuclear RNA export factor 1	Nxf1
32.1322	31.7589	32.2281	31.7267	31.7358	30.8393	31.7661	30.5798				11	11	11	35.9	35.9	35.9	36.483	0	65.688	14773000000	79	O88989	O88989	Malate dehydrogenase, cytoplasmic	Mdh1
26.1203	26.5586	25.1474	26.301	26.7332	NaN	NaN	NaN				2	2	2	5.3	5.3	5.3	38.248	0.00053792	1.4879	201460000	4	O88994	O88994	Mitochondrial amidoxime reducing component 2	2018-03-02
29.6906	30.594	29.9375	31.1178	30.1079	30.561	30.1057	31.0914				7	7	7	12.4	12.4	12.4	53.845	0	9.713	3944500000	56	O89046;Q920J3	O89046	Coronin-1B	Coro1b
30.9512	30.6927	31.2193	31.7703	31.3031	30.5443	31.212	32.0599				19	19	19	49.3	49.3	49.3	54.67	0	184.68	9834200000	95	O89049;Q9Z0J5	O89049	Thioredoxin reductase 1, cytoplasmic	Txnrd1
28.6623	30.4908	28.8812	30.2149	29.5617	29.8819	29.0684	NaN				5	5	5	47.8	47.8	47.8	15.355	0	24.409	2698300000	45	P00173	P00173	Cytochrome b5	Cyb5a
30.804	32.137	31.5797	32.4005	31.91	30.6343	31.8601	31.1268				26	26	26	45.9	45.9	45.9	76.962	0	90.73	9548300000	148	P00388	P00388	NADPH--cytochrome P450 reductase	Por
29.8329	28.5499	30.0664	28.7614	26.8637	NaN	29.2485	NaN				4	4	4	23.3	23.3	23.3	25.928	0	17.787	3585100000	38	P00406	P00406	Cytochrome c oxidase subunit 2	Mtco2
31.7435	31.2569	31.6684	31.6008	30.953	30.0661	31.3637	29.5971				19	19	19	46.3	46.3	46.3	47.314	0	113.03	11932000000	106	P00507	P00507	Aspartate aminotransferase, mitochondrial	Got2
25.6627	30.3343	25.5844	30.6402	26.994	27.7664	26.3246	29.486				4	4	4	35.1	35.1	35.1	16.729	0	61.68	889290000	25	P00697;Q05820	P00697;Q05820	Lysozyme C-1;Putative lysozyme C-2	Lyz1;Lyz2
NaN	NaN	NaN	25.7794	NaN	NaN	NaN	NaN				3	3	3	11.1	11.1	11.1	37.104	0	2.4102	171370000	5	P00786	P00786	Pro-cathepsin H;Cathepsin H mini chain;Cathepsin H;Cathepsin H heavy chain;Cathepsin H light chain	Ctsh
33.3698	33.9689	33.0238	32.8256	34.3442	33.3052	33.5826	31.3564				14	14	14	45.7	45.7	45.7	37.47	0	228	47091000000	243	P00787	P00787	Cathepsin B;Cathepsin B light chain;Cathepsin B heavy chain	Ctsb
NaN	26.831	28.6207	28.7045	NaN	NaN	27.8934	NaN				18	13	13	13.8	10.3	10.3	186.46	0	18.856	670130000	20	P01026	P01026	Complement C3;Complement C3 beta chain;C3-beta-c;Complement C3 alpha chain;C3a anaphylatoxin;Acylation stimulating protein;Complement C3b alpha chain;Complement C3c alpha chain fragment 1;Complement C3dg fragment;Complement C3g fragment;Complement C3d fragment;Complement C3f fragment;Complement C3c alpha chain fragment 2	C3
27.6473	30.2973	28.523	29.7009	27.3389	NaN	28.5715	NaN				3	3	3	34.7	34.7	34.7	11.196	0	14.759	1654700000	14	P01041	P01041	Cystatin-B	Cstb
30.126	NaN	30.6494	NaN	28.7656	NaN	28.8466	NaN				4	4	4	28.6	28.6	28.6	18.172	0	34.303	4207400000	22	P01830	P01830	Thy-1 membrane glycoprotein	Thy1
30.9165	31.5034	31.5615	30.316	30.5513	31.0248	30.4002	31.5443				9	9	9	78.3	78.3	78.3	11.692	0	43.783	7116200000	50	P02401	P02401	60S acidic ribosomal protein P2	Rplp2
31.9263	28.6295	30.2964	27.6387	32.8504	30.5592	30.3295	31.063				41	41	40	46.5	46.5	45.5	137.95	0	161.94	7356500000	126	P02454;CON__Q862S4	P02454	Collagen alpha-1(I) chain	Col1a1
31.0621	NaN	28.1382	NaN	30.531	27.3758	28.0237	29.4614				28	28	28	32.3	32.3	32.3	129.56	0	79.5	2214600000	54	P02466	P02466	Collagen alpha-2(I) chain	Col1a2
30.055	31.3239	29.2232	32.2181	31.4366	32.0507	30.9784	31.8633				13	13	13	37.8	37.8	37.8	35.753	0	157.63	6304400000	77	P02650	P02650	Apolipoprotein E	Apoe
28.4213	NaN	29.5985	NaN	25.072	NaN	27.2385	NaN				9	9	9	55.6	55.6	55.6	15.834	0	41.876	1734900000	26	P02696	P02696	Retinol-binding protein 1	Rbp1
30.864	32.2163	31.5578	32.7349	30.2802	30.2173	31.9431	29.9234				9	9	9	60.1	60.1	60.1	20.748	0	97.045	13354000000	125	P02793;Q7TP54	P02793;Q7TP54	Ferritin light chain 1;Protein FAM65B	Ftl1;Fam65b
NaN	NaN	24.4146	NaN	NaN	NaN	24.3494	NaN				2	2	2	5	5	5	36.145	0.0047824	-0.29276	62248000	4	P03889	P03889	NADH-ubiquinone oxidoreductase chain 1	Mtnd1
30.0222	31.5754	29.6581	31.3151	30.5758	30.5259	30.7318	30.5474				12	12	12	69.7	69.7	69.7	22.305	0	32.903	5698300000	96	P04041	P04041	Glutathione peroxidase 1	Gpx1
29.0405	32.7639	29.1119	32.8999	30.9577	32.0086	30.4712	32.1595				24	24	24	23.6	23.6	23.6	143.27	0	38.583	3644100000	79	P04157	P04157	Receptor-type tyrosine-protein phosphatase C	Ptprc
27.617	25.7696	27.4356	26.946	NaN	NaN	27.7137	NaN				4	4	4	43.2	43.2	43.2	16.265	0	43.519	731580000	14	P04166	P04166	Cytochrome b5 type B	Cyb5b
30.1518	29.6538	30.0112	29.9245	29.4763	28.9539	30.038	29.828				15	15	15	48.3	48.3	48.3	48.332	0	79.658	3997900000	82	P04182	P04182	Ornithine aminotransferase, mitochondrial	Oat
25.094	NaN	25.6928	NaN	NaN	NaN	24.9665	NaN				2	2	2	7.6	7.6	7.6	31.088	0.0047801	-0.29289	152510000	3	P04218	P04218	OX-2 membrane glycoprotein	Cd200
31.8717	31.7113	31.829	31.0892	32.1502	31.635	31.4526	32.0644				12	12	12	40.9	40.9	40.9	34.212	0	66.027	13851000000	88	P04256	P04256	Heterogeneous nuclear ribonucleoprotein A1;Heterogeneous nuclear ribonucleoprotein A1, N-terminally processed	Hnrnpa1
32.5335	32.3567	32.6908	32.3099	32.2963	31.6477	32.1761	31.5702				15	15	15	59.2	59.2	59.2	35.683	0	88.321	20184000000	165	P04636	P04636	Malate dehydrogenase, mitochondrial	Mdh2
35.593	35.3181	35.7393	35.7352	35.5053	34.4259	35.7333	34.1804				18	18	16	58.7	58.7	52.4	36.45	0	198.32	173770000000	288	P04642;P19629	P04642	L-lactate dehydrogenase A chain	Ldha
30.532	28.4394	30.8228	29.0146	28.3878	NaN	30.1454	28.1056				6	6	6	49.6	49.6	49.6	15.51	0	61.285	5265800000	39	P04644	P04644	40S ribosomal protein S17	Rps17
NaN	NaN	28.838	NaN	NaN	NaN	NaN	NaN				3	3	3	22.7	22.7	22.7	12.554	0.0084586	-0.62568	1527100000	5	P04646	P04646	60S ribosomal protein L35a	Rpl35a
34.475	32.0181	34.1469	31.6998	33.9706	33.093	32.6239	31.6284				21	21	13	50.7	50.7	35.9	32.68	0	275.15	63861000000	211	P04692	P04692	Tropomyosin alpha-1 chain	Tpm1
29.868	27.7327	30.0398	25.9834	29.978	NaN	30.244	27.0251				18	18	18	40.6	40.6	40.6	59.756	0	62.812	3430000000	53	P04762	P04762	Catalase	Cat
35.9478	35.1773	35.9904	35.3907	34.9949	33.5669	35.6069	33.634				24	24	21	71.4	71.4	59	47.127	0	323.31	154170000000	344	P04764	P04764	Alpha-enolase	Eno1
34.7582	34.8787	34.9698	35.104	35.2942	35.0612	35.2423	35.6611				27	27	27	65	65	65	56.951	0	323.31	127700000000	417	P04785	P04785	Protein disulfide-isomerase	P4hb
35.1668	34.3932	35.5776	34.3601	34.4633	33.1128	34.7618	33.9418				18	18	18	56.5	56.5	56.5	35.828	0	323.31	123740000000	385	P04797;Q9ESV6	P04797	Glyceraldehyde-3-phosphate dehydrogenase	Gapdh
32.2188	32.2605	32.0295	32.3603	32.1522	31.3862	31.8493	31.3121				16	16	12	56.6	56.6	45.4	40.499	0	206.79	17698000000	151	P04897;P10824;P29348;P59215;P38406	P04897	Guanine nucleotide-binding protein G(i) subunit alpha-2	Gnai2
30.8775	29.832	30.472	29.64	31.9881	30.8836	31.5566	31.3275				9	9	7	31.7	31.7	27.6	25.319	0	38.747	7263900000	53	P04904;P46418;P04903;P00502;P14942	P04904;P46418	Glutathione S-transferase alpha-3;Glutathione S-transferase alpha-5	Gsta3;Gsta5
29.0824	28.3285	28.8545	28.4968	29.1705	NaN	28.4003	27.8673				12	10	8	50	42.2	32.6	25.914	0	19.725	1839000000	42	P04905	P04905	Glutathione S-transferase Mu 1	Gstm1
33.5625	32.7097	32.9227	32.4683	32.1511	29.6963	33.4107	29.0313				10	10	10	55.2	55.2	55.2	23.439	0	134.41	36194000000	187	P04906	P04906	Glutathione S-transferase P	Gstp1
32.5796	28.7295	32.1877	28.0499	31.0484	30.9066	30.1934	29.9386				55	55	55	36.9	36.9	36.9	272.51	0	323.31	14284000000	171	P04937	P04937	Fibronectin;Anastellin	Fn1
28.5772	29.4692	28.7705	29.0699	29.3796	NaN	28.5586	29.2627				6	6	6	33.3	33.3	33.3	28.748	0	127.22	2021000000	25	P04961	P04961	Proliferating cell nuclear antigen	Pcna
35.1569	36.0657	35.2227	36.2733	35.8383	35.625	35.4251	35.7528				28	28	25	76.9	76.9	67.3	39.351	0	323.31	152620000000	402	P05065;P00884	P05065	Fructose-bisphosphate aldolase A	Aldoa
34.4299	33.8435	34.6497	34.2003	34.0034	33.2214	34.014	33.2316				41	41	41	54	54	54	95.283	0	245.42	79802000000	428	P05197	P05197	Elongation factor 2	Eef2
30.3991	29.123	30.3037	28.7204	30.6398	29.558	29.6192	30.9811				9	9	9	28.6	28.6	28.6	40.829	0	29.594	5252300000	32	P05369	P05369	Farnesyl pyrophosphate synthase	Fdps
32.2732	33.1629	32.5739	33.4538	32.3734	32.3294	32.6623	33.132				26	26	26	59.4	59.4	59.4	59.375	0	194.25	25540000000	227	P05370	P05370	Glucose-6-phosphate 1-dehydrogenase	G6pdx
29.2906	NaN	29.9581	NaN	27.6745	NaN	27.9645	NaN				12	12	12	35.1	35.1	35.1	51.375	0	69.554	2643100000	25	P05371	P05371	Clusterin;Clusterin beta chain;Clusterin alpha chain	Clu
31.6543	31.44	31.7385	31.6839	31.6362	29.7485	31.4217	30.3583				11	11	11	35.8	35.8	35.8	30.329	0	22.395	14718000000	54	P05426	P05426	60S ribosomal protein L7	Rpl7
NaN	NaN	NaN	NaN	NaN	NaN	24.2982	NaN				3	1	1	2.6	0.8	0.8	134.57	0.0024752	0.17454	44763000	1	P05539	P05539	Collagen alpha-1(II) chain;Collagen alpha-1(II) chain;Chondrocalcin	Col2a1
NaN	24.8581	NaN	25.0544	NaN	NaN	NaN	NaN				2	2	2	6.3	6.3	6.3	51.437	0.0010209	0.65641	24353000	4	P05540	P05540	T-cell surface glycoprotein CD4	Cd4
30.9126	30.1229	30.6486	30.8766	30.6855	29.9817	30.5026	31.2161				27	24	24	36.3	32.9	32.9	102.41	0	122.33	7204800000	91	P05708	P05708	Hexokinase-1	Hk1
30.2534	30.1295	30.2882	30.3225	29.8245	28.5873	30.2232	NaN				10	10	10	52.4	52.4	52.4	23.535	0	63.62	5074700000	83	P05712	P05712	Ras-related protein Rab-2A	Rab2a
26.1163	NaN	26.7525	NaN	NaN	NaN	27.5676	NaN				4	2	2	22.9	12.4	12.4	24.408	0.0010086	0.51528	233400000	3	P05714	P05714	Ras-related protein Rab-4A	Rab4a
28.0136	28.3694	28.1555	28.4532	28.1452	NaN	28.1435	NaN				4	4	4	57.8	57.8	57.8	9.1272	0	78.808	1226800000	14	P05765	P05765	40S ribosomal protein S21	Rps21
28.6065	29.5869	29.1151	28.9451	29.1634	28.8648	29.0152	NaN				4	4	4	41.6	41.6	41.6	11.776	0	19.684	1735700000	15	P05942	P05942	Protein S100-A4	S100a4
29.3079	NaN	29.2351	NaN	27.1236	NaN	28.3624	NaN				2	2	2	35.8	35.8	35.8	11.075	0	18.956	2108200000	33	P05943	P05943	Protein S100-A10	S100a10
32.051	29.6524	31.9216	30.6124	32.5243	31.2454	32.3047	31.5236				10	10	10	38	38	38	30.946	0	62.554	12847000000	68	P05982	P05982	NAD(P)H dehydrogenase [quinone] 1	Nqo1
25.5156	NaN	25.6719	NaN	NaN	NaN	NaN	NaN				4	4	4	14.5	14.5	14.5	36.031	0	6.8826	151790000	8	P06214	P06214	Delta-aminolevulinic acid dehydratase	Alad
28.7112	28.3447	29.4517	27.4134	30.6791	30.6661	29.1454	30.8026				7	7	7	35.7	35.7	35.7	12.382	0	52.006	2974900000	45	P06302	P06302	Prothymosin alpha;Prothymosin alpha, N-terminally processed;Thymosin alpha	Ptma
NaN	NaN	NaN	NaN	24.5633	NaN	NaN	NaN				2	2	2	2.8	2.8	2.8	87.555	0.00053879	1.5135	53892000	4	P06536	P06536	Glucocorticoid receptor	Nr3c1
32.7608	32.1425	32.5049	32.365	32.599	31.5455	32.2865	32.302				37	37	23	42.9	42.9	26.3	113.05	0	312.91	22550000000	263	P06685;P09626	P06685	Sodium/potassium-transporting ATPase subunit alpha-1	Atp1a1
NaN	NaN	NaN	NaN	NaN	NaN	NaN	NaN				15	1	0	18.7	1.1	0	112.22	0.0093677	-0.66901	0	1	P06686;P06687;P54708	P06686;P06687	Sodium/potassium-transporting ATPase subunit alpha-2;Sodium/potassium-transporting ATPase subunit alpha-3	Atp1a2;Atp1a3
27.2552	26.9869	26.9706	26.8284	NaN	NaN	27.588	NaN				7	7	7	13.4	13.4	13.4	74.792	0	12.399	636930000	14	P06760	P06760	Beta-glucuronidase	Gusb
34.5238	34.4305	34.6643	34.6812	34.7745	33.8307	34.6166	34.5833				32	30	30	54.9	54.9	54.9	72.346	0	312.4	89286000000	455	P06761	P06761	78 kDa glucose-regulated protein	Hspa5
31.6307	31.8817	31.4543	32.543	32.6015	30.7327	32.3666	32.2472				13	13	13	62.6	62.6	62.6	33.005	0	125.78	16891000000	139	P06762	P06762	Heme oxygenase 1	Hmox1
27.4675	NaN	26.9397	28.2156	NaN	NaN	27.8202	NaN				3	3	3	37.1	37.1	37.1	11.286	0	3.302	490530000	8	P06765	P06765	Platelet factor 4	Pf4
33.9757	31.1418	33.792	30.719	33.3428	30.7075	32.8815	32.2355				21	21	21	65.3	65.3	65.3	38.829	0	282.77	44575000000	190	P07150	P07150	Annexin A1	Anxa1
27.5785	26.5039	29.1702	NaN	NaN	NaN	29.3869	NaN				3	3	3	26.1	26.1	26.1	13.72	0	4.7745	1795400000	14	P07151	P07151	Beta-2-microglobulin	B2m
32.0872	31.3618	32.4731	31.4074	32.0154	31.4246	31.8099	32.1986				28	28	28	53.6	53.6	53.6	68.303	0	119.91	15360000000	161	P07153	P07153	Dolichyl-diphosphooligosaccharide--protein glycosyltransferase subunit 1	Rpn1
27.6568	27.4297	27.8517	28.8175	27.5935	NaN	28.6927	NaN				7	7	7	24.9	24.9	24.9	37.66	0	17.202	1042000000	23	P07154	P07154	Cathepsin L1;Procathepsin L;Cathepsin L1 heavy chain;Cathepsin L1 light chain	Ctsl
NaN	NaN	NaN	NaN	NaN	NaN	25.0185	NaN				2	2	2	4.8	4.8	4.8	61.609	0.0097312	-0.79847	36381000	1	P07314	P07314	Gamma-glutamyltranspeptidase 1;Gamma-glutamyltranspeptidase 1 heavy chain;Gamma-glutamyltranspeptidase 1 light chain	Ggt1
29.8568	29.6673	30.7672	29.3729	29.0808	26.0938	30.3299	NaN				15	13	12	59.4	50.2	47.2	47.14	0	227.22	4730300000	54	P07323	P07323	Gamma-enolase	Eno2
32.2512	33.9989	32.1012	33.632	32.1397	31.67	32.4461	30.6928				15	15	15	55.4	55.4	55.4	42.725	0	277.9	27026000000	217	P07335	P07335	Creatine kinase B-type	Ckb
28.2229	28.4417	27.8213	27.993	28.1164	27.189	27.291	NaN				6	6	6	22	22	22	35.201	0	21.436	1126400000	27	P07340	P07340	Sodium/potassium-transporting ATPase subunit beta-1	Atp1b1
30.2399	27.0152	30.6227	NaN	28.556	NaN	28.5855	NaN				6	6	6	48.9	48.9	48.9	14.775	0	9.709	4205400000	16	P07483	P07483	Fatty acid-binding protein, heart	Fabp3
30.2472	30.4098	30.5492	29.4604	30.2245	31.111	30.295	31.1729				4	4	4	32.5	32.5	32.5	15.911	0	12.314	6519200000	35	P07632	P07632	Superoxide dismutase [Cu-Zn]	Sod1
NaN	NaN	23.6087	NaN	NaN	NaN	NaN	NaN				2	2	2	5.4	5.4	5.4	58.626	0.0038647	-0.14776	42061000	2	P07633	P07633	Propionyl-CoA carboxylase beta chain, mitochondrial	Pccb
28.3928	NaN	28.0595	NaN	27.4811	NaN	27.2614	NaN				8	8	8	24.4	24.4	24.4	52.581	0	8.6255	992430000	17	P07687	P07687	Epoxide hydrolase 1	Ephx1
28.8529	25.7878	29.9224	28.281	29.3374	NaN	30.5413	26.6081				11	11	11	38.7	38.7	38.7	34.973	0	91.56	2752300000	44	P07824	P07824	Arginase-1	Arg1
28.8982	28.9556	28.9114	29.1667	27.7272	27.4011	28.5852	NaN				9	9	9	34.9	34.9	34.9	43.833	0	75.318	1922100000	47	P21775;P07871	P21775;P07871	3-ketoacyl-CoA thiolase A, peroxisomal;3-ketoacyl-CoA thiolase B, peroxisomal	Acaa1a;Acaa1b
27.638	26.975	27.5095	26.6573	27.3429	NaN	27.1458	NaN				11	11	11	24.7	24.7	24.7	74.678	0	30	903210000	18	P07872	P07872	Peroxisomal acyl-coenzyme A oxidase 1;Peroxisomal acyl-CoA oxidase 1, A chain;Peroxisomal acyl-CoA oxidase 1, B chain;Peroxisomal acyl-CoA oxidase 1, C chain	Acox1
32.093	34.834	33.2166	34.7658	34.0609	34.1367	34.039	32.3922				9	9	9	51.4	51.4	51.4	24.674	0	118.92	54156000000	141	P07895	P07895	Superoxide dismutase [Mn], mitochondrial	Sod2
NaN	NaN	NaN	NaN	26.8691	NaN	NaN	NaN				2	2	2	12.8	12.8	12.8	23.603	0	3.0085	13132000	2	P07936	P07936	Neuromodulin	Gap43
32.6715	32.5231	32.523	32.2126	32.6566	32.4878	32.051	32.9585				18	18	18	58.2	58.2	58.2	35.797	0	87.846	26581000000	144	P07943	P07943	Aldose reductase	Akr1b1
NaN	NaN	NaN	NaN	NaN	NaN	22.2325	NaN				8	1	1	42.2	7.3	7.3	25.68	0.00054437	1.6694	33225000	2	P08009	P08009	Glutathione S-transferase Yb-3	Gstm3
31.6319	27.7767	31.4574	27.0376	30.4183	NaN	30.0387	28.8512				13	13	7	59.2	59.2	29.8	25.702	0	77.536	8552800000	55	P08010	P08010	Glutathione S-transferase Mu 2	Gstm2
29.4766	NaN	29.6951	NaN	28.333	NaN	29.0657	NaN				9	9	9	38.2	38.2	38.2	43.031	0	115.12	2505200000	30	P08050	P08050	Gap junction alpha-1 protein	Gja1
30.4775	31.9808	30.5171	30.7647	31.3388	32.024	30.958	33.2126				6	6	6	14.5	14.5	14.5	26.98	0	6.4228	5059700000	36	P08081	P08081	Clathrin light chain A	Clta
28.3812	28.8555	28.2015	27.5626	29.5006	NaN	28.604	28.8392				6	6	6	21	21	21	25.117	0	8.6208	1438700000	15	P08082	P08082	Clathrin light chain B	Cltb
28.1053	27.8962	27.7496	28.7233	26.7954	NaN	28.5153	NaN				8	6	6	16.1	11.9	11.9	60.131	0	8.7235	826750000	27	P08430	P08430	UDP-glucuronosyltransferase 1-6	Ugt1a6
28.5119	28.4449	28.4429	27.8108	27.5802	27.0736	28.1154	NaN				9	9	9	20.9	20.9	20.9	67.165	0	31.673	1341100000	30	P08461	P08461	Dihydrolipoyllysine-residue acetyltransferase component of pyruvate dehydrogenase complex, mitochondrial	Dlat
NaN	NaN	26.7524	NaN	NaN	NaN	27.3466	NaN				2	2	2	21.4	21.4	21.4	12.037	0	2.672	244170000	2	P08494	P08494	Matrix Gla protein	Mgp
26.7176	27.2823	26.7708	26.6168	NaN	26.6175	26.5193	26.921				5	5	5	14.5	14.5	14.5	46.555	0	3.642	401780000	13	P08503	P08503	Medium-chain specific acyl-CoA dehydrogenase, mitochondrial	Acadm
26.6906	NaN	25.7923	25.8539	26.1344	NaN	NaN	NaN				4	4	4	7	7	7	86.703	0	1.9096	269880000	5	P08592	P08592	Amyloid beta A4 protein;N-APP;Soluble APP-alpha;Soluble APP-beta;C99;Beta-amyloid protein 42;Beta-amyloid protein 40;C83;P3(42);P3(40);C80;Gamma-secretase C-terminal fragment 59;Gamma-secretase C-terminal fragment 57;Gamma-secretase C-terminal fragment 50;C31	App
26.7275	26.5855	26.2768	26.5731	26.6847	26.6629	26.3081	NaN				4	2	2	23.8	11.6	11.6	21.656	0	4.3193	359630000	4	P08644	P08644	GTPase KRas;GTPase KRas, N-terminally processed	Kras
29.9488	33.2305	29.4418	32.2607	30.7653	28.6023	30.7595	NaN				7	7	7	22.9	22.9	22.9	27.201	0	23.983	8308600000	65	P08699	P08699	Galectin-3	Lgals3
NaN	NaN	NaN	24.6894	NaN	NaN	NaN	NaN				2	2	2	8.2	8.2	8.2	34.963	0	22.55	25170000	3	P08721	P08721	Osteopontin	Spp1
28.7761	28.3771	28.7777	28.8118	29.4653	NaN	28.2596	NaN				10	6	6	32.8	21.5	21.5	40.522	0	21.263	1831600000	28	P08753	P08753	Guanine nucleotide-binding protein G(k) subunit alpha	Gnai3
NaN	NaN	NaN	NaN	NaN	NaN	26.3433	NaN				2	1	1	3.9	2.5	2.5	70.932	0.0070655	-0.57267	237340000	4	P08934	P08934	Kininogen-1;Kininogen-1 heavy chain;Bradykinin;Kininogen-1 light chain	Kng1
25.7579	NaN	26.8368	NaN	NaN	NaN	NaN	NaN				6	6	6	18.9	18.9	18.9	46.496	0	11.027	277320000	5	P09034	P09034	Argininosuccinate synthase	Ass1
29.3844	27.4793	29.0918	27.86	27.5152	NaN	27.5926	27.637				17	14	14	47.1	37.5	37.5	39.283	0	44.864	2290700000	32	P09117	P09117	Fructose-bisphosphate aldolase C	Aldoc
28.1351	28.7132	28.1098	29.6713	28.2261	NaN	28.4538	28.6188				17	17	17	25.6	25.6	25.6	77.519	0	12.557	1304300000	35	P09215;Q9WTQ0	P09215	Protein kinase C delta type;Protein kinase C delta type regulatory subunit;Protein kinase C delta type catalytic subunit	Prkcd
25.1038	NaN	25.0618	24.9819	NaN	NaN	24.7844	NaN				7	2	2	28.9	8.8	8.8	34.813	0	2.8203	128530000	6	P09330	P09330	Ribose-phosphate pyrophosphokinase 2	Prps2
29.3404	29.0937	29.4229	29.0665	28.8208	28.8348	29.0486	28.8541				12	12	12	33.3	33.3	33.3	43.094	0	19.207	2884800000	34	P09456;P81377	P09456	cAMP-dependent protein kinase type I-alpha regulatory subunit;cAMP-dependent protein kinase type I-alpha regulatory subunit, N-terminally processed	Prkar1a
33.2746	32.0949	33.4166	31.1747	32.9454	32.3157	32.0933	33.3476				19	14	12	51.6	40.7	40.7	28.509	0	162.73	29270000000	119	P09495	P09495	Tropomyosin alpha-4 chain	Tpm4
31.8527	32.2999	31.7276	32.4178	31.5747	30.3972	32.0601	30.4106				13	13	13	69.6	69.6	69.6	23.504	0	162.41	14625000000	137	P09527	P09527	Ras-related protein Rab-7a	Rab7a
30.5679	32.1841	30.0239	31.179	30.5741	30.9793	30.6818	28.8649				12	12	12	35.4	35.4	35.4	42.267	0	165.48	6840200000	100	P09606	P09606	Glutamine synthetase	Glul
29.9791	30.6839	30.7272	31.6875	30.2979	28.9989	30.4739	29.0774				26	26	21	36.6	36.6	31.1	97.482	0	68.708	5274400000	110	P09811	P09811	Glycogen phosphorylase, liver form	Pygl
31.9051	31.346	32.3306	31.5043	31.2225	30.4632	31.6805	30.1881				12	12	12	43.1	43.1	43.1	34.458	0	60.478	14608000000	116	P09895	P09895	60S ribosomal protein L5	Rpl5
24.6245	NaN	26.0369	24.878	NaN	NaN	NaN	NaN				4	4	4	29	29	29	20.762	0	4.5042	200440000	4	P0C0A1	P0C0A1	Vacuolar protein-sorting-associated protein 25	Vps25
NaN	NaN	NaN	NaN	NaN	NaN	23.8937	NaN				4	4	4	3.3	3.3	3.3	152.44	0.0033915	-0.088967	57922000	5	P0C0R5	P0C0R5	Phosphoinositide 3-kinase regulatory subunit 4	Pik3r4
28.7846	29.0676	29.4259	28.1759	29.1407	NaN	28.7831	NaN				4	2	2	31.2	18.8	18.8	13.553	0	2.7549	1936400000	22	P0C0S7	P0C0S7	Histone H2A.Z	H2afz
27.3156	29.9736	27.1834	30.3239	27.6336	27.9031	28.2378	27.4106				11	11	11	24.6	24.6	24.6	59.829	0	29.821	1141600000	28	P0C1Q3	P0C1Q3	Lysophosphatidylcholine acyltransferase 2	Lpcat2
NaN	27.2961	NaN	27.1315	26.134	NaN	NaN	NaN				2	2	2	3	3	3	73.771	0.0033948	-0.07751	108560000	2	P0C1S9	P0C1S9	Sn1-specific diacylglycerol lipase beta	Daglb
NaN	NaN	24.9457	NaN	NaN	NaN	NaN	NaN				2	2	2	2.7	2.7	2.7	103.76	0.0010304	0.78626	95701000	3	P0C1X8	P0C1X8	AP2-associated protein kinase 1	Aak1
26.8555	NaN	26.2288	NaN	26.9313	NaN	25.5277	NaN				5	5	5	6.4	6.4	6.4	98.223	0	2.0425	311780000	5	P0C219	P0C219	Sarcolemmal membrane-associated protein	Slmap
27.5685	27.3738	27.7081	26.8783	27.3719	NaN	26.9578	NaN				7	7	7	19	19	19	61.868	0	40.59	717230000	10	P0C2X9	P0C2X9	Delta-1-pyrroline-5-carboxylate dehydrogenase, mitochondrial	Aldh4a1
30.2477	25.1245	30.2554	24.9647	29.5257	26.4849	26.9927	NaN				16	16	16	37.3	37.3	37.3	66.704	0	57.97	3485700000	55	P0C5E3	P0C5E3	Palladin	Palld
29.1439	29.3543	29.6235	28.8707	28.3999	28.2423	28.9288	28.2012				9	9	9	44.1	44.1	44.1	20.388	0	18.976	2434200000	39	P0C5H9	P0C5H9	Mesencephalic astrocyte-derived neurotrophic factor	Manf
27.7879	27.6409	27.7902	27.6713	27.5502	NaN	27.9098	NaN				8	8	8	10.5	10.5	10.5	102.8	0	13.87	901570000	20	P0C5W1	P0C5W1	Microtubule-associated protein 1S;MAP1S heavy chain;MAP1S light chain	Map1s
30.0267	26.248	30.1587	27.6317	28.9723	27.3819	28.0291	27.488				19	16	11	41.5	37.8	26.5	70.184	0	89.324	3170600000	50	P0DMW1;P0DMW0	P0DMW1;P0DMW0	Heat shock 70 kDa protein 1B;Heat shock 70 kDa protein 1A	Hspa1a
26.6617	25.9419	26.1654	25.9722	26.3189	NaN	26.0035	NaN				2	2	2	33.3	33.3	33.3	6.9981	0.0010178	0.60841	305550000	4	P0DN35	P0DN35
33.3544	32.5719	33.6452	32.7399	31.5624	31.8194	32.7481	30.7218				10	10	10	61	61	61	17.874	0	144.42	37630000000	137	P10111	P10111	Peptidyl-prolyl cis-trans isomerase A;Peptidyl-prolyl cis-trans isomerase A, N-terminally processed	Ppia
NaN	26.84	NaN	27.0318	NaN	NaN	26.478	NaN				3	3	3	18.8	18.8	18.8	27.679	0.0056818	-0.45214	171470000	4	P10252	P10252	CD48 antigen	Cd48
28.8873	29.2681	29.044	29.698	27.2036	NaN	28.9451	NaN				8	5	5	58.2	39.3	39.3	22.163	0	84.614	1951400000	24	P10536	P10536	Ras-related protein Rab-1B	Rab1b
26.354	NaN	26.1699	NaN	24.7503	NaN	25.3036	NaN				6	6	6	6.8	6.8	6.8	148.55	0	2.0253	271510000	7	P10686	P10686	1-phosphatidylinositol 4,5-bisphosphate phosphodiesterase gamma-1	Plcg1
27.7011	26.7439	27.3603	26.7987	26.0372	NaN	26.7057	NaN				12	12	12	25.7	25.7	25.7	85.961	0	58.371	651240000	24	P10688	P10688	1-phosphatidylinositol 4,5-bisphosphate phosphodiesterase delta-1	Plcd1
33.2078	33.0153	33.2348	32.7034	32.321	31.2579	33.0366	31.0355				23	23	23	60.1	60.1	60.1	56.353	0	208.86	34174000000	274	P10719	P10719	ATP synthase subunit beta, mitochondrial	Atp5b
31.3307	31.8535	31.1072	32.1027	32.0237	31.6065	31.5079	31.7176				19	19	19	49.5	49.5	49.5	47.538	0	76.385	11865000000	99	P10760	P10760	Adenosylhomocysteinase	Ahcy
27.2076	NaN	27.0848	NaN	NaN	NaN	NaN	NaN				2	2	2	40.5	40.5	40.5	12.301	0.0024655	0.13425	416330000	4	P10818	P10818	Cytochrome c oxidase subunit 6A1, mitochondrial	Cox6a1
31.9742	32.6643	32.0656	32.8936	32.2018	31.5632	32.0799	31.8256				20	20	20	42.7	42.7	42.7	61.415	0	131.46	17310000000	185	P10860	P10860	Glutamate dehydrogenase 1, mitochondrial	Glud1
29.7477	31.2873	29.4291	31.2538	31.0809	31.0693	30.0431	30.3032				7	7	7	36.7	36.7	36.7	19.514	0	19.156	4904900000	54	P10888	P10888	Cytochrome c oxidase subunit 4 isoform 1, mitochondrial	Cox4i1
31.9779	33.2356	32.1151	32.3541	32.4583	33.6248	31.8735	32.6411				17	17	17	35.9	35.9	35.9	61.123	0	59.687	20486000000	122	P10960	P10960	Sulfated glycoprotein 1	Psap
28.2521	28.4058	28.6122	28.0804	NaN	NaN	27.9697	NaN				2	2	2	39.1	39.1	39.1	10.027	0	10.18	1388400000	16	P11030	P11030	Acyl-CoA-binding protein;Triakontatetraneuropeptide;Octadecaneuropeptide	Dbi
25.8515	25.3285	28.3571	27.6146	24.358	NaN	26.5496	NaN				2	2	2	3.7	3.7	3.7	53.962	0	4.9158	967740000	11	P11167	P11167	Solute carrier family 2, facilitated glucose transporter member 1	Slc2a1
30.9721	30.4356	32.2465	30.947	30.2351	32.5176	30.7311	32.353				6	6	6	49.5	49.5	49.5	11.673	0	7.6201	6700400000	37	P11232	P11232	Thioredoxin	Txn
28.9015	NaN	28.9872	28.853	28.3783	NaN	27.8101	NaN				2	2	2	7.7	7.7	7.7	13.507	0.0024522	0.095343	1843200000	6	P11250	P11250	60S ribosomal protein L34	Rpl34
NaN	NaN	NaN	NaN	NaN	NaN	NaN	35.2546				3	1	1	8.2	1.7	1.7	54.114	0.0061292	-0.51184	8227800000	1	P11275	P11275	Calcium/calmodulin-dependent protein kinase type II subunit alpha	Camk2a
24.394	NaN	24.338	NaN	NaN	NaN	NaN	NaN				3	2	2	5.1	3.5	3.5	72.927	0.0005291	1.2915	73300000	3	P11345	P11345	RAF proto-oncogene serine/threonine-protein kinase	Raf1
27.3953	27.5203	27.9328	27.6917	26.9063	27.0401	27.5661	NaN				6	6	6	37.3	37.3	37.3	25.552	0	25.49	1003000000	17	P11348	P11348	Dihydropteridine reductase	Qdpr
34.9829	34.923	34.979	35.13	34.6049	34.3778	34.8282	34.442				75	75	75	54.8	54.8	54.8	191.6	0	323.31	115440000000	730	P11442	P11442	Clathrin heavy chain 1	Cltc
NaN	NaN	24.5275	NaN	NaN	NaN	NaN	NaN				4	4	4	2.3	2.3	2.3	265.19	0	3.8008	62618000	1	P11497	P11497	Acetyl-CoA carboxylase 1;Biotin carboxylase	Acaca
29.6986	30.2227	29.4707	30.4669	29.9967	29.4009	30.0464	30.1726				23	23	16	26.1	26.1	17.5	138.72	0	94.181	4053000000	96	P11505;P11506;Q64568	P11505	Plasma membrane calcium-transporting ATPase 1	Atp2b1
31.9731	31.7029	31.967	31.963	32.0225	31.2901	31.9137	32.1768				37	37	37	43.7	43.7	43.7	114.77	0	253.05	17069000000	207	P11507;Q64578;P18596	P11507	Sarcoplasmic/endoplasmic reticulum calcium ATPase 2	Atp2a2
NaN	NaN	27.2708	NaN	NaN	NaN	NaN	NaN				2	2	2	0.9	0.9	0.9	425.82	0.00054054	1.5757	484360000	3	P11530	P11530	Dystrophin	Dmd
34.8411	34.2403	35.1152	34.2721	34.8043	33.5026	34.9094	33.6017				34	34	34	63.8	63.8	63.8	56.623	0	323.31	115140000000	443	P11598	P11598	Protein disulfide-isomerase A3	Pdia3
27.174	25.6838	26.7705	27.1418	26.0348	NaN	26.7827	NaN				7	4	4	17.6	10.1	10.1	59.037	0	3.1855	305030000	5	P11730;P08413	P11730;P08413	Calcium/calmodulin-dependent protein kinase type II subunit gamma;Calcium/calmodulin-dependent protein kinase type II subunit beta	Camk2g;Camk2b
31.5947	27.902	32.3053	26.6341	31.248	30.5178	30.4239	31.0571				9	9	9	71.9	71.9	71.9	14.857	0	48.228	12834000000	65	P11762	P11762	Galectin-1	Lgals1
31.6411	31.6369	31.3828	31.3624	30.7897	29.2192	31.6153	31.2533				17	17	16	41	41	39.5	56.488	0	105.39	9972000000	126	P11884;Q63639;Q66HF8	P11884	Aldehyde dehydrogenase, mitochondrial	Aldh2
27.0375	27.1525	27.5882	NaN	26.8182	NaN	26.4361	NaN				4	4	4	8.6	8.6	8.6	58.813	0	13.12	611990000	13	P11915	P11915	Non-specific lipid-transfer protein	Scp2
NaN	NaN	NaN	NaN	NaN	NaN	NaN	30.3023				3	3	3	27.6	27.6	27.6	8.4548	0	3.7646	162930000	2	P11951;P11950	P11951	Cytochrome c oxidase subunit 6C-2	Cox6c2
35.7091	35.654	35.6816	35.4251	35.051	34.1123	35.5579	34.2835				35	35	35	66.5	66.5	66.5	57.817	0	323.31	169050000000	500	P11980;P12928	P11980	Pyruvate kinase PKM	Pkm
31.0266	31.0142	31.2493	31.3878	30.8203	29.3982	30.732	NaN				6	6	6	37.2	37.2	37.2	21.658	0	35.874	9976100000	50	P12001	P12001	60S ribosomal protein L18	Rpl18
26.2764	27.3903	26.364	26.8801	27.2854	NaN	27.1154	NaN				4	4	4	10.4	10.4	10.4	46.435	0	3.0413	448550000	9	P12007	P12007	Isovaleryl-CoA dehydrogenase, mitochondrial	Ivd
27.9241	28.8163	27.9942	28.2539	28.747	NaN	27.9474	NaN				4	4	4	30.2	30.2	30.2	13.915	0	3.783	1155200000	30	P12075	P12075	Cytochrome c oxidase subunit 5B, mitochondrial	Cox5b
28.0166	28.5579	27.7524	28.25	28.0764	NaN	27.7943	28.5087				9	9	8	30.2	30.2	26.4	45.54	0	25.698	1105800000	26	P12368	P12368	cAMP-dependent protein kinase type II-alpha regulatory subunit	Prkar2a
25.9803	NaN	25.8486	NaN	NaN	NaN	NaN	NaN				5	4	4	19.7	16.1	16.1	46.122	0	10.008	196650000	5	P12369	P12369	cAMP-dependent protein kinase type II-beta regulatory subunit	Prkar2b
29.8898	28.436	29.9698	28.4937	29.8839	26.9287	29.7452	28.5377				12	12	12	40.4	40.4	40.4	39.575	0	45.104	3947300000	53	P12711;P41682	P12711	Alcohol dehydrogenase class-3	Adh5
29.7382	29.2889	29.8362	28.9603	28.9914	NaN	29.5798	30.2752				5	5	5	19.3	19.3	19.3	17.277	0	4.0237	3303200000	19	P12749	P12749	60S ribosomal protein L26	Rpl26
31.1559	30.149	31.2404	29.8319	30.2723	28.3233	30.3052	29.6407				51	51	51	27.5	27.5	27.5	272.65	0	215.81	7368600000	130	P12785	P12785	Fatty acid synthase;[Acyl-carrier-protein] S-acetyltransferase;[Acyl-carrier-protein] S-malonyltransferase;3-oxoacyl-[acyl-carrier-protein] synthase;3-oxoacyl-[acyl-carrier-protein] reductase;3-hydroxyacyl-[acyl-carrier-protein] dehydratase;Enoyl-[acyl-carrier-protein] reductase;Oleoyl-[acyl-carrier-protein] hydrolase	Fasn
31.4474	30.705	31.5527	30.3631	31.4385	30.8964	30.9395	31.5556				7	7	7	37	37	37	32.56	0	104.42	9631300000	47	P13084	P13084	Nucleophosmin	Npm1
29.2282	28.6409	29.1848	28.3947	29.2318	NaN	28.9564	NaN				6	6	6	21.1	21.1	21.1	36.148	0	20.266	2583800000	37	P13086	P13086	Succinyl-CoA ligase [ADP/GDP-forming] subunit alpha, mitochondrial	Suclg1
30.7347	30.0178	30.6051	30.0744	29.8672	28.9955	29.7865	28.3996				15	15	15	48.9	48.9	48.9	46.428	0	65.033	5892800000	82	P13221	P13221	Aspartate aminotransferase, cytoplasmic	Got1
27.2854	26.9001	28.0674	27.2849	29.0292	27.9815	28.7348	28.0051				7	7	7	21.4	21.4	21.4	47.268	0	44.067	1070600000	28	P13233	P13233	2,3-cyclic-nucleotide 3-phosphodiesterase	Cnp
27.4738	27.7957	27.3479	27.4413	28.25	NaN	27.3118	27.5816				5	5	5	9.8	9.8	9.8	74.023	0	8.4822	662980000	19	P13264	P13264	Glutaminase kidney isoform, mitochondrial;Glutaminase kidney isoform 68 kDa chain;Glutaminase kidney isoform 65 kDa chain	Gls
31.4221	31.6243	31.501	31.051	31.8199	30.7155	31.6666	31.0073				17	17	17	26.6	26.6	26.6	77.146	0	125.25	12006000000	105	P13383	P13383	Nucleolin	Ncl
29.6134	29.5035	29.0805	28.1282	28.8359	27.1221	29.1253	27.6147				12	12	12	40.1	40.1	40.1	41.87	0	66.642	2261200000	30	P13437	P13437	3-ketoacyl-CoA thiolase, mitochondrial	Acaa2
NaN	NaN	NaN	NaN	NaN	NaN	23.5534	NaN				3	2	2	9.8	6	6	43.697	0	3.7168	76974000	4	P13444	P13444	S-adenosylmethionine synthase isoform type-1	Mat1a
30.3914	29.2501	30.9388	29.4008	30.2735	28.3239	30.2407	NaN				6	6	6	39.1	39.1	39.1	16.259	0	38.391	5722800000	50	P13471	P13471	40S ribosomal protein S14	Rps14
26.6736	NaN	25.9904	NaN	NaN	NaN	25.7854	NaN				3	3	3	13.9	13.9	13.9	40.168	0	6.4387	274090000	12	P13599	P13599	IgG receptor FcRn large subunit p51	Fcgrt
NaN	NaN	26.4525	NaN	NaN	NaN	NaN	NaN				3	2	2	5.2	3.6	3.6	54.559	0.0010015	0.35926	258130000	4	P13601;P51647	P13601;P51647	Aldehyde dehydrogenase, cytosolic 1;Retinal dehydrogenase 1	Aldh1a7;Aldh1a1
28.3212	24.9132	30.8185	24.8623	27.2495	NaN	28.0355	NaN				21	21	20	25.5	25.5	24.5	120.84	0	113.14	3174400000	44	P13635	P13635	Ceruloplasmin	Cp
25.8008	26.4389	26.0925	25.447	26.6148	NaN	NaN	NaN				5	5	3	28.9	28.9	22.1	17.288	0	5.185	349160000	11	P13668	P13668	Stathmin	Stmn1
28.222	28.2435	28.004	28.0893	28.1654	NaN	27.9198	NaN				11	11	11	22.5	22.5	22.5	81.383	0	32.028	1115800000	23	P13676	P13676	Acylamino-acid-releasing enzyme	Apeh
29.349	27.2988	28.6149	27.0246	27.774	NaN	28.3496	NaN				14	14	14	31.8	31.8	31.8	64.002	0	94.325	1468200000	31	P13697	P13697	NADP-dependent malic enzyme	Me1
28.2103	28.2458	28.6513	27.3621	28.8709	26.832	28.663	26.517				7	7	7	29.4	29.4	29.4	34.951	0	19.238	1519900000	31	P13803	P13803	Electron transfer flavoprotein subunit alpha, mitochondrial	Etfa
32.9371	30.9402	32.9254	30.7656	31.4266	31.6894	31.3444	30.8016				10	10	2	62.8	62.8	22.1	19.895	0	190.84	25128000000	102	P13832	P13832	Myosin regulatory light chain RLC-A	Rlc-a
31.5952	27.5753	29.5168	26.9682	32.9076	31.4977	28.631	28.0553				37	37	31	40.3	40.3	35	138.93	0	183.66	6197400000	105	P13941	P13941	Collagen alpha-1(III) chain	Col3a1
25.6905	25.5503	25.6619	25.7634	NaN	NaN	25.4267	NaN				4	4	3	7.5	7.5	5.8	67.551	0.0010091	0.5154	204330000	4	P14056	P14056	Serine/threonine-protein kinase A-Raf	Araf
29.7194	30.7185	29.6325	30.5545	30.1671	30.0811	30.3447	30.1229				12	12	12	35.7	35.7	35.7	54.463	0	124.46	4504300000	77	P14408	P14408	Fumarate hydratase, mitochondrial	Fh
32.5927	33.2049	31.9647	33.044	33.6464	31.1931	32.9971	30.6974				5	5	5	13.8	13.8	13.8	43.969	0	9.7892	21958000000	45	P14562	P14562	Lysosome-associated membrane glycoprotein 1	Lamp1
28.6729	28.5151	28.8141	28.2308	28.5911	NaN	28.7181	NaN				8	8	8	32.8	32.8	32.8	31.516	0	22.927	1604400000	29	P14604	P14604	Enoyl-CoA hydratase, mitochondrial	Echs1
26.3431	NaN	26.2855	NaN	NaN	NaN	NaN	NaN				14	5	5	23.9	10.9	10.9	69.641	0	9.6272	240930000	4	P14659	P14659	Heat shock-related 70 kDa protein 2	Hspa2
33.1591	33.1922	32.8111	33.7727	33.2381	32.3997	33.0268	31.8225				17	17	17	59.9	59.9	59.9	35.744	0	75.367	30510000000	146	P14668	P14668	Annexin A5	Anxa5
31.5277	33.391	31.6548	33.2466	33.0664	33.2265	32.7835	33.5933				25	25	25	61.7	61.7	61.7	36.363	0	238.16	24658000000	275	P14669	P14669	Annexin A3	Anxa3
NaN	NaN	NaN	NaN	NaN	NaN	22.9249	NaN				2	2	2	4.1	4.1	4.1	81.622	0	2.1647	32917000	3	P14882	P14882	Propionyl-CoA carboxylase alpha chain, mitochondrial	Pcca
30.0629	29.9581	30.7318	30.6122	29.7713	28.5395	29.9337	29.101				19	19	19	44.1	44.1	44.1	57.126	0	49.532	5483100000	74	P15178	P15178	Aspartate--tRNA ligase, cytoplasmic	Dars
27.0856	NaN	27.1205	NaN	26.3591	NaN	25.2394	NaN				10	10	10	5.5	5.5	5.5	269.5	0	9.6592	429860000	12	P15205	P15205	Microtubule-associated protein 1B;MAP1B heavy chain;MAP1 light chain LC1	Map1b
25.5909	27.5193	25.714	27.8568	27.5963	NaN	26.5993	26.6524				5	5	5	8.8	8.8	8.8	62.678	0	2.0806	328240000	8	P15589	P15589	Steryl-sulfatase	Sts
29.6484	30.1726	30.2689	30.4104	30.1642	29.4856	30.1623	29.7129				16	16	16	41.6	41.6	41.6	47.872	0	42.189	4533400000	73	P15650	P15650	Long-chain specific acyl-CoA dehydrogenase, mitochondrial	Acadl
26.9842	26.7492	27.3583	26.8427	26.7872	NaN	27.0212	26.5995				10	10	10	31.8	31.8	31.8	44.765	0	43.039	683460000	21	P15651	P15651	Short-chain specific acyl-CoA dehydrogenase, mitochondrial	Acads
30.9378	29.4833	31.018	29.421	30.3819	NaN	30.7267	28.6823				20	20	20	29.2	29.2	29.2	109.45	0	284.73	6722900000	94	P15684	P15684	Aminopeptidase N	Anpep
29.7695	29.4117	30.3827	29.0933	28.8842	26.951	29.743	28.4896				12	12	9	27.8	27.8	20.3	60.08	0	21.033	3637200000	38	P15791	P15791	Calcium/calmodulin-dependent protein kinase type II subunit delta	Camk2d
33.0168	33.8286	32.7941	33.5815	33.8763	32.9836	33.1051	33.2159				7	7	5	24.7	24.7	20.1	21.987	0	16.38	40139000000	76	P15865;P06349	P15865	Histone H1.4	Hist1h1e
26.3056	NaN	28.5666	NaN	27.1764	NaN	28.3498	NaN				6	2	2	20.1	7.2	7.2	36.57	0	5.666	896470000	15	P15978	P15978	Class I histocompatibility antigen, Non-RT1.A alpha-1 chain	RT1-Aw2
32.84	33.1099	32.946	32.9196	32.953	32.1412	32.8045	32.3122				21	21	21	44.8	44.8	44.8	59.753	0	248.33	28567000000	198	P15999	P15999	ATP synthase subunit alpha, mitochondrial	Atp5a1
31.4785	31.6914	31.5463	31.7746	31.5101	31.5336	31.2717	31.5627				9	9	9	28.1	28.1	28.1	39.445	0	55.917	10886000000	76	P16036	P16036	Phosphate carrier protein, mitochondrial	Slc25a3
33.27	27.0158	32.9472	24.9979	32.6856	25.7077	32.6173	27.9628				110	110	110	53.3	53.3	53.3	284.63	0	323.31	27103000000	328	P16086	P16086	Spectrin alpha chain, non-erythrocytic 1	Sptan1
25.5014	NaN	27.2822	NaN	NaN	NaN	26.1551	NaN				4	4	4	15.6	15.6	15.6	31.883	0	7.3339	343210000	8	P16232	P16232	Corticosteroid 11-beta-dehydrogenase isozyme 1	Hsd11b1
30.0182	30.5425	31.5744	31.3474	30.7854	29.2823	31.5303	29.7878				11	11	7	27.8	27.8	19.4	41.83	0	22.132	9251000000	51	P16391	P16391	RT1 class I histocompatibility antigen, AA alpha chain
29.5175	NaN	29.4424	NaN	NaN	NaN	28.7621	NaN				3	2	2	12	8	8	22.156	0	1.8175	2548200000	14	P16409;P02600	P16409;P02600	Myosin light chain 3;Myosin light chain 1/3, skeletal muscle isoform	Myl3;Myl1
29.6166	29.3124	29.7801	29.9513	28.7431	28.3713	29.9011	29.0974				12	12	11	49.8	49.8	46.5	31.907	0	14.552	4106400000	38	P16446	P16446	Phosphatidylinositol transfer protein alpha isoform	Pitpna
34.2429	34.3059	34.5314	34.6044	33.8268	32.2035	34.3037	32.0973				21	21	21	59.7	59.7	59.7	44.538	0	272.68	81362000000	277	P16617	P16617	Phosphoglycerate kinase 1	Pgk1
27.4431	NaN	27.4629	NaN	27.2197	NaN	26.7907	NaN				9	9	9	31.1	31.1	31.1	46.558	0	46.515	586630000	18	P16636	P16636	Protein-lysine 6-oxidase	Lox
30.6522	29.1129	30.8855	29.1622	30.0931	28.5267	30.3055	28.7728				25	25	25	28.7	28.7	28.7	120.63	0	85.617	5850900000	103	P16638	P16638	ATP-citrate synthase	Acly
27.061	NaN	27.5573	NaN	NaN	NaN	NaN	NaN				6	6	6	10.5	10.5	10.5	75.315	0	7.3454	515210000	6	P16970	P16970	ATP-binding cassette sub-family D member 3	Abcd3
31.1696	25.1513	31.0784	24.5346	29.6944	NaN	27.867	NaN				10	10	10	35.9	35.9	35.9	34.296	0	49.398	6012600000	53	P16975	P16975	SPARC	Sparc
31.0512	32.59	31.0735	32.3164	32.704	30.9996	31.8204	29.1763				5	5	5	10.5	10.5	10.5	45.155	0	2.05	9245500000	33	P17046	P17046	Lysosome-associated membrane glycoprotein 2	Lamp2
29.8943	29.3071	30.4795	29.4971	29.1393	27.0966	29.5696	NaN				6	6	6	29.7	29.7	29.7	16.085	0	9.5011	4508500000	36	P17074	P17074	40S ribosomal protein S19	Rps19
30.8594	29.8517	30.9975	30.178	30.8695	28.4615	30.6506	29.4168				7	7	7	49	49	49	21.893	0	51.442	7202800000	36	P17077	P17077	60S ribosomal protein L9	Rpl9
28.3688	28.3332	27.9387	27.8798	29.0197	26.9805	28.6123	NaN				8	8	8	24	24	24	53.486	0	37.941	1297800000	37	P17164	P17164	Tissue alpha-L-fucosidase	Fuca1
29.4213	28.9077	29.7995	28.3779	28.9885	28.8069	28.6165	29.2021				6	6	6	31.6	31.6	31.6	25.926	0	36.996	2211400000	26	P17220	P17220	Proteasome subunit alpha type-2	Psma2
28.3454	NaN	28.2313	NaN	27.5775	NaN	27.9095	NaN				11	11	11	24.4	24.4	24.4	57.433	0	16.159	1041400000	22	P17425	P17425	Hydroxymethylglutaryl-CoA synthase, cytoplasmic	Hmgcs1
24.9215	NaN	25.4436	26.0434	NaN	NaN	25.812	NaN				3	3	3	10.7	10.7	10.7	36.398	0	2.5097	150840000	7	P17431	P17431	Zinc finger protein 36, C3H1 type-like 1	Zfp36l1
NaN	NaN	NaN	NaN	NaN	NaN	NaN	29.1149				2	2	2	15.3	15.3	15.3	15.848	0	3.0682	1647300000	5	P17702	P17702	60S ribosomal protein L28	Rpl28
28.6633	28.187	29.1776	27.6063	27.4936	NaN	28.3634	28.6102				10	10	10	35.6	35.6	35.6	44.695	0	22.816	1505500000	32	P17764	P17764	Acetyl-CoA acetyltransferase, mitochondrial	Acat1
25.7949	25.8341	26.1578	NaN	NaN	NaN	25.8026	NaN				3	3	3	9.1	9.1	9.1	53.396	0	29.729	216680000	6	P17955	P17955	Nuclear pore glycoprotein p62	Nup62
26.5891	27.0789	27.5356	28.3695	26.2663	NaN	27.4636	26.9221				11	9	9	19.7	16.9	16.9	78.178	0	23.869	619220000	22	P18163	P18163	Long-chain-fatty-acid--CoA ligase 1	Acsl1
NaN	NaN	NaN	NaN	NaN	NaN	22.9007	NaN				3	1	1	7.2	3.5	3.5	51.026	0.0056926	-0.43788	35208000	2	P18265	P18265	Glycogen synthase kinase-3 alpha	Gsk3a
27.1144	27.2263	26.8934	27.5737	NaN	NaN	27.0271	NaN				6	6	4	24	24	19.8	46.742	0	6.2956	575030000	10	P18266	P18266	Glycogen synthase kinase-3 beta	Gsk3b
NaN	NaN	NaN	NaN	NaN	NaN	25.0583	NaN				7	1	1	10.4	1.9	1.9	70.411	0.0097267	-0.80005	73668000	1	P18292	P18292	Prothrombin;Activation peptide fragment 1;Activation peptide fragment 2;Thrombin light chain;Thrombin heavy chain	F2
27.0471	27.8903	27.1621	28.6938	27.5998	26.6979	27.6264	NaN				5	5	4	15.2	15.2	11.4	43.715	0	4.5463	747070000	13	P18298	P18298	S-adenosylmethionine synthase isoform type-2	Mat2a
28.575	28.2317	29.059	28.2661	28.9558	27.7161	28.2744	28.3471				15	15	15	21.9	21.9	21.9	88.894	0	22.515	1979800000	42	P18395	P18395	Cold shock domain-containing protein E1	Csde1
34.8013	33.6906	34.8029	34.1461	34.3186	33.4735	34.7384	33.3116				16	16	16	45.7	45.7	45.7	47.995	0	323.31	75980000000	334	P18418	P18418	Calreticulin	Calr
30.114	30.1872	30.1684	30.2871	31.1588	NaN	30.2966	NaN				9	9	9	38.8	38.8	38.8	29.517	0	40.245	5487400000	59	P18420	P18420	Proteasome subunit alpha type-1	Psma1
30.3385	30.3291	30.7283	30.6575	30.2326	29.2343	30.3935	28.1722				9	9	9	43.8	43.8	43.8	26.479	0	40.763	6084300000	48	P18421	P18421	Proteasome subunit beta type-1	Psmb1
30.0186	30.1709	30.0958	30.1799	30.1745	29.1808	29.8426	28.1491				8	8	8	33.3	33.3	33.3	28.419	0	54.544	4144100000	51	P18422	P18422	Proteasome subunit alpha type-3	Psma3
30.8501	29.9461	30.9189	30.3857	29.4354	27.6489	29.7592	28.654				5	5	5	28.4	28.4	28.4	16.618	0	9.6158	6457500000	49	P18445	P18445	60S ribosomal protein L27a	Rpl27a
31.9523	31.2062	31.8832	31.6037	31.8013	29.6064	31.8052	30.6409				35	35	35	41.5	41.5	41.5	104.04	0	126.8	11941000000	188	P18484	P18484	AP-2 complex subunit alpha-2	Ap2a2
25.6621	28.646	34.7868	31.3957	24.4522	NaN	33.9648	26.0553				34	34	27	60.9	60.9	47.7	74.468	0	323.31	57422000000	202	P18588	P18588	Interferon-induced GTP-binding protein Mx1	Mx1
NaN	NaN	NaN	NaN	NaN	NaN	NaN	28.7551				30	1	1	47.5	1.8	1.8	75.073	0	4.3818	7099000000	10	P18589	P18589	Interferon-induced GTP-binding protein Mx2	Mx2
27.9808	29.8686	34.8164	32.3265	28.3309	28.9892	34.3892	30.3307				31	24	2	51.1	38.1	5.5	74.951	0	231.64	61953000000	155	P18590	P18590	Interferon-induced GTP-binding protein Mx3	Mx3
26.0229	NaN	26.3818	NaN	27.1811	NaN	26.7079	NaN				5	5	5	4.9	4.9	4.9	130.81	0	3.0115	292370000	7	P18614	P18614	Integrin alpha-1	Itga1
26.6139	27.7882	27.1605	27.4409	26.6971	26.2933	26.9579	NaN				6	6	6	24.8	24.8	24.8	38.224	0	7.1407	621200000	15	P18645	P18645	UDP-glucose 4-epimerase	Gale
28.6905	NaN	29.2093	NaN	NaN	NaN	26.0648	NaN				10	2	0	51.2	10.5	0	19.838	0	4.3502	1542200000	8	P18666	P18666	Myosin regulatory light chain 12B	Myl12b
24.3794	NaN	24.0478	NaN	NaN	NaN	NaN	NaN				2	2	2	6	6	6	43.605	0.0057007	-0.42623	52939000	2	P18757	P18757	Cystathionine gamma-lyase	Cth
25.9844	NaN	25.9241	NaN	NaN	NaN	25.4092	NaN				3	3	3	6.8	6.8	6.8	74.109	0	6.9404	206850000	5	P18886	P18886	Carnitine O-palmitoyltransferase 2, mitochondrial	Cpt2
32.014	33.4818	33.4257	34.27	32.7679	32.6574	33.9858	33.4705				10	10	10	54.9	54.9	54.9	21.126	0	48.499	40212000000	150	P19132	P19132	Ferritin heavy chain;Ferritin heavy chain, N-terminally processed	Fth1
29.2371	28.2813	29.4453	28.5641	27.9063	NaN	28.6805	NaN				16	16	16	55.5	55.5	55.5	45.073	0	78.089	2436800000	56	P19139	P19139	Casein kinase II subunit alpha	Csnk2a1
26.3454	26.2996	26.0584	24.8985	NaN	26.0297	24.8707	NaN				4	4	4	21.8	21.8	21.8	27.378	0	3.1414	283310000	8	P19234	P19234	NADH dehydrogenase [ubiquinone] flavoprotein 2, mitochondrial	Ndufv2
25.3086	24.9244	25.8289	24.912	NaN	NaN	NaN	NaN				3	3	3	10.8	10.8	10.8	39.361	0.0010411	0.96755	171810000	4	P19356	P19356	Porphobilinogen deaminase	Hmbs
29.7345	30.486	29.3734	30.3273	29.3704	28.8142	29.5559	28.7986				21	21	21	43.5	43.5	43.5	72.618	0	67.36	3418600000	94	P19468	P19468	Glutamate--cysteine ligase catalytic subunit	Gclc
30.2903	30.8958	30.2702	30.9183	30.7714	30.3874	30.5688	NaN				8	8	8	27.7	27.7	27.7	28.868	0	95.965	6395400000	50	P19511	P19511	ATP synthase F(0) complex subunit B1, mitochondrial	Atp5f1
NaN	NaN	NaN	NaN	NaN	NaN	23.9602	NaN				2	1	1	3.1	1.5	1.5	61.335	0.0010395	0.94786	217090000	1	P19527	P19527	Neurofilament light polypeptide	Nefl
33.1211	33.2861	33.3517	33.1822	33.2375	31.9394	32.6045	31.6092				12	12	5	75	75	44.1	17.283	0	146.76	39047000000	150	P19804	P19804	Nucleoside diphosphate kinase B	Nme2
25.3024	27.2951	25.4079	26.7394	25.3621	NaN	26.024	NaN				4	4	4	17.4	17.4	17.4	41.68	0	4.7712	263590000	8	P19836;Q9QZC4	P19836;Q9QZC4	Choline-phosphate cytidylyltransferase A;Choline-phosphate cytidylyltransferase B	Pcyt1a;Pcyt1b
28.6692	NaN	29.7417	25.1987	NaN	NaN	26.6321	NaN				2	2	2	51.8	51.8	51.8	11.498	0	9.4018	2014600000	6	P19944	P19944	60S acidic ribosomal protein P1	Rplp1
32.2133	32.1513	32.3961	32.5408	32.1265	31.2122	32.0943	30.5113				7	7	7	34.1	34.1	34.1	34.215	0	63.766	19094000000	80	P19945	P19945	60S acidic ribosomal protein P0	Rplp0
25.3759	25.3531	25.112	25.3829	25.3633	NaN	25.1651	NaN				3	3	3	5.2	5.2	5.2	58.607	0.0010199	0.63716	154110000	4	P20069	P20069	Mitochondrial-processing peptidase subunit alpha	Pmpca
29.3911	28.7872	29.3106	28.9408	29.1794	NaN	29.2655	NaN				12	12	12	47.8	47.8	47.8	34.174	0	100.01	2530200000	47	P20070	P20070	NADH-cytochrome b5 reductase 3;NADH-cytochrome b5 reductase 3 membrane-bound form;NADH-cytochrome b5 reductase 3 soluble form	Cyb5r3
29.4979	26.8767	30.1484	27.9604	NaN	NaN	27.8494	NaN				3	3	3	27.5	27.5	27.5	18.465	0	7.8033	2933900000	18	P20280	P20280	60S ribosomal protein L21	Rpl21
27.3389	27.979	27.5134	28.1446	28.4894	NaN	27.5634	NaN				4	4	4	25.5	25.5	25.5	18.07	0.001991	0.26827	774710000	8	P20291	P20291	Arachidonate 5-lipoxygenase-activating protein	Alox5ap
NaN	31.49	NaN	31.3558	30.1194	NaN	30.4955	NaN				2	2	2	23.3	23.3	23.3	9.7644	0	3.2435	2768000000	11	P20411	P20411	High affinity immunoglobulin epsilon receptor subunit gamma	Fcer1g
27.7586	28.5108	28.0665	29.8892	28.0835	27.264	28.7073	27.6996				11	11	11	34	34	34	49.674	0	21.349	1536800000	45	P20417	P20417	Tyrosine-protein phosphatase non-receptor type 1	Ptpn1
29.2783	28.8392	28.9955	28.7656	27.858	NaN	29.6577	NaN				9	9	9	18.9	18.9	18.9	48.319	0	26.817	2063500000	45	P20611	P20611	Lysosomal acid phosphatase	Acp2
26.1383	26.1824	26.1926	NaN	NaN	NaN	26.326	NaN				6	6	5	19.1	19.1	16.5	42.416	0	6.2268	352610000	12	P20650	P20650	Protein phosphatase 1A	Ppm1a
NaN	NaN	NaN	NaN	NaN	NaN	20.8326	NaN				6	1	1	12.8	3.2	3.2	59.113	0	4.6929	21886000	2	P20651	P20651	Serine/threonine-protein phosphatase 2B catalytic subunit beta isoform	Ppp3cb
28.9254	29.1536	29.1492	29.6077	29.5258	28.5549	29.4632	27.9052				15	15	15	36	36	36	51.549	0	46.193	2218500000	53	P20673	P20673	Argininosuccinate lyase	Asl
27.119	27.688	27.1178	27.559	27.619	27.0316	27.4382	27.4387				5	5	5	20.8	20.8	20.8	29.445	0	26.113	674940000	16	P20788	P20788	Cytochrome b-c1 complex subunit Rieske, mitochondrial;Cytochrome b-c1 complex subunit 11	Uqcrfs1
NaN	NaN	NaN	NaN	NaN	NaN	NaN	24.8141				2	2	2	3.4	3.4	3.4	56.51	0.0093284	-0.71789	311760000	6	P20812	P20812	Cytochrome P450 2A3	Cyp2a3
29.8498	NaN	27.0322	26.0483	27.9793	NaN	26.6249	NaN				20	20	17	17.4	17.4	15.6	181.02	0	41.15	1127700000	25	P20909	P20909	Collagen alpha-1(XI) chain	Col11a1
25.7798	24.8849	24.8815	24.3059	NaN	NaN	NaN	NaN				7	7	7	8.1	8.1	8.1	115.97	0.0024728	0.17239	146440000	5	P21139	P21139	Alpha-mannosidase 2C1	Man2c1
26.1781	NaN	26.2194	NaN	29.0196	NaN	27.5466	NaN				8	8	8	6.2	6.2	6.2	208.79	0	27.191	441280000	17	P21263	P21263	Nestin	Nes
NaN	NaN	25.6768	NaN	NaN	NaN	NaN	NaN				3	3	3	13.1	13.1	13.1	31.502	0	5.964	120780000	2	P21272	P21272	CCAAT/enhancer-binding protein beta	Cebpb
29.6303	30.6418	29.643	30.4933	29.9054	28.6172	29.8567	29.3898				14	14	14	33.5	33.5	33.5	59.507	0	50.299	3701400000	74	P21396	P21396	Amine oxidase [flavin-containing] A	Maoa
31.2829	30.3724	31.7187	30.8222	30.7613	30.3669	30.8312	30.1718				11	11	11	32.3	32.3	32.3	46.135	0	81.919	10578000000	83	P21531	P21531	60S ribosomal protein L3	Rpl3
31.6101	30.6464	31.8589	31.1572	31.5913	NaN	30.5279	30.7611				11	11	11	34.6	34.6	34.6	33.561	0	67.334	12422000000	62	P21533	P21533	60S ribosomal protein L6	Rpl6
27.1504	27.3564	27.2525	27.4374	26.424	NaN	27.2021	NaN				3	3	3	36.1	36.1	36.1	12.494	0	2.1863	665740000	8	P21571	P21571	ATP synthase-coupling factor 6, mitochondrial	Atp5j
NaN	NaN	NaN	NaN	NaN	NaN	23.1286	NaN				5	1	1	6.4	2.1	2.1	97.294	0	1.9619	5306000	1	P21575	P21575	Dynamin-1	Dnm1
26.867	27.8243	26.3598	28.0485	27.5477	26.7036	27.262	NaN				6	6	6	12.8	12.8	12.8	63.968	0	8.1903	483070000	15	P21588	P21588	5-nucleotidase	Nt5e
30.1733	30.3075	29.999	30.1424	30.1515	30.3324	29.904	30.3687				8	8	8	44.4	44.4	44.4	29.497	0	150.19	5001000000	62	P21670	P21670	Proteasome subunit alpha type-4	Psma4
28.7788	30.2477	28.7565	30.3377	29.5779	29.1424	29.1466	28.4139				12	8	8	37.4	25.3	25.3	43.08	0	16.341	2695800000	42	P21708;Q63454;P27704	P21708	Mitogen-activated protein kinase 3	Mapk3
NaN	NaN	NaN	NaN	NaN	NaN	26.2057	NaN				3	1	1	11.2	5.6	5.6	20.756	0	8.9914	289520000	4	P21818	P21818	Stathmin-2	Stmn2
27.5152	28.5429	27.2411	27.6842	27.9944	26.7091	26.1826	NaN				9	9	9	35.8	35.8	35.8	31.83	0	18.07	769830000	25	P21913	P21913	Succinate dehydrogenase [ubiquinone] iron-sulfur subunit, mitochondrial	Sdhb
27.0114	27.2769	27.2305	27.3786	NaN	NaN	26.9393	NaN				6	6	6	43.6	43.6	43.6	24.641	0	27.747	687820000	10	P22062	P22062	Protein-L-isoaspartate(D-aspartate) O-methyltransferase	Pcmt1
NaN	NaN	NaN	23.8195	NaN	NaN	NaN	NaN				3	3	3	8.7	8.7	8.7	27.057	0.0043228	-0.24417	17487000	3	P22288	P22288	GTP cyclohydrolase 1	Gch1
28.4326	28.6011	28.9021	28.256	28.9845	NaN	28.3705	28.2925				9	9	9	31.2	31.2	31.2	34.221	0	10.54	1140500000	17	P22509	P22509	rRNA 2-O-methyltransferase fibrillarin	Fbl
29.1533	30.6324	29.3435	30.0771	29.4395	28.2707	29.358	27.4806				10	10	10	51.5	51.5	51.5	29.597	0	65.261	3157100000	52	P22734	P22734	Catechol O-methyltransferase	Comt
24.5517	NaN	25.9536	NaN	NaN	NaN	26.3587	NaN				6	6	6	4.7	4.7	4.7	146.24	0	3.8169	190070000	7	P22985	P22985	Xanthine dehydrogenase/oxidase;Xanthine dehydrogenase;Xanthine oxidase	Xdh
NaN	26.5659	NaN	NaN	NaN	NaN	NaN	NaN				3	3	3	3	3	3	136.63	0.0010188	0.62141	138250000	5	P23347;P23348	P23347	Anion exchange protein 2	Slc4a2
30.9908	30.135	31.5969	30.4401	30.6575	29.1529	30.6829	29.2863				6	6	6	54.5	54.5	54.5	17.845	0	25.119	8279800000	57	P23358	P23358	60S ribosomal protein L12	Rpl12
31.5607	31.2258	31.7281	31.4895	31.3249	30.1899	31.1619	31.1166				31	31	31	43.5	43.5	43.5	107.01	0	102.91	11552000000	160	P23514	P23514	Coatomer subunit beta	Copb1
25.3977	24.916	25.2214	24.8497	25.1339	NaN	NaN	NaN				3	3	2	12.7	12.7	9	25.068	0.001993	0.27213	96101000	5	P23640	P23640	Ras-related protein Rab-27A	Rab27a
26.1372	NaN	26.4077	NaN	NaN	NaN	25.6156	NaN				5	5	5	21.3	21.3	21.3	35.762	0	6.7407	303890000	9	P23711	P23711	Heme oxygenase 2	Hmox2
28.5722	30.78	28.6335	30.1861	29.8478	29.5252	29.494	28.9044				13	13	13	34.2	34.2	34.2	63.369	0	61.87	2756000000	57	P23785	P23785	Granulins;Acrogranin;Granulin-1;Granulin-2;Granulin-3;Granulin-4;Granulin-5;Granulin-6;Granulin-7	Grn
26.6591	NaN	25.9513	NaN	NaN	NaN	NaN	NaN				4	4	4	18.3	18.3	18.3	20.089	0.001002	0.36781	247720000	4	P23928	P23928	Alpha-crystallin B chain	Cryab
29.4932	28.746	29.5399	28.5226	29.0162	NaN	29.5596	28.5524				9	9	9	33.6	33.6	33.6	32.254	0	28.706	2691600000	39	P23965	P23965	Enoyl-CoA delta isomerase 1, mitochondrial	Eci1
30.7356	27.6687	30.7521	28.8743	28.0894	NaN	29.6523	26.9063				6	6	6	41.3	41.3	41.3	21.397	0	14.852	5095100000	44	P24049	P24049	60S ribosomal protein L17	Rpl17
31.2488	29.9225	31.0301	29.8585	30.1894	29.066	30.2948	30.0097				9	9	9	39.2	39.2	39.2	22.878	0	49.876	6719700000	31	P24050	P24050	40S ribosomal protein S5;40S ribosomal protein S5, N-terminally processed	Rps5
30.0192	28.9573	29.7886	29.0169	29.2959	NaN	29.6986	NaN				4	4	2	39.3	39.3	14.3	9.4771	0	6.6408	3441700000	19	P24051	P24051	40S ribosomal protein S27-like	Rps27l
NaN	26.5456	25.9096	27.5247	25.3051	NaN	25.7567	NaN				7	7	7	5.8	5.8	5.8	147.73	0.001022	0.6598	239860000	8	P24135	P24135	1-phosphatidylinositol 4,5-bisphosphate phosphodiesterase gamma-2	Plcg2
27.6939	27.1303	27.6595	26.8898	27.7398	NaN	27.3258	NaN				8	8	8	14.7	14.7	14.7	78.385	0	38.163	689970000	17	P24155	P24155	Thimet oligopeptidase	Thop1
32.7564	33.8512	32.3528	32.9341	33.1353	31.2098	33.1543	29.018				13	13	13	36.1	36.1	36.1	44.68	0	80.069	29746000000	128	P24268	P24268	Cathepsin D;Cathepsin D 12 kDa light chain;Cathepsin D 9 kDa light chain;Cathepsin D 34 kDa heavy chain;Cathepsin D 30 kDa heavy chain	Ctsd
32.288	31.512	32.5617	31.6896	32.0767	30.7031	31.9322	30.8474				11	11	11	53.7	53.7	53.7	23.802	0	41.768	21665000000	125	P24368	P24368	Peptidyl-prolyl cis-trans isomerase B	Ppib
25.5475	26.472	25.7363	26.4489	25.0958	NaN	25.17	NaN				4	4	4	22.6	22.6	22.6	25.493	0	5.0791	175760000	10	P24473	P24473	Glutathione S-transferase kappa 1	Gstk1
28.5703	25.3169	29.843	26.2163	27.642	NaN	29.156	NaN				5	5	5	46.6	46.6	46.6	20.282	0	38.127	2418200000	19	P25086	P25086	Interleukin-1 receptor antagonist protein	Il1rn
NaN	NaN	NaN	NaN	NaN	NaN	23.488	NaN				2	2	2	4.8	4.8	4.8	45.975	0.00053967	1.5574	61636000	3	P25093	P25093	Fumarylacetoacetase	Fah
33.2921	33.0425	33.3781	33.6526	33.0169	32.4992	33.2824	32.5741				12	12	12	52	52	52	28.832	0	80.163	40934000000	176	P25113;P16290	P25113	Phosphoglycerate mutase 1	Pgam1
31.486	30.3445	31.7031	30.6746	30.3942	29.3321	31.2133	30.2379				19	19	19	36.8	36.8	36.8	69.077	0	264.81	10939000000	127	P25235	P25235	Dolichyl-diphosphooligosaccharide--protein glycosyltransferase subunit 2	Rpn2
29.6505	30.3681	29.6399	30.8032	30.1866	29.9027	29.6858	29.7658				20	20	20	26.5	26.5	26.5	96.327	0	104.14	4158100000	106	P25286	P25286	V-type proton ATPase 116 kDa subunit a isoform 1	Atp6v0a1
25.1243	NaN	25.399	NaN	NaN	NaN	25.1094	NaN				5	5	5	8.2	8.2	8.2	89.436	0	2.205	139600000	4	P25977	P25977	Nucleolar transcription factor 1	Ubtf
27.9151	29.3214	29.0745	30.9722	28.774	28.8662	29.8107	30.0656				6	6	6	14.1	14.1	14.1	55.945	0	55.252	1880400000	30	P26051	P26051	CD44 antigen	Cd44
28.303	28.9221	28.7234	28.5281	29.0093	27.6609	28.335	29.5625				9	9	9	30.5	30.5	30.5	43.226	0	17.376	1329300000	30	P26284	P26284	Pyruvate dehydrogenase E1 component subunit alpha, somatic form, mitochondrial	Pdha1
30.1137	NaN	31.1969	26.8686	28.5667	NaN	30.9458	NaN				5	5	5	48.2	48.2	48.2	14.971	0	76.926	6231800000	35	P26376	P26376	Interferon-induced transmembrane protein 3	ifitm3
29.2699	27.9666	29.6427	29.9942	29.6568	28.5501	30.2991	30.9452				8	8	8	23.2	23.2	23.2	42.435	0	19.398	3254200000	38	P26453	P26453	Basigin	Bsg
28.6894	29.3031	28.7459	29.2145	29.2693	29.6163	28.5891	29.4946				5	5	5	52.9	52.9	52.9	10.902	0	4.1082	1888800000	20	P26772	P26772	10 kDa heat shock protein, mitochondrial	Hspe1
25.4532	28.458	25.6422	28.557	25.7942	NaN	25.8811	NaN				7	7	7	11	11	11	79.784	0	3.4975	395950000	12	P26817;P26819	P26817	Beta-adrenergic receptor kinase 1	Adrbk1
27.3159	28.5957	27.6439	27.582	27.9082	NaN	27.3247	28.1618				12	12	12	16.4	16.4	16.4	112.66	0	21.05	948230000	26	P27008	P27008	Poly [ADP-ribose] polymerase 1	Parp1
24.8826	26.9625	NaN	27.3806	24.733	NaN	25.418	NaN				2	2	2	13.5	13.5	13.5	29.113	0.0010142	0.57252	185180000	6	P27139	P27139	Carbonic anhydrase 2	Ca2
NaN	NaN	25.8022	NaN	NaN	NaN	NaN	NaN				2	2	2	15.9	15.9	15.9	13.79	0.0089118	-0.64604	199000000	1	P27274	P27274	CD59 glycoprotein	Cd59
24.3644	25.3951	NaN	24.3476	NaN	NaN	25.0898	NaN				2	2	2	3.8	3.8	3.8	77.312	0	4.8585	86981000	5	P27321	P27321	Calpastatin	Cast
32.0948	32.5761	32.1588	32.3606	30.9181	31.2948	31.6389	31.5522				12	12	12	65.6	65.6	65.6	24.477	0	39.042	15334000000	120	P27605	P27605	Hypoxanthine-guanine phosphoribosyltransferase	Hprt1
30.6472	30.0301	30.4261	30.1996	30.2036	28.0921	30.4084	29.4543				8	8	8	18.2	18.2	18.2	54.09	0	71.554	5536600000	42	P27615	P27615	Lysosome membrane protein 2	Scarb2
NaN	27.2938	NaN	28.9563	NaN	NaN	26.3684	NaN				5	4	4	12	7.9	7.9	30.281	0	4.0107	289680000	8	P27645	P27645	Low affinity immunoglobulin gamma Fc region receptor III	Fcgr3
29.2421	28.7192	29.1268	28.3528	28.6497	NaN	28.4591	29.1266				13	13	13	15.7	15.7	15.7	100.99	0	19.682	1729900000	35	P27653	P27653	C-1-tetrahydrofolate synthase, cytoplasmic;Methylenetetrahydrofolate dehydrogenase;Methenyltetrahydrofolate cyclohydrolase;Formyltetrahydrofolate synthetase;C-1-tetrahydrofolate synthase, cytoplasmic, N-terminally processed	Mthfd1
NaN	NaN	NaN	NaN	NaN	NaN	23.7208	NaN				3	1	1	8.8	3.4	3.4	40.619	0	2.1764	92173000	2	P27791	P27791	cAMP-dependent protein kinase catalytic subunit alpha	Prkaca
30.5473	31.0952	30.5376	31.2786	30.0847	29.7245	31.1108	28.9225				30	30	26	37.3	37.3	32.4	102.54	0	103.82	6047500000	132	P27881	P27881	Hexokinase-2	Hk2
28.789	31.2988	29.0814	31.5314	30.0839	30.0794	30.5717	31.7266				18	16	16	27.5	24.7	24.7	100.25	0	144.92	3855800000	62	P27926	P27926	Hexokinase-3	Hk3
31.896	30.7359	32.018	30.7409	30.7588	30.0864	30.6482	29.424				11	11	11	43.3	43.3	43.3	31.231	0	25.951	12238000000	64	P27952	P27952	40S ribosomal protein S2	Rps2
29.7982	29.6527	29.8981	29.8498	29.7977	29.6918	29.2594	30.3054				23	23	23	25.5	25.5	25.5	141.93	0	77.347	2888300000	47	P28023	P28023	Dynactin subunit 1	Dctn1
26.395	26.5763	25.8278	NaN	NaN	NaN	26.5856	27.7526				5	5	5	43	43	43	17.455	0	27.804	304730000	10	P28042	P28042	Single-stranded DNA-binding protein, mitochondrial	Ssbp1
27.1488	27.5948	28.386	28.3922	27.2649	NaN	27.9082	27.1118				10	10	10	48.6	48.6	48.6	30.569	0	36.467	1280800000	25	P28064	P28064	Proteasome subunit beta type-8	Psmb8
27.3991	28.9535	27.4835	27.8547	NaN	NaN	28.0206	29.3346				4	4	4	17.2	17.2	17.2	25.289	0	25.702	958370000	21	P28073	P28073	Proteasome subunit beta type-6	Psmb6
30.3141	30.3602	29.9582	30.0385	30.0666	29.6632	29.8917	30.4909				9	9	9	41.8	41.8	41.8	28.585	0	28.155	4035700000	37	P28075	P28075	Proteasome subunit beta type-5	Psmb5
27.3185	27.9877	28.4624	NaN	NaN	NaN	27.7161	NaN				3	3	3	14.2	14.2	14.2	23.324	0	2.8947	1080300000	6	P28077	P28077	Proteasome subunit beta type-9	Psmb9
31.5863	31.5627	31.6543	31.5523	31.8282	30.7308	31.1137	31.4066				24	24	24	53.1	53.1	53.1	60.359	0	110.03	12934000000	129	P28480	P28480	T-complex protein 1 subunit alpha	Tcp1
28.8655	28.0965	28.448	27.261	28.0421	NaN	27.6001	NaN				19	19	19	21.8	21.8	21.8	131.24	0	109.74	1619900000	40	P28494	P28494	Alpha-mannosidase 2	Man2a1
25.9041	NaN	26.264	NaN	NaN	NaN	NaN	NaN				2	2	2	16	16	16	25.698	0	10.377	239300000	8	P28648	P28648	CD63 antigen	Cd63
NaN	29.2024	26.7708	28.398	27.8989	NaN	27.406	NaN				6	6	6	21.1	21.1	21.1	47.019	0	13.544	583680000	10	P29066	P29066	Beta-arrestin-1	Arrb1
24.936	28.0795	25.1202	28.2214	25.5248	NaN	25.8426	NaN				5	5	5	16.6	16.6	16.6	46.34	0	8.9518	316830000	9	P29067	P29067	Beta-arrestin-2	Arrb2
26.6006	27.269	27.1493	27.2715	25.9777	NaN	27.2364	NaN				5	5	5	19	19	19	38.201	0	15.38	529680000	17	P29147	P29147	D-beta-hydroxybutyrate dehydrogenase, mitochondrial	Bdh1
27.6665	27.4629	27.5452	27.1459	28.0753	NaN	27.0169	27.2829				7	7	7	32.8	32.8	32.8	35.302	0	31.448	824510000	15	P29266	P29266	3-hydroxyisobutyrate dehydrogenase, mitochondrial	Hibadh
31.72	31.2248	32.0371	31.5584	31.3237	29.7073	30.9275	28.9761				11	11	11	37.6	37.6	37.6	22.591	0	6.2587	13464000000	77	P29314	P29314	40S ribosomal protein S9	Rps9
31.3081	31.3816	31.6963	31.2615	31.2646	30.7406	31.0358	31.4883				21	21	21	69.3	69.3	69.3	49.974	0	291.77	11066000000	110	P29315	P29315	Ribonuclease inhibitor	Rnh1
28.1008	28.7813	28.308	28.8652	28.2653	28.7724	28.6455	28.9164				8	8	8	41.4	41.4	41.4	26.379	0	14.68	1421500000	32	P29410	P29410	Adenylate kinase 2, mitochondrial;Adenylate kinase 2, mitochondrial, N-terminally processed	Ak2
28.0503	28.2183	28.1609	28.0299	28.4975	NaN	28.1848	NaN				8	8	8	40.1	40.1	40.1	25.438	0	11.409	1085900000	25	P29411	P29411	GTP:AMP phosphotransferase AK3, mitochondrial	Ak3
27.1873	29.1954	27.6087	28.7146	28.2486	26.5289	28.2186	25.7841				3	3	3	43.7	43.7	43.7	8.2545	0	2.7835	1086500000	13	P29419	P29419	ATP synthase subunit e, mitochondrial	Atp5i
34.1427	28.597	34.2716	28.0655	33.4268	28.3796	33.0936	31.4144				21	21	21	54.2	54.2	54.2	46.517	0	207.31	57696000000	176	P29457	P29457	Serpin H1	Serpinh1
24.9776	NaN	28.8457	32.0177	25.0894	NaN	29.7543	28.2424				11	11	11	37	37	37	47.247	0	77.338	2861000000	49	P29524	P29524	Plasminogen activator inhibitor 2 type A	Serpinb2
30.5514	NaN	28.3948	NaN	NaN	NaN	26.3439	NaN				3	3	3	14.5	14.5	14.5	28.856	0	102.12	2550600000	10	P29975	P29975	Aquaporin-1	Aqp1
26.9559	NaN	26.4229	NaN	NaN	NaN	25.8389	NaN				10	10	10	4.3	4.3	4.3	313.26	0	10.181	341810000	11	P29994;Q63269	P29994	Inositol 1,4,5-trisphosphate receptor type 1	Itpr1
NaN	NaN	NaN	25.5933	NaN	NaN	NaN	NaN				3	3	3	1.6	1.6	1.6	307.05	0	1.7258	117280000	3	P29995	P29995	Inositol 1,4,5-trisphosphate receptor type 2	Itpr2
31.0807	33.0108	30.9133	33.1608	32.242	33.4651	31.6533	34.5992				17	17	17	67.6	67.6	67.6	29.794	0	273.04	14517000000	147	P30009	P30009	Myristoylated alanine-rich C-kinase substrate	Marcks
NaN	NaN	25.5756	NaN	NaN	NaN	25.4372	NaN				2	2	2	9.7	9.7	9.7	23.793	0.0024546	0.10774	113350000	2	P30120	P30120	Metalloproteinase inhibitor 1	Timp1
NaN	NaN	27.4992	29.7685	NaN	NaN	27.8482	28.4874				3	3	3	19.2	19.2	19.2	22.475	0	3.7935	636140000	6	P30152	P30152	Neutrophil gelatinase-associated lipocalin	Lcn2
30.2601	30.7892	30.1753	31.1026	30.4312	29.7266	30.9958	29.2668				18	18	18	35.6	35.6	35.6	69.175	0	79.908	5127700000	117	P30349	P30349	Leukotriene A-4 hydrolase	Lta4h
34.3422	30.6006	33.8248	30.7985	34.1124	29.1216	33.4664	32.0196				190	190	190	46.5	46.5	46.5	533.53	0	323.31	55344000000	581	P30427	P30427	Plectin	Plec
26.0658	24.9944	25.9089	25.2761	25.4433	NaN	26.1221	NaN				2	2	2	9.4	9.4	9.4	27.439	0.0010373	0.90974	339200000	4	P30713	P30713	Glutathione S-transferase theta-2	Gstt2
30.6989	30.3209	31.2149	30.9033	29.5891	28.4729	30.6036	NaN				19	17	15	30.9	27.3	24.7	85.338	0	126.7	7951700000	107	P30835	P30835	ATP-dependent 6-phosphofructokinase, liver type	Pfkl
28.9043	28.7575	29.2432	29.057	29.0213	28.5543	29.254	29.4338				12	12	11	30.6	30.6	28.1	54.081	0	34.514	2711300000	52	P30839	P30839	Fatty aldehyde dehydrogenase	Aldh3a2
NaN	NaN	28.7902	NaN	NaN	NaN	NaN	NaN				3	3	3	47	47	47	12.477	0	4.2444	1156900000	11	P30904	P30904	Macrophage migration inhibitory factor	Mif
27.7374	27.822	27.7486	27.3301	29.0708	NaN	28.1441	NaN				4	4	4	13.3	13.3	13.3	37.167	0	6.2899	1106200000	22	P30919	P30919	N(4)-(Beta-N-acetylglucosaminyl)-L-asparaginase;Glycosylasparaginase alpha chain;Glycosylasparaginase beta chain	Aga
36.9512	35.1812	37.0922	34.3283	37.4345	35.4046	36.7015	35.9543				50	50	45	85.6	85.6	79.8	53.732	0	323.31	393450000000	752	P31000;P21807;CON__Q9NSB2;CON__Q6ISB0;P23565;P12839	P31000	Vimentin	Vim
30.2774	29.7098	30.4637	28.8906	29.1702	28.8111	29.6147	26.1553				8	8	8	74.3	74.3	74.3	20.801	0	192.41	5281100000	67	P31044	P31044	Phosphatidylethanolamine-binding protein 1;Hippocampal cholinergic neurostimulating peptide	Pebp1
34.4183	29.0537	34.6727	NaN	33.767	31.7825	32.0743	30.1287				15	15	15	58.7	58.7	58.7	22.603	0	80.397	71678000000	146	P31232	P31232	Transgelin	Tagln
29.2841	30.2762	29.2253	29.5164	30.2528	NaN	29.4292	NaN				7	7	7	60.9	60.9	60.9	18.763	0	38.023	2789600000	30	P31399	P31399	ATP synthase subunit d, mitochondrial	Atp5h
25.6996	NaN	25.7347	NaN	25.899	NaN	26.4105	NaN				3	3	3	9.3	9.3	9.3	45.522	0	2.3632	201230000	7	P31430	P31430	Dipeptidase 1	Dpep1
26.0219	28.1796	25.0226	27.804	27.7132	NaN	26.9059	NaN				2	2	2	4.7	4.7	4.7	69.868	0	8.7773	355220000	10	P31643	P31643	Sodium- and chloride-dependent taurine transporter	Slc6a6
28.5056	28.2396	29.5862	29.0558	28.9296	28.0149	28.942	30.8685				21	12	12	35	23.5	23.5	69.39	0	30.672	2112800000	34	P31977	P31977	Ezrin	Ezr
27.0469	26.5803	27.9331	26.6729	27.8987	NaN	27.1058	NaN				6	6	6	20.3	20.3	20.3	33.835	0	3.5315	347950000	14	P32089	P32089	Tricarboxylate transport protein, mitochondrial	Slc25a1
28.8246	28.5482	28.4908	29.1422	27.0221	NaN	29.262	27.6194				12	12	12	18.2	18.2	18.2	88.124	0	28.123	1643300000	32	P32198;Q63704	P32198	Carnitine O-palmitoyltransferase 1, liver isoform	Cpt1a
25.3645	NaN	26.3666	NaN	NaN	NaN	24.9275	NaN				2	2	2	8	8	8	40.452	0	22.928	204260000	3	P32362	P32362	Uroporphyrinogen decarboxylase	Urod
29.857	29.6067	29.7098	29.4331	29.8122	29.0958	29.5847	28.9615				13	13	13	36.9	36.9	36.9	48.396	0	80.343	3443100000	61	P32551	P32551	Cytochrome b-c1 complex subunit 2, mitochondrial	Uqcrc2
27.157	28.2932	26.9707	28.8686	26.9652	27.42	27.4386	NaN				10	10	10	30.7	30.7	30.7	50.746	0	9.1213	708080000	21	P32577;P41243	P32577	Tyrosine-protein kinase CSK	Csk
25.3611	NaN	25.4725	NaN	NaN	NaN	25.0144	NaN				3	3	3	6.9	6.9	6.9	74.149	0	7.144	141490000	5	P33436	P33436	72 kDa type IV collagenase;PEX	Mmp2
34.5176	34.8629	34.6345	34.9986	34.8475	34.6143	34.569	35.2407				38	36	24	52.9	51.2	36.5	83.28	0	323.31	110380000000	600	P34058	P34058	Heat shock protein HSP 90-beta	Hsp90ab1
30.0423	30.2415	30.3643	30.0921	29.0286	26.91	30.2589	25.8423				7	7	7	35.3	35.3	35.3	26.391	0	27.679	4276700000	40	P34064	P34064	Proteasome subunit alpha type-5	Psma5
29.7341	29.9636	29.9173	29.915	29.8832	30.6798	29.8754	30.4583				6	6	6	31.2	31.2	31.2	29.197	0	34.026	4073800000	40	P34067	P34067	Proteasome subunit beta type-4	Psmb4
NaN	NaN	NaN	NaN	NaN	NaN	NaN	25.3755				2	2	2	9.4	9.4	9.4	21.962	0.0056872	-0.44689	22428000	2	P34901	P34901	Syndecan-4	Sdc4
28.6292	27.573	28.6133	NaN	27.5301	NaN	27.2395	NaN				14	14	14	7	7	7	299.53	0	15.326	1066600000	20	P34926	P34926	Microtubule-associated protein 1A;MAP1A heavy chain;MAP1 light chain LC2	Map1a
28.7709	29.0809	28.9804	28.9058	29.2297	28.5506	28.7856	NaN				2	2	2	27.7	27.7	27.7	9.3529	0	3.8742	1996500000	13	P35171	P35171	Cytochrome c oxidase subunit 7A2, mitochondrial	Cox7a2
32.3345	33.0303	32.1764	32.8243	32.947	32.5957	32.3491	33.5586				14	9	7	67.9	53.3	46.7	28.054	0	125.02	22523000000	102	P35213	P35213	14-3-3 protein beta/alpha;14-3-3 protein beta/alpha, N-terminally processed	Ywhab
28.3265	29.6432	29.0752	29.9113	29.2778	29.3361	28.8836	29.2432				5	4	3	25.6	20.3	16.4	23.668	0	19.503	1782100000	28	P35280	P35280	Ras-related protein Rab-8A	Rab8a
27.6823	27.7017	27.8105	28.205	27.306	NaN	27.5155	NaN				5	3	3	26	17	17	22.858	0	7.2577	752890000	11	P35281	P35281	Ras-related protein Rab-10	Rab10
25.549	25.9144	25.9452	26.059	25.577	NaN	25.8077	NaN				3	3	3	14.8	14.8	14.8	27.271	0	3.8975	222760000	7	P35284	P35284	Ras-related protein Rab-12	Rab12
NaN	NaN	NaN	NaN	NaN	NaN	26.2382	NaN				5	3	2	24.6	15.3	11.8	22.901	0	15.133	352430000	7	P35286	P35286	Ras-related protein Rab-13	Rab13
NaN	25.1728	NaN	26.0914	NaN	NaN	NaN	NaN				2	2	2	16.8	16.8	16.8	22.245	0	5.3902	34585000	2	P35332	P35332	Hippocalcin-like protein 4	Hpcal4
26.8913	NaN	30.0642	30.8546	27.259	NaN	30.0654	28.6362				16	15	15	34.3	32.8	32.8	69.163	0	42.184	3313300000	60	P35355	P35355	Prostaglandin G/H synthase 2	Ptgs2
25.822	NaN	25.3829	NaN	NaN	NaN	NaN	NaN				4	3	3	14.2	11.6	11.6	33.799	0	3.46	151870000	5	P35426	P35426	Cyclin-dependent kinase 4	Cdk4
30.5232	29.8794	30.9574	30.5183	29.9428	NaN	30.0526	28.9462				7	7	7	30.5	30.5	30.5	23.476	0	16.54	6788500000	51	P35427	P35427	60S ribosomal protein L13a	Rpl13a
29.895	29.6226	29.7141	29.6869	29.1263	28.0465	29.3959	29.2569				7	7	7	28.9	28.9	28.9	30.19	0	14.225	3416100000	40	P35435	P35435	ATP synthase subunit gamma, mitochondrial	Atp5c1
NaN	NaN	25.0174	NaN	NaN	NaN	NaN	NaN				7	2	2	17.1	6.1	6.1	60.577	0	6.4989	66008000	2	P35465	P35465	Serine/threonine-protein kinase PAK 1	Pak1
28.7542	29.1792	29.0893	28.9682	29.057	28.6758	28.7623	28.7015				24	24	24	26.9	26.9	26.9	117.71	0	17.372	2145800000	53	P35559	P35559	Insulin-degrading enzyme	Ide
32.2596	31.8298	32.2745	32.5471	32.3438	31.8398	32.3964	32.3722				22	22	22	34.9	34.9	34.9	67.254	0	148.12	20671000000	197	P35565	P35565	Calnexin	Canx
29.2351	29.9446	29.2183	30.2294	29.4973	29.0366	29.4012	29.4601				24	24	24	40.4	40.4	40.4	80.972	0	35.481	2436900000	68	P35571	P35571	Glycerol-3-phosphate dehydrogenase, mitochondrial	Gpd2
32.1292	31.5733	32.1957	31.499	32.0236	31.7071	31.2401	31.6254				9	9	9	44.9	44.9	44.9	21.783	0	44.745	15977000000	84	P35704	P35704	Peroxiredoxin-2	Prdx2
25.7897	NaN	25.3393	NaN	NaN	NaN	24.9646	NaN				4	3	3	14.6	12.1	12.1	42.889	0.00053362	1.4128	163600000	4	P35815	P35815	Protein phosphatase 1B	Ppm1b
25.2386	NaN	25.4715	NaN	NaN	NaN	NaN	NaN				2	2	2	11.5	11.5	11.5	22.696	0	5.287	116720000	4	P36201	P36201	Cysteine-rich protein 2	Crip2
25.7423	26.049	26.3181	26.1964	25.654	NaN	25.5212	NaN				6	6	6	23	23	23	35.521	0	13.532	333920000	12	P36202	P36202	PDZ and LIM domain protein 4	Pdlim4
27.7878	28.6669	30.6863	29.7158	28.551	NaN	30.3076	27.4788				19	19	18	29.7	29.7	28	79.149	0	117.84	3443900000	49	P36370	P36370	Antigen peptide transporter 1	Tap1
27.0568	28.4239	30.0318	29.031	26.7348	NaN	28.9329	27.3754				13	12	12	21.6	19.9	19.9	77.712	0	45.689	1931400000	24	P36372	P36372	Antigen peptide transporter 2	Tap2
25.8039	NaN	25.6048	NaN	NaN	NaN	25.771	NaN				10	5	5	29.5	16.5	16.5	44.281	0	5.0652	203190000	6	P36506	P36506	Dual specificity mitogen-activated protein kinase kinase 2	Map2k2
28.4641	28.7179	28.4644	29.0246	28.8631	28.5097	28.5219	28.216				6	6	5	27.7	27.7	22.3	23.317	0	13.409	980680000	20	P36860	P36860	Ras-related protein Ral-B	Ralb
27.5385	27.952	28.1736	27.5253	27.6939	NaN	27.0522	28.2608				10	10	10	24.4	24.4	24.4	51.677	0	25.373	941200000	26	P36876;P56932;P36877;P97888	P36876;P56932	Serine/threonine-protein phosphatase 2A 55 kDa regulatory subunit B alpha isoform;Serine/threonine-protein phosphatase 2A 55 kDa regulatory subunit B delta isoform	Ppp2r2a;Ppp2r2d
28.0396	28.484	28.1739	28.1194	28.3643	NaN	28.1726	29.5665				4	4	4	16.8	16.8	16.8	22.225	0	5.8394	798960000	16	P36970;Q91XR8	P36970;Q91XR8	Phospholipid hydroperoxide glutathione peroxidase, mitochondrial;Phospholipid hydroperoxide glutathione peroxidase, nuclear	Gpx4
29.4093	29.8176	29.8601	29.5275	28.9118	NaN	28.9739	27.9934				8	8	8	54.4	54.4	54.4	19.546	0	14.986	3187500000	34	P36972	P36972	Adenine phosphoribosyltransferase	Aprt
27.6636	27.2136	27.789	27.7114	27.4249	26.3656	27.99	26.9752				15	15	15	14.3	14.3	14.3	155	0	20.32	888870000	28	P37199	P37199	Nuclear pore complex protein Nup155	Nup155
28.686	29.1754	28.3653	28.6792	29.0862	28.2767	28.3286	28.8277				15	15	10	30.4	30.4	19.8	63.744	0	40.334	1967100000	48	P37285;Q68G30	P37285	Kinesin light chain 1	Klc1
30.6572	25.0418	31.275	25.675	29.8202	NaN	28.2941	26.3166				11	11	11	45.5	45.5	45.5	36.434	0	40.676	7051200000	43	P37397	P37397	Calponin-3	Cnn3
NaN	26.327	NaN	26.5846	NaN	NaN	NaN	NaN				5	5	5	9.5	9.5	9.5	72.48	0	1.8212	119560000	5	P37727	P37727	Rab proteins geranylgeranyltransferase component A 1	Chm
27.8641	25.721	28.0141	25.7112	25.6951	NaN	26.925	NaN				6	6	6	39.6	39.6	39.6	20.456	0	42.486	708540000	16	P37996	P37996	ADP-ribosylation factor-like protein 3	Arl3
25.7371	29.212	27.3269	29.1934	29.4515	NaN	27.21	NaN				4	4	4	8.4	8.4	8.4	53.051	0.0019881	0.25608	804090000	9	P38062	P38062	Methionine aminopeptidase 2	Metap2
25.1408	27.8146	NaN	27.8897	NaN	NaN	26.4695	NaN				2	2	2	7.4	7.4	7.4	27.274	0	1.8683	252350000	6	P38483	P38483	C->U-editing enzyme APOBEC-1	Apobec1
33.5727	33.2301	33.5289	33.3433	33.1838	32.0857	33.0476	32.3236				146	146	146	37.5	37.5	37.5	532.25	0	323.31	45713000000	711	P38650	P38650	Cytoplasmic dynein 1 heavy chain 1	Dync1h1
30.4895	30.1354	30.5243	30.3232	30.3019	29.1842	30.1574	29.6189				21	21	21	52.7	52.7	52.7	61.402	0	45.237	5515500000	74	P38652	P38652	Phosphoglucomutase-1	Pgm1
29.9946	29.6126	30.4575	29.7968	29.9321	28.8611	29.8057	29.4502				14	14	14	34	34	34	47.777	0	20.547	4496100000	45	P38656	P38656	Lupus La protein homolog	Ssb
32.8897	31.4471	32.9276	31.2886	32.3559	30.1827	32.3281	31.6602				25	25	25	39	39	39	72.719	0	108.48	25792000000	181	P38659	P38659	Protein disulfide-isomerase A4	Pdia4
26.3771	NaN	26.7398	25.0319	NaN	NaN	25.374	NaN				3	3	3	27.6	27.6	27.6	14.258	0	5.467	305240000	8	P38718	P38718	Mitochondrial pyruvate carrier 2	Mpc2
32.1623	32.1355	32.3255	32.109	32.1811	30.0866	31.8967	30.3938				13	13	13	49.5	49.5	49.5	32.824	0	323.31	20118000000	105	P38983	P38983	40S ribosomal protein SA	Rpsa
28.2416	NaN	29.5156	NaN	25.2883	NaN	28.0915	NaN				2	2	2	11.4	11.4	11.4	12.268	0	18.794	1821200000	19	P39032	P39032	60S ribosomal protein L36	Rpl36
30.6343	31.5896	30.4989	31.7311	30.577	29.7943	30.7661	29.3685				27	27	19	35.9	35.9	26.6	98.229	0	79.176	5511700000	110	P39052	P39052	Dynamin-2	Dnm2
27.4799	28.156	27.2748	27.7879	27.2203	NaN	27.342	NaN				4	4	4	25.8	25.8	25.8	21.584	0	6.6786	682470000	22	P39069	P39069	Adenylate kinase isoenzyme 1	Ak1
27.9853	27.6919	27.9167	27.3809	28.2706	27.8293	27.6292	NaN				5	5	4	17.5	17.5	14.8	34.134	0	2.4111	1085600000	15	P39951;Q63699	P39951	Cyclin-dependent kinase 1	Cdk1
29.8496	28.8164	29.8425	29.1609	27.9641	27.8824	29.1866	NaN				10	10	10	48.3	48.3	48.3	22.965	0	57.693	2887300000	45	P40112	P40112	Proteasome subunit beta type-3	Psmb3
29.0632	29.053	29.0443	29.4623	28.8674	28.3156	29.2635	27.9797				7	7	7	36.3	36.3	36.3	22.912	0	10.709	2543700000	27	P40307	P40307	Proteasome subunit beta type-2	Psmb2
30.688	30.5161	31.3243	30.3151	30.1551	28.0411	30.8309	28.9496				32	32	32	49.5	49.5	49.5	75.81	0	59.848	6543900000	93	P40329	P40329	Arginine--tRNA ligase, cytoplasmic	Rars
27.8838	24.7991	28.6369	26.1472	24.4074	NaN	26.3619	NaN				10	10	10	26.3	26.3	26.3	56.614	0	6.9113	935620000	20	P40615	P40615	H/ACA ribonucleoprotein complex subunit 4	Dkc1
31.1945	29.3441	31.5678	30.5738	30.0716	28.053	30.2201	29.0134				7	7	7	34.6	34.6	34.6	24.309	0	38.028	9446500000	38	P41123	P41123	60S ribosomal protein L13	Rpl13
30.5451	NaN	30.5411	NaN	29.9999	NaN	29.3422	NaN				5	5	5	35.4	35.4	35.4	20.552	0	29.694	4680600000	23	P41350;P51638	P41350	Caveolin-1	Cav1
27.5441	28.5685	27.7674	27.9781	27.7171	27.1669	27.8014	26.8616				5	5	5	38	38	38	18.151	0	29.738	961280000	29	P41498	P41498	Low molecular weight phosphotyrosine protein phosphatase	Acp1
27.3432	NaN	27.3825	NaN	27.5461	NaN	27.5368	NaN				8	8	8	18.6	18.6	18.6	68.458	0	5.881	648990000	10	P41499	P41499	Tyrosine-protein phosphatase non-receptor type 11	Ptpn11
27.2391	26.1171	27.3487	25.8519	27.2235	NaN	26.894	NaN				6	6	6	4.3	4.3	4.3	173.22	0	7.3823	558300000	16	P41516	P41516	DNA topoisomerase 2-alpha	Top2a
30.791	30.4226	30.9073	30.3135	30.7278	29.6875	30.7742	30.3946				24	24	24	31.5	31.5	31.5	107.16	0	90.631	6269500000	119	P41542	P41542	General vesicular transport factor p115	Uso1
31.121	31.4325	30.8173	31.4189	31.3753	31.7071	31.0647	32.2815				15	14	14	42.3	40.1	40.1	46.734	0	121.89	8371300000	94	P41562	P41562	Isocitrate dehydrogenase [NADP] cytoplasmic	Idh1
27.2936	27.3967	27.3007	27.3763	NaN	NaN	27.2636	NaN				8	8	8	36.9	36.9	36.9	42.851	0	42.732	790810000	22	P41565	P41565	Isocitrate dehydrogenase [NAD] subunit gamma 1, mitochondrial	Idh3g
27.3437	NaN	28.3757	NaN	NaN	NaN	NaN	NaN				3	3	3	3.8	3.8	3.8	96.225	0	2.5824	708340000	4	P41738	P41738	Aryl hydrocarbon receptor	Ahr
NaN	NaN	NaN	NaN	NaN	NaN	24.0577	NaN				2	2	2	3.4	3.4	3.4	73.563	0.001046	1.0637	40684000	2	P41777	P41777	Nucleolar and coiled-body phosphoprotein 1	Nolc1
31.2264	30.5779	31.1158	30.861	30.8834	30.5188	30.3073	30.9546				15	13	13	41.3	35	35	36.612	0	72.939	9113600000	83	P42123	P42123	L-lactate dehydrogenase B chain	Ldhb
24.9628	NaN	25.7974	NaN	NaN	NaN	24.2094	NaN				6	6	6	2.6	2.6	2.6	288.79	0	3.66	130960000	6	P42346	P42346	Serine/threonine-protein kinase mTOR	Mtor
28.5381	28.932	28.5523	29.1737	28.9412	NaN	28.5155	NaN				4	4	4	16.2	16.2	16.2	20.599	0	19.151	1776400000	18	P42667	P42667	Signal peptidase complex catalytic subunit SEC11A	Sec11a
28.0289	29.0937	28.0701	29.0548	27.7568	27.7975	28.4196	27.8624				13	13	13	21.9	21.9	21.9	80.253	0	15.008	1323000000	31	P42676	P42676	Neurolysin, mitochondrial	Nln
31.4018	24.3578	31.7231	NaN	30.925	27.5353	27.8342	26.4049				13	13	13	69.9	69.9	69.9	22.892	0	37.18	7755300000	44	P42930	P42930	Heat shock protein beta-1	Hspb1
28.7621	29.5939	28.6429	29.3181	29.4203	27.9498	29.0931	28.4442				9	9	9	38.2	38.2	38.2	35.538	0	71.779	2159500000	40	P43138	P43138	DNA-(apurinic or apyrimidinic site) lyase;DNA-(apurinic or apyrimidinic site) lyase, mitochondrial	Apex1
29.5459	27.4512	29.6644	27.6525	29.1781	NaN	28.86	29.1579				18	18	18	27.2	27.2	27.2	94.446	0	39.259	3060200000	56	P43244	P43244	Matrin-3	Matr3
26.2919	NaN	27.0334	NaN	26.5456	NaN	26.658	NaN				8	8	8	7.5	7.5	7.5	141.39	0	9.5008	389410000	12	P43245;Q08201	P43245	Multidrug resistance protein 1	Abcb1
29.1952	29.4932	29.2756	29.3777	29.6011	NaN	29.3296	NaN				4	4	4	16.5	16.5	16.5	20.885	0	8.3394	1852500000	20	P43278	P43278	Histone H1.0;Histone H1.0, N-terminally processed	H1f0
NaN	NaN	24.4825	NaN	NaN	NaN	NaN	NaN				2	2	2	6.1	6.1	6.1	43.314	0.0010347	0.8553	67578000	2	P43424	P43424	Galactose-1-phosphate uridylyltransferase	Galt
26.017	27.6146	27.3889	27.3435	26.0976	NaN	26.4712	NaN				6	6	6	18.7	18.7	18.7	45.575	0	11.991	433930000	13	P43527	P43527	Caspase-1;Caspase-1 subunit p20;Caspase-1 subunit p10	Casp1
27.2918	27.6913	27.0144	27.3508	28.2344	NaN	27.078	NaN				4	4	4	15	15	15	34.455	0	13.248	463110000	12	P45479	P45479	Palmitoyl-protein thioesterase 1	Ppt1
34.6624	35.2604	34.6673	35.1435	34.062	33.8089	34.2965	32.844				15	15	15	69.3	69.3	69.3	18.532	0	252.79	81699000000	187	P45592	P45592	Cofilin-1	Cfl1
29.4899	28.2819	29.9178	27.9086	29.4551	NaN	29.4504	28.4724				17	17	17	31	31	31	70.748	0	27.206	2373900000	37	P45953	P45953	Very long-chain specific acyl-CoA dehydrogenase, mitochondrial	Acadvl
27.892	27.4438	28.6436	27.972	27.9299	26.7179	28.0603	27.5613				12	12	12	30	30	30	52.344	0	42.367	1314000000	28	P46413	P46413	Glutathione synthetase	Gss
33.6421	33.2429	33.4935	33.2611	33.4901	32.0274	33.4939	32.1991				46	46	46	66.3	66.3	66.3	89.348	0	323.31	46980000000	394	P46462	P46462	Transitional endoplasmic reticulum ATPase	Vcp
29.033	29.5541	28.9873	29.6879	29.6351	28.6731	29.0982	28.5303				11	11	11	41.7	41.7	41.7	33.565	0	27.898	2529300000	49	P46844	P46844	Biliverdin reductase A	Blvra
27.8576	27.7416	27.4788	27.7969	27.6851	27.3432	27.6836	NaN				10	10	9	23.5	23.5	21.9	55.735	0	4.741	1093400000	27	P47196	P47196	RAC-alpha serine/threonine-protein kinase	Akt1
25.5318	26.6566	26.0042	26.6144	26.1703	NaN	25.9263	NaN				3	2	2	5.6	4	4	55.543	0	2.0332	198430000	12	P47197	P47197	RAC-beta serine/threonine-protein kinase	Akt2
27.4449	27.5085	27.6608	28.0354	27.5649	NaN	27.5896	NaN				12	12	12	10.8	10.8	10.8	132.97	0	8.3424	736140000	19	P47245	P47245	Nardilysin	Nrd1
29.902	29.1977	30.0691	29.2375	29.331	27.3276	29.6797	NaN				14	14	14	62.5	62.5	62.5	30.578	0	74.195	3639600000	73	P47727	P47727	Carbonyl reductase [NADPH] 1	Cbr1
29.0078	25.8402	29.7742	26.1579	NaN	NaN	NaN	NaN				15	14	14	34.4	32.6	32.6	49.957	0	35.076	2075300000	25	P47819	P47819	Glial fibrillary acidic protein	Gfap
29.5865	NaN	29.4247	23.0216	26.7544	NaN	26.7689	NaN				8	8	8	26.6	26.6	26.6	41.706	0	39.822	1853400000	25	P47853	P47853	Biglycan	Bgn
25.8644	NaN	25.8058	NaN	NaN	NaN	NaN	NaN				8	5	5	13.7	10	10	85.559	0	5.4746	182630000	8	P47858	P47858	ATP-dependent 6-phosphofructokinase, muscle type	Pfkm
30.4677	28.2812	31.1099	28.7446	28.9393	27.8963	30.1528	26.7037				21	21	19	34.3	34.3	30.7	85.719	0	200.37	5382800000	84	P47860	P47860	ATP-dependent 6-phosphofructokinase, platelet type	Pfkp
31.2066	27.9223	31.854	28.0407	31.2897	28.4635	30.0532	28.9322				10	10	10	61.1	61.1	61.1	20.613	0	76.405	8892200000	56	P47875	P47875	Cysteine and glycine-rich protein 1	Csrp1
32.2268	32.4759	32.4178	32.2748	31.9045	30.7874	32.2282	29.874				20	20	18	55.1	55.1	50.9	62.277	0	255.37	18720000000	204	P47942;Q62950	P47942	Dihydropyrimidinase-related protein 2	Dpysl2
30.5398	31.511	30.6642	31.4951	31.1693	30.5218	30.9232	31.0358				9	9	9	38.2	38.2	38.2	28.326	0	70.195	8329200000	82	P48004	P48004	Proteasome subunit alpha type-7	Psma7
33.8421	33.6506	33.5816	33.6732	34.1171	33.3928	33.3914	33.7917				42	42	42	63.2	63.2	63.2	75.753	0	323.31	55624000000	338	P48037	P48037	Annexin A6	Anxa6
28.0366	26.6531	28.256	27.2677	27.4832	NaN	27.8085	NaN				11	11	11	21.7	21.7	21.7	83.3	0	23.274	1051600000	32	P48450	P48450	Lanosterol synthase	Lss
34.0086	33.5366	34.407	33.8484	32.5833	32.2538	33.8234	32.5208				14	14	14	78.3	78.3	78.3	26.849	0	200.94	53777000000	200	P48500	P48500	Triosephosphate isomerase	Tpi1
27.6199	27.2338	27.036	27.3608	27.19	NaN	27.47	NaN				4	4	4	17.9	17.9	17.9	30.548	0	6.2396	560990000	9	P48508	P48508	Glutamate--cysteine ligase regulatory subunit	Gclm
27.9187	NaN	28.0984	NaN	28.4859	NaN	27.4004	NaN				14	9	9	29.4	22	22	53.456	0	7.4556	907350000	18	P48675	P48675	Desmin	Des
33.0533	32.3724	33.0793	31.7781	33.7637	32.936	32.9369	33.6038				37	37	35	54.4	54.4	53.1	74.323	0	168.25	33084000000	231	P48679	P48679	Prelamin-A/C;Lamin-A/C	Lmna
31.7764	32.3091	31.8283	32.2109	31.7697	31.3126	32.2094	32.7983				22	22	22	41.2	41.2	41.2	73.857	0	129.46	11692000000	166	P48721	P48721	Stress-70 protein, mitochondrial	Hspa9
28.5971	NaN	29.1403	24.9771	28.1367	NaN	27.6567	NaN				15	15	15	34.2	34.2	34.2	64.246	0	19.664	1516600000	28	P49088	P49088	Asparagine synthetase [glutamine-hydrolyzing]	Asns
31.7575	29.6596	31.3162	30.0178	31.6334	29.4552	30.4309	30.5104				18	18	18	30	30	30	88.494	0	154.33	9430800000	90	P49134	P49134	Integrin beta-1	Itgb1
26.4847	NaN	26.0724	26.3348	NaN	NaN	26.1246	NaN				7	6	6	17.3	15.4	15.4	48.016	0	5.1306	320800000	6	P49186;P49187;P49185;Q63538	P49186;P49187	Mitogen-activated protein kinase 9;Mitogen-activated protein kinase 10	Mapk9;Mapk10
32.5029	31.2578	32.9451	31.4359	31.5005	28.7277	32.1465	32.3289				12	12	12	43.9	43.9	43.9	29.945	0	92.984	21324000000	95	P49242	P49242	40S ribosomal protein S3a;40S ribosomal protein S3b	Rps3a
NaN	27.2177	NaN	27.3483	NaN	NaN	25.8739	NaN				6	6	6	14.3	14.3	14.3	59.974	0	12.3	127950000	10	P49430	P49430	Thromboxane-A synthase	Tbxas1
29.165	28.5286	28.9376	28.4771	28.8699	28.7485	28.7569	27.653				9	9	9	32.6	32.6	32.6	38.982	0	34.634	1972900000	48	P49432	P49432	Pyruvate dehydrogenase E1 component subunit beta, mitochondrial	Pdhb
NaN	NaN	NaN	NaN	NaN	NaN	24.8662	NaN				3	2	2	3.8	2.8	2.8	108.21	0.004787	-0.28791	50291000	1	P49744	P49744	Thrombospondin-4	Thbs4
26.2419	26.3787	26.3302	26.0954	25.6933	NaN	25.9246	NaN				10	10	10	7.1	7.1	7.1	197.28	0	8.8435	350540000	18	P49793	P49793	Nuclear pore complex protein Nup98-Nup96;Nuclear pore complex protein Nup98;Nuclear pore complex protein Nup96	Nup98
30.4485	30.4621	30.0893	30.5785	30.4963	30.488	30.1309	30.065				7	7	7	24.7	24.7	24.7	28.564	0	160.34	5289600000	55	P49911	P49911	Acidic leucine-rich nuclear phosphoprotein 32 family member A	Anp32a
29.7144	NaN	29.7112	NaN	28.313	NaN	28.923	29.1802				18	18	18	24.1	24.1	24.1	107.99	0	34.286	3280400000	40	P50123	P50123	Glutamyl aminopeptidase	Enpep
33.4142	33.8337	33.2118	33.9719	34.1342	34.0261	33.6906	34.3819				27	27	27	54.7	54.7	54.7	67.643	0	180.09	43924000000	219	P50137	P50137	Transketolase	Tkt
NaN	NaN	NaN	27.2825	NaN	NaN	25.205	NaN				4	4	4	7.3	7.3	7.3	78.61	0	7.5989	109570000	6	P50282	P50282	Matrix metalloproteinase-9	Mmp9
25.2167	25.03	25.2583	25.2556	NaN	NaN	25.298	NaN				4	4	4	14.5	14.5	14.5	33.756	0.001992	0.26908	162650000	8	P50298;P50297	P50298;P50297	Arylamine N-acetyltransferase 2;Arylamine N-acetyltransferase 1	Nat2;Nat1
28.266	29.1009	29.0914	29.4123	27.6424	28.0404	28.4596	28.3889				14	14	14	23.1	23.1	23.1	85.706	0	33.3	1655400000	45	P50393	P50393	Cytosolic phospholipase A2;Phospholipase A2;Lysophospholipase	Pla2g4a
30.9416	27.9324	30.8927	28.6027	29.1553	26.0377	30.158	28.0775				23	16	16	59.1	43.8	43.8	50.536	0	108.33	6048600000	61	P50398	P50398	Rab GDP dissociation inhibitor alpha	Gdi1
33.0492	32.5785	33.1642	33.0975	32.3039	31.5585	32.747	30.9997				35	35	28	74.2	74.2	58.9	50.537	0	323.31	32433000000	285	P50399	P50399	Rab GDP dissociation inhibitor beta	Gdi2
26.7556	28.0501	26.5669	27.5305	27.1376	NaN	26.9855	NaN				3	3	3	26.9	26.9	26.9	13.37	0	2.6986	492040000	16	P50408	P50408	V-type proton ATPase subunit F	Atp6v1f
28.593	29.3037	27.5568	28.6318	30.1777	27.5733	29.2446	26.6017				6	6	6	11.9	11.9	11.9	58.958	0	17.656	1419500000	28	P50430	P50430	Arylsulfatase B	Arsb
26.2342	27.0455	NaN	26.6227	NaN	NaN	NaN	NaN				5	5	5	15.1	15.1	15.1	48.242	0.0019851	0.23687	127980000	7	P50442	P50442	Glycine amidinotransferase, mitochondrial	Gatm
30.9311	30.0215	31.9273	30.8383	30.8077	27.58	30.9762	30.5684				28	28	28	44	44	44	106.79	0	129.85	15318000000	79	P50475	P50475	Alanine--tRNA ligase, cytoplasmic	Aars
30.1618	30.7596	29.9548	30.682	30.3966	29.561	30.0897	28.828				8	8	8	24.2	24.2	24.2	41.279	0	13.232	4708600000	55	P50503	P50503	Hsc70-interacting protein	St13
25.1204	27.7539	25.3962	29.2983	25.0619	NaN	26.8979	26.5693				8	7	7	19.5	17.9	17.9	59.153	0	9.5935	439570000	12	P50545	P50545	Tyrosine-protein kinase HCK	Hck
31.7055	30.6298	32.5906	30.8227	31.0264	27.9218	30.6896	29.0983				14	14	14	34.4	34.4	34.4	47.256	0	51.692	15882000000	97	P50878	P50878	60S ribosomal protein L4	Rpl4
27.1042	27.7407	27.1939	28.8653	26.7443	26.4922	26.5737	25.8228				11	11	11	12.6	12.6	12.6	115.44	0	10.898	686580000	24	P50904	P50904	Ras GTPase-activating protein 1	Rasa1
NaN	NaN	24.7777	NaN	NaN	NaN	25.7061	NaN				2	2	2	7.7	7.7	7.7	35.255	0.0010288	0.76765	108690000	2	P51145	P51145	Fos-related antigen 2	Fosl2
26.4944	27.2424	26.8125	27.3984	26.4226	NaN	26.4417	NaN				8	8	6	40.4	40.4	33.8	23.629	0	11.112	448930000	19	P51146	P51146	Ras-related protein Rab-4B	Rab4b
29.2941	30.0753	29.0767	30.1082	30.2701	29.1638	30.2826	29.5394				7	7	7	29.9	29.9	29.9	43.501	0	38.321	3275800000	41	P51577	P51577	P2X purinoceptor 4	P2rx4
29.8612	29.2425	29.3537	29.6255	29.1901	28.2495	29.2816	28.4702				14	14	14	43.1	43.1	43.1	47.096	0	47.752	2929800000	58	P51583	P51583	Multifunctional protein ADE2;Phosphoribosylaminoimidazole-succinocarboxamide synthase;Phosphoribosylaminoimidazole carboxylase	Paics
28.4494	29.3245	28.2857	29.4091	28.8159	NaN	28.4753	28.9899				12	12	12	30.2	30.2	30.2	49.604	0	33.898	1143900000	34	P51607	P51607	N-acylglucosamine 2-epimerase	Renbp
32.038	32.82	32.0207	32.702	32.5342	32.0407	32.5154	32.1418				19	19	19	64.6	64.6	64.6	36.505	0	170.17	18805000000	190	P51635	P51635	Alcohol dehydrogenase [NADP(+)]	Akr1a1
24.794	NaN	NaN	NaN	NaN	NaN	NaN	NaN				2	2	2	4.2	4.2	4.2	88.73	0.0057088	-0.39959	61578000	3	P51799	P51799	H(+)/Cl(-) exchange transporter 7	Clcn7
NaN	NaN	NaN	NaN	NaN	NaN	NaN	25.1637				3	1	1	8.9	3.3	3.3	38.279	0.0010163	0.58822	742870000	3	P51886	P51886	Lumican	Lum
26.1879	26.1961	26.8053	26.198	NaN	NaN	26.0526	NaN				6	6	6	12.9	12.9	12.9	64.023	0	5.7181	310740000	7	P52020	P52020	Squalene monooxygenase	Sqle
NaN	NaN	NaN	NaN	26.7208	NaN	NaN	NaN				2	1	1	6.2	3.2	3.2	37.18	0.0097403	-0.78062	11848000	1	P52287	P52287	Guanine nucleotide-binding protein G(I)/G(S)/G(T) subunit beta-3	Gnb3
31.8826	31.2258	32.0638	31.7198	31.4905	30.5451	31.3262	30.2165				26	26	26	38.3	38.3	38.3	97.123	0	169.07	15184000000	139	P52296	P52296	Importin subunit beta-1	Kpnb1
29.9783	29.7496	29.5327	29.8093	30.2233	29.7671	29.9103	30.5315				29	15	15	39.6	24.4	24.4	104.59	0	133.33	4059300000	47	P52303	P52303	AP-1 complex subunit beta-1	Ap1b1
29.3106	30.7348	29.7457	30.4359	30.043	29.6786	29.6034	30.3878				10	10	10	42.7	42.7	42.7	28.574	0	22.864	4175900000	70	P52555	P52555	Endoplasmic reticulum resident protein 29	Erp29
26.3632	NaN	26.4674	26.3338	NaN	NaN	26.2825	NaN				5	5	5	6.7	6.7	6.7	107.21	0	2.247	300010000	6	P52590	P52590	Nuclear pore complex protein Nup107	Nup107
29.4915	27.6708	29.8666	29.0027	28.1264	NaN	28.989	NaN				25	25	25	49	49	49	88.039	0	181.02	3217800000	68	P52631	P52631	Signal transducer and activator of transcription 3	Stat3
26.6998	26.8404	26.52	27.1314	NaN	NaN	26.3847	NaN				5	5	5	6.1	6.1	6.1	90.222	0	1.9451	346250000	8	P52632;Q62771	P52632;Q62771	Signal transducer and activator of transcription 5B;Signal transducer and activator of transcription 5A	Stat5b;Stat5a
28.718	29.218	28.5118	29.0457	28.7123	29.0091	28.9283	29.7024				18	18	18	19.1	19.1	19.1	129.78	0	60.035	1679400000	44	P52873	P52873	Pyruvate carboxylase, mitochondrial	Pc
29.4059	30.1447	29.3971	29.7607	30.1846	NaN	29.5892	NaN				4	3	3	23.8	18.1	18.1	24.159	0	9.3965	3124400000	24	P52925	P52925	High mobility group protein B2	Hmgb2
30.4411	NaN	30.8021	NaN	29.6898	NaN	28.9212	NaN				15	15	15	75.2	75.2	75.2	35.584	0	151.61	5368800000	55	P52944	P52944	PDZ and LIM domain protein 1	Pdlim1
26.1415	NaN	26.3276	NaN	NaN	NaN	NaN	NaN				4	4	4	11.2	11.2	11.2	56.916	0	17.006	285410000	9	P53042	P53042	Serine/threonine-protein phosphatase 5	Ppp5c
30.5405	29.7161	30.52	29.8847	29.4006	28.463	29.8212	NaN				25	21	19	35.2	30.9	27.9	96.173	0	120.96	5312000000	83	P53534	P53534	Glycogen phosphorylase, brain form	Pygb
NaN	26.5166	NaN	27.0268	NaN	NaN	NaN	NaN				2	2	2	8.2	8.2	8.2	26.158	0.0019891	0.25792	105050000	3	P53563	P53563	Bcl-2-like protein 1	Bcl2l1
NaN	NaN	25.2665	25.4838	NaN	NaN	NaN	NaN				3	3	3	7.2	7.2	7.2	42.414	0	2.5462	112160000	5	P53610	P53610	Geranylgeranyl transferase type-1 subunit beta	Pggt1b
27.5082	28.0243	27.974	27.9691	27.1435	NaN	27.5692	NaN				11	11	9	37.3	37.3	32.5	46.981	0	15.571	888640000	25	P53676	P53676	AP-3 complex subunit mu-1	Ap3m1
NaN	NaN	25.2557	NaN	NaN	NaN	NaN	NaN				5	3	3	14.1	9.3	9.3	46.874	0.00054201	1.6244	110100000	1	P53678	P53678	AP-3 complex subunit mu-2	Ap3m2
27.4394	27.6834	26.9636	27.4572	28.1086	NaN	27.4979	NaN				9	8	8	39.1	35.8	35.8	31.45	0	8.5667	583290000	17	P53812	P53812	Phosphatidylinositol transfer protein beta isoform	Pitpnb
NaN	NaN	22.4191	NaN	NaN	NaN	NaN	NaN				3	2	2	3.6	2.4	2.4	74.626	0.003848	-0.21795	12579000	2	P53813	P53813	Vitamin K-dependent protein S	Pros1
26.9825	27.8165	27.2252	28.841	27.7035	NaN	28.8062	28.5728				3	3	3	5.9	5.9	5.9	53.238	0	7.6832	666250000	12	P53987	P53987	Monocarboxylate transporter 1	Slc16a1
31.6741	29.1726	31.32	29.7325	31.1344	27.793	30.842	29.877				15	15	15	33.1	33.1	33.1	60.897	0	82.481	10250000000	84	P54001	P54001	Prolyl 4-hydroxylase subunit alpha-1	P4ha1
28.3496	30.6522	27.9618	30.9446	29.4795	29.9417	29.0825	30.5657				14	14	14	16.8	16.8	16.8	97.953	0	14.715	1751600000	41	P54100	P54100	Proto-oncogene vav	Vav1
29.8312	28.8278	29.8559	29.0574	29.3025	28.8452	28.6593	28.4905				13	8	8	57.9	38.8	38.8	37.377	0	128.91	3282300000	35	P54311	P54311	Guanine nucleotide-binding protein G(I)/G(S)/G(T) subunit beta-1	Gnb1
31.3712	31.5942	31.5247	31.6404	31.2898	29.2118	30.958	31.3476				13	13	5	51.2	51.2	24.1	37.331	0	231.46	10095000000	90	P54313	P54313	Guanine nucleotide-binding protein G(I)/G(S)/G(T) subunit beta-2	Gnb2
28.3931	28.8594	28.4439	28.6017	28.7232	27.297	28.326	29.0493				18	18	18	28.6	28.6	28.6	87.083	0	66.217	1648900000	49	P54319	P54319	Phospholipase A-2-activating protein	Plaa
NaN	26.9599	26.3627	26.4466	26.6078	NaN	26.1512	NaN				7	7	7	17.2	17.2	17.2	63.973	0	12.409	322640000	10	P54645;Q09137	P54645	5-AMP-activated protein kinase catalytic subunit alpha-1	Prkaa1
26.4138	27.1804	27.6095	29.4557	25.9616	NaN	27.6497	NaN				6	6	6	23.1	23.1	23.1	46.045	0	28.698	857800000	21	P54690	P54690	Branched-chain-amino-acid aminotransferase, cytosolic	Bcat1
NaN	NaN	NaN	NaN	NaN	NaN	27.0999	NaN				2	2	1	1.7	1.7	0.9	111.01	0.0089202	-0.64161	127860000	4	P54757;P29321;P09759;O08680;P54758	P54757;P29321;P09759;O08680;P54758	Ephrin type-A receptor 5;Ephrin type-A receptor 8;Ephrin type-B receptor 1;Ephrin type-A receptor 3;Ephrin type-A receptor 6	Epha5;Epha8;Ephb1;Epha3;Epha6
NaN	NaN	NaN	NaN	NaN	NaN	NaN	NaN				2	1	1	1.8	1	1	111.95	0.0097493	-0.76652	0	1	P54759	P54759	Ephrin type-A receptor 7	Epha7
29.0111	29.5739	29.0846	29.6106	29.728	28.7018	29.1436	NaN				13	13	13	59	59	59	33.192	0	62.272	2627200000	56	P54921;P85969	P54921	Alpha-soluble NSF attachment protein	Napa
28.5785	32.3006	29.0938	32.1236	30.0786	32.0739	30.4715	31.8131				4	4	4	32	32	32	16.827	0	58.168	4582500000	42	P55009	P55009	Allograft inflammatory factor 1	Aif1
26.5086	NaN	26.7323	NaN	NaN	NaN	NaN	NaN				3	3	3	29.5	29.5	29.5	14.864	0	4.1408	282740000	3	P55051	P55051	Fatty acid-binding protein, brain	Fabp7
30.2048	31.9985	30.08	31.2307	30.933	30.7769	30.0956	31.3706				7	7	7	54.1	54.1	54.1	15.059	0	65.096	6226700000	60	P55053	P55053	Fatty acid-binding protein, epidermal	Fabp5
28.3282	NaN	28.7434	NaN	27.5654	NaN	27.6418	NaN				16	16	16	18.4	18.4	18.4	128.86	0	55.337	1339200000	28	P55161	P55161	Nck-associated protein 1	Nckap1
26.6881	25.1133	26.6711	25.215	NaN	NaN	25.6676	NaN				5	5	5	21.3	21.3	21.3	31.491	0	13.329	316320000	15	P55213	P55213	Caspase-3;Caspase-3 subunit p17;Caspase-3 subunit p12	Casp3
30.8182	32.4118	30.4778	32.2537	31.8396	31.5276	31.4801	32.1337				18	18	18	55.8	55.8	55.8	35.848	0	68.15	11156000000	113	P55260	P55260	Annexin A4	Anxa4
NaN	NaN	24.0263	NaN	NaN	NaN	NaN	NaN				2	2	2	2.6	2.6	2.6	129.91	0	8.8417	37378000	1	P55266	P55266	Double-stranded RNA-specific adenosine deaminase	Adar
27.0827	27.5843	27.3304	27.138	NaN	NaN	27.0336	NaN				3	3	3	25	25	25	14.173	0	22.507	592570000	8	P55770	P55770	NHP2-like protein 1;NHP2-like protein 1, N-terminally processed	Nhp2l1
26.3445	26.4167	26.201	26.2409	26.4231	NaN	26.2121	NaN				7	7	7	8.7	8.7	8.7	115.6	0	6.0348	366020000	10	P56558	P56558	UDP-N-acetylglucosamine--peptide N-acetylglucosaminyltransferase 110 kDa subunit	Ogt
27.4309	27.1888	27.5284	27.1679	27.2557	NaN	26.9215	27.7292				3	3	3	16.2	16.2	16.2	28.172	0	20.169	371100000	9	P56571	P56571	ES1 protein homolog, mitochondrial
31.4294	31.058	31.6687	31.2067	31.0641	29.8056	31.2079	31.3372				19	19	18	45.1	45.1	43.1	50.967	0	111.06	11783000000	101	P56574	P56574	Isocitrate dehydrogenase [NADP], mitochondrial	Idh2
27.1908	27.7836	27.1298	27.5338	28.0039	NaN	27.8403	NaN				5	5	5	22.2	22.2	22.2	37.998	0	15.505	728810000	21	P56603	P56603	Secretory carrier-associated membrane protein 1	Scamp1
NaN	NaN	25.2789	NaN	NaN	NaN	24.9619	NaN				2	2	2	11.1	11.1	11.1	23.961	0.0010293	0.76777	120400000	2	P57113	P57113	Maleylacetoacetate isomerase	Gstz1
24.8504	NaN	NaN	NaN	NaN	NaN	27.2351	NaN				3	3	3	11	11	11	36.71	0	11.995	219920000	4	P58195	P58195	Phospholipid scramblase 1	Plscr1
27.2987	28.0881	27.2024	27.6426	28.2303	NaN	27.7178	28.0398				6	6	6	33.2	33.2	33.2	26.703	0	17.576	650880000	16	P58200	P58200	Vesicle transport through interaction with t-SNAREs homolog 1B	Vti1b
26.0801	NaN	25.9364	NaN	NaN	NaN	25.8254	NaN				4	4	4	6.5	6.5	6.5	87.11	0	7.9819	237040000	4	P58405	P58405	Striatin-3	Strn3
NaN	NaN	NaN	NaN	NaN	NaN	NaN	25.0783				15	1	1	34.9	3.2	3.2	32.836	0.0010194	0.62366	72424000	2	P58775	P58775	Tropomyosin beta chain	Tpm2
NaN	NaN	24.1178	NaN	NaN	NaN	NaN	NaN				3	2	2	10.9	8.3	8.3	35.835	0	1.8423	38402000	2	P59895	P59895	Serine/threonine-protein kinase Nek6	Nek6
24.6835	24.8602	24.8762	24.8255	24.7847	NaN	24.543	NaN				2	2	2	5.5	5.5	5.5	40.243	0.0033997	-0.060937	105880000	3	P59924	P59924	THO complex subunit 1	Thoc1
28.961	27.9911	29.0669	27.9267	28.1523	26.5966	28.6307	27.5825				15	15	15	47.4	47.4	47.4	50.213	0	101.14	1792600000	59	P60123	P60123	RuvB-like 1	Ruvbl1
39.416	39.7191	39.1423	39.9681	39.5196	39.4527	39.1026	38.9749				29	29	2	78.4	78.4	4.8	41.736	0	323.31	2143400000000	2089	P60711	P60711	Actin, cytoplasmic 1;Actin, cytoplasmic 1, N-terminally processed	Actb
30.9959	30.602	31.244	30.7799	30.8281	28.7329	30.6203	30.4153				4	4	4	23.5	23.5	23.5	13.373	0	27.262	8521700000	42	P60868	P60868	40S ribosomal protein S20	Rps20
28.3339	28.2273	28.4466	28.1053	28.3112	27.8193	28.127	NaN				8	8	3	33	33	12.9	34.834	0	19.624	1521800000	22	P60892	P60892	Ribose-phosphate pyrophosphokinase 1	Prps1
30.2065	30.4267	30.5687	30.2779	29.4597	NaN	29.9242	29.7057				11	11	11	55.3	55.3	55.3	27.399	0	29.553	4940200000	54	P60901	P60901	Proteasome subunit alpha type-6	Psma6
28.5072	29.1036	27.8553	28.2082	29.5148	NaN	28.6583	NaN				5	5	5	45.5	45.5	45.5	22.101	0	33.081	2126100000	21	P60905	P60905	DnaJ homolog subfamily C member 5	Dnajc5
26.0841	26.8969	25.7892	26.554	26.525	NaN	25.9081	NaN				3	3	3	20.5	20.5	20.5	22.432	0	8.6664	291570000	8	P61023	P61023	Calcineurin B homologous protein 1	Chp1
30.8687	31.5899	31.3506	31.6446	30.9252	30.64	31.1815	31.3188				14	14	14	76.7	76.7	76.7	23.927	0	56.734	7294000000	84	P61107	P61107	Ras-related protein Rab-14	Rab14
28.7494	28.4597	28.8576	28.7154	28.5926	NaN	28.4559	NaN				11	11	11	30	30	30	51.596	0	17.14	1898500000	30	P61203	P61203	COP9 signalosome complex subunit 2	Cops2
30.4802	30.7553	30.5621	31.0274	30.6825	30.3738	30.892	30.1437				10	5	5	60.2	31.5	31.5	20.697	0	18.653	7416300000	46	P84079;P61206;P84082	P84079;P61206;P84082	ADP-ribosylation factor 1;ADP-ribosylation factor 3;ADP-ribosylation factor 2	Arf1;Arf3;Arf2
28.1116	27.1553	28.0041	27.783	26.2885	NaN	27.7518	NaN				5	5	5	42.5	42.5	42.5	20.411	0	9.3951	910040000	23	P61212	P61212	ADP-ribosylation factor-like protein 1	Arl1
26.6929	26.9981	26.4923	27.3223	26.6503	25.8771	27.2769	NaN				4	4	4	26.8	26.8	26.8	20.504	0	10.768	467840000	22	P61227	P61227	Ras-related protein Rap-2b	Rap2b
30.8524	29.958	31.0917	30.7326	30.7007	NaN	29.9564	NaN				7	7	7	31.9	31.9	31.9	24.146	0	13.507	7600600000	31	P61314	P61314	60S ribosomal protein L15	Rpl15
31.1934	30.0308	31.5315	30.4114	29.9466	NaN	30.1027	NaN				6	6	6	44.9	44.9	44.9	15.798	0	31.026	9612700000	46	P61354	P61354	60S ribosomal protein L27	Rpl27
28.3279	NaN	29.0856	NaN	NaN	NaN	27.1109	NaN				2	2	2	32.6	32.6	32.6	10.275	0	11.345	1319000000	11	P61515;D4AAZ6	P61515;D4AAZ6	Putative 60S ribosomal protein L37a;60S ribosomal protein L37a	Rpl37a-ps1;Rpl37a
31.2855	31.2894	31.3653	31.9449	31.2804	30.2115	31.0601	30.4754				7	7	6	40.4	40.4	31.6	21.782	0	25.582	11150000000	76	P61589	P61589	Transforming protein RhoA	Rhoa
30.5716	30.5447	30.6521	30.9131	31.1071	30.3603	30.5788	31.2418				8	8	8	17.9	17.9	17.9	52.264	0	38.09	6955800000	38	P61621	P61621	Protein transport protein Sec61 subunit alpha isoform 1	Sec61a1
30.6312	29.3734	30.787	30.1069	30.1804	28.7719	30.4552	29.213				7	2	2	50.6	13.9	13.9	20.396	0	5.843	5069300000	19	P61751	P61751	ADP-ribosylation factor 4	Arf4
27.5036	28.2519	27.9463	28.8432	27.4199	NaN	27.3812	NaN				9	9	9	19	19	19	67.568	0	18.703	996580000	19	P61765	P61765	Syntaxin-binding protein 1	Stxbp1
29.5768	28.981	29.2356	29.3907	29.9407	NaN	29.4635	30.2709				4	4	4	35.4	35.4	35.4	12.497	0	35.789	2959100000	28	P61805	P61805	Dolichyl-diphosphooligosaccharide--protein glycosyltransferase subunit DAD1	Dad1
NaN	28.782	NaN	28.9991	28.7514	29.5333	NaN	30.109				2	2	2	23.2	23.2	23.2	10.871	0	4.5199	1065900000	12	P61959;Q5XIF4	P61959;Q5XIF4	Small ubiquitin-related modifier 2;Small ubiquitin-related modifier 3	Sumo2;Sumo3
26.3837	26.2764	27.2197	26.53	NaN	NaN	NaN	NaN				4	4	4	51.2	51.2	51.2	14.478	0	8.9313	422650000	8	P61972	P61972	Nuclear transport factor 2	Nutf2
31.7561	31.5908	32.1542	30.9213	32.1118	31.3039	31.6607	31.5707				17	17	17	47.1	47.1	47.1	50.976	0	139.62	17280000000	126	P61980	P61980	Heterogeneous nuclear ribonucleoprotein K	Hnrnpk
31.4835	31.5187	31.6386	31.8505	31.8765	31.685	31.6866	32.4695				12	6	6	54.3	33.2	33.2	28.302	0	23.278	10349000000	51	P61983	P61983	14-3-3 protein gamma;14-3-3 protein gamma, N-terminally processed	Ywhag
30.1315	29.1341	30.9107	29.1086	29.7098	27.9331	29.8709	NaN				8	8	8	55.2	55.2	55.2	22.127	0	78.68	5713000000	30	P62083	P62083	40S ribosomal protein S7	Rps7
30.8155	30.4136	30.9697	30.258	29.9004	28.6591	30.3799	28.4182				15	15	4	50.6	50.6	12.7	37.512	0	84.753	7260200000	91	P62138	P62138	Serine/threonine-protein phosphatase PP1-alpha catalytic subunit	Ppp1ca
28.3911	NaN	27.9315	27.4151	27.5285	NaN	27.815	NaN				14	4	4	55.4	21.4	21.4	37.186	0	27.491	1056100000	10	P62142	P62142	Serine/threonine-protein phosphatase PP1-beta catalytic subunit	Ppp1cb
32.7834	33.0667	32.8834	32.7935	32.5987	32.4225	32.7466	33.5428				12	12	12	63.1	63.1	63.1	16.837	0	223.32	31579000000	181	P62161;Q5U206	P62161	Calmodulin	Calm1
NaN	NaN	24.1874	NaN	NaN	NaN	NaN	NaN				2	2	2	13.7	13.7	13.7	21.878	0.0010363	0.88648	67107000	1	P62168	P62168	Neuronal calcium sensor 1	Ncs1
30.4038	30.1221	30.3838	29.7314	29.635	28.53	29.9811	29.1165				18	18	18	47.7	47.7	47.7	49.184	0	86.991	4617000000	78	P62193	P62193	26S protease regulatory subunit 4	Psmc1
30.7409	30.4649	30.6004	30.3596	30.7889	30.104	30.429	29.6476				19	19	19	60.1	60.1	60.1	45.626	0	170.8	5735200000	77	P62198	P62198	26S protease regulatory subunit 8	Psmc5
32.1113	31.0469	32.1453	31.3051	30.7534	27.9819	31.279	27.6567				10	10	10	51.9	51.9	51.9	24.205	0	155.06	14904000000	92	P62243	P62243	40S ribosomal protein S8	Rps8
31.0916	30.1624	31.581	30.8857	30.2042	NaN	30.6574	NaN				7	7	7	53.8	53.8	53.8	14.839	0	11.757	9538100000	50	P62246	P62246	40S ribosomal protein S15a	Rps15a
31.1034	31.0152	31.4591	31.0577	31.0506	28.8304	30.7991	29.3117				9	9	9	53.4	53.4	53.4	16.445	0	19.025	10888000000	61	P62250	P62250	40S ribosomal protein S16	Rps16
33.9273	33.7577	33.8182	33.7994	33.8062	33.4655	33.7067	33.3481				23	23	21	75.7	75.7	68.6	29.174	0	220.84	63527000000	241	P62260	P62260	14-3-3 protein epsilon	Ywhae
29.3015	28.4395	29.5298	28.3444	27.8699	NaN	28.5197	NaN				2	2	2	15.4	15.4	15.4	15.807	0	4.6868	2245100000	21	P62268	P62268	40S ribosomal protein S23	Rps23
31.9126	31.791	32.0731	32.2094	31.7413	30.4247	31.7935	30.9895				10	10	10	53.3	53.3	53.3	17.718	0	27.6	16188000000	75	P62271	P62271	40S ribosomal protein S18	Rps18
30.286	27.8425	30.6697	28.4472	27.5627	NaN	29.2399	NaN				7	7	7	38.4	38.4	38.4	17.222	0	20.533	4618400000	28	P62278	P62278	40S ribosomal protein S13	Rps13
31.138	29.9717	31.8262	30.6276	30.7806	29.0639	30.8391	28.6733				12	12	12	58.2	58.2	58.2	18.431	0	39.776	10489000000	65	P62282	P62282	40S ribosomal protein S11	Rps11
28.2103	28.4823	27.9547	28.9617	27.8471	27.2719	27.9851	NaN				6	6	6	60	60	60	20.082	0	15.56	1292600000	25	P62332	P62332	ADP-ribosylation factor 6	Arf6
31.7699	30.7474	32.1547	31.0212	30.9655	28.7659	30.8507	29.1499				12	12	12	42.1	42.1	42.1	29.995	0	38.028	13405000000	88	P62425	P62425	60S ribosomal protein L7a	Rpl7a
25.7649	26.5715	NaN	26.7178	NaN	NaN	26.0861	NaN				2	2	2	4.9	4.9	4.9	41.021	0.0010215	0.65811	167230000	5	P62483	P62483	Voltage-gated potassium channel subunit beta-2	Kcnab2
25.0408	25.4323	25.1946	25.4901	NaN	NaN	24.8842	NaN				2	2	2	14.5	14.5	14.5	19.294	0	3.74	140310000	4	P62489	P62489	DNA-directed RNA polymerase II subunit RPB7	Polr2g
NaN	NaN	25.2857	NaN	NaN	NaN	NaN	NaN				2	2	2	14	14	14	15.582	0	1.7358	85040000	2	P62501	P62501	TSC22 domain family protein 1	Tsc22d1
NaN	NaN	26.4544	NaN	NaN	NaN	NaN	NaN				4	4	4	43.8	43.8	43.8	10.99	0	5.4166	276100000	5	P62628	P62628	Dynein light chain roadblock-type 1	Dynlrb1
36.0443	34.6895	36.4372	35.1453	34.6354	33.5426	35.2151	33.7831				24	24	24	64.3	64.3	64.3	50.113	0	323.31	205530000000	309	P62630;P62632	P62630	Elongation factor 1-alpha 1	Eef1a1
27.3528	27.6067	28.2447	26.4685	27.7664	NaN	27.7246	28.0676				4	4	4	30.5	30.5	30.5	19.463	0	47.516	983660000	14	P62634	P62634	Cellular nucleic acid-binding protein	Cnbp
32.6975	31.4975	32.5866	32.3805	31.4603	28.5566	32.6455	29.3271				15	15	15	50.2	50.2	50.2	29.597	0	69.134	22242000000	131	P62703	P62703	40S ribosomal protein S4, X isoform	Rps4x
NaN	NaN	NaN	NaN	NaN	NaN	24.294	NaN				11	1	1	49.2	4.2	4.2	35.575	0	2.8136	64113000	1	P62716	P62716	Serine/threonine-protein phosphatase 2A catalytic subunit beta isoform	Ppp2cb
30.7072	30.3282	31.0029	30.7814	29.9181	NaN	30.0135	27.8092				7	7	7	39.8	39.8	39.8	20.732	0	13.754	6323800000	56	P62718	P62718	60S ribosomal protein L18a	Rpl18a
36.788	32.4767	36.5403	32.145	35.1811	31.6829	34.5557	29.2793				28	14	2	79.8	53.1	8	42.009	0	323.31	231170000000	306	P62738;P63269	P62738;P63269	Actin, aortic smooth muscle;Actin, gamma-enteric smooth muscle	Acta2;Actg2
28.77	28.6644	28.8337	28.9046	28.8282	NaN	28.968	NaN				3	3	3	20.4	20.4	20.4	17.018	0.001994	0.27592	1939300000	13	P62744	P62744	AP-2 complex subunit sigma	Ap2s1
24.8841	NaN	NaN	NaN	NaN	NaN	NaN	NaN				3	2	2	20.4	11.7	11.7	22.123	0.0010471	1.0813	72114000	2	P62747	P62747	Rho-related GTP-binding protein RhoB	Rhob
26.3652	27.1814	26.4683	27.026	25.9292	NaN	26.9526	NaN				7	7	4	43	43	23.8	22.338	0	14.661	425430000	18	P62749	P62749	Hippocalcin-like protein 1	Hpcal1
30.7958	30.9206	31.1749	30.7847	30.5271	NaN	30.4723	30.7764				6	6	6	32.7	32.7	32.7	17.695	0	7.2845	7564100000	41	P62752	P62752	60S ribosomal protein L23a	Rpl23a
30.9995	30.1137	31.4402	30.8092	29.7929	28.5144	30.2844	28.9562				6	6	6	19.7	19.7	19.7	28.68	0	13.977	7990700000	45	P62755	P62755	40S ribosomal protein S6	Rps6
28.1701	29.5318	28.1695	29.1079	28.5604	NaN	28.3956	NaN				2	2	2	25.4	25.4	25.4	12.861	0	4.8697	1420500000	18	P62775	P62775	Myotrophin	Mtpn
36.1128	36.0525	36.0055	36.1261	35.2172	33.1198	35.9499	33.3302				10	10	10	56.3	56.3	56.3	11.367	0	49.415	209610000000	305	P62804	P62804	Histone H4;Osteogenic growth peptide	Hist1h4b
31.831	32.771	31.4308	32.2385	32.1806	32.0969	31.9846	32.2923				19	19	19	44.6	44.6	44.6	56.55	0	127.33	12708000000	147	P62815	P62815	V-type proton ATPase subunit B, brain isoform	Atp6v1b2
31.9394	32.6305	31.8728	32.739	32.6317	31.6935	31.9291	31.9457				8	8	8	36.6	36.6	36.6	24.423	0	17.92	16455000000	84	P62828;Q8K586	P62828;Q8K586	GTP-binding nuclear protein Ran;GTP-binding nuclear protein Ran, testis-specific isoform	Ran;Rasl2-9
30.9714	28.5417	31.3828	28.6566	27.7303	NaN	29.2636	28.9226				5	5	5	42.1	42.1	42.1	14.865	0	9.8964	6808700000	32	P62832	P62832	60S ribosomal protein L23	Rpl23
26.5609	NaN	26.4079	NaN	26.7797	NaN	NaN	NaN				7	2	2	38.6	14.1	14.1	20.987	0	3.1183	401210000	14	P62836	P62836	Ras-related protein Rap-1A	Rap1a
30.1548	30.1164	30.0324	30.1906	30.6634	NaN	30.2082	NaN				3	3	3	22.1	22.1	22.1	17.04	0	15.169	4768500000	16	P62845	P62845	40S ribosomal protein S15	Rps15
29.9109	28.2754	30.019	29.4612	27.4844	26.9082	29.1981	NaN				4	4	4	34.6	34.6	34.6	15.423	0	8.6617	3646700000	26	P62850	P62850	40S ribosomal protein S24	Rps24
30.9001	31.1184	31.1371	31.3006	30.7611	29.1995	30.6492	28.4918				3	3	3	22.4	22.4	22.4	13.742	0	2.6023	8157000000	34	P62853	P62853	40S ribosomal protein S25	Rps25
30.5631	29.4382	31.293	29.5864	27.9739	NaN	30.2784	28.819				4	4	4	42.6	42.6	42.6	13.015	0	3.4082	5564400000	17	P62856	P62856	40S ribosomal protein S26	Rps26
28.8237	28.9955	29.0742	28.9012	28.4208	27.3231	28.5908	NaN				3	3	3	36.2	36.2	36.2	7.8409	0	5.7432	1906100000	17	P62859	P62859	40S ribosomal protein S28	Rps28
28.3528	29.2355	28.4402	29.1712	28.808	28.4249	28.6291	29.6682				6	6	6	50.8	50.8	50.8	13.17	0	6.8315	1687300000	18	P62870	P62870	Transcription elongation factor B polypeptide 2	Tceb2
31.6552	31.3459	31.8762	31.408	29.4694	27.8796	31.0799	26.4996				5	5	5	57.4	57.4	57.4	12.784	0	42.732	11167000000	47	P62890	P62890	60S ribosomal protein L30	Rpl30
28.5207	28.4753	28.8452	28.5379	27.0803	NaN	27.4301	NaN				5	5	5	48.6	48.6	48.6	11.605	0	15.322	1757200000	27	P62898;CON__P62894	P62898	Cytochrome c, somatic	Cycs
30.827	30.0303	31.0579	30.4024	30.2836	28.7301	30.392	28.2684				4	4	4	31.2	31.2	31.2	14.463	0	3.2112	6583300000	22	P62902	P62902	60S ribosomal protein L31	Rpl31
31.8475	31.3787	31.9221	31.8181	30.9063	28.6113	31.2936	29.8405				8	8	8	34.6	34.6	34.6	24.831	0	17.69	14087000000	62	P62907	P62907	60S ribosomal protein L10a	Rpl10a
32.3961	32.0818	32.603	32.1999	32.4563	30.794	32.4035	32.242				17	17	17	72	72	72	26.674	0	78.257	23661000000	162	P62909	P62909	40S ribosomal protein S3	Rps3
29.9742	28.2447	30.2418	28.6156	27.5536	NaN	27.9205	NaN				5	5	5	34.1	34.1	34.1	15.86	0	9.271	3951900000	21	P62912	P62912	60S ribosomal protein L32	Rpl32
30.3114	29.9902	30.6444	29.6481	30.3913	28.895	29.9677	31.1887				6	6	6	29.2	29.2	29.2	20.252	0	18.32	5475200000	28	P62914	P62914	60S ribosomal protein L11	Rpl11
30.9116	29.8789	31.3544	29.5519	29.8657	29.2885	30.5136	29.9317				4	4	4	25.3	25.3	25.3	28.024	0	73.522	9119200000	25	P62919	P62919	60S ribosomal protein L8	Rpl8
31.9141	31.4321	31.9214	31.6323	31.9568	31.049	31.7726	31.6427				33	33	19	43.1	43.1	27.7	104.55	0	193.68	15430000000	151	P62944	P62944	AP-2 complex subunit beta	Ap2b1
29.9837	29.0274	28.9608	28.1977	NaN	29.0834	27.98	28.716				4	4	4	52.4	52.4	52.4	13.777	0	40.423	1629500000	17	P62959	P62959	Histidine triad nucleotide-binding protein 1	Hint1
30.1564	30.0871	30.3903	29.8409	30.558	29.3103	30.2357	30.0404				9	9	6	42.5	42.5	31.4	35.73	0	213.38	5163300000	49	P62961	P62961	Nuclease-sensitive element-binding protein 1	Ybx1
34.1112	34.586	34.2586	34.5244	33.6325	33.5065	34.045	33.4175				11	11	11	91.4	91.4	91.4	14.957	0	89.804	55288000000	175	P62963;CON__P02584	P62963	Profilin-1	Pfn1
32.3995	32.7137	32.6266	32.6474	32.7421	33.1761	32.1656	33.5166				9	9	9	52.6	52.6	52.6	17.951	0	96.273	29583000000	267	P62982;P62986;P0CG51;Q63429	P62982;P62986;P0CG51;Q63429	Ubiquitin-40S ribosomal protein S27a;Ubiquitin;40S ribosomal protein S27a;Ubiquitin-60S ribosomal protein L40;Ubiquitin;60S ribosomal protein L40;Polyubiquitin-B;Ubiquitin;Polyubiquitin-C;Ubiquitin;Ubiquitin-related	Rps27a;Uba52;Ubb;Ubc
28.8434	30.8768	28.8718	30.6685	29.5324	29.685	29.3086	30.5189				9	9	9	45.2	45.2	45.2	25.206	0	13.031	2009400000	28	P62994	P62994	Growth factor receptor-bound protein 2	Grb2
27.9913	26.1264	27.8573	25.3724	27.0903	NaN	26.8064	NaN				4	4	4	17	17	17	33.665	0	7.6727	727820000	8	P62997	P62997	Transformer-2 protein homolog beta	Tra2b
29.9432	29.4287	29.9404	29.8052	29.9845	28.5259	29.7081	27.3639				11	11	11	42.4	42.4	42.4	46.67	0	85.765	3806700000	56	P63004	P63004	Platelet-activating factor acetylhydrolase IB subunit alpha	Pafah1b1
35.2888	35.5717	35.4741	35.868	35.0664	34.4435	35.4432	34.6595				34	34	24	55.7	55.7	39.3	70.87	0	229.08	157690000000	695	P63018	P63018	Heat shock cognate 71 kDa protein	Hspa8
28.7553	28.4085	28.7381	28.4579	28.3736	NaN	28.7118	NaN				3	3	1	38.8	38.8	15.5	11.48	0	50.715	1460300000	35	P63025	P63025	Vesicle-associated membrane protein 3	Vamp3
29.7272	29.968	29.8134	29.4593	27.5489	NaN	29.1518	NaN				7	7	7	36	36	36	19.462	0	12.381	3319900000	44	P63029	P63029	Translationally-controlled tumor protein	Tpt1
NaN	26.8086	NaN	26.7833	27.0348	NaN	NaN	NaN				2	2	2	15.6	15.6	15.6	12.454	0.0061437	-0.48239	254420000	5	P63031	P63031	Mitochondrial pyruvate carrier 1	Mpc1
28.3671	28.1172	28.6907	28.5172	27.809	NaN	28.3238	NaN				12	12	12	44.3	44.3	44.3	44.868	0	37.193	1587400000	39	P63036	P63036	DnaJ homolog subfamily A member 1	Dnaja1
32.1292	31.5358	32.1162	31.7951	31.9034	31.2184	32.1729	32.6747				20	20	20	49.6	49.6	49.6	60.955	0	180.07	14188000000	129	P63039	P63039	60 kDa heat shock protein, mitochondrial	Hspd1
NaN	NaN	NaN	21.9565	NaN	NaN	NaN	NaN				3	1	1	34.5	13.8	13.8	12.691	0	6.248	46598000	2	P63045	P63045	Vesicle-associated membrane protein 2	Vamp2
28.0024	28.1918	28.0227	28.4777	28.2925	28.1366	28.0561	27.4479				6	6	6	27.6	27.6	27.6	25.053	0	10.22	1244600000	30	P63074	P63074	Eukaryotic translation initiation factor 4E	Eif4e
31.1501	30.3822	30.8495	30.572	30.0986	29.3612	30.5105	28.0671				18	18	14	59.8	59.8	46.9	41.275	0	219.36	7267300000	103	P63086	P63086	Mitogen-activated protein kinase 1	Mapk1
NaN	NaN	NaN	NaN	NaN	NaN	NaN	26.5992				13	2	2	46.1	7.4	7.4	36.983	0	6.2139	292730000	5	P63088	P63088	Serine/threonine-protein phosphatase PP1-gamma catalytic subunit	Ppp1cc
28.6267	28.9198	28.6842	28.9016	28.6315	27.6499	28.0639	27.589				8	7	7	23.9	21.1	21.1	45.663	0	22.026	1730800000	44	P63095;Q63803	P63095;Q63803	Guanine nucleotide-binding protein G(s) subunit alpha isoforms short;Guanine nucleotide-binding protein G(s) subunit alpha isoforms XLas	Gnas
NaN	28.3648	27.7419	NaN	27.7234	NaN	27.4344	NaN				4	4	4	29.4	29.4	29.4	19.3	0	4.8347	550840000	5	P63100	P63100	Calcineurin subunit B type 1	Ppp3r1
33.7216	33.8772	33.6184	34.1214	34.1457	33.6746	33.6793	34.2449				16	14	12	62.9	55.5	51.8	27.771	0	272.26	54918000000	177	P63102	P63102	14-3-3 protein zeta/delta	Ywhaz
32.0329	31.3662	32.0254	31.1032	31.4778	NaN	31.7603	29.685				6	6	5	26.5	26.5	20.9	24.893	0	15.931	14971000000	53	P63159	P63159	High mobility group protein B1	Hmgb1
28.1755	27.3969	28.746	27.4087	NaN	NaN	27.4682	NaN				5	5	5	18.8	18.8	18.8	24.614	0	10.127	1413100000	14	P63164;P17136	P63164;P17136	Small nuclear ribonucleoprotein-associated protein N;Small nuclear ribonucleoprotein-associated protein B	Snrpn;Snrpb
30.2815	28.6005	29.9998	29.5174	29.2705	NaN	29.6417	NaN				4	4	1	50.6	50.6	24.7	10.366	0	87.359	3483000000	44	P63170	P63170	Dynein light chain 1, cytoplasmic	Dynll1
31.8682	30.912	32.0859	31.3463	31.0548	29.7158	31.4553	30.6096				16	16	16	71.3	71.3	71.3	35.076	0	266.63	14858000000	124	P63245	P63245	Guanine nucleotide-binding protein subunit beta-2-like 1;Guanine nucleotide-binding protein subunit beta-2-like 1, N-terminally processed	Gnb2l1
NaN	NaN	NaN	NaN	NaN	NaN	NaN	NaN				28	1	1	78.1	4.5	4.5	41.792	0	57.257	0	0	P63259	P63259	Actin, cytoplasmic 2;Actin, cytoplasmic 2, N-terminally processed	Actg1
28.2243	28.9479	28.7495	28.7647	28.5273	27.5673	28.3022	NaN				5	5	5	31.6	31.6	31.6	18.007	0	17.394	1573000000	20	P63281	P63281	SUMO-conjugating enzyme UBC9	Ube2i
27.0954	26.9163	26.8247	27.0971	27.0385	NaN	26.9113	NaN				3	2	2	18.4	13.1	13.1	23.553	0	4.726	503520000	13	P63322	P63322	Ras-related protein Ral-A	Rala
29.7939	30.3455	30.3039	29.8199	29.9411	NaN	29.707	NaN				6	6	6	58.3	58.3	58.3	14.525	0	40.443	4563100000	28	P63324	P63324	40S ribosomal protein S12	Rps12
30.0783	27.6361	30.2871	28.8834	27.2896	27.4778	29.0264	27.2734				4	4	4	28.5	28.5	28.5	18.916	0	9.7389	3486900000	36	P63326	P63326	40S ribosomal protein S10	Rps10
27.741	28.343	27.5219	28.451	28.1814	27.6732	28.303	28.1979				8	8	3	18.4	18.4	8.8	58.643	0	30.062	1194100000	21	P63329	P63329	Serine/threonine-protein phosphatase 2B catalytic subunit alpha isoform	Ppp3ca
29.6888	29.0246	30.3908	29.6407	27.4893	24.6662	29.4333	26.2927				11	11	1	49.2	49.2	4.2	35.608	0	136.22	3984500000	79	P63331	P63331	Serine/threonine-protein phosphatase 2A catalytic subunit alpha isoform	Ppp2ca
30.8212	30.9816	30.578	30.7685	29.9665	29.9045	30.9268	30.4101				12	12	12	51.8	51.8	51.8	29.82	0	36.786	5745800000	67	P67779	P67779	Prohibitin	Phb
27.4211	26.8182	27.6555	26.5452	26.4758	NaN	27.2288	NaN				5	5	5	34	34	34	24.942	0	14.996	691320000	15	P67874	P67874	Casein kinase II subunit beta	Csnk2b
30.0871	30.2787	30.155	30.3561	30.6427	29.8283	30.0173	30.8945				16	16	16	60.6	60.6	60.6	36.108	0	64.324	6047400000	83	P68101	P68101	Eukaryotic translation initiation factor 2 subunit 1	Eif2s1
28.1664	27.611	28.3726	27.7044	26.0664	NaN	27.2455	NaN				5	5	3	16	16	10.5	40.707	0	10.304	909350000	15	P68182	P68182	cAMP-dependent protein kinase catalytic subunit beta	Prkacb
32.7815	32.3252	32.5966	32.3454	33.0022	31.8393	32.3695	31.7791				15	11	10	56.7	45.7	42.4	27.778	0	91.663	22197000000	93	P68255	P68255	14-3-3 protein theta	Ywhaq
25.9117	29.7836	NaN	30.3025	26.3885	27.3251	27.0098	27.5856				10	10	10	16.8	16.8	16.8	76.75	0	21.193	742770000	23	P68403;P05696	P68403;P05696	Protein kinase C beta type;Protein kinase C alpha type	Prkcb;Prkca
30.7999	32.2636	30.7607	32.4522	32.2758	32.1915	31.4322	32.5257				13	10	9	54.5	47.2	43.1	28.211	0	99.236	9551500000	73	P68511	P68511	14-3-3 protein eta	Ywhah
NaN	NaN	NaN	NaN	26.5988	NaN	NaN	NaN				2	2	2	4.6	4.6	4.6	48.129	0.0010256	0.71126	108630000	5	P69060	P69060	N-acylneuraminate cytidylyltransferase	Cmas
25.4031	26.5303	25.8868	26.4895	25.7932	NaN	26.2495	NaN				5	5	5	9	9	9	86.586	0	3.1969	252770000	7	P69735	P69735	Rab3 GTPase-activating protein catalytic subunit	Rab3gap1
26.0439	26.5011	26.3212	25.4943	NaN	NaN	25.9073	NaN				2	2	2	18.2	18.2	18.2	16.369	0	3.6957	284710000	7	P69736	P69736	Endothelial differentiation-related factor 1	Edf1
32.986	32.2592	33.1587	31.7198	31.8251	29.0281	31.9088	29.4901				25	6	4	69.1	25	16	49.67	0	142.31	30237000000	131	P69897	P69897	Tubulin beta-5 chain	Tubb5
27.1121	26.4241	26.9695	25.8504	26.4693	NaN	26.1378	NaN				5	5	5	33	33	33	24.708	0	8.3307	496710000	10	P70470	P70470	Acyl-protein thioesterase 1	Lypla1
NaN	NaN	23.8427	23.6067	NaN	NaN	NaN	NaN				2	2	2	5.5	5.5	5.5	41.828	0.0010241	0.68595	49697000	2	P70473	P70473	Alpha-methylacyl-CoA racemase	Amacr
NaN	NaN	NaN	NaN	NaN	NaN	24.1344	NaN				2	2	2	3.3	3.3	3.3	86.225	0	3.275	69592000	3	P70483	P70483	Striatin	Strn
28.9691	NaN	28.7177	NaN	28.6737	NaN	27.3487	NaN				12	12	12	33.7	33.7	33.7	47.412	0	25.768	1600300000	24	P70490	P70490	Lactadherin	Mfge8
25.9856	24.8198	25.5856	24.4601	25.3589	NaN	25.6859	NaN				5	5	5	5.4	5.4	5.4	123.81	0.0010168	0.60361	200540000	8	P70496	P70496	Phospholipase D1	Pld1
27.6192	NaN	26.9076	26.2364	25.5774	NaN	26.4166	NaN				2	2	2	10.3	10.3	10.3	23.613	0	3.2229	481030000	10	P70500	P70500	CDP-diacylglycerol--inositol 3-phosphatidyltransferase	Cdipt
25.4605	NaN	25.5491	NaN	NaN	NaN	25.202	NaN				5	5	5	13.1	13.1	13.1	50.435	0	8.053	170490000	5	P70541	P70541	Translation initiation factor eIF-2B subunit gamma	Eif2b3
28.866	30.5154	28.6355	30.6392	28.5985	28.8762	29.4877	NaN				4	2	2	21.7	12.6	12.6	23.603	0	28.969	2198800000	19	P70550;P35289;Q63941;P63012;P62824	P70550	Ras-related protein Rab-8B	Rab8b
27.4366	28.4973	NaN	29.5026	27.7976	27.9427	28.3204	NaN				3	3	3	6.5	6.5	6.5	55.921	0	7.0265	578770000	15	P70553	P70553	Natural resistance-associated macrophage protein 1	Slc11a1
26.4333	NaN	25.6436	NaN	NaN	NaN	NaN	NaN				3	3	3	12.3	12.3	12.3	32.001	0	5.375	176090000	4	P70560	P70560	Collagen alpha-1(XII) chain	Col12a1
30.2357	30.322	30.1816	30.488	30.6535	29.5053	30.3018	30.8405				9	9	8	62.6	62.6	57.9	21.598	0	163.07	5856500000	78	P70580	P70580	Membrane-associated progesterone receptor component 1	Pgrmc1
25.6953	26.16	25.2466	26.1421	25.9173	NaN	26.0235	NaN				2	2	2	3.6	3.6	3.6	59.264	0	3.3161	195780000	6	P70581	P70581	Nucleoporin p58/p45	Nupl1
25.0449	25.7211	25.4516	25.5038	NaN	NaN	25.2262	NaN				4	4	4	10.4	10.4	10.4	55.744	0	7.9959	171800000	8	P70582	P70582	Nuclear pore complex protein Nup54	Nup54
NaN	24.7749	24.3621	27.152	NaN	NaN	25.0239	NaN				6	5	5	6.4	5.6	5.6	115.78	0.0024474	0.066167	102200000	5	P70600	P70600	Protein-tyrosine kinase 2-beta	Ptk2b
30.4925	29.9858	30.7546	29.0916	30.8546	30.3734	30.1737	31.1784				20	18	18	34.4	32.9	32.9	66.606	0	83.991	5862700000	85	P70615	P70615	Lamin-B1	Lmnb1
28.1401	28.462	28.1609	28.4589	28.0746	NaN	28.0133	NaN				8	8	7	25.8	25.8	23.6	41.321	0	20.127	1549100000	31	P70618	P70618	Mitogen-activated protein kinase 14	Mapk14
27.2569	28.1137	27.0718	28.3918	27.6464	27.5207	27.9064	NaN				7	7	7	22.9	22.9	22.9	46.301	0	16.728	897070000	25	P70619	P70619	Glutathione reductase	Gsr
27.3115	32.0324	26.7747	31.7837	29.5601	29.5236	29.4095	27.7916				5	5	5	38.6	38.6	38.6	14.708	0	15.764	3260800000	35	P70623	P70623	Fatty acid-binding protein, adipocyte	Fabp4
29.3411	28.4506	29.4764	28.7154	28.2055	28.2536	28.782	26.9771				15	15	15	42.1	42.1	42.1	52.322	0	41.07	2544600000	49	P70645	P70645	Bleomycin hydrolase	Blmh
NaN	NaN	24.8164	25.648	NaN	NaN	NaN	NaN				3	3	3	2.1	2.1	2.1	162.09	0	1.8311	87746000	3	P70705	P70705	Copper-transporting ATPase 1	Atp7a
29.5322	29.6374	29.5776	28.472	29.6655	28.8134	29.7717	NaN				8	8	8	24.9	24.9	24.9	52.235	0	86.89	3099300000	42	P80067	P80067	Dipeptidyl peptidase 1;Dipeptidyl peptidase 1 exclusion domain chain;Dipeptidyl peptidase 1 heavy chain;Dipeptidyl peptidase 1 light chain	Ctsc
27.8705	26.6812	28.3548	25.8636	24.765	NaN	26.6239	NaN				5	5	5	62.7	62.7	62.7	13.133	0	51.619	857930000	20	P80254	P80254	D-dopachrome decarboxylase	Ddt
26.9502	28.4332	27.0876	28.4667	27.7798	27.4013	27.5234	27.8568				7	7	7	25.5	25.5	25.5	37.386	0	5.3119	729920000	19	P80385	P80385	5-AMP-activated protein kinase subunit gamma-1	Prkag1
30.9521	31.3443	30.8542	30.9572	31.6107	30.6122	31.0845	30.3355				11	11	10	53.9	53.9	50.5	31.745	0	175.57	8634500000	94	P81155	P81155	Voltage-dependent anion-selective channel protein 2	Vdac2
28.6178	32.6704	28.4428	32.2405	30.3447	32.058	29.856	32.6353				22	22	22	43.1	43.1	43.1	69.577	0	74.686	6072300000	89	P81718	P81718	Tyrosine-protein phosphatase non-receptor type 6	Ptpn6
30.5656	30.2159	30.4279	30.3335	30.4158	28.1514	30.4407	29.4204				12	12	3	34.3	34.3	8.5	51.079	0	62.783	5660200000	65	P81795	P81795	Eukaryotic translation initiation factor 2 subunit 3	Eif2s3
26.7497	27.7541	26.8114	27.923	27.802	NaN	27.3187	27.4143				6	6	6	23.6	23.6	23.6	37.196	0	6.7774	617460000	22	P81799	P81799	N-acetyl-D-glucosamine kinase	Nagk
25.1636	NaN	24.3445	NaN	NaN	NaN	25.5953	NaN				2	2	2	4.8	4.8	4.8	60.466	0	2.0793	118260000	5	P82450	P82450	Sialate O-acetylesterase;Sialate O-acetylesterase small subunit;Sialate O-acetylesterase large subunit	Siae
29.6286	28.2494	28.9802	28.0006	29.2093	28.2079	28.4446	28.3343				12	12	8	35.4	35.4	22.3	42.144	0	97.542	1971800000	35	P82471	P82471	Guanine nucleotide-binding protein G(q) subunit alpha	Gnaq
30.0523	28.8775	29.6102	29.242	28.849	27.456	28.9092	27.5239				19	19	14	37.2	37.2	28	76.826	0	53.011	3122200000	50	P82808	P82808	Glutamine--fructose-6-phosphate aminotransferase [isomerizing] 1	Gfpt1
32.9473	32.9546	33.1307	33.2656	32.6571	31.7477	32.5828	32.0937				33	21	21	49.2	34.7	34.7	84.814	0	269.29	29479000000	259	P82995	P82995	Heat shock protein HSP 90-alpha	Hsp90aa1
30.644	29.4736	30.6235	29.7762	29.0253	NaN	29.6947	NaN				5	5	5	30.6	30.6	30.6	17.779	0	8.6762	5564400000	41	P83732	P83732	60S ribosomal protein L24	Rpl24
29.6502	29.1343	30.4855	29.1238	29.0709	29.2864	29.142	30.2562				6	6	6	37.5	37.5	37.5	18.721	0	20.594	3119700000	37	P83868	P83868	Prostaglandin E synthase 3	Ptges3
25.4893	25.7086	26.1009	25.5136	NaN	NaN	25.8934	NaN				3	3	3	34.5	34.5	34.5	12.405	0	6.2387	275730000	9	P83871	P83871	PHD finger-like domain-containing protein 5A	Phf5a
NaN	NaN	24.8622	NaN	NaN	NaN	NaN	NaN				2	2	2	6.7	6.7	6.7	51.1	0	2.7398	92401000	6	P83888	P83888	Tubulin gamma-1 chain	Tubg1
26.4956	26.6081	27.2574	26.7674	NaN	NaN	25.2188	NaN				3	3	3	40.2	40.2	40.2	12.473	0	18.973	378520000	14	P83941	P83941	Transcription elongation factor B polypeptide 1	Tceb1
28.0512	28.0445	28.2467	28.3533	28.3176	NaN	27.0186	NaN				6	6	6	14.3	14.3	14.3	60.136	0	19.105	1014600000	16	P83953;Q56R16	P83953;Q56R16	Importin subunit alpha-5;Importin subunit alpha-5, N-terminally processed;Importin subunit alpha-6	Kpna1;Kpna5
NaN	NaN	NaN	NaN	21.2607	NaN	NaN	NaN				4	1	1	23.3	4.1	4.1	22.427	0.0010025	0.38514	9636600	2	P84076;Q5PQN0	P84076;Q5PQN0	Neuron-specific calcium-binding protein hippocalcin;Neurocalcin-delta	Hpca;Ncald
31.5927	30.9523	31.823	31.6571	30.8345	29.9739	31.2203	29.4501				11	11	5	64.4	64.4	27.8	20.529	0	215.45	12661000000	81	P84083	P84083	ADP-ribosylation factor 5	Arf5
30.6624	29.9701	30.7151	30.5106	30.9685	29.4601	30.7712	30.1806				14	14	14	38.6	38.6	38.6	49.654	0	23.445	6373400000	48	P84092	P84092	AP-2 complex subunit mu	Ap2m1
30.9475	30.2844	31.369	31.2391	30.3236	29.1824	30.6659	29.6486				6	6	6	26.5	26.5	26.5	23.466	0	37.52	7397200000	31	P84100	P84100	60S ribosomal protein L19	Rpl19
28.8573	29.0857	29.3868	28.5147	29.3273	28.2597	29.1363	28.2536				6	6	2	21.4	21.4	8.5	42.203	0	15.952	2202300000	19	P84586;D4AE41	P84586;D4AE41	RNA-binding motif protein, X chromosome retrogene-like;RNA-binding motif protein, X chromosome retrogene-like, N-terminally processed;RNA binding motif protein, X-linked-like-1	Rbmxrtl;Rbmxl1
28.9854	28.9308	28.722	28.8167	27.1699	NaN	28.5049	NaN				3	3	3	23	23	23	16.994	0	6.708	1308000000	12	P84817	P84817	Mitochondrial fission 1 protein	Fis1
25.4243	25.3624	25.1496	25.6286	NaN	NaN	NaN	NaN				3	3	3	5	5	5	77.448	0	21.669	164340000	4	P84903	P84903	Stromal interaction molecule 1	Stim1
27.8537	27.4045	28.2261	28.0183	26.9198	NaN	28.183	NaN				2	2	2	34.1	34.1	34.1	8.9987	0	13.916	1077500000	14	P85007	P85007	Immediate early response 3-interacting protein 1	Ier3ip1
29.7398	28.4082	30.0729	28.154	28.4614	NaN	28.8851	26.5918				24	6	1	67	22.2	2.7	49.906	0	59.843	3261500000	40	P85108	P85108	Tubulin beta-2A chain	Tubb2a
31.0007	NaN	30.9007	24.7591	27.4433	26.1289	28.3989	24.9211				13	13	13	44.9	44.9	44.9	43.908	0	242.33	4779100000	42	P85125	P85125	Polymerase I and transcript release factor	Ptrf
30.214	28.7091	29.9796	29.6274	29.033	NaN	29.5021	27.3162				12	12	12	44.9	44.9	44.9	42.613	0	102.82	3745700000	56	P85515	P85515	Alpha-centractin	Actr1a
29.8859	29.7846	29.7661	29.6521	29.6939	29.039	29.7333	29.5958				16	16	16	40.5	40.5	40.5	49.522	0	40.179	3639100000	63	P85834	P85834	Elongation factor Tu, mitochondrial	Tufm
32.402	33.1402	32.488	33.453	32.5182	33.2982	32.4324	33.7738				20	20	20	47.1	47.1	47.1	54.49	0	236.64	20650000000	161	P85845	P85845	Fascin	Fscn1
33.1534	33.7616	33.2692	34.3614	33.789	33.2425	33.8588	33.4503				22	22	22	53.4	53.4	53.4	53.236	0	167.52	42792000000	269	P85968	P85968	6-phosphogluconate dehydrogenase, decarboxylating	Pgd
31.7729	33.1155	31.9795	33.0926	32.1082	31.7664	32.1313	32.2197				16	16	16	54.3	54.3	54.3	34.391	0	36.202	21164000000	167	P85970	P85970	Actin-related protein 2/3 complex subunit 2	Arpc2
28.8073	29.0042	28.7214	28.4607	28.2799	27.9156	28.1586	27.2817				7	7	7	43.2	43.2	43.2	27.234	0	88.301	1723100000	42	P85971	P85971	6-phosphogluconolactonase	Pgls
34.3543	30.2477	34.0568	30.5049	34.2077	32.4944	32.7698	31.6954				61	61	61	62.3	62.3	62.3	116.61	0	323.31	56410000000	306	P85972	P85972	Vinculin	Vcl
32.5676	33.2681	33.0633	33.5761	31.8677	32.6193	33.1275	32.2637				18	18	18	83.4	83.4	83.4	32.302	0	278.26	25079000000	208	P85973	P85973	Purine nucleoside phosphorylase	Pnp
27.2472	28.0615	27.1538	27.7331	27.8874	NaN	27.3393	NaN				15	15	15	37.2	37.2	37.2	70.854	0	22.645	793630000	37	P86182	P86182	Coiled-coil domain-containing protein 22	Ccdc22
27.201	25.384	27.2654	25.6802	25.858	NaN	25.7438	NaN				4	4	4	63	63	63	15.322	0	24.321	484800000	11	P86252	P86252	Transcriptional activator protein Pur-alpha	Pura
NaN	NaN	NaN	24.3378	NaN	NaN	NaN	NaN				2	2	2	8	8	8	34.191	0	6.3765	38412000	1	P97519	P97519	Hydroxymethylglutaryl-CoA lyase, mitochondrial	Hmgcl
NaN	28.5461	NaN	29.0774	NaN	NaN	NaN	NaN				4	4	4	10.8	10.8	10.8	39.416	0.00054142	1.6014	309920000	7	P97520	P97520	C5a anaphylatoxin chemotactic receptor 1	C5ar1
29.1327	29.0752	29.0506	29.1074	29.3795	28.2842	29.2613	NaN				11	11	11	38.5	38.5	38.5	33.154	0	4.3267	2124300000	26	P97521	P97521	Mitochondrial carnitine/acylcarnitine carrier protein	Slc25a20
26.7693	27.6056	26.5567	27.318	NaN	NaN	27.411	NaN				5	5	5	23.9	23.9	23.9	32.94	0	6.4074	594950000	14	P97532	P97532	3-mercaptopyruvate sulfurtransferase	Mpst
31.3524	30.0367	31.4975	30.7277	30.391	26.5787	31.0564	29.6909				32	32	31	32.9	32.9	32.3	136.36	0	138.76	9291400000	128	P97536	P97536	Cullin-associated NEDD8-dissociated protein 1	Cand1
27.0612	NaN	27.5304	NaN	26.5591	NaN	27.4204	NaN				4	4	4	15.7	15.7	15.7	35.318	0	6.6905	670460000	12	P97544	P97544	Lipid phosphate phosphohydrolase 3	Ppap2b
27.1533	27.9745	27.3294	28.4514	28.5954	28.1234	27.7872	NaN				5	5	5	15.5	15.5	15.5	43.931	0	1.7689	1073200000	12	P97546	P97546	Neuroplastin	Nptn
29.4284	29.428	29.5057	29.3673	29.4242	28.2974	29.1434	27.5731				25	25	25	41.7	41.7	41.7	82.118	0	56.336	2947800000	73	P97571	P97571	Calpain-1 catalytic subunit	Capn1
27.4509	29.7823	27.768	29.6292	29.0531	28.2579	28.8769	28.8556				16	16	16	16	16	16	133.59	0	41.458	1247300000	41	P97573	P97573	Phosphatidylinositol 3,4,5-trisphosphate 5-phosphatase 1	Inpp5d
NaN	26.0914	NaN	25.0925	25.0349	NaN	NaN	NaN				3	3	3	14.3	14.3	14.3	24.297	0	1.7993	132670000	7	P97576	P97576	GrpE protein homolog 1, mitochondrial	Grpel1
28.352	NaN	28.4193	25.9155	27.4064	NaN	28.7012	NaN				7	7	7	27.7	27.7	27.7	35.718	0	20.231	1322900000	21	P97584	P97584	Prostaglandin reductase 1	Ptgr1
28.2914	29.8215	28.1245	29.0375	28.6728	28.6686	28.7305	NaN				17	17	17	18.5	18.5	18.5	137.72	0	61.773	1344200000	49	P97608	P97608	5-oxoprolinase	Oplah
28.106	28.458	28.2167	28.6192	28.0283	27.7431	27.8407	NaN				14	14	14	15.9	15.9	15.9	117.2	0	21.605	1215900000	28	P97629	P97629	Leucyl-cystinyl aminopeptidase	Lnpep
28.9985	28.1773	29.5531	28.2893	28.3692	29.4103	28.5128	NaN				7	7	7	22.2	22.2	22.2	37.495	0	6.0997	927780000	17	P97633	P97633	Casein kinase I isoform alpha	Csnk1a1
NaN	25.9457	23.8736	NaN	NaN	NaN	NaN	NaN				2	2	2	10.8	10.8	10.8	22.303	0.0092937	-0.74143	88026000	2	P97636	P97636	Interleukin-18	Il18
27.9932	29.0941	28.313	30.5648	28.7729	NaN	29.1024	29.5417				14	14	14	21.9	21.9	21.9	99.071	0	10.883	1991500000	29	P97675	P97675	Ectonucleotide pyrophosphatase/phosphodiesterase family member 3;Alkaline phosphodiesterase I;Nucleotide pyrophosphatase	Enpp3
27.1252	26.6298	26.6867	26.9464	NaN	NaN	26.5918	NaN				9	9	9	11.2	11.2	11.2	138.45	0	29.503	512340000	14	P97690	P97690	Structural maintenance of chromosomes protein 3	Smc3
25.6593	26.6568	NaN	26.7799	NaN	NaN	NaN	NaN				2	2	2	7.5	7.5	7.5	46.273	0.0010331	0.82529	206660000	3	P97694;P97696;P63035	P97694;P97696;P63035	Cytohesin-1;Cytohesin-3;Cytohesin-2	Cyth1;Cyth3;Cyth2
29.2437	30.1226	29.2733	29.7908	29.7026	28.8484	29.4682	28.1073				7	7	7	25.3	25.3	25.3	30.511	0	15.165	2072400000	38	P97697	P97697	Inositol monophosphatase 1	Impa1
28.0034	28.396	28.1991	28.7572	28.1606	NaN	27.7406	26.501				7	7	7	22.9	22.9	22.9	34.133	0	4.7087	1211100000	29	P97700	P97700	Mitochondrial 2-oxoglutarate/malate carrier protein	Slc25a11
26.9789	30.8142	26.5966	30.8393	28.0898	29.0696	27.1501	29.6644				6	6	6	13	13	13	55.69	0	6.0457	1188500000	14	P97710	P97710	Tyrosine-protein phosphatase non-receptor type substrate 1	Sirpa
27.0108	27.58	27.6047	28.7448	27.387	NaN	28.2315	NaN				4	4	4	14.9	14.9	14.9	32.995	0	7.0019	989440000	16	P97829	P97829	Leukocyte surface antigen CD47	Cd47
27.8888	27.9025	28.268	28.1152	28.1894	NaN	27.4419	NaN				7	7	7	20.8	20.8	20.8	53.428	0	8.0408	829930000	18	P97834	P97834	COP9 signalosome complex subunit 1	Gps1
25.81	NaN	27.4324	25.3391	25.6737	NaN	25.9708	NaN				5	5	5	17.8	17.8	17.8	39.945	0	12.482	458510000	10	P97840;P47967	P97840	Galectin-9	Lgals9
30.7083	29.9399	30.4984	29.9527	30.3082	28.7323	30.2038	29.3952				22	22	22	39	39	39	79.427	0	100.8	5970000000	65	P97852	P97852	Peroxisomal multifunctional enzyme type 2;(3R)-hydroxyacyl-CoA dehydrogenase;Enoyl-CoA hydratase 2	Hsd17b4
26.99	27.5913	27.2404	27.8986	26.8636	NaN	27.4586	NaN				11	11	11	9.3	9.3	9.3	143.7	0	3.055	619860000	18	P97874	P97874	Cyclin-G-associated kinase	Gak
25.8163	25.9199	25.6002	25.9621	NaN	NaN	25.6735	NaN				5	5	5	7.8	7.8	7.8	81.736	0	3.0308	226280000	9	P97878	P97878	Exocyst complex component 5	Exoc5
NaN	25.1691	24.5747	26.2762	NaN	NaN	NaN	NaN				2	2	2	7.5	7.5	7.5	52.789	0	4.1391	89756000	4	P97887	P97887	Presenilin-1;Presenilin-1 NTF subunit;Presenilin-1 CTF subunit;Presenilin-1 CTF12	Psen1
NaN	NaN	NaN	NaN	27.1991	NaN	NaN	NaN				2	2	2	0.5	0.5	0.5	519.27	0.0097357	-0.79322	245290000	2	P98158	P98158	Low-density lipoprotein receptor-related protein 2	Lrp2
30.4001	28.6122	31.1775	30.0841	29.9333	27.9301	30.243	29.0788				9	9	9	19.1	19.1	19.1	60.141	0	42.637	5997800000	59	Q00238	Q00238	Intercellular adhesion molecule 1	Icam1
31.279	30.1815	31.6814	30.2749	31.4002	NaN	31.0055	30.8359				11	11	10	25.2	25.2	23.8	59.353	0	210.05	10881000000	76	Q00438	Q00438	Polypyrimidine tract-binding protein 1	Ptbp1
35.1815	35.2038	35.3467	35.4572	34.4262	34.5878	35.0738	34.6443				6	6	6	38.4	38.4	38.4	13.99	0	58.8	108650000000	98	Q00715;Q00729	Q00715;Q00729	Histone H2B type 1;Histone H2B type 1-A	Hist1h2ba
28.8743	NaN	29.2152	NaN	28.9868	NaN	28.1717	27.4203				5	5	5	32.3	32.3	32.3	24.838	0	14.015	1634900000	19	Q00981	Q00981	Ubiquitin carboxyl-terminal hydrolase isozyme L1	Uchl1
28.6346	28.3181	28.6208	28.8253	27.4355	NaN	28.6474	27.4908				6	6	6	20.5	20.5	20.5	48.925	0	48.015	1487200000	31	Q01205	Q01205	Dihydrolipoyllysine-residue succinyltransferase component of 2-oxoglutarate dehydrogenase complex, mitochondrial	Dlst
28.1678	28.1923	27.507	27.6983	28.9906	NaN	28.3315	NaN				6	6	6	19.6	19.6	19.6	41.531	0	16.158	812850000	16	Q01460	Q01460	Di-N-acetylchitobiase	Ctbs
29.0904	30.1122	30.0718	30.4256	29.8879	28.1689	29.7311	28.8875				12	12	7	28	28	14.8	43.465	0	37.139	3934300000	53	Q01986	Q01986	Dual specificity mitogen-activated protein kinase kinase 1	Map2k1
27.3334	26.8882	27.0981	26.7854	27.0179	26.5322	27.3612	NaN				10	10	10	22.6	22.6	22.6	57.807	0	16.446	636120000	15	Q02253	Q02253	Methylmalonate-semialdehyde dehydrogenase [acylating], mitochondrial	Aldh6a1
24.7918	24.828	25.1038	24.8817	24.5494	NaN	24.5439	NaN				3	3	3	3.9	3.9	3.9	94.786	0	3.0346	142190000	5	Q02356	Q02356	AMP deaminase 2	Ampd2
27.1362	26.9507	26.5106	27.1482	26.9896	NaN	27.1557	NaN				5	5	5	17.7	17.7	17.7	39.961	0	29.81	571690000	12	Q02589	Q02589	[Protein ADP-ribosylarginine] hydrolase	Adprh
25.7956	28.6498	25.8695	27.6267	25.9099	27.0421	26.9646	NaN				4	4	4	17.6	17.6	17.6	36.833	0	30.813	370180000	16	Q02765	Q02765	Cathepsin S	Ctss
24.5289	NaN	NaN	NaN	NaN	NaN	NaN	NaN				2	2	2	6	6	6	48.106	0	3.5104	44511000	2	Q02769	Q02769	Squalene synthase	Fdft1
32.556	32.6144	32.7076	32.4694	32.5935	31.0355	32.4985	30.7682				12	12	12	41.2	41.2	41.2	39.503	0	24.25	10018000000	56	Q02874	Q02874	Core histone macro-H2A.1	H2afy
25.022	25.3325	25.6564	24.9592	24.8303	NaN	NaN	NaN				4	3	3	13	10.3	10.3	33.254	0.0010147	0.57504	158430000	7	Q03114	Q03114	Cyclin-dependent-like kinase 5	Cdk5
27.319	28.7946	26.466	28.4615	28.002	28.6967	27.8048	NaN				2	2	2	22.4	22.4	22.4	12.248	0.0010121	0.53551	763130000	10	Q03344	Q03344	ATPase inhibitor, mitochondrial	Atpif1
NaN	NaN	NaN	NaN	NaN	NaN	23.5206	NaN				2	2	2	4.9	4.9	4.9	54.265	0.0047847	-0.28799	62333000	2	Q03346	Q03346	Mitochondrial-processing peptidase subunit beta	Pmpcb
NaN	NaN	26.4069	NaN	NaN	NaN	NaN	NaN				3	3	3	4	4	4	90.259	0.00052687	1.2185	150560000	3	Q03348	Q03348	Receptor-type tyrosine-protein phosphatase alpha	Ptpra
24.4694	25.2891	24.6793	25.7317	24.3479	NaN	24.9149	NaN				3	3	3	4.9	4.9	4.9	83.265	0.0010336	0.8411	126210000	6	Q03555	Q03555	Gephyrin;Molybdopterin adenylyltransferase;Molybdopterin molybdenumtransferase	Gphn
30.1982	29.7493	30.2699	29.681	30.0588	28.1854	30.5456	28.5732				32	32	32	32	32	32	140.37	0	49.305	4919800000	83	Q04462	Q04462	Valine--tRNA ligase	Vars
26.3538	25.4146	26.3502	NaN	NaN	NaN	25.4802	NaN				5	5	5	14.3	14.3	14.3	44.049	0	7.5046	284530000	12	Q04631	Q04631	Protein farnesyltransferase/geranylgeranyltransferase type-1 subunit alpha	Fnta
25.7946	NaN	25.8198	NaN	NaN	NaN	NaN	NaN				2	2	2	11	11	11	26.092	0	7.0785	177730000	5	Q04753	Q04753	Methylosome subunit pICln	Clns1a
26.119	26.9255	27.6559	25.8021	25.7986	NaN	27.3987	NaN				7	7	7	11.3	11.3	11.3	80.914	0	8.4924	596910000	12	Q04931	Q04931	FACT complex subunit SSRP1	Ssrp1
27.3632	27.8488	27.4682	27.8216	26.7032	26.3499	27.1784	NaN				6	6	2	38.1	38.1	12.7	21.243	0	9.8914	812050000	30	Q04970	Q04970	GTPase NRas	Nras
27.6322	NaN	27.1899	NaN	26.9444	NaN	26.475	NaN				8	8	8	11.2	11.2	11.2	122.83	0	11.28	563340000	15	Q05030	Q05030	Platelet-derived growth factor receptor beta	Pdgfrb
29.1429	NaN	29.1784	NaN	28.2912	NaN	27.9526	NaN				22	22	22	23.5	23.5	23.5	131.92	0	80.961	1913700000	37	Q05096;Q62774	Q05096	Unconventional myosin-Ib	Myo1b
29.7603	29.4483	29.8828	29.1612	30.9459	30.6981	29.9147	31.2159				9	9	9	69.5	69.5	69.5	21.79	0	88.129	3913200000	32	Q05175	Q05175	Brain acid soluble protein 1	Basp1
NaN	26.6305	29.1597	28.7345	NaN	NaN	28.8315	NaN				8	8	8	29.1	29.1	29.1	41.665	0	61.084	1593700000	17	Q05961	Q05961	2-5-oligoadenylate synthase 1A	Oas1a
31.3213	30.1504	31.2812	30.2652	30.6028	29.5408	30.8193	29.4124				15	9	9	42.3	26.2	26.2	32.989	0	34.712	9042100000	66	Q05962	Q05962	ADP/ATP translocase 1	Slc25a4
28.7852	28.7015	29.1807	28.1862	27.8241	NaN	28.4527	NaN				11	4	4	75.7	35.5	35.5	17.193	0	9.7205	1894200000	13	Q05982	Q05982	Nucleoside diphosphate kinase A	Nme1
NaN	26.7764	NaN	NaN	NaN	NaN	NaN	NaN				2	2	2	3.8	3.8	3.8	53.082	0.0061408	-0.4976	30374000	2	Q06000	Q06000	Lipoprotein lipase	Lpl
25.1298	24.95	25.4347	25.0547	24.9555	NaN	24.9313	NaN				3	3	3	8.7	8.7	8.7	47.316	0.00052854	1.2648	152350000	3	Q06486	Q06486	Casein kinase I isoform delta	Csnk1d
23.8759	26.3909	31.9119	35.2029	NaN	NaN	33.3006	32.6298				42	42	41	47.2	47.2	46.4	130.63	0	300.97	24976000000	191	Q06518	Q06518	Nitric oxide synthase, inducible	Nos2
30.0947	30.0194	30.1448	29.4123	29.2687	27.4676	29.6663	NaN				9	9	9	58.2	58.2	58.2	23.397	0	51.094	4093600000	57	Q06647	Q06647	ATP synthase subunit O, mitochondrial	Atp5o
30.803	31.0465	30.7458	31.3249	31.2208	30.063	31.2231	30.2613				23	23	23	48.4	48.4	48.4	79.918	0	184.07	8153200000	112	Q07009	Q07009	Calpain-2 catalytic subunit	Capn2
27.559	29.3203	27.9117	29.6964	27.0444	28.0371	28.5683	NaN				14	14	13	33.6	33.6	32	58.659	0	18.186	1213400000	31	Q07014	Q07014	Tyrosine-protein kinase Lyn	Lyn
28.2787	27.8627	28.3033	28.1831	27.7907	NaN	27.4787	NaN				8	8	8	24.2	24.2	24.2	48.954	0	22.161	1092300000	29	Q07205	Q07205	Eukaryotic translation initiation factor 5	Eif5
27.8967	NaN	28.5692	NaN	27.7681	NaN	27.298	NaN				11	11	11	21.1	21.1	21.1	77.471	0	49.07	935500000	17	Q07266	Q07266	Drebrin	Dbn1
25.8894	25.6466	25.4348	25.5473	NaN	NaN	25.3139	NaN				5	5	5	8.7	8.7	8.7	83.456	0.00054289	1.6398	193180000	6	Q07803	Q07803	Elongation factor G, mitochondrial	Gfm1
34.6336	33.8516	34.4951	33.7603	34.2621	32.0077	34.4766	32.0641				25	25	25	61.4	61.4	61.4	38.678	0	241.42	84055000000	355	Q07936	Q07936	Annexin A2	Anxa2
NaN	26.6171	NaN	25.9601	NaN	NaN	24.1476	NaN				2	2	2	4.9	4.9	4.9	52.73	0.00104	0.95908	70637000	4	Q07969	Q07969	Platelet glycoprotein 4	Cd36
29.1125	28.2139	29.6929	28.6521	28.0872	NaN	29.0531	29.4415				5	5	5	36.4	36.4	36.4	18.979	0	28.336	2427100000	45	Q07984	Q07984	Translocon-associated protein subunit delta	Ssr4
33.0524	33.774	33.2036	33.7872	32.891	32.871	32.9281	32.4892				20	20	20	53.6	53.6	53.6	51.588	0	147.09	33772000000	207	Q08163	Q08163	Adenylyl cyclase-associated protein 1	Cap1
31.7446	25.4612	32.1529	NaN	30.1617	25.4616	28.8869	26.4243				12	12	12	42.8	42.8	42.8	33.343	0	107.49	11044000000	60	Q08290	Q08290	Calponin-1	Cnn1
25.4713	NaN	25.7157	25.3522	NaN	NaN	25.5049	NaN				4	4	4	13.8	13.8	13.8	51.652	0.0010235	0.67117	202870000	5	Q08415	Q08415	Kynurenine--oxoglutarate transaminase 1, mitochondrial	Ccbl1
25.7186	NaN	26.3035	NaN	NaN	NaN	NaN	NaN				3	3	3	5.6	5.6	5.6	71.027	0	2.1228	220090000	5	Q08463	Q08463	Frizzled-1	Fzd1
24.2931	NaN	23.3788	NaN	NaN	NaN	22.835	NaN				2	2	2	3.7	3.7	3.7	63.885	0.001005	0.47595	44814000	2	Q08464	Q08464	Frizzled-2	Fzd2
NaN	NaN	NaN	NaN	NaN	NaN	24.2087	NaN				2	2	2	3.5	3.5	3.5	64.904	0.0033882	-0.10827	84016000	4	Q08602	Q08602	Geranylgeranyl transferase type-2 subunit alpha	Rabggta
26.8115	27.4025	26.1588	28.3252	NaN	NaN	27.539	NaN				4	4	4	15.2	15.2	15.2	33.257	0	2.4492	409930000	8	Q08849	Q08849	Syntaxin-3	Stx3
25.4047	24.6075	25.9773	NaN	NaN	NaN	NaN	NaN				5	5	5	16.6	16.6	16.6	39.75	0	12.079	195170000	7	Q08851	Q08851	Syntaxin-5	Stx5
NaN	26.0709	NaN	25.7372	NaN	NaN	NaN	NaN				8	1	1	9.4	1.3	1.3	97.913	0	2.4976	50600000	4	Q08877	Q08877	Dynamin-3	Dnm3
33.0831	33.8335	33.114	34.0238	32.7353	33.2602	33.247	32.6812				15	15	9	41.6	41.6	25.5	32.901	0	103.33	32525000000	144	Q09073	Q09073	ADP/ATP translocase 2;ADP/ATP translocase 2, N-terminally processed	Slc25a5
27.6617	NaN	NaN	NaN	NaN	NaN	27.3081	NaN				5	4	4	22.7	19.3	19.3	30.891	0	4.7812	692880000	6	Q09167	Q09167	Serine/arginine-rich splicing factor 5	Srsf5
26.7948	25.9689	27.623	25.9727	26.7786	NaN	27.1479	NaN				8	8	8	24.4	24.4	24.4	51.585	0	21.427	659920000	13	Q09325	Q09325	Alpha-1,3-mannosyl-glycoprotein 2-beta-N-acetylglucosaminyltransferase	Mgat1
NaN	NaN	25.0102	NaN	NaN	NaN	NaN	NaN				2	2	2	10.1	10.1	10.1	23.537	0	4.0134	88679000	4	Q0H8B9	Q0H8B9	C-type lectin domain family 2 member D11	Clec2d11
25.4123	26.7971	25.2671	26.9908	25.9559	NaN	25.9928	NaN				6	6	6	3.1	3.1	3.1	290.31	0	14.949	279400000	15	Q0KL00	Q0KL00	Piezo-type mechanosensitive ion channel component 1	Piezo1
24.433	NaN	NaN	NaN	NaN	NaN	NaN	NaN				2	2	2	8	8	8	35.81	0	2.5258	48188000	2	Q0VGK4	Q0VGK4	Glycerophosphodiester phosphodiesterase domain-containing protein 1	Gdpd1
29.2404	29.0074	29.9407	29.1633	29.4374	29.2314	29.004	NaN				10	10	10	28.1	28.1	28.1	60.585	0	126.14	2711600000	41	Q0ZHH6	Q0ZHH6	Atlastin-3	Atl3
25.3626	NaN	26.055	NaN	27.2325	NaN	26.5777	NaN				4	4	4	8.4	8.4	8.4	64.228	0	26.214	275500000	5	Q10473;Q6UE39	Q10473	Polypeptide N-acetylgalactosaminyltransferase 1;Polypeptide N-acetylgalactosaminyltransferase 1 soluble form	Galnt1
28.7302	NaN	28.6689	28.3302	28.1285	27.7	27.8756	NaN				11	11	11	15.1	15.1	15.1	115.28	0	16.841	1472500000	24	Q10728	Q10728	Protein phosphatase 1 regulatory subunit 12A	Ppp1r12a
27.7569	27.1243	27.7818	27.7032	26.4362	NaN	26.6239	NaN				14	14	14	15.2	15.2	15.2	127.09	0	12.198	824610000	22	Q1AAU6	Q1AAU6	Arf-GAP with SH3 domain, ANK repeat and PH domain-containing protein 1	Asap1
NaN	25.808	NaN	25.9773	25.8234	NaN	25.9826	NaN				3	3	3	22.6	22.6	22.6	22.292	0	17.567	182500000	10	Q1H5H1	Q1H5H1	Selenoprotein T	Selt
25.8237	25.8692	25.9258	26.7509	NaN	NaN	25.6909	NaN				6	6	6	13.9	13.9	13.9	59.761	0	8.7475	265650000	13	Q1HAQ0	Q1HAQ0	Lysophosphatidylcholine acyltransferase 1	Lpcat1
30.3874	29.7819	30.3813	30.84	30.0053	28.0177	29.8809	29.0712				29	29	29	25.2	25.2	25.2	163.19	0	61.518	6220700000	107	Q1JU68	Q1JU68	Eukaryotic translation initiation factor 3 subunit A	Eif3a
26.6102	27.0148	26.8748	26.0822	27.3358	NaN	26.8381	NaN				3	3	3	21.8	21.8	21.8	19.889	0	21.108	487800000	14	Q27W01	Q27W01	RNA-binding protein 8A	Rbm8a
28.1852	28.2198	28.3076	28.643	28.6095	NaN	28.357	NaN				7	7	7	46.6	46.6	46.6	17.163	0	20.13	1470500000	23	Q27W02	Q27W02	Protein mago nashi homolog	Magoh
NaN	NaN	NaN	NaN	NaN	NaN	NaN	26.2217				2	1	1	1	0.5	0.5	222.88	0.0097087	-0.80455	89454000	1	Q29RW1	Q29RW1	Myosin-4	Myh4
25.9734	26.3805	26.022	26.6037	26.3019	NaN	26.1575	NaN				6	6	6	46.2	46.2	46.2	16.881	0.00052715	1.2232	339890000	10	Q2KMM2	Q2KMM2	Trafficking protein particle complex subunit 1	Trappc1
NaN	NaN	23.2917	NaN	NaN	NaN	NaN	NaN				2	2	2	2.3	2.3	2.3	124.34	0.0057061	-0.40227	43356000	3	Q2KN99	Q2KN99	Cytospin-A	Specc1l
29.0871	28.9222	29.2101	28.5661	29.4987	NaN	29.1795	29.934				12	12	12	43.2	43.2	43.2	47.632	0	60.558	2120400000	39	Q2LAP6	Q2LAP6	Testin	Tes
30.7806	30.5986	30.4403	30.6209	30.9489	30.0168	30.4529	31.0483				35	35	31	45.7	45.7	41	109.53	0	131.65	6806100000	128	Q2PQA9;P56536	Q2PQA9	Kinesin-1 heavy chain	Kif5b
25.1451	NaN	25.6489	NaN	NaN	NaN	25.1318	NaN				4	4	4	9	9	9	74.258	0	6.1279	146730000	7	Q2PS20	Q2PS20	Junctophilin-2	Jph2
27.7019	27.5029	27.6901	27.5016	27.4044	NaN	27.7824	NaN				14	14	14	19.2	19.2	19.2	111.31	0	27.038	778780000	25	Q2TA68	Q2TA68	Dynamin-like 120 kDa protein, mitochondrial;Dynamin-like 120 kDa protein, form S1	Opa1
28.4401	28.8714	28.9651	29.1087	28.7144	NaN	28.4059	27.5639				33	33	33	7.3	7.3	7.3	573.79	0	40.445	1888000000	65	Q2TL32	Q2TL32	E3 ubiquitin-protein ligase UBR4	Ubr4
25.083	NaN	25.2366	NaN	NaN	NaN	25.3802	NaN				4	4	4	12.5	12.5	12.5	56.795	0	13.156	172140000	8	Q2YDU8	Q2YDU8	Protein spinster homolog 1	Spns1
29.3114	29.2403	28.6237	28.5213	30.1821	28.753	29.3268	28.5982				13	13	13	31.5	31.5	31.5	58.302	0	30.245	2123400000	33	Q32KJ6	Q32KJ6	N-acetylgalactosamine-6-sulfatase	Galns
28.3638	27.3328	27.8592	27.2961	NaN	NaN	27.8894	NaN				5	5	5	31.6	31.6	31.6	35.442	0	81.207	979610000	22	Q32PX2	Q32PX2	Aminoacyl tRNA synthase complex-interacting multifunctional protein 2	Aimp2
29.5821	27.8571	29.5757	27.5637	28.9162	NaN	28.6797	27.1094				16	16	15	33	33	31.9	67.196	0	43.082	2596000000	37	Q32PX7	Q32PX7	Far upstream element-binding protein 1	Fubp1
26.3278	25.3915	25.9258	26.1191	25.9742	NaN	25.8117	NaN				6	6	6	8.5	8.5	8.5	103.24	0	14.115	287290000	15	Q32PZ3	Q32PZ3	Protein unc-45 homolog A	Unc45a
28.5311	28.2602	28.3449	28.5657	27.9714	NaN	28.4283	NaN				13	13	13	39	39	39	48.556	0	30.262	1338000000	32	Q32Q06	Q32Q06	AP-1 complex subunit mu-1	Ap1m1
NaN	NaN	NaN	25.2846	23.932	NaN	24.3612	NaN				3	3	3	8.6	8.6	8.6	49.278	0.0010132	0.54202	78785000	8	Q3B7D0	Q3B7D0	Oxygen-dependent coproporphyrinogen-III oxidase, mitochondrial	Cpox
26.5863	26.8765	26.8881	27.0348	NaN	NaN	26.7862	NaN				6	6	6	21.1	21.1	21.1	38.352	0	10.207	465570000	12	Q3B7D1	Q3B7D1	Ubiquitin-conjugating enzyme E2 Z	Ube2z
24.0006	NaN	NaN	NaN	NaN	NaN	NaN	NaN				2	2	2	5.1	5.1	5.1	41.792	0.0089076	-0.64608	47770000	1	Q3B7D8	Q3B7D8	Inactive ubiquitin thioesterase FAM105A	Fam105a
27.5268	27.135	27.637	27.309	26.5148	NaN	27.3098	NaN				7	7	7	22.6	22.6	22.6	43.555	0	42.799	770730000	21	Q3B7U9	Q3B7U9	Peptidyl-prolyl cis-trans isomerase FKBP8	Fkbp8
24.6608	NaN	24.7389	NaN	NaN	NaN	NaN	NaN				3	3	3	6	6	6	67.603	0	1.942	95580000	5	Q3B8N8	Q3B8N8	Pescadillo homolog	Pes1
NaN	NaN	25.0224	NaN	NaN	NaN	NaN	NaN				3	2	1	10.7	8.3	5.2	36.988	0	2.9397	86259000	4	Q3B8Q0	Q3B8Q0	Microtubule-associated protein RP/EB family member 2	Mapre2
28.1535	27.1655	28.3095	27.2306	27.5699	NaN	27.4455	26.5284				11	11	11	16.6	16.6	16.6	85.965	0	12.768	1034700000	22	Q3B8Q1	Q3B8Q1	Nucleolar RNA helicase 2	Ddx21
30.5741	29.6707	31.0925	29.3946	30.023	27.7329	29.996	29.8212				17	17	14	41.4	41.4	38	46.84	0	41.614	6444900000	61	Q3B8Q2	Q3B8Q2	Eukaryotic initiation factor 4A-III;Eukaryotic initiation factor 4A-III, N-terminally processed	Eif4a3
NaN	NaN	25.5671	NaN	NaN	NaN	24.4123	NaN				4	4	4	7.1	7.1	7.1	87.31	0	1.861	156290000	5	Q3KR59	Q3KR59	Ubiquitin carboxyl-terminal hydrolase 10	Usp10
30.0549	30.1772	29.8522	30.1388	30.4873	29.7379	29.9933	30.4731				22	22	22	44	44	44	67.176	0	126.29	4768400000	83	Q3KR86	Q3KR86	MICOS complex subunit Mic60	Immt
26.6479	26.6388	26.9469	26.3494	25.547	NaN	26.3504	NaN				7	7	7	25.9	25.9	25.9	34.461	0	6.2887	446030000	10	Q3KRD5	Q3KRD5	Mitochondrial import receptor subunit TOM34	Tomm34
28.5426	28.4558	29.0109	27.9362	27.9207	28.7757	27.9329	NaN				6	6	6	40.8	40.8	40.8	26.571	0	27.585	1557600000	13	Q3KRD8	Q3KRD8	Eukaryotic translation initiation factor 6	Eif6
25.5681	26.5524	26.2958	26.4582	26.0314	NaN	NaN	NaN				4	4	4	6.6	6.6	6.6	66.758	0	3.2785	349120000	7	Q3KRE0	Q3KRE0	ATPase family AAA domain-containing protein 3	Atad3
NaN	NaN	NaN	NaN	NaN	NaN	26.7344	NaN				24	1	1	67	2.7	2.7	49.953	0.00053677	1.4679	527060000	7	Q3KRE8	Q3KRE8	Tubulin beta-2B chain	Tubb2b
NaN	NaN	26.5503	25.4382	NaN	NaN	26.0687	NaN				5	5	5	21.5	21.5	21.5	53.204	0	59.216	254710000	6	Q3KRF1	Q3KRF1	Sp110 nuclear body protein	Sp110
32.0509	32.9315	31.4086	32.9027	32.45	31.3303	32.384	31.8984				19	19	19	61.4	61.4	61.4	43.118	0	213.28	17987000000	234	Q3MIE4	Q3MIE4	Synaptic vesicle membrane protein VAT-1 homolog	Vat1
25.673	26.1087	26.0155	26.4657	25.7108	NaN	26.242	NaN				6	6	6	24	24	24	32.398	0	10.871	278960000	13	Q3MQ06	Q3MQ06	Autophagy protein 5	Atg5
26.3762	NaN	26.7779	26.7446	NaN	NaN	26.1404	26.8795				6	6	6	21.2	21.2	21.2	40.919	0	2.8004	338750000	12	Q3SWS8	Q3SWS8	mRNA export factor	Rae1
29.4212	28.905	29.7898	29.2126	29.3411	NaN	29.5488	28.1969				8	7	7	23.9	21.4	21.4	35.294	0	9.6299	2994500000	26	Q3SWU3	Q3SWU3	Heterogeneous nuclear ribonucleoprotein D-like	Hnrnpdl
23.678	NaN	23.511	NaN	NaN	NaN	NaN	NaN				2	2	2	2.9	2.9	2.9	86.211	0.00053305	1.4068	34990000	2	Q3T1G7	Q3T1G7	Conserved oligomeric Golgi complex subunit 7	Cog7
28.4589	25.1301	28.3901	25.3574	25.3733	NaN	26.254	NaN				8	8	8	30.7	30.7	30.7	46.294	0	36.402	1091200000	19	Q3T1I4	Q3T1I4	Protein PRRC1	Prrc1
31.209	31.3279	31.6697	31.0506	30.6842	30.355	30.7719	30.8312				10	10	10	62.3	62.3	62.3	16.832	0	204.56	10515000000	70	Q3T1J1	Q3T1J1	Eukaryotic translation initiation factor 5A-1	Eif5a
27.6258	29.3288	27.8563	29.3106	28.5863	NaN	27.9426	27.2556				3	3	3	16.7	16.7	16.7	25.079	0	5.2561	1172100000	14	Q3T1J9	Q3T1J9	MOB kinase activator 1A	Mob1a
30.9402	31.4109	30.7944	31.7166	30.8243	29.6753	30.9586	30.0129				14	14	12	74.5	74.5	65	32.967	0	126.02	7887100000	95	Q3T1K5	Q3T1K5	F-actin-capping protein subunit alpha-2	Capza2
28.0928	29.2951	27.8947	29.336	28.7161	28.8222	28.2372	29.5931				10	10	10	14.8	14.8	14.8	85.413	0	29.918	1421900000	39	Q3T1L0	Q3T1L0	Aldehyde dehydrogenase family 16 member A1	Aldh16a1
27.3853	27.3714	27.8403	27.8139	27.364	NaN	27.1969	NaN				17	17	17	20.3	20.3	20.3	152.59	0	18.214	969670000	34	Q3ZAV8	Q3ZAV8	Enhancer of mRNA-decapping protein 4	Edc4
25.4416	25.4436	25.4987	NaN	NaN	NaN	25.5469	NaN				3	3	3	6.2	6.2	6.2	82.333	0	3.0081	193360000	4	Q3ZU82	Q3ZU82	Golgin subfamily A member 5	Golga5
24.6779	25.0514	24.6061	24.8589	25.5261	NaN	24.3493	NaN				2	2	2	3.3	3.3	3.3	91.745	0	3.3717	100970000	7	Q496Z0	Q496Z0	Elongator complex protein 2	Elp2
28.2375	27.8717	28.3362	27.3709	27.4924	NaN	27.6079	NaN				7	7	7	35.5	35.5	35.5	30.701	0	76.474	1075000000	44	Q497B0	Q497B0	Omega-amidase NIT2	Nit2
27.5892	27.8761	27.4924	28.0671	27.654	NaN	27.666	26.4521				6	6	6	33.7	33.7	33.7	22.988	0	25.083	990100000	16	Q498C8	Q498C8	Protein RER1	Rer1
25.1649	NaN	24.7168	NaN	25.6569	NaN	25.7204	NaN				2	2	2	2.8	2.8	2.8	79.585	0.00053022	1.3381	102720000	3	Q498D1	Q498D1	Forkhead box protein P1	Foxp1
27.8629	28.3439	28.7209	27.947	28.2513	27.9444	27.9707	NaN				5	5	5	36.5	36.5	36.5	19.018	0	10.478	1311500000	30	Q498E0	Q498E0	Thioredoxin domain-containing protein 12	Txndc12
NaN	NaN	NaN	NaN	NaN	NaN	23.1303	NaN				2	2	2	7.8	7.8	7.8	36.588	0.0024426	0.036509	44447000	1	Q498M4	Q498M4	WD repeat-containing protein 5	Wdr5
28.306	27.126	28.2417	26.7853	28.1722	NaN	27.7259	NaN				10	10	10	17.4	17.4	17.4	90.746	0	38.457	1144200000	26	Q498R3	Q498R3	DnaJ homolog subfamily C member 10	Dnajc10
NaN	25.5238	NaN	25.471	25.0963	NaN	25.2975	NaN				3	3	3	23.1	23.1	23.1	18.094	0	1.7179	95119000	5	Q498R7	Q498R7	UPF0587 protein C1orf123 homolog
NaN	24.6959	26.0536	24.7508	NaN	NaN	NaN	NaN				4	4	4	5.6	5.6	5.6	92.462	0.00053562	1.4481	198340000	6	Q498T9	Q498T9	Volume-regulated anion channel subunit LRRC8C	Lrrc8c
NaN	NaN	26.3035	NaN	NaN	NaN	NaN	NaN				3	3	3	18.1	18.1	18.1	23.605	0.00053937	1.5565	166160000	2	Q498U4	Q498U4	SAP domain-containing ribonucleoprotein	Sarnp
27.9522	28.5218	27.2441	28.0238	27.4943	NaN	28.3106	28.9204				10	10	10	21.5	21.5	21.5	67.886	0	31.224	973840000	29	Q499N5	Q499N5	Acyl-CoA synthetase family member 2, mitochondrial	Acsf2
26.4284	26.8236	26.6374	26.2409	27.0077	NaN	26.8927	26.3329				3	3	3	16.8	16.8	16.8	33.581	0	4.8945	437560000	7	Q499N6	Q499N6	UBX domain-containing protein 1	Ubxn1
28.7129	NaN	28.519	NaN	NaN	NaN	27.6415	NaN				3	3	3	20.6	20.6	20.6	27.644	0	29.809	1125200000	9	Q499T2	Q499T2	Gamma-interferon-inducible lysosomal thiol reductase	Ifi30
25.3136	NaN	25.3603	NaN	NaN	NaN	24.8181	NaN				2	2	2	4.3	4.3	4.3	70.34	0	2.4488	143540000	3	Q4AE70	Q4AE70	Histone-arginine methyltransferase CARM1	Carm1
30.7081	29.928	31.4135	30.6155	30.246	28.5934	30.2657	27.81				24	24	22	36.5	36.5	33.2	97.613	0	171.96	7158700000	84	Q4AEF8	Q4AEF8	Coatomer subunit gamma-1	Copg1
27.7257	27.8257	27.7679	27.2457	28.5696	28.0878	27.6162	29.1072				9	9	9	36.5	36.5	36.5	38.413	0	33.871	987400000	25	Q4FZT0	Q4FZT0	Stomatin-like protein 2, mitochondrial	Stoml2
26.9901	26.3123	27.3861	26.8153	NaN	NaN	27.3043	NaN				7	7	7	21.2	21.2	21.2	42.316	0	3.2627	555300000	12	Q4FZT2	Q4FZT2	Protein phosphatase methylesterase 1	Ppme1
30.661	30.8985	30.6041	31.0988	30.9015	29.816	31.1642	31.0048				24	24	24	34.6	34.6	34.6	100.19	0	126.86	7874400000	75	Q4FZT9	Q4FZT9	26S proteasome non-ATPase regulatory subunit 2	Psmd2
25.9283	24.5669	25.8883	24.5177	24.925	NaN	24.4518	NaN				4	4	4	3.4	3.4	3.4	131.73	0.0010406	0.95993	180410000	5	Q4FZU8	Q4FZU8	Protein FAM65A	Fam65a
27.1071	27.7058	26.5252	26.6687	27.795	NaN	27.2373	NaN				5	5	5	6.1	6.1	6.1	101.22	0	2.7095	499480000	15	Q4FZV0	Q4FZV0	Beta-mannosidase	Manba
27.1195	27.6869	27.5717	28.0482	27.9429	NaN	27.399	28.1743				7	7	7	37.2	37.2	37.2	29.569	0	20.338	984040000	22	Q4FZX7	Q4FZX7	Signal recognition particle receptor subunit beta	Srprb
28.5795	30.8062	29.4004	30.9215	28.8854	28.9196	29.4122	28.0702				9	9	9	40.6	40.6	40.6	26.759	0	27.842	3162900000	53	Q4FZY0	Q4FZY0	EF-hand domain-containing protein D2	Efhd2
26.8523	27.2478	27.5045	26.9783	27.042	NaN	26.626	NaN				6	6	6	46.7	46.7	46.7	20.55	0	18.903	639670000	20	Q4G009	Q4G009	Malignant T-cell-amplified sequence 1	Mcts1
26.5386	25.2796	26.7934	24.7075	25.4657	NaN	25.628	NaN				4	4	4	2.8	2.8	2.8	166.5	0	4.0571	315870000	9	Q4G017	Q4G017	Nischarin	Nisch
NaN	24.8954	24.6378	25.376	NaN	NaN	NaN	NaN				3	3	3	9	9	9	46.213	0.00052549	1.1599	90739000	3	Q4G050	Q4G050	MAP kinase-interacting serine/threonine-protein kinase 1	Mknk1
29.8132	28.9425	29.6252	30.1604	29.3904	27.1154	29.6251	27.4502				18	18	18	28.4	28.4	28.4	90.91	0	49.742	3317200000	75	Q4G061	Q4G061	Eukaryotic translation initiation factor 3 subunit B	Eif3b
26.8191	26.3564	26.888	26.8179	27.0448	NaN	26.6991	NaN				5	5	5	19.5	19.5	19.5	38.25	0	17.914	464350000	12	Q4G063	Q4G063	Cysteine-rich with EGF-like domain protein 2	Creld2
31.4268	28.9818	31.9341	29.1753	30.6161	29.0841	30.7494	28.3456				16	16	16	47.8	47.8	47.8	42.726	0	102.9	11092000000	91	Q4G075	Q4G075	Leukocyte elastase inhibitor A	Serpinb1a
29.786	31.0345	30.0112	31.1968	29.2984	29.8978	29.9693	29.639				8	8	8	63.6	63.6	63.6	16.32	0	33.76	5039600000	46	Q4KLF8	Q4KLF8	Actin-related protein 2/3 complex subunit 5	Arpc5
28.0396	26.6937	28.3964	27.1991	NaN	NaN	27.4757	NaN				6	6	6	13	13	13	58.759	0	12.246	1353300000	9	Q4KLH4	Q4KLH4	Paraspeckle component 1	Pspc1
26.1075	25.0779	25.6203	NaN	26.1289	NaN	26.0092	NaN				4	4	4	7.5	7.5	7.5	58.169	0	2.0371	212230000	5	Q4KLH5	Q4KLH5	Arf-GAP domain and FG repeat-containing protein 1	Agfg1
27.2804	26.8415	27.1645	26.7764	26.523	NaN	26.1723	NaN				5	5	5	24.2	24.2	24.2	27.699	0	2.4734	510200000	14	Q4KLJ8	Q4KLJ8	Phosducin-like protein 3	Pdcl3
26.8244	26.9584	27.3186	NaN	25.909	NaN	27.2135	26.9063				7	7	7	29.2	29.2	29.2	33.893	0	8.6046	607710000	11	Q4KLL0;Q63799	Q4KLL0	Transcription elongation factor A protein 1	Tcea1
26.2075	26.5623	NaN	NaN	NaN	NaN	26.58	NaN				4	4	4	6.8	6.8	6.8	74.674	0	15.904	179060000	7	Q4KLL4	Q4KLL4	Transmembrane 9 superfamily member 4	Tm9sf4
NaN	NaN	NaN	NaN	NaN	NaN	28.8014	NaN				2	1	1	2.1	1	1	79.832	0.0061321	-0.50684	220200000	0	Q4KLM6	Q4KLM6	Prolyl 3-hydroxylase 2	Leprel1
NaN	NaN	25.8249	NaN	NaN	NaN	NaN	NaN				4	4	4	9.5	9.5	9.5	57.67	0	3.8673	162320000	4	Q4KLN7	Q4KLN7	ADP-ribosylation factor GTPase-activating protein 3	Arfgap3
24.9075	24.8665	25.3575	NaN	NaN	NaN	24.9094	NaN				4	4	4	10	10	10	59.443	0	6.1721	146900000	7	Q4KLZ6	Q4KLZ6	Bifunctional ATP-dependent dihydroxyacetone kinase/FAD-AMP lyase (cyclizing);ATP-dependent dihydroxyacetone kinase;FAD-AMP lyase (cyclizing)	Dak
NaN	NaN	23.3204	NaN	NaN	NaN	NaN	NaN				2	2	2	21.9	21.9	21.9	14.236	0	5.4436	17598000	1	Q4KM31	Q4KM31	LIM domain-containing protein 2	Limd2
25.3406	29.976	27.0148	31.171	25.6862	28.5645	28.2697	29.7731				7	7	7	26.6	26.6	26.6	39.995	0	12.702	1488700000	34	Q4KM33	Q4KM33	Pleckstrin	Plek
27.982	28.5851	29.1622	28.6354	28.494	27.1903	28.7703	27.9132				5	5	5	23.8	23.8	23.8	29.038	0	21.403	1827300000	29	Q4KM35	Q4KM35	Proteasome subunit beta type-10	Psmb10
28.6554	29.2841	28.9392	29.3499	29.6588	NaN	28.9846	29.7061				17	17	17	36.6	36.6	36.6	59.115	0	20.7	2387000000	42	Q4KM49	Q4KM49	Tyrosine--tRNA ligase, cytoplasmic;Tyrosine--tRNA ligase, cytoplasmic, N-terminally processed	Yars
NaN	26.2148	NaN	27.0316	27.3013	NaN	NaN	27.811				2	2	2	13.1	13.1	13.1	21.102	0	4.621	256930000	7	Q4KM64	Q4KM64	Protein jagunal homolog 1	Jagn1
27.5907	27.8216	27.7184	27.0165	26.7175	NaN	27.6252	NaN				5	5	5	26	26	26	26.24	0	6.8397	854870000	20	Q4KM65	Q4KM65	Cleavage and polyadenylation specificity factor subunit 5	Nudt21
28.3181	29.4841	28.3504	29.225	28.6595	NaN	28.64	NaN				7	7	7	34.7	34.7	34.7	22.169	0	14.795	1594200000	41	Q4KM73	Q4KM73	UMP-CMP kinase	Cmpk1
29.2982	28.7808	29.7176	28.8062	29.4236	28.099	29.3039	27.8647				7	7	7	42.8	42.8	42.8	24.74	0	48.122	2811600000	37	Q4KM74	Q4KM74	Vesicle-trafficking protein SEC22b	Sec22b
29.56	29.0956	29.6417	28.9454	28.8814	29.2614	29.2555	29.5901				8	8	8	20.5	20.5	20.5	43.496	0	13.02	3116500000	27	Q4KMA2	Q4KMA2	UV excision repair protein RAD23 homolog B	Rad23b
NaN	NaN	22.6484	NaN	NaN	NaN	NaN	NaN				6	1	1	10.3	1.2	1.2	77.009	0.0084626	-0.62344	16639000	1	Q4KMC4	Q4KMC4	Glutamine--fructose-6-phosphate aminotransferase [isomerizing] 2	Gfpt2
NaN	NaN	NaN	26.7428	27.1075	NaN	26.1822	NaN				4	4	4	15.2	15.2	15.2	33.679	0	4.3467	277060000	8	Q4QQR9	Q4QQR9	Protein MEMO1	Memo1
NaN	31.627	32.0275	NaN	NaN	NaN	NaN	NaN				4	4	4	6.9	6.9	6.9	74.881	0	3.7352	3020500000	4	Q4QQS8	Q4QQS8	Nuclear pore complex protein Nup85	Nup85
26.7057	NaN	26.9116	26.2073	NaN	NaN	26.5361	NaN				5	5	5	12.3	12.3	12.3	52.205	0	8.1714	438550000	11	Q4QQT3	Q4QQT3	CUGBP Elav-like family member 1	Celf1
28.0514	28.041	27.6699	28.5009	NaN	NaN	26.9122	NaN				8	8	8	18.5	18.5	18.5	66.006	0	70.823	1071800000	19	Q4QQT4	Q4QQT4	Serine/threonine-protein phosphatase 2A 65 kDa regulatory subunit A beta isoform	Ppp2r1b
27.68	28.7751	28.2671	29.0184	26.7558	NaN	28.5567	NaN				5	5	5	26.5	26.5	26.5	17.827	0	11.123	1187500000	15	Q4QQV3	Q4QQV3	Protein FAM162A	Fam162a
26.2786	NaN	26.4019	26.0965	NaN	NaN	26.125	NaN				2	2	2	16.9	16.9	16.9	24.575	0	9.7029	331380000	13	Q4QQV8	Q4QQV8	Charged multivesicular body protein 5	Chmp5
28.978	29.4692	29.2622	29.7203	29.5531	28.7983	29.3677	NaN				8	8	8	22.6	22.6	22.6	55.092	0	46.69	2464000000	29	Q4QQW4;Q6P6W3	Q4QQW4	Histone deacetylase 1	Hdac1
28.2935	26.8509	27.5339	25.9095	26.2473	NaN	27.5792	NaN				6	6	6	14	14	14	65.455	0	17.635	783820000	19	Q4QQW8	Q4QQW8	Putative phospholipase B-like 2	Plbd2
NaN	NaN	25.1098	NaN	NaN	NaN	NaN	NaN				2	2	2	4.8	4.8	4.8	48.881	0.00052882	1.2849	87791000	4	Q4QR75	Q4QR75	Exosome complex component RRP45	Exosc9
25.4527	25.0722	25.9307	NaN	NaN	NaN	24.8225	NaN				3	3	3	14.9	14.9	14.9	37.075	0	19.852	191350000	7	Q4QR85	Q4QR85	Methylosome protein 50	Wdr77
28.1788	27.0558	28.8953	26.3058	27.9415	NaN	27.3398	NaN				22	9	8	60.7	34.9	32.9	50.418	0	56.222	1559600000	23	Q4QRB4	Q4QRB4	Tubulin beta-3 chain	Tubb3
25.2828	NaN	25.9122	NaN	NaN	NaN	NaN	NaN				2	2	2	1.8	1.8	1.8	167.02	0	9.0621	160030000	5	Q4TU93	Q4TU93	C-type mannose receptor 2	Mrc2
25.4009	NaN	25.5215	NaN	NaN	NaN	NaN	NaN				4	4	4	17.4	17.4	17.4	33.746	0.0029197	-0.035023	180620000	4	Q4V7A0	Q4V7A0	WD repeat-containing protein 61;WD repeat-containing protein 61, N-terminally processed	Wdr61
28.7562	28.3353	28.6729	27.8888	28.8313	NaN	28.3218	NaN				15	15	15	31.6	31.6	31.6	76.757	0	64.525	1559400000	37	Q4V7C6	Q4V7C6	GMP synthase [glutamine-hydrolyzing]	Gmps
32.7375	33.1415	32.7319	33.3189	31.7696	32.0595	32.5248	32.0741				19	19	19	54.8	54.8	54.8	47.357	0	299.3	24715000000	237	Q4V7C7	Q4V7C7	Actin-related protein 3	Actr3
NaN	27.8297	NaN	NaN	NaN	NaN	NaN	NaN				2	2	1	5.9	5.9	3.2	49.772	0	5.8451	106120000	3	Q4V7E8	Q4V7E8	Leucine-rich repeat flightless-interacting protein 2	Lrrfip2
27.0459	NaN	27.1024	27.1718	27.9244	NaN	27.437	NaN				5	5	5	16	16	16	45.696	0	17.375	541740000	12	Q4V7F2	Q4V7F2	Cysteine-rich with EGF-like domain protein 1	Creld1
26.2586	26.2236	26.1465	26.0166	26.181	NaN	26.4238	NaN				2	2	2	13.6	13.6	13.6	28.024	0.00053333	1.4091	246230000	7	Q4V888	Q4V888	Type 2 phosphatidylinositol 4,5-bisphosphate 4-phosphatase	Tmem55a
NaN	NaN	NaN	NaN	NaN	NaN	NaN	NaN				5	1	1	14.9	2.1	2.1	42.257	0.0097448	-0.76812	0	1	Q4V898	Q4V898	RNA-binding motif protein, X chromosome;RNA-binding motif protein, X chromosome, N-terminally processed	Rbmx
25.9466	25.5013	26.5777	25.3475	25.4634	NaN	25.9219	NaN				3	3	3	14.9	14.9	14.9	34.809	0	3.9882	200440000	8	Q4V899	Q4V899	Transmembrane protein 165	Tmem165
NaN	NaN	23.8307	NaN	NaN	NaN	NaN	NaN				2	2	2	7.7	7.7	7.7	40.054	0.0038554	-0.20435	29242000	2	Q4V8A9	Q4V8A9	Protein O-mannose kinase	Pomk
25.888	NaN	26.0089	NaN	NaN	NaN	NaN	NaN				5	5	5	8.5	8.5	8.5	87.966	0	28.298	200840000	4	Q4V8C2	Q4V8C2	Centromere/kinetochore protein zw10 homolog	Zw10
27.5491	27.1155	27.194	NaN	NaN	NaN	27.247	NaN				4	4	4	16.3	16.3	16.3	34.355	0	10.687	621050000	6	Q4V8C7	Q4V8C7	Interferon-inducible double-stranded RNA-dependent protein kinase activator A	Prkra
23.0925	NaN	23.8905	NaN	NaN	NaN	NaN	NaN				3	3	3	6.6	6.6	6.6	60.602	0	4.4183	34706000	3	Q4V8C8	Q4V8C8	Parafibromin	Cdc73
25.0423	24.7851	NaN	24.677	NaN	NaN	25.4641	NaN				2	2	2	5.2	5.2	5.2	58.343	0	3.4185	113800000	2	Q4V8F9	Q4V8F9	Hydroxysteroid dehydrogenase-like protein 2	Hsdl2
27.3257	NaN	27.1049	NaN	25.4463	NaN	25.2189	NaN				9	8	8	18.8	17.1	17.1	61.237	0	13.209	436220000	12	Q4V8H8	Q4V8H8	EH domain-containing protein 2	Ehd2
24.7325	23.7043	26.045	NaN	NaN	NaN	24.3417	NaN				5	5	5	7	7	7	94.161	0	2.2969	138010000	4	Q4V8I7	Q4V8I7	Volume-regulated anion channel subunit LRRC8A	Lrrc8a
27.9968	NaN	30.5561	NaN	26.0048	NaN	27.625	NaN				15	15	15	42.3	42.3	42.3	52.764	0	66.831	2765000000	34	Q4V8K1	Q4V8K1	Metalloreductase STEAP4	Steap4
26.3294	NaN	25.8092	24.4194	24.7545	NaN	24.1123	NaN				5	5	5	9.6	9.6	9.6	64.947	0	5.8085	227760000	7	Q4V8K2	Q4V8K2	Beta-catenin-like protein 1	Ctnnbl1
26.5921	26.4728	26.6521	26.8114	26.5989	NaN	26.6345	NaN				3	3	3	22.8	22.8	22.8	27.622	0	2.1449	425390000	5	Q4V8K3	Q4V8K3	N-alpha-acetyltransferase 11	Naa11
26.8458	27.7671	27.3262	28.3104	27.2838	NaN	27.451	27.1406				5	5	5	12.9	12.9	12.9	46.191	0	2.2077	654350000	12	Q4V8K5	Q4V8K5	BRO1 domain-containing protein BROX	Brox
27.2031	27.2918	27.2392	26.9047	NaN	NaN	26.914	NaN				13	13	13	14.9	14.9	14.9	128.43	0	14.181	604950000	19	Q4VSI4	Q4VSI4	Ubiquitin carboxyl-terminal hydrolase 7	Usp7
27.6081	27.0787	28.2975	26.9719	27.6849	27.4077	27.6421	27.8902				11	11	11	36.4	36.4	36.4	57.719	0	75.097	993150000	24	Q505J8	Q505J8	Phenylalanine--tRNA ligase alpha subunit	Farsa
25.3432	25.5854	27.3195	26.0877	24.8532	NaN	26.9669	NaN				5	5	5	18.6	18.6	18.6	40.717	0	4.1148	360870000	8	Q505J9	Q505J9	ATPase family AAA domain-containing protein 1	Atad1
24.2084	NaN	23.6694	NaN	NaN	NaN	NaN	NaN				2	2	2	5.7	5.7	5.7	33.774	0.0029226	-0.033344	44376000	2	Q52KK3	Q52KK3	Solute carrier family 25 member 51	Slc25a51
24.2275	NaN	25.1275	NaN	NaN	NaN	NaN	NaN				4	4	4	28.1	28.1	28.1	23.229	0.0038591	-0.16834	111290000	4	Q53B90	Q53B90	Ras-related protein Rab-43	Rab43
26.4272	27.71	27.2421	27.7024	26.775	NaN	26.4871	27.6411				7	7	5	8.9	8.9	6.6	105.47	0	2.8814	434460000	9	Q53UA7	Q53UA7	Serine/threonine-protein kinase TAO3	Taok3
25.2371	25.3444	24.6547	25.3749	25.1931	NaN	25.0369	NaN				3	3	3	11.5	11.5	11.5	32.484	0.002457	0.11459	144330000	4	Q561R9	Q561R9	Beta-lactamase-like protein 2	Lactb2
26.6465	26.8687	26.2764	26.3343	26.9447	NaN	26.21	26.4201				7	7	7	25.1	25.1	25.1	40.493	0	7.9152	497840000	13	Q561S0	Q561S0	NADH dehydrogenase [ubiquinone] 1 alpha subcomplex subunit 10, mitochondrial	Ndufa10
25.2822	NaN	25.6269	NaN	NaN	NaN	25.0144	NaN				5	5	5	5.2	5.2	5.2	116.82	0.0010096	0.52133	153670000	6	Q562A2	Q562A2	Zinc finger RNA-binding protein	Zfr
26.7221	26.9999	26.6542	27.3255	26.4445	NaN	27.1093	NaN				7	7	7	25.7	25.7	25.7	32.06	0	2.6862	390200000	8	Q562B5	Q562B5	Serine/threonine-protein phosphatase PGAM5, mitochondrial	Pgam5
NaN	NaN	23.923	NaN	NaN	NaN	NaN	NaN				2	2	2	3.4	3.4	3.4	82.639	0.0010111	0.52797	52330000	1	Q562C2	Q562C2	Ribosome biogenesis protein BOP1	Bop1
26.2175	26.1949	26.0933	26.1111	25.8339	NaN	26.0596	NaN				3	3	3	26.2	26.2	26.2	19.095	0	13.056	261750000	9	Q566C7	Q566C7	Diphosphoinositol polyphosphate phosphohydrolase 1	Nudt3
30.0977	28.2598	29.6526	28.0189	27.6255	NaN	30.0313	NaN				10	10	10	26	26	26	58.701	0	23.342	2204600000	16	Q566E5	Q566E5	KDEL motif-containing protein 2	Kdelc2
25.6553	25.4765	26.1108	25.5789	NaN	NaN	25.7432	NaN				3	3	3	13.5	13.5	13.5	27.493	0	5.0892	222090000	9	Q566Q8	Q566Q8	UPF0696 protein C11orf68 homolog	Bles03
28.9828	27.8755	28.3538	28.556	28.0736	NaN	28.0749	NaN				9	9	9	23	23	23	39.941	0	5.7963	1077500000	18	Q568Z6	Q568Z6	IST1 homolog	Ist1
24.3694	24.2445	25.3676	24.1733	NaN	NaN	NaN	NaN				3	3	3	27.1	27.1	27.1	21.114	0.001007	0.50567	101620000	4	Q569B7	Q569B7	RWD domain-containing protein 4	Rwdd4
26.3606	25.1898	26.1785	25.3904	NaN	NaN	25.2133	NaN				4	4	4	14.9	14.9	14.9	42.831	0	18.137	252550000	7	Q56A18	Q56A18	SWI/SNF-related matrix-associated actin-dependent regulator of chromatin subfamily E member 1	Smarce1
26.7675	27.2541	27.0076	26.8352	26.5787	NaN	26.7662	NaN				8	8	8	12.9	12.9	12.9	91.91	0	19.372	511310000	9	Q56A27	Q56A27	Nuclear cap-binding protein subunit 1	Ncbp1
25.5869	25.4245	25.6264	NaN	NaN	NaN	23.7428	NaN				3	3	3	3.7	3.7	3.7	119.14	0	1.8828	172560000	5	Q56B11	Q56B11	Proline-, glutamic acid- and leucine-rich protein 1	Pelp1
27.3796	27.1829	27.2989	27.5754	26.5567	NaN	27.3881	NaN				7	5	5	28.3	23.5	23.5	35.067	0	19.125	634910000	16	Q5BJ92	Q5BJ92	Serine/threonine-protein phosphatase 4 catalytic subunit	Ppp4c
26.2261	26.2706	NaN	NaN	NaN	NaN	NaN	NaN				2	2	2	3.1	3.1	3.1	76.596	0	2.6094	137770000	4	Q5BJK8	Q5BJK8	Golgi integral membrane protein 4	Golim4
27.4832	28.1462	27.4917	28.5703	27.5059	NaN	28.144	28.8007				4	4	4	11.9	11.9	11.9	41.773	0	15.166	857880000	21	Q5BJM8	Q5BJM8	Zinc transporter 7	Slc30a7
24.7342	NaN	25.0276	NaN	NaN	NaN	NaN	NaN				4	4	4	21.3	21.3	21.3	32.553	0	7.9099	143780000	5	Q5BJP9	Q5BJP9	Phytanoyl-CoA dioxygenase domain-containing protein 1	Phyhd1
24.6617	NaN	25.2177	NaN	NaN	NaN	24.9161	NaN				3	3	3	11.4	11.4	11.4	48.381	0	5.3485	111750000	4	Q5BJQ6	Q5BJQ6	Cleavage stimulation factor subunit 1	Cstf1
25.8873	25.2456	25.7587	NaN	NaN	NaN	25.2074	NaN				9	9	9	9	9	9	134	0	3.1044	238380000	8	Q5BJS0	Q5BJS0	Putative ATP-dependent RNA helicase DHX30	Dhx30
27.6634	28.8067	27.6678	28.398	28.5633	28.1597	28.2007	NaN				13	13	13	22.9	22.9	22.9	72.635	0	10.25	1092400000	34	Q5BJT7	Q5BJT7	Coiled-coil domain-containing protein 93	Ccdc93
NaN	NaN	NaN	NaN	25.1158	NaN	NaN	NaN				2	2	2	11.7	11.7	11.7	25.464	0	4.3263	74425000	2	Q5BJX0	Q5BJX0	N-terminal Xaa-Pro-Lys N-methyltransferase 1;N-terminal Xaa-Pro-Lys N-methyltransferase 1, N-terminally processed	Ntmt1
26.2131	27.8893	25.8631	27.3962	27.5932	NaN	26.95	NaN				4	4	4	10.3	10.3	10.3	43.538	0.00054113	1.594	410460000	9	Q5BJY6	Q5BJY6	Putative N-acetylglucosamine-6-phosphate deacetylase	Amdhd2
26.5596	27.297	26.3226	27.6172	27.3333	NaN	27.5538	NaN				2	2	2	11.2	11.2	11.2	30.172	0	6.4874	477180000	6	Q5BK09	Q5BK09	DNA damage-regulated autophagy modulator protein 2	Dram2
26.3998	25.9861	26.3896	26.0507	NaN	NaN	26.2158	NaN				4	4	4	15.6	15.6	15.6	41.079	0	5.2931	305260000	9	Q5BK32	Q5BK32	FAS-associated factor 2	Faf2
27.4725	27.247	27.4511	26.9406	27.668	NaN	27.1656	NaN				7	7	7	24.1	24.1	24.1	42.559	0	15.712	790540000	17	Q5BK63	Q5BK63	NADH dehydrogenase [ubiquinone] 1 alpha subcomplex subunit 9, mitochondrial	Ndufa9
24.1128	25.5375	NaN	NaN	24.3516	NaN	NaN	NaN				2	2	2	15.6	15.6	15.6	19.156	0.0010352	0.86882	37469000	2	Q5BK71	Q5BK71	ADP-ribosylation factor-like protein 11	Arl11
24.7426	NaN	24.5845	NaN	NaN	NaN	24.8403	NaN				2	2	2	9.4	9.4	9.4	38.136	0.00054377	1.6613	94917000	3	Q5BK81	Q5BK81	Prostaglandin reductase 2	Ptgr2
25.9611	NaN	25.9363	NaN	25.764	NaN	25.7328	NaN				4	4	4	22	22	22	25.209	0	6.0093	196010000	10	Q5BK85	Q5BK85	Transmembrane emp24 domain-containing protein 1	Tmed1
28.5989	27.0436	29.1632	NaN	27.9155	NaN	27.8035	27.0428				10	10	10	32.2	32.2	32.2	42.36	0	38.329	1729500000	21	Q5EAJ6	Q5EAJ6	Inhibitor of nuclear factor kappa-B kinase-interacting protein	Ikbip
28.5113	28.076	28.8888	28.462	28.1709	27.0959	28.2877	27.3449				8	8	8	46.1	46.1	46.1	22.976	0	23.36	1768400000	31	Q5EB77	Q5EB77	Ras-related protein Rab-18	Rab18
26.7358	26.5914	26.2885	26.0497	27.1205	NaN	26.5078	NaN				4	4	4	18.4	18.4	18.4	34.222	0	19.54	370410000	8	Q5EB81	Q5EB81	NADH-cytochrome b5 reductase 1	Cyb5r1
28.5649	28.8025	28.8648	28.3276	28.4043	27.4261	28.2587	NaN				7	7	7	47	47	47	22.369	0	83.103	1385000000	35	Q5EGY4	Q5EGY4	Synaptobrevin homolog YKT6	Ykt6
23.6893	NaN	24.0362	NaN	NaN	NaN	NaN	NaN				2	2	2	2.8	2.8	2.8	81.495	0	1.9509	46892000	3	Q5EIC4	Q5EIC4	Interferon regulatory factor 2-binding protein-like	Irf2bpl
26.484	26.4745	26.773	28.281	25.8065	NaN	26.9162	NaN				7	7	7	10.4	10.4	10.4	111.91	0	30.495	510180000	13	Q5FVC2	Q5FVC2	Rho guanine nucleotide exchange factor 2	Arhgef2
27.4967	27.4859	26.8114	27.7933	27.4694	27.2086	27.1218	27.5879				8	8	8	13.6	13.6	13.6	87.229	0	35.145	771280000	15	Q5FVC7	Q5FVC7	Arf-GAP with coiled-coil, ANK repeat and PH domain-containing protein 2	Acap2
29.5358	31.0723	29.0758	31.6677	30.78	29.652	30.4095	28.8933				10	10	10	25	25	25	54.399	0	29.281	4408900000	57	Q5FVH2	Q5FVH2	Phospholipase D3	Pld3
24.8825	25.2905	NaN	25.2333	NaN	NaN	NaN	NaN				2	2	2	8.4	8.4	8.4	26.724	0.0061524	-0.46593	55703000	3	Q5FVI3	Q5FVI3	Leucine-rich repeat-containing protein 57	Lrrc57
30.0303	31.1804	29.776	31.5277	30.7478	30.487	30.5849	31.2251				15	15	15	45	45	45	43.9	0	39.651	5257900000	72	Q5FVI6;Q6AYE4	Q5FVI6	V-type proton ATPase subunit C 1	Atp6v1c1
NaN	NaN	NaN	26.5298	NaN	NaN	NaN	NaN				3	3	3	7.9	7.9	7.9	52.906	0	2.7703	68901000	3	Q5FVJ0	Q5FVJ0	Protein RUFY3	Rufy3
NaN	25.093	NaN	24.8133	24.9236	NaN	NaN	NaN				2	2	2	2.1	2.1	2.1	93.533	0.0056953	-0.43357	63108000	3	Q5FVK6	Q5FVK6	Coiled-coil and C2 domain-containing protein 1B	Cc2d1b
27.3378	26.4577	27.1552	NaN	NaN	NaN	26.5414	NaN				5	5	5	34.3	34.3	34.3	23.405	0	35.957	415570000	14	Q5FVL2	Q5FVL2	ER membrane protein complex subunit 8	Emc8
31.1943	30.1621	31.3872	30.2715	31.0467	29.5701	30.9216	30.6485				14	14	14	41.6	41.6	41.6	54.925	0	113.69	8952200000	97	Q5FVM4	Q5FVM4	Non-POU domain-containing octamer-binding protein	Nono
27.2645	27.6645	28.0657	28.4489	26.6182	NaN	27.9492	NaN				6	6	6	14.4	14.4	14.4	56.017	0	11.859	619000000	20	Q5FVN0	Q5FVN0	Lysophospholipid acyltransferase 5	Lpcat3
30.2138	30.2662	30.1027	30.225	29.9116	29.3473	30.0394	29.9119				8	8	8	36.8	36.8	36.8	32.418	0	95.641	3315300000	45	Q5FVQ4	Q5FVQ4	Malectin	Mlec
NaN	NaN	25.4434	NaN	NaN	NaN	24.8707	NaN				5	5	5	9.9	9.9	9.9	59.042	0	3.3157	148020000	8	Q5FVQ9	Q5FVQ9	Tubulin-specific chaperone E	Tbce
26.9522	NaN	27.6976	24.9639	NaN	NaN	26.5706	NaN				4	4	4	11.7	11.7	11.7	55.07	0	48.398	590050000	10	Q5FWT1	Q5FWT1	Protein FAM98A	Fam98a
25.1071	NaN	NaN	NaN	25.8733	NaN	NaN	NaN				4	4	4	11.6	11.6	11.6	36.866	0.0097222	-0.80036	113520000	4	Q5FWT7	Q5FWT7	Ubiquitin-like domain-containing CTD phosphatase 1	Ublcp1
26.9505	27.0801	26.9836	26.9515	26.2393	NaN	26.6602	NaN				6	6	6	26.4	26.4	26.4	37.598	0	15.362	527360000	14	Q5FWY5	Q5FWY5	AH receptor-interacting protein	Aip
26.7169	25.9946	27.1547	25.5935	26.5518	NaN	26.2324	NaN				6	6	6	31.2	31.2	31.2	35.995	0	19.837	396600000	12	Q5GFD9	Q5GFD9	Protein IMPACT	Impact
25.9029	NaN	26.1605	NaN	NaN	NaN	26.4194	NaN				2	2	2	8.2	8.2	8.2	40.657	0	3.1978	326070000	6	Q5HZE2	Q5HZE2	Transmembrane protein 120A	Tmem120a
NaN	NaN	NaN	25.2908	NaN	NaN	NaN	NaN				2	2	2	5.1	5.1	5.1	39.587	0.0043248	-0.23406	38210000	1	Q5HZE4	Q5HZE4	Methylthioribose-1-phosphate isomerase	Mri1
27.5021	26.8933	27.7885	26.6772	27.3381	NaN	26.9155	26.4684				8	8	8	26.9	26.9	26.9	41.296	0	79.386	768570000	25	Q5HZV9	Q5HZV9	Protein phosphatase 1 regulatory subunit 7	Ppp1r7
25.9385	26.2641	25.8438	26.209	25.8529	NaN	25.7283	NaN				3	3	3	10.7	10.7	10.7	56.393	0	35.847	251540000	14	Q5HZY0	Q5HZY0	UBX domain-containing protein 4	Ubxn4
29.6578	29.9071	29.4926	30.2821	29.8043	29.8539	29.8179	30.3395				7	7	7	35.9	35.9	35.9	22.41	0	20.868	3898700000	49	Q5HZY2	Q5HZY2	GTP-binding protein SAR1b	Sar1b
29.9676	30.6329	29.9093	30.5172	30.0904	30.0887	29.8306	30.6462				15	15	15	53	53	53	33.267	0	22.965	4034800000	59	Q5I0D1	Q5I0D1	Glyoxalase domain-containing protein 4	Glod4
30.5269	30.7309	30.0651	30.5572	30.8648	30.2162	30.7985	29.9229				16	16	16	45.3	45.3	45.3	54.75	0	82.481	5445100000	111	Q5I0D7	Q5I0D7	Xaa-Pro dipeptidase	Pepd
29.9704	28.7997	29.8823	28.7018	28.2683	NaN	29.6693	NaN				4	4	4	22.1	22.1	22.1	27.028	0	57.137	3367400000	39	Q5I0E7	Q5I0E7	Transmembrane emp24 domain-containing protein 9	Tmed9
29.783	29.3537	29.9214	29.0048	29.989	NaN	29.4426	29.3926				15	15	15	29.4	29.4	29.4	72.029	0	64.042	3699200000	50	Q5I0G4	Q5I0G4	Glycine--tRNA ligase	Gars
26.638	NaN	27.5363	26.246	NaN	NaN	26.3377	NaN				2	2	2	12.2	12.2	12.2	21.175	0	2.5087	429300000	13	Q5I0H4	Q5I0H4	Transmembrane and coiled-coil domains protein 1	Tmco1
NaN	NaN	NaN	NaN	NaN	NaN	24.6321	NaN				2	2	2	16.1	16.1	16.1	28.848	0	13.632	79913000	1	Q5I0J5	Q5I0J5	MIT domain-containing protein 1	Mitd1
NaN	NaN	NaN	NaN	NaN	NaN	23.8417	NaN				2	2	2	11.2	11.2	11.2	34.045	0	2.9234	55875000	2	Q5I0L4	Q5I0L4	Cytosolic Fe-S cluster assembly factor NUBP1	Nubp1
NaN	28.3115	NaN	NaN	NaN	NaN	NaN	NaN				3	3	3	11.4	11.4	11.4	31.297	0	3.2669	105640000	3	Q5I0M2	Q5I0M2	Nicotinate-nucleotide pyrophosphorylase [carboxylating]	Qprt
NaN	NaN	21.5174	NaN	NaN	NaN	NaN	NaN				2	1	1	2.5	1.3	1.3	75.593	0.001004	0.43954	10509000	1	Q5I6B8	Q5I6B8	Phosphatidylinositol 4-phosphate 5-kinase type-1 gamma	Pip5k1c
NaN	28.1823	25.7462	28.3091	26.7651	NaN	26.5315	NaN				3	3	3	11.3	11.3	11.3	40.313	0	2.1237	318310000	6	Q5KTC7	Q5KTC7	N-acylethanolamine-hydrolyzing acid amidase;N-acylethanolamine-hydrolyzing acid amidase subunit alpha;N-acylethanolamine-hydrolyzing acid amidase subunit beta	Naaa
27.2013	26.9671	27.2986	26.7193	27.9309	NaN	26.5619	NaN				5	5	5	12.7	12.7	12.7	44.895	0	43.17	637210000	15	Q5M7A4	Q5M7A4	Ubiquitin-like modifier-activating enzyme 5	Uba5
24.5617	NaN	24.4714	NaN	NaN	NaN	NaN	NaN				3	3	3	10.6	10.6	10.6	37.617	0	6.9561	107180000	8	Q5M7T1	Q5M7T1	Probable cytosolic iron-sulfur protein assembly protein CIAO1	Ciao1
25.182	NaN	24.8493	NaN	NaN	NaN	NaN	NaN				2	2	2	9.8	9.8	9.8	27.283	0	4.3437	90407000	4	Q5M7T4	Q5M7T4	Protein YIPF4	Yipf4
31.5295	32.333	31.6634	33.1674	31.5721	31.5118	31.9034	31.1195				14	14	14	45.4	45.4	45.4	44.733	0	101.49	16895000000	155	Q5M7U6	Q5M7U6	Actin-related protein 2	Actr2
26.6968	26.4737	27.4466	NaN	NaN	NaN	26.9373	NaN				4	4	4	5.9	5.9	5.9	108.25	0	6.3793	561130000	7	Q5M7V8	Q5M7V8	Thyroid hormone receptor-associated protein 3	Thrap3
28.7959	27.478	29.131	27.388	28.2632	NaN	28.6776	27.8315				16	16	16	21.4	21.4	21.4	110.3	0	19.935	1753400000	27	Q5M7W5	Q5M7W5	Microtubule-associated protein 4	Map4
24.7878	NaN	24.9844	24.3736	NaN	NaN	NaN	NaN				2	2	2	11.2	11.2	11.2	21.618	0.00053107	1.3689	95540000	4	Q5M808	Q5M808	Protein Hikeshi
25.7762	27.4151	24.6709	NaN	NaN	NaN	26.1767	NaN				2	2	2	7.6	7.6	7.6	24.967	0.002451	0.090111	194590000	4	Q5M819	Q5M819	Phosphoserine phosphatase	Psph
NaN	NaN	26.0078	NaN	NaN	NaN	NaN	NaN				2	2	2	18.5	18.5	18.5	17.674	0	7.2115	144600000	4	Q5M823	Q5M823	NudC domain-containing protein 2	Nudcd2
27.235	26.5207	28.4682	27.3762	26.8363	NaN	28.2464	NaN				5	5	4	13.9	13.9	11.3	51.503	0	6.9919	1002100000	9	Q5M824;O70143	Q5M824	SHC-transforming protein 1	Shc1
26.139	25.5674	26.3697	NaN	26.6849	NaN	26.0137	NaN				4	4	4	18.6	18.6	18.6	32.178	0	5.7284	336060000	9	Q5M827	Q5M827	Pirin	Pir
NaN	NaN	NaN	24.8053	NaN	NaN	23.7855	NaN				2	2	2	13.5	13.5	13.5	26.436	0.0047755	-0.30963	32394000	2	Q5M862	Q5M862	Coiled-coil domain-containing protein 134	Ccdc134
24.1363	27.0926	NaN	27.2233	24.677	NaN	24.2841	25.5501				5	5	5	25.3	25.3	25.3	28.161	0	3.8743	100820000	9	Q5M883	Q5M883	Chloride intracellular channel protein 2	Clic2
26.0775	26.1703	28.522	26.5547	NaN	NaN	27.3869	NaN				5	5	5	17.2	17.2	17.2	45.166	0	25.92	657090000	8	Q5M936	Q5M936	Torsin-3A	Tor3a
25.2436	26.1074	25.6497	26.5644	NaN	NaN	25.5646	NaN				6	6	6	8.8	8.8	8.8	89.125	0	3.884	233570000	9	Q5M9F8	Q5M9F8	N-terminal kinase-like protein	Scyl1
29.3613	28.6504	29.5755	28.8441	28.8853	NaN	28.9044	NaN				10	10	10	22.1	22.1	22.1	78.12	0	61.681	2519300000	27	Q5M9G3	Q5M9G3	Caprin-1	Caprin1
NaN	NaN	29.5449	27.9412	NaN	NaN	28.9078	NaN				12	12	12	32.5	32.5	32.5	59.405	0	43.401	1810600000	23	Q5MYT9	Q5MYT9	2-5-oligoadenylate synthase-like protein 2	Oasl2
NaN	25.9459	NaN	27.0961	NaN	NaN	25.486	NaN				4	4	4	6.1	6.1	6.1	84.065	0	3.8002	91395000	4	Q5MYU0	Q5MYU0	2-5-oligoadenylate synthase 2	Oas2
23.3471	23.9436	23.7902	23.9944	NaN	NaN	NaN	NaN				2	2	2	3.8	3.8	3.8	61.523	0	2.1027	51038000	5	Q5NDL0	Q5NDL0	EGF domain-specific O-linked N-acetylglucosamine transferase	Eogt
25.353	26.0043	25.428	NaN	NaN	NaN	25.5481	NaN				3	3	3	15.3	15.3	15.3	28.874	0.0056899	-0.43842	182350000	5	Q5PPH0	Q5PPH0	Enolase-phosphatase E1	Enoph1
26.6777	24.2999	26.9988	25.1472	25.1552	NaN	25.6468	NaN				4	4	4	19.5	19.5	19.5	25.498	0	7.1633	297730000	9	Q5PPI1	Q5PPI1	Serine/arginine-rich splicing factor 9	Srsf9
NaN	NaN	22.5012	NaN	NaN	NaN	NaN	NaN				2	1	1	5.2	3.2	3.2	44.852	0.0024606	0.12498	9973700	1	Q5PPJ9	Q5PPJ9	Endophilin-B2	Sh3glb2
NaN	NaN	23.9185	NaN	NaN	NaN	NaN	NaN				2	2	2	9.7	9.7	9.7	27.568	0	2.0697	36124000	2	Q5PPL2	Q5PPL2	DCN1-like protein 5	Dcun1d5
27.6665	26.7792	26.909	25.3419	26.6415	NaN	26.6649	NaN				7	7	7	26.5	26.5	26.5	40.411	0	9.623	623100000	14	Q5PPL3	Q5PPL3	Sterol-4-alpha-carboxylate 3-dehydrogenase, decarboxylating	Nsdhl
26.3474	26.715	26.7154	26.3775	25.8412	NaN	26.6626	NaN				3	3	3	14.8	14.8	14.8	29.993	0	5.4409	317400000	8	Q5PPM8	Q5PPM8	Type 1 phosphatidylinositol 4,5-bisphosphate 4-phosphatase	Tmem55b
NaN	NaN	25.2071	NaN	NaN	NaN	NaN	NaN				3	3	3	17.2	17.2	17.2	28.878	0.00053419	1.4301	87672000	1	Q5PQJ6	Q5PQJ6	Pyrroline-5-carboxylate reductase 3	Pycrl
NaN	27.1175	NaN	NaN	NaN	NaN	NaN	NaN				2	2	2	5.2	5.2	5.2	48.045	0.0070588	-0.59685	180520000	2	Q5PQJ7	Q5PQJ7	Tubulin-specific chaperone cofactor E-like protein	Tbcel
25.2641	25.2537	25.6164	NaN	NaN	NaN	24.8504	NaN				4	4	4	15.1	15.1	15.1	33.601	0.00054083	1.5916	156830000	5	Q5PQL2	Q5PQL2	Cell differentiation protein RCD1 homolog	Rqcd1
NaN	NaN	NaN	NaN	23.7445	NaN	NaN	NaN				2	2	2	5.5	5.5	5.5	55.663	0.0010433	1.0207	39334000	2	Q5PQL5	Q5PQL5	Phosphatidylserine synthase 1	Ptdss1
24.6494	24.971	24.809	25.0397	24.6785	NaN	24.6002	NaN				3	3	3	6.9	6.9	6.9	79.771	0	2.2909	125720000	3	Q5PQM0	Q5PQM0	Transmembrane protein 168	Tmem168
NaN	NaN	NaN	NaN	NaN	NaN	24.3025	NaN				6	1	1	11.5	1.9	1.9	68.963	0	2.7807	59822000	5	Q5PQM2	Q5PQM2	Kinesin light chain 4	Klc4
26.6747	NaN	26.7503	NaN	NaN	NaN	NaN	NaN				10	10	10	12.7	12.7	12.7	118.54	0	4.9728	317760000	10	Q5PQN1	Q5PQN1	Probable E3 ubiquitin-protein ligase HERC4	Herc4
NaN	25.9496	26.0607	26.1525	25.5175	NaN	26.0009	NaN				2	2	2	7.4	7.4	7.4	44.067	0	10.196	215770000	13	Q5PQP1	Q5PQP1	RNA-binding motif, single-stranded-interacting protein 1	Rbms1
23.8324	NaN	24.2567	NaN	NaN	NaN	NaN	NaN				2	2	2	4.4	4.4	4.4	69.995	0.0010493	1.1275	60470000	2	Q5PQQ2	Q5PQQ2	WW domain-binding protein 11	Wbp11
27.7374	23.381	28.6045	NaN	25.9577	NaN	26.3595	NaN				7	7	7	22.3	22.3	22.3	46.508	0	29.154	918550000	16	Q5PQV5	Q5PQV5	Trophoblast glycoprotein	Tpbg
28.2399	28.2732	28.4644	28.782	28.3421	NaN	28.7145	28.359				8	8	8	20.1	20.1	20.1	65.648	0	84.299	1573400000	37	Q5PQX1;Q6P752	Q5PQX1	Torsin-1A-interacting protein 1	Tor1aip1
31.9355	26.2425	32.0753	25.5691	30.5351	NaN	29.2929	27.0902				50	50	50	52.2	52.2	52.2	181.11	0	323.31	10008000000	149	Q5QD51	Q5QD51	A-kinase anchor protein 12	Akap12
NaN	26.1223	NaN	25.9244	26.1561	NaN	NaN	NaN				3	3	3	7.6	7.6	7.6	51.03	0.00053135	1.3756	89203000	3	Q5QJC9	Q5QJC9	BAG family molecular chaperone regulator 5	Bag5
32.9801	32.0569	32.608	32.8463	32.9475	31.6368	32.9619	33.4431				9	9	9	24.4	24.4	24.4	36.121	0	25.063	24726000000	84	Q5RJP0	Q5RJP0	Aldose reductase-related protein 1	Akr1b7
27.0993	28.2551	26.5959	28.1802	27.8711	NaN	27.1263	NaN				7	7	7	26.6	26.6	26.6	39.319	0	30.101	563800000	20	Q5RJQ4	Q5RJQ4	NAD-dependent protein deacetylase sirtuin-2	Sirt2
NaN	NaN	22.771	NaN	NaN	NaN	NaN	NaN				2	2	2	5.6	5.6	5.6	35.931	0	1.7879	12025000	1	Q5RJQ8	Q5RJQ8	Calcium homeostasis modulator protein 2	Calhm2
29.9096	30.8679	30.0936	30.88	30.3971	30.2649	30.4447	30.0515				12	12	12	38.3	38.3	38.3	40.09	0	59.083	4628800000	53	Q5RJR2	Q5RJR2	Twinfilin-1	Twf1
30.8453	30.0898	31.1841	29.7773	28.7569	28.5865	30.6687	28.7022				12	12	12	47.6	47.6	47.6	34.869	0	83.159	7532800000	69	Q5RJR8	Q5RJR8	Leucine-rich repeat-containing protein 59	Lrrc59
25.2692	NaN	NaN	NaN	NaN	NaN	NaN	NaN				3	3	3	12.3	12.3	12.3	35.342	0	2.5738	115850000	4	Q5RJY4	Q5RJY4	Dehydrogenase/reductase SDR family member 7B	Dhrs7b
28.0037	27.7688	27.7391	28.3592	NaN	NaN	28.029	NaN				4	4	4	16.2	16.2	16.2	35.651	0	11.295	962260000	13	Q5RK09	Q5RK09	Eukaryotic translation initiation factor 3 subunit G	Eif3g
NaN	NaN	NaN	NaN	26.393	NaN	NaN	NaN				2	2	2	10.1	10.1	10.1	28.884	0	21.367	127250000	5	Q5RK19	Q5RK19	Vacuolar-sorting protein SNF8	Snf8
25.6887	25.705	25.7427	25.6194	NaN	NaN	NaN	NaN				3	3	3	4.2	4.2	4.2	119.38	0	2.7579	200270000	6	Q5RK27	Q5RK27	Solute carrier family 12 member 7	Slc12a7
NaN	NaN	NaN	25.2478	NaN	NaN	NaN	NaN				2	2	2	19.3	19.3	19.3	9.5981	0.0038685	-0.12775	40071000	2	Q5RK28	Q5RK28	Normal mucosa of esophagus-specific gene 1 protein	Nmes1
27.7764	27.9101	28.1411	28.0684	27.9185	NaN	27.7481	27.6004				8	8	8	36	36	36	28.752	0	11.471	1083800000	16	Q5RK30	Q5RK30	Ribosome maturation protein SBDS	Sbds
25.448	NaN	25.1674	NaN	NaN	NaN	NaN	NaN				6	6	6	16.1	16.1	16.1	60.421	0	12.624	151930000	8	Q5RKH0	Q5RKH0	Putative oxidoreductase GLYR1	Glyr1
NaN	NaN	24.4751	NaN	NaN	NaN	NaN	NaN				2	2	2	2.6	2.6	2.6	117.01	0.0010246	0.70464	72626000	1	Q5RKH1	Q5RKH1	Serine/threonine-protein kinase PRP4 homolog	Prpf4b
24.1465	NaN	24.0155	NaN	NaN	NaN	NaN	NaN				2	2	2	4.2	4.2	4.2	75.364	0	3.0877	84941000	2	Q5RKH6	Q5RKH6	Protein OS-9	Os9
26.6869	27.1994	26.1806	26.8917	NaN	NaN	26.7868	NaN				2	2	2	7.3	7.3	7.3	41.092	0	6.3351	425860000	14	Q5RKH7	Q5RKH7	Solute carrier family 35 member F6	Slc35f6
32.8916	33.364	32.7558	33.4313	32.9104	32.9079	32.6813	33.6191				23	23	23	55.3	55.3	55.3	66.181	0	233.66	33303000000	275	Q5RKI0	Q5RKI0	WD repeat-containing protein 1	Wdr1
31.5728	30.9334	31.7849	31.1219	30.585	29.3593	31.0619	28.2015				16	13	13	43.5	37.8	37.8	46.402	0	49.19	10586000000	77	Q5RKI1	Q5RKI1	Eukaryotic initiation factor 4A-II;Eukaryotic initiation factor 4A-II, N-terminally processed	Eif4a2
28.8503	28.9416	28.4137	28.3412	28.2883	27.2437	28.2047	27.829				19	19	19	17.1	17.1	17.1	156.65	0	38.152	1702200000	51	Q5SGE0	Q5SGE0	Leucine-rich PPR motif-containing protein, mitochondrial	Lrpprc
27.4054	28.2764	27.3608	27.7283	28.2837	NaN	27.4511	27.7822				3	3	3	12.2	12.2	12.2	26.751	0.001003	0.3981	782180000	11	Q5U1X1	Q5U1X1	Oligoribonuclease, mitochondrial	Rexo2
NaN	NaN	NaN	NaN	NaN	NaN	23.4671	NaN				3	3	3	14.7	14.7	14.7	29.102	0	5.9667	55616000	2	Q5U1Y1	Q5U1Y1	Ras-related protein Rab-34	Rab34
26.6346	27.02	26.4751	27.3435	26.6168	NaN	26.6224	NaN				10	10	10	7.4	7.4	7.4	154.43	0.0010499	1.1369	444550000	12	Q5U1Z0	Q5U1Z0	Rab3 GTPase-activating protein non-catalytic subunit	Rab3gap2
26.6926	28.258	NaN	28.0843	27.622	NaN	26.8442	NaN				4	4	4	23.3	23.3	23.3	20.302	0.002445	0.055225	417430000	13	Q5U1Z2	Q5U1Z2	Trafficking protein particle complex subunit 3	Trappc3
28.5798	29.4073	28.4852	28.8492	29.4503	28.6613	28.6799	28.5991				6	6	6	42.6	42.6	42.6	18.762	0	4.5452	1586400000	39	Q5U211	Q5U211	Sorting nexin-3	Snx3
30.5071	29.4864	30.7413	29.9873	29.2115	28.7071	30.1947	28.4606				13	13	5	39.6	39.6	16.2	49.109	0	63.631	5968700000	62	Q5U216	Q5U216	ATP-dependent RNA helicase DDX39A	Ddx39a
25.5345	NaN	25.5948	NaN	NaN	NaN	NaN	NaN				2	2	2	3.2	3.2	3.2	66.155	0	2.7436	167310000	3	Q5U2M6	Q5U2M6	DDB1- and CUL4-associated factor 8	Dcaf8
27.673	27.2596	27.8331	27.162	27.6242	NaN	27.7752	NaN				9	9	9	18.1	18.1	18.1	65.673	0	14.197	877630000	18	Q5U2N0	Q5U2N0	CTP synthase 2	Ctps2
25.4697	25.1037	25.4686	NaN	NaN	NaN	25.1499	NaN				2	2	2	8.9	8.9	8.9	34.993	0.0005423	1.63	168750000	4	Q5U2Q3	Q5U2Q3	Ester hydrolase C11orf54 homolog
29.7566	29.2892	30.0828	29.5039	29.4825	NaN	29.1881	NaN				14	14	14	40.5	40.5	40.5	49.03	0	73.668	3373600000	55	Q5U2Q7	Q5U2Q7	Eukaryotic peptide chain release factor subunit 1	Etf1
25.7751	26.1748	25.5952	25.958	NaN	NaN	NaN	NaN				3	3	3	14.4	14.4	14.4	37.374	0	3.3656	227470000	3	Q5U2R0	Q5U2R0	Methionine adenosyltransferase 2 subunit beta	Mat2b
29.3561	27.9487	28.9817	27.8602	28.3115	28.4986	28.5695	28.9209				6	6	6	32.6	32.6	32.6	25.215	0	12.424	2461500000	22	Q5U2R7	Q5U2R7	LDLR chaperone MESD	Mesdc2
24.8361	NaN	25.8836	NaN	NaN	NaN	24.1172	NaN				2	2	2	11.6	11.6	11.6	33.865	0.00053648	1.4677	140870000	3	Q5U2U2	Q5U2U2	Crk-like protein	Crkl
25.9993	NaN	26.2114	25.9738	NaN	NaN	26.1696	NaN				5	5	5	15.8	15.8	15.8	52.816	0	15.575	295900000	9	Q5U2U7	Q5U2U7	mRNA cap guanine-N7 methyltransferase	Rnmt
NaN	25.9636	NaN	26.1431	23.876	NaN	NaN	NaN				2	2	2	5.3	5.3	5.3	63.027	0.0010488	1.1242	51994000	4	Q5U2V4	Q5U2V4	Phospholipase B-like 1;Phospholipase B-like 1 chain A;Phospholipase B-like 1 chain B;Phospholipase B-like 1 chain C	Plbd1
26.5219	26.8091	27.0735	27.0393	25.1894	NaN	26.7277	NaN				5	5	5	26.4	26.4	26.4	29.98	0	16.895	460750000	16	Q5U2V8	Q5U2V8	ER membrane protein complex subunit 3	Emc3
22.8449	NaN	NaN	NaN	NaN	NaN	NaN	NaN				2	2	2	3.4	3.4	3.4	88.371	0	3.8615	14205000	2	Q5U2W5	Q5U2W5	Transducin beta-like protein 3	Tbl3
26.8252	26.3108	27.0809	26.9498	NaN	NaN	27.0238	NaN				7	7	7	20.1	20.1	20.1	55.732	0	15.126	561550000	17	Q5U2X6	Q5U2X6	Coiled-coil domain-containing protein 47	Ccdc47
27.6121	NaN	27.5165	NaN	27.5585	NaN	26.2693	NaN				10	10	10	11.7	11.7	11.7	110.21	0	17.291	663600000	12	Q5U2Y1	Q5U2Y1	General transcription factor II-I	Gtf2i
29.2405	29.6784	29.3628	29.0015	28.88	28.535	29.2413	28.4912				8	8	7	32.9	32.9	30.3	43.916	0	31.677	2508100000	32	Q5U2Z3	Q5U2Z3	Nucleosome assembly protein 1-like 4	Nap1l4
23.3127	NaN	24.5359	NaN	NaN	NaN	23.7236	NaN				2	2	2	3.1	3.1	3.1	95.618	0.0010449	1.0406	60636000	2	Q5U2Z5	Q5U2Z5	Cap-specific mRNA (nucleoside-2-O-)-methyltransferase 1	Cmtr1
32.3136	32.1315	32.532	32.0086	32.1406	31.1928	32.3203	31.3998				36	36	36	43.6	43.6	43.6	117.79	0	323.31	22389000000	236	Q5U300	Q5U300	Ubiquitin-like modifier-activating enzyme 1	Uba1
26.7475	NaN	27.4744	NaN	NaN	NaN	26.5024	NaN				6	6	6	10.1	10.1	10.1	95.94	0	10.171	497780000	10	Q5U301	Q5U301	A-kinase anchor protein 2	Akap2
24.5744	NaN	25.0119	24.4129	NaN	NaN	NaN	NaN				3	3	3	4.5	4.5	4.5	97.939	0	21.793	96594000	3	Q5U308	Q5U308	Volume-regulated anion channel subunit LRRC8D	Lrrc8d
28.1352	27.1649	29.0525	26.4707	28.1526	NaN	27.2521	NaN				19	19	19	24	24	24	109.13	0	35.813	1494400000	29	Q5U312	Q5U312	Ankycorbin	Rai14
26.7433	NaN	26.4329	NaN	NaN	NaN	26.4484	NaN				3	3	3	18.9	18.9	18.9	23.025	0	8.6264	420930000	8	Q5U316	Q5U316	Ras-related protein Rab-35	Rab35
NaN	NaN	24.8752	NaN	NaN	NaN	NaN	NaN				2	2	2	6.3	6.3	6.3	60.187	0	9.2587	63877000	3	Q5U317	Q5U317	Pre-mRNA 3-end-processing factor FIP1	Fip1l1
28.4718	NaN	28.8949	26.8225	NaN	NaN	27.3638	NaN				4	4	4	44.6	44.6	44.6	15.04	0	33.467	1445800000	23	Q5U318	Q5U318	Astrocytic phosphoprotein PEA-15	Pea15
28.3554	26.4483	28.4617	27.1207	27.8662	NaN	27.7994	NaN				12	12	12	21.9	21.9	21.9	85.059	0	27.245	1187900000	29	Q5U367	Q5U367	Procollagen-lysine,2-oxoglutarate 5-dioxygenase 3	Plod3
25.3493	NaN	25.2814	NaN	NaN	NaN	NaN	NaN				5	5	5	2.8	2.8	2.8	260.19	0	2.1069	283580000	7	Q5U4E6	Q5U4E6	Golgin subfamily A member 4	Golga4
29.4719	28.8258	29.6315	28.696	29.5877	28.2961	29.2063	28.043				9	9	9	43.5	43.5	43.5	35.547	0	91.604	2828900000	37	Q5XFW8	Q5XFW8	Protein SEC13 homolog	Sec13
32.2506	30.6691	32.9392	29.9245	30.7887	27.2455	31.4099	28.844				14	14	14	75.9	75.9	75.9	22.393	0	107.23	21483000000	103	Q5XFX0;P37805	Q5XFX0	Transgelin-2	Tagln2
30.4398	29.8267	31.014	30.5599	30.2723	28.4196	30.4861	30.3045				23	23	23	38.4	38.4	38.4	80.575	0	61.667	6238500000	98	Q5XHY5;Q68FW7	Q5XHY5	Threonine--tRNA ligase, cytoplasmic	Tars
31.0743	NaN	30.7697	NaN	32.8806	NaN	NaN	NaN				2	2	2	5.5	5.5	5.5	57.159	0	3.8537	14461000000	9	Q5XHY7	Q5XHY7	Signal transducing adapter molecule 2	Stam2
28.3878	28.7867	28.5424	28.3984	28.2206	28.6666	28.0375	28.3427				16	16	16	27.9	27.9	27.9	80.46	0	38.645	1670500000	35	Q5XHZ0	Q5XHZ0	Heat shock protein 75 kDa, mitochondrial	Trap1
NaN	NaN	NaN	24.4938	NaN	NaN	NaN	NaN				2	2	2	4.9	4.9	4.9	48.433	0.0019841	0.20788	37913000	1	Q5XHZ9	Q5XHZ9	Pachytene checkpoint protein 2 homolog	Trip13
NaN	NaN	NaN	NaN	NaN	NaN	24.4359	NaN				3	3	3	6.7	6.7	6.7	64.949	0	6.2004	95644000	4	Q5XI01	Q5XI01	La-related protein 7	Larp7
30.2618	26.9919	30.6209	27.7928	29.0419	NaN	29.2407	NaN				21	21	21	52.8	52.8	52.8	68.26	0	162.67	4194900000	69	Q5XI07	Q5XI07	Lipoma-preferred partner homolog	Lpp
29.527	28.9502	29.497	NaN	28.9181	NaN	28.0628	NaN				9	9	9	38.3	38.3	38.3	41.108	0	38.545	1908200000	19	Q5XI22	Q5XI22	Acetyl-CoA acetyltransferase, cytosolic	Acat2
26.1099	26.276	26.3609	26.383	26.7278	NaN	26.1309	NaN				7	7	7	18.7	18.7	18.7	61.724	0	23.125	337710000	13	Q5XI31	Q5XI31	GPI transamidase component PIG-S	Pigs
31.7325	32.7039	31.5058	32.6095	32.3495	31.7716	31.9081	32.058				15	15	15	52.6	52.6	52.6	30.628	0	102.88	13030000000	133	Q5XI32	Q5XI32	F-actin-capping protein subunit beta	Capzb
26.9982	28.3292	26.7255	28.5797	27.5559	NaN	27.4419	26.7591				4	4	4	12	12	12	43.03	0	2.8984	695240000	13	Q5XI41	Q5XI41	Translocating chain-associated membrane protein 1	Tram1
NaN	26.174	24.632	NaN	NaN	NaN	25.2101	NaN				2	2	2	5.1	5.1	5.1	52.146	0.0010341	0.84525	124430000	3	Q5XI42	Q5XI42	Aldehyde dehydrogenase family 3 member B1	Aldh3b1
24.6067	24.7064	25.1936	25.0677	24.5114	NaN	NaN	NaN				3	3	3	11.9	11.9	11.9	38.311	0	2.588	115300000	5	Q5XI64	Q5XI64	Monoacylglycerol lipase ABHD6	Abhd6
25.2212	NaN	26.3758	NaN	NaN	NaN	NaN	NaN				2	2	2	13.7	13.7	13.7	27.324	0.0010157	0.58771	198490000	2	Q5XI72	Q5XI72	Eukaryotic translation initiation factor 4H	Eif4h
31.7636	32.5507	31.931	32.7927	31.5879	30.9504	31.6091	30.1912				9	9	9	56.9	56.9	56.9	23.407	0	189.76	19211000000	111	Q5XI73	Q5XI73	Rho GDP-dissociation inhibitor 1	Arhgdia
29.9527	30.3439	29.7701	30.4087	30.1117	28.779	30.0554	29.8767				25	25	25	34.7	34.7	34.7	116.29	0	71.4	4055800000	75	Q5XI78	Q5XI78	2-oxoglutarate dehydrogenase, mitochondrial	Ogdh
28.113	27.7569	28.4228	28.1108	28.4906	NaN	27.8914	NaN				8	8	7	15.3	15.3	13.9	63.947	0	5.0012	1268200000	15	Q5XI81	Q5XI81	Fragile X mental retardation syndrome-related protein 1	Fxr1
27.6328	28.5395	27.535	28.5435	27.7815	NaN	28.1231	NaN				12	12	12	14.3	14.3	14.3	106.15	0	9.3612	772090000	29	Q5XI83	Q5XI83	UPF0505 protein C16orf62 homolog
28.0115	27.5461	28.1576	27.39	28.6008	NaN	27.992	NaN				8	8	8	15.6	15.6	15.6	62.992	0	11.31	1051500000	19	Q5XIA1	Q5XIA1	Nicalin	Ncln
26.5129	NaN	27.0723	26.9742	NaN	NaN	26.8818	NaN				3	3	3	9.5	9.5	9.5	37.178	0	4.8566	341660000	8	Q5XIA8	Q5XIA8	Growth hormone-inducible transmembrane protein	Ghitm
NaN	NaN	NaN	NaN	NaN	NaN	30.1582	NaN				2	2	2	6	6	6	53.309	0	4.39	3596200000	2	Q5XIB2	Q5XIB2	Peptidyl-prolyl cis-trans isomerase CWC27 homolog	Cwc27
NaN	NaN	NaN	NaN	NaN	NaN	24.5714	NaN				2	2	2	6.5	6.5	6.5	52.306	0.0033964	-0.065051	86394000	2	Q5XIB4	Q5XIB4	Ufm1-specific protease 2	Ufsp2
27.8574	26.8446	27.9537	26.6794	27.8115	NaN	27.4165	NaN				6	6	6	17.6	17.6	17.6	43.021	0	6.9671	900470000	15	Q5XIC0	Q5XIC0	Enoyl-CoA delta isomerase 2, mitochondrial	Eci2
26.8115	27.0949	26.6043	NaN	NaN	NaN	26.9356	27.4901				6	6	6	18.3	18.3	18.3	46.191	0	13.125	515030000	11	Q5XIC1	Q5XIC1	Mannose-1-phosphate guanyltransferase alpha	Gmppa
NaN	27.2756	26.232	27.4565	27.0511	NaN	26.998	NaN				5	5	5	22.2	22.2	22.2	29.576	0	2.3736	269280000	7	Q5XIC4	Q5XIC4	Maspardin	Spg21
27.0738	26.6881	NaN	26.8719	27.2876	NaN	26.9021	NaN				2	2	2	8.2	8.2	8.2	27.903	0	5.8291	375970000	10	Q5XID0	Q5XID0	Protein YIPF5	Yipf5
NaN	NaN	25.1738	NaN	NaN	NaN	NaN	NaN				2	2	2	6.1	6.1	6.1	42.552	0.0097132	-0.80281	674010000	1	Q5XID7	Q5XID7	Armadillo repeat-containing X-linked protein 3	Armcx3
28.059	25.0023	28.5967	24.0822	NaN	NaN	27.3379	24.9628				4	4	4	22.9	22.9	22.9	29.418	0	43.483	910440000	19	Q5XIE0	Q5XIE0	Acidic leucine-rich nuclear phosphoprotein 32 family member E	Anp32e
NaN	NaN	NaN	NaN	NaN	NaN	23.662	NaN				2	2	2	13.8	13.8	13.8	22.42	0	5.5167	46450000	2	Q5XIE3	Q5XIE3	39S ribosomal protein L11, mitochondrial	Mrpl11
25.3056	NaN	25.3076	26.1212	25.8834	NaN	25.3705	NaN				3	3	3	21.8	21.8	21.8	30.314	0	7.4105	176040000	10	Q5XIE8	Q5XIE8	Integral membrane protein 2B;BRI2, membrane form;BRI2 intracellular domain;BRI2C, soluble form;Bri23 peptide	Itm2b
NaN	NaN	NaN	NaN	27.1022	NaN	NaN	NaN				2	2	2	14.3	14.3	14.3	19.74	0	2.2336	251960000	2	Q5XIF3	Q5XIF3	NADH dehydrogenase [ubiquinone] iron-sulfur protein 4, mitochondrial	Ndufs4
25.7193	25.148	26.0612	25.9408	NaN	NaN	25.5396	NaN				3	3	3	10.5	10.5	10.5	38.055	0	15.472	219770000	9	Q5XIF5	Q5XIF5	Sphingolipid delta(4)-desaturase DES1	Degs1
28.1468	27.287	27.8646	27.0696	27.4805	28.4813	28.1161	27.6615				20	4	4	54.2	12.1	12.1	49.924	0	25.309	790330000	16	Q5XIF6	Q5XIF6	Tubulin alpha-4A chain	Tuba4a
26.3473	26.498	27.629	27.7652	NaN	NaN	26.5632	26.116				4	4	4	12.3	12.3	12.3	38.562	0	1.7598	391990000	9	Q5XIG0	Q5XIG0	ADP-ribose pyrophosphatase, mitochondrial	Nudt9
27.4273	25.3383	26.8484	26.0784	NaN	NaN	25.5043	NaN				3	3	3	20.6	20.6	20.6	27.659	0	2.6162	332730000	8	Q5XIG4	Q5XIG4	OCIA domain-containing protein 1	Ociad1
27.7926	28.4028	27.4996	27.8282	27.294	NaN	27.6271	NaN				7	7	7	22.1	22.1	22.1	50.197	0	6.4567	741440000	14	Q5XIG6	Q5XIG6	N-acetylgalactosamine kinase	Galk2
29.4094	28.7933	29.6054	28.839	29.1392	27.5112	28.8881	28.4508				12	12	12	44	44	44	38.456	0	29.348	2885400000	39	Q5XIG8	Q5XIG8	Serine-threonine kinase receptor-associated protein	Strap
30.8366	31.0109	30.8924	30.914	31.4284	30.9734	30.8233	31.3428				13	13	13	50.8	50.8	50.8	33.312	0	95.56	7920400000	74	Q5XIH7	Q5XIH7	Prohibitin-2	Phb2
NaN	NaN	NaN	NaN	26.8192	NaN	26.9311	NaN				2	2	2	10.7	10.7	10.7	25.639	0	5.5621	97914000	4	Q5XII0	Q5XII0	Mammalian ependymin-related protein 1	Epdr1
NaN	NaN	NaN	NaN	NaN	NaN	24.0144	NaN				2	2	2	7.8	7.8	7.8	36.878	0.0010116	0.52963	54373000	2	Q5XIJ6	Q5XIJ6	BRISC and BRCA1-A complex member 1	Babam1
31.2561	30.8664	31.3647	30.4347	30.9339	29.8679	31.1307	30.7143				24	24	24	57.2	57.2	57.2	57.458	0	203.37	9268400000	101	Q5XIM9	Q5XIM9	T-complex protein 1 subunit beta	Cct2
28.2049	27.1891	27.9381	27.7777	27.2072	NaN	27.9897	NaN				10	10	10	20.4	20.4	20.4	83.059	0	21.468	1028400000	26	Q5XIN6	Q5XIN6	LETM1 and EF-hand domain-containing protein 1, mitochondrial	Letm1
26.6235	NaN	NaN	25.9121	NaN	NaN	NaN	NaN				5	5	5	13.5	13.5	13.5	43.407	0	1.8466	303730000	5	Q5XIP1	Q5XIP1	Protein pelota homolog	Pelo
NaN	27.7786	25.9973	27.0729	NaN	NaN	26.0807	NaN				3	3	3	11.6	11.6	11.6	42.608	0	1.865	284410000	6	Q5XIP6	Q5XIP6	Flap endonuclease 1	Fen1
29.5787	28.7693	29.5867	29.1142	29.792	NaN	28.8448	28.6178				15	15	15	58.2	58.2	58.2	44.774	0	133.3	3009400000	62	Q5XIP9	Q5XIP9	Transmembrane protein 43	Tmem43
25.9492	26.0448	26.2725	25.4705	25.5366	NaN	26.3539	NaN				4	4	4	10.7	10.7	10.7	61.516	0	3.4512	347280000	8	Q5XIT9	Q5XIT9	Methylcrotonoyl-CoA carboxylase beta chain, mitochondrial	Mccc2
25.7626	24.5442	27.2148	23.8549	24.9384	NaN	25.0338	NaN				4	4	4	19.9	19.9	19.9	29.854	0	67.19	330730000	6	Q5XIU5	Q5XIU5	Proteasome inhibitor PI31 subunit	Psmf1
28.2029	27.8318	28.0517	27.6989	28.074	NaN	27.9757	NaN				8	7	7	38.2	38.2	38.2	23.403	0	76.716	929040000	22	Q5XIU9	Q5XIU9	Membrane-associated progesterone receptor component 2	Pgrmc2
26.2739	27.4802	26.0967	27.3876	26.1845	NaN	26.6431	NaN				7	7	5	11.3	11.3	8.3	87.012	0	16.942	330740000	15	Q5XXR3	Q5XXR3	Rho guanine nucleotide exchange factor 6	Arhgef6
NaN	28.661	27.031	30.8214	NaN	28.7495	27.6742	31.578				10	10	10	16.1	16.1	16.1	102.31	0	44.295	1396600000	28	Q5Y4N8	Q5Y4N8	EGF-like module-containing mucin-like hormone receptor-like 1	Emr1
29.4705	29.1715	29.4181	28.633	29.6009	28.648	29.7198	29.4708				12	12	12	28.8	28.8	28.8	51.414	0	49.774	3013200000	52	Q60587	Q60587	Trifunctional enzyme subunit beta, mitochondrial;3-ketoacyl-CoA thiolase	Hadhb
25.8461	24.83	27.0007	24.938	25.4351	NaN	25.6016	NaN				4	4	4	6.7	6.7	6.7	79.411	0	3.1111	319780000	5	Q62599	Q62599	Metastasis-associated protein MTA1	Mta1
NaN	NaN	NaN	NaN	NaN	NaN	24.4811	NaN				2	1	1	1.4	0.7	0.7	133.29	0.0097177	-0.80228	114670000	1	Q62600	Q62600	Nitric oxide synthase, endothelial	Nos3
26.389	NaN	26.7909	NaN	NaN	NaN	NaN	NaN				6	6	6	30.4	30.4	30.4	35.865	0	18.581	290690000	8	Q62627	Q62627	PRKC apoptosis WT1 regulator protein	Pawr
28.9895	26.219	29.5857	NaN	28.5941	NaN	27.9549	NaN				9	9	9	39.5	39.5	39.5	34.622	0	40.455	1793300000	21	Q62632	Q62632	Follistatin-related protein 1	Fstl1
30.6225	31.9552	30.9601	32.1374	31.0822	31.0969	31.3524	31.0461				8	8	3	39.7	39.7	15.2	20.798	0	34.65	10227000000	85	Q62636	Q62636	Ras-related protein Rap-1b	Rap1b
31.5135	30.8433	31.1054	29.8102	31.5831	30.7499	30.5858	31.2364				31	31	31	35.9	35.9	35.9	133.56	0	243.4	9557500000	125	Q62638	Q62638	Golgi apparatus protein 1	Glg1
25.5879	25.6471	NaN	26.5089	24.8904	NaN	26.5993	NaN				3	3	3	19	19	19	20.479	0	4.5408	238660000	9	Q62639	Q62639	GTP-binding protein Rheb	Rheb
27.2916	26.4926	26.6458	NaN	26.5444	NaN	26.6926	NaN				5	5	5	19.9	19.9	19.9	36.171	0	32.825	477800000	13	Q62651	Q62651	Delta(3,5)-Delta(2,4)-dienoyl-CoA isomerase, mitochondrial	Ech1
29.8087	29.9573	30.42	30.1921	29.8436	NaN	29.8936	NaN				6	6	6	41.7	41.7	41.7	11.922	0	44.835	4039300000	34	Q62658	Q62658	Peptidyl-prolyl cis-trans isomerase FKBP1A	Fkbp1a
31.3631	32.1927	31.8584	32.5245	31.3489	31.5147	31.7594	32.296				37	37	37	57.5	57.5	57.5	95.797	0	232.72	14316000000	191	Q62667	Q62667	Major vault protein	Mvp
NaN	NaN	25.3107	NaN	NaN	NaN	NaN	NaN				2	2	2	0.9	0.9	0.9	308.02	0	2.9898	129100000	2	Q62671	Q62671	E3 ubiquitin-protein ligase UBR5	Ubr5
NaN	NaN	23.3994	NaN	NaN	NaN	NaN	NaN				2	2	2	2.3	2.3	2.3	130.58	0.0093721	-0.65577	26659000	1	Q62689	Q62689	Tyrosine-protein kinase JAK2	Jak2
27.0748	NaN	27.2089	NaN	NaN	NaN	27.3632	NaN				5	5	5	6	6	6	100.57	0.0005322	1.3846	509370000	7	Q62696;Q63622;P31016;Q62936	Q62696	Disks large homolog 1	Dlg1
26.9791	25.418	27.1505	NaN	26.7665	NaN	26.8316	NaN				9	8	8	28.2	25.6	25.6	54.744	0	34.529	557120000	18	Q62698	Q62698	Cytoplasmic dynein 1 light intermediate chain 2	Dync1li2
30.9056	27.7638	30.7245	27.7776	30.4148	28.6167	29.7182	28.8469				15	15	15	49.7	49.7	49.7	37.432	0	323.31	5283000000	65	Q62703	Q62703	Reticulocalbin-2	Rcn2
NaN	NaN	NaN	26.3395	24.4275	NaN	NaN	NaN				2	2	2	4.7	4.7	4.7	55.142	0.0038666	-0.13103	82281000	3	Q62720	Q62720	Zinc transporter 1	Slc30a1
25.5902	NaN	25.4319	NaN	NaN	NaN	NaN	NaN				6	6	6	14.4	14.4	14.4	57.369	0	2.7092	161060000	7	Q62724	Q62724	DNA replication licensing factor MCM6	Mcm6
29.1947	28.9671	29.4025	29.2566	28.6626	NaN	28.6963	29.3408				11	11	11	27.7	27.7	27.7	50.277	0	57.777	1842400000	36	Q62733	Q62733	Lamina-associated polypeptide 2, isoform beta	Tmpo
33.8324	NaN	32.9497	25.5217	32.4947	27.4406	32.7261	27.6324				33	33	33	46.5	46.5	46.5	60.583	0	157.04	32108000000	148	Q62736	Q62736	Non-muscle caldesmon	Cald1
26.9334	26.3091	26.307	26.3803	25.767	NaN	26.0193	NaN				2	2	2	15.3	15.3	15.3	25.888	0	36.535	363400000	14	Q62745	Q62745	CD81 antigen	Cd81
NaN	NaN	NaN	NaN	NaN	NaN	24.6141	NaN				2	1	1	1.8	0.9	0.9	104.8	0.0029254	-0.032393	50166000	2	Q62751	Q62751	Iron-responsive element-binding protein 2	Ireb2
27.2036	28.2887	26.8976	29.0582	28.282	28.4026	27.9961	28.1242				8	8	8	15.8	15.8	15.8	66.695	0	43.03	883810000	35	Q62753	Q62753	Syntaxin-binding protein 2	Stxbp2
NaN	NaN	25.7634	NaN	NaN	NaN	NaN	NaN				5	2	2	18.8	8.9	8.9	38.851	0	5.3317	163310000	6	Q62764	Q62764	Y-box-binding protein 3	Ybx3
NaN	27.636	NaN	28.6592	NaN	NaN	26.831	NaN				5	5	5	8	8	8	72.615	0	3.5804	241480000	10	Q62773;Q62674	Q62773	Sodium/nucleoside cotransporter 2	Slc28a2
27.815	27.8371	27.7975	27.9126	27.7504	NaN	27.8199	28.1461				13	13	13	14.4	14.4	14.4	117.38	0	17.283	864410000	24	Q62780	Q62780	Probable ATP-dependent RNA helicase DDX46	Ddx46
NaN	NaN	NaN	NaN	NaN	NaN	27.7133	NaN				2	2	2	2.3	2.3	2.3	105.59	0.0057279	-0.33184	979680000	3	Q62784	Q62784	Type I inositol 3,4-bisphosphate 4-phosphatase	Inpp4a
26.397	NaN	27.1697	NaN	26.8893	NaN	26.9243	NaN				5	5	5	33.7	33.7	33.7	20.605	0	19.973	487240000	7	Q62785	Q62785	28 kDa heat- and acid-stable phosphoprotein	Pdap1
36.828	34.9324	36.5713	34.9981	35.909	34.7941	35.3972	34.8661				106	106	91	50.6	50.6	42	226.34	0	323.31	347130000000	1311	Q62812;P12847	Q62812	Myosin-9	Myh9
27.0536	28.1103	26.6881	27.8938	28.5449	NaN	27.4876	NaN				12	12	12	16.5	16.5	16.5	110.55	0	13.936	618180000	22	Q62824	Q62824	Exocyst complex component 4	Exoc4
NaN	24.8341	NaN	24.6264	24.5388	NaN	24.4404	NaN				3	3	3	5	5	5	86.496	0	3.2305	60843000	6	Q62825	Q62825	Exocyst complex component 3	Exoc3
31.1582	29.9461	31.3987	29.3509	30.8274	29.6278	30.888	30.493				25	25	25	47.5	47.5	47.5	73.782	0	90.005	8646100000	98	Q62826	Q62826	Heterogeneous nuclear ribonucleoprotein M	Hnrnpm
27.6636	27.4966	27.8253	27.1801	27.4521	NaN	27.2283	NaN				8	8	8	11.6	11.6	11.6	112.87	0	27.759	864340000	17	Q62839	Q62839	Golgin subfamily A member 2	Golga2
NaN	NaN	NaN	NaN	NaN	NaN	25.9297	NaN				2	2	2	3.7	3.7	3.7	78.803	0.0019861	0.25418	57697000	2	Q62847	Q62847	Gamma-adducin	Add3
NaN	NaN	23.47	NaN	NaN	NaN	NaN	NaN				2	2	2	4.8	4.8	4.8	45.442	0	4.8705	34349000	2	Q62848	Q62848	ADP-ribosylation factor GTPase-activating protein 1	Arfgap1
27.7851	28.3788	28.3488	27.8588	27.8721	NaN	27.1954	28.1068				14	14	11	12.2	12.2	9.5	160.39	0	12.541	1115000000	23	Q62868	Q62868	Rho-associated protein kinase 2	Rock2
28.0768	28.5776	27.7494	28.2862	28.9915	NaN	28.1988	28.2728				10	10	10	23.5	23.5	23.5	71.177	0	25.552	1218000000	25	Q62871	Q62871	Cytoplasmic dynein 1 intermediate chain 2	Dync1i2
25.0357	NaN	25.2341	NaN	NaN	NaN	NaN	NaN				3	3	3	30.8	30.8	30.8	24.576	0	2.7808	104260000	3	Q62881	Q62881	Nucleolar protein 3	Nol3
NaN	NaN	25.4162	NaN	NaN	NaN	NaN	NaN				3	3	3	15.4	15.4	15.4	27.048	0.0010504	1.1462	93787000	4	Q62885	Q62885	Protein unc-119 homolog A	Unc119
30.2031	28.7523	30.4666	28.7506	30.0786	NaN	29.5557	NaN				14	14	14	37.5	37.5	37.5	57.956	0	152.15	4985500000	65	Q62902	Q62902	Protein ERGIC-53	Lman1
NaN	27.005	25.823	28.2487	26.4031	NaN	27.0235	27.1305				8	8	8	5.3	5.3	5.3	172.88	0	31.94	294610000	10	Q62910	Q62910	Synaptojanin-1	Synj1
31.0525	27.3603	31.1758	27.272	30.6803	NaN	29.7465	NaN				22	22	22	53	53	53	63.201	0	78.593	7286900000	64	Q62920	Q62920	PDZ and LIM domain protein 5	Pdlim5
30.8483	NaN	30.6724	NaN	30.3412	NaN	29.9719	NaN				22	22	22	29.5	29.5	29.5	102.39	0	125.44	5973500000	70	Q62940	Q62940	E3 ubiquitin-protein ligase NEDD4	Nedd4
30.6461	24.4598	31.0036	25.0556	29.8307	26.0355	29.8454	26.6803				17	15	15	43.7	39.5	39.5	61.967	0	96.794	5417000000	58	Q62952	Q62952	Dihydropyrimidinase-related protein 3	Dpysl3
25.3856	26.0662	25.8586	26.1272	NaN	NaN	25.51	24.9421				3	3	3	10.5	10.5	10.5	43.902	0	6.8641	225850000	11	Q62967	Q62967	Diphosphomevalonate decarboxylase	Mvd
28.8072	27.8194	28.5602	27.5498	27.1314	NaN	27.718	NaN				16	16	16	32.7	32.7	32.7	72.262	0	26.439	1394500000	24	Q62991	Q62991	Sec1 family domain-containing protein 1	Scfd1
29.9746	29.3216	30.658	29.2174	30.2264	29.1575	30.1257	29.6064				16	16	16	61.5	61.5	61.5	40.522	0	58.921	5375100000	62	Q63009	Q63009	Protein arginine N-methyltransferase 1	Prmt1
26.9068	NaN	26.0794	NaN	NaN	NaN	NaN	NaN				2	2	2	5.3	5.3	5.3	55.903	0	3.2397	303920000	6	Q63016	Q63016	Large neutral amino acids transporter small subunit 1	Slc7a5
26.4387	NaN	26.2453	25.1727	26.4095	NaN	26.9036	NaN				7	7	7	13.1	13.1	13.1	80.354	0	14.747	355530000	10	Q63028	Q63028	Alpha-adducin	Add1
27.0928	26.9152	25.2659	NaN	NaN	NaN	27.5188	NaN				3	3	3	1.9	1.9	1.9	167.12	0	2.552	364820000	5	Q63041	Q63041	Alpha-1-macroglobulin;Alpha-1-macroglobulin 45 kDa subunit	A1m
NaN	NaN	NaN	NaN	NaN	NaN	25.5387	NaN				2	2	2	4.8	4.8	4.8	57.476	0.001032	0.805	91935000	1	Q63060	Q63060	Glycerol kinase	Gk
NaN	NaN	24.0266	NaN	NaN	NaN	NaN	NaN				2	2	2	5.1	5.1	5.1	49.08	0.0010422	1.018	52215000	2	Q63065	Q63065	[Pyruvate dehydrogenase (acetyl-transferring)] kinase isozyme 1, mitochondrial	Pdk1
25.8222	NaN	26.611	NaN	NaN	NaN	25.7986	NaN				3	3	3	11.6	11.6	11.6	35.131	0	5.4306	239360000	11	Q63072	Q63072	ADP-ribosyl cyclase/cyclic ADP-ribose hydrolase 2	Bst1
32.7906	31.9776	33.1993	32.1918	32.0795	28.7068	32.4646	29.753				16	16	16	48.4	48.4	48.4	48.173	0	323.31	26962000000	153	Q63081	Q63081	Protein disulfide-isomerase A6	Pdia6
30.4903	29.1549	30.723	29.0313	30.5996	30.2805	29.9037	30.0235				20	20	20	44.2	44.2	44.2	53.506	0	75.117	6046600000	75	Q63083	Q63083	Nucleobindin-1	Nucb1
25.0669	24.7406	25.8334	24.5004	24.3774	NaN	24.6482	NaN				5	4	4	8.5	6.9	6.9	80.457	0.00053079	1.3444	178430000	6	Q63151	Q63151	Long-chain-fatty-acid--CoA ligase 3	Acsl3
27.2643	27.9493	29.468	28.2664	26.9005	NaN	29.1389	26.8032				12	12	12	34.1	34.1	34.1	58.258	0	78.067	1939600000	36	Q63184	Q63184	Interferon-induced, double-stranded RNA-activated protein kinase	Eif2ak2
25.1655	25.3705	25.6466	NaN	NaN	NaN	24.9986	NaN				2	2	2	3.6	3.6	3.6	57.809	0.0010368	0.89249	157730000	2	Q63186	Q63186	Translation initiation factor eIF-2B subunit delta	Eif2b4
28.0342	26.8796	28.6097	27.7945	28.0995	NaN	27.5618	NaN				7	7	7	36.9	36.9	36.9	29.675	0	11.656	1152000000	16	Q63190	Q63190	Emerin	Emd
25.9312	27.928	25.9955	29.5919	26.2417	NaN	27.2502	NaN				6	6	5	25.6	25.6	21.8	32.047	0	6.2943	541450000	15	Q63203	Q63203	Low affinity immunoglobulin gamma Fc region receptor II	Fcgr2
28.3036	28.2747	27.9128	28.4583	28.7531	NaN	27.928	NaN				5	5	5	48.6	48.6	48.6	16.736	0	52.796	952420000	11	Q63228	Q63228	Glia maturation factor beta	Gmfb
NaN	27.1843	26.8173	31.5123	NaN	NaN	27.4867	29.1836				5	5	5	19.8	19.8	19.8	30.644	0	2.4076	1147800000	14	Q63264	Q63264	Interleukin-1 beta	Il1b
28.8879	29.8488	28.4989	29.1415	29.1817	28.676	28.3687	29.4228				14	14	13	20.1	20.1	19.2	98.126	0	27.223	2150800000	49	Q63270	Q63270	Cytoplasmic aconitate hydratase	Aco1
NaN	NaN	NaN	NaN	NaN	NaN	NaN	NaN				3	1	1	6.2	1.7	1.7	44.635	0	6.8283	0	1	Q63279	Q63279	Keratin, type I cytoskeletal 19	Krt19
25.7412	NaN	26.0826	NaN	NaN	NaN	25.037	NaN				5	5	5	6.5	6.5	6.5	93.54	0	5.1913	220590000	4	Q63312	Q63312	Pleckstrin homology-like domain family B member 1	Phldb1
29.792	27.8773	30.3202	27.9267	28.7478	NaN	29.0274	26.8131				21	21	21	36.8	36.8	36.8	83.611	0	97.177	3673700000	63	Q63321	Q63321	Procollagen-lysine,2-oxoglutarate 5-dioxygenase 1	Plod1
30.3346	30.526	30.733	30.1615	30.3909	29.3428	30.3703	30.1859				19	19	19	55.4	55.4	55.4	48.574	0	71.348	5179100000	100	Q63347	Q63347	26S protease regulatory subunit 7	Psmc2
31.4467	29.5017	31.1996	29.7487	29.7712	27.4096	30.509	28.5457				28	28	28	35.8	35.8	35.8	119.81	0	152	7691200000	118	Q63355	Q63355	Unconventional myosin-Ic	Myo1c
30.2212	31.7978	29.791	31.8716	29.6002	31.2353	30.2615	30.9479				21	21	21	22.2	22.2	22.2	126.83	0	66.847	4001200000	90	Q63356	Q63356	Unconventional myosin-Ie	Myo1e
26.1552	26.22	26.6794	26.6308	26.3477	NaN	25.8774	NaN				9	9	9	12.1	12.1	12.1	116.09	0	9.5963	428580000	12	Q63357	Q63357	Unconventional myosin-Id	Myo1d
26.5227	27.1895	26.4382	27.7912	26.1357	NaN	27.1377	NaN				10	10	10	5.4	5.4	5.4	225.03	0	4.3978	378420000	14	Q63358;Q9Z1N3	Q63358	Unconventional myosin-IXb	Myo9b
NaN	NaN	NaN	NaN	NaN	NaN	22.9081	NaN				2	2	2	24.1	24.1	24.1	13.412	0	40.337	98344000	4	Q63362	Q63362	NADH dehydrogenase [ubiquinone] 1 alpha subcomplex subunit 5	Ndufa5
30.2711	29.2172	30.513	30.0243	27.5829	NaN	30.0417	NaN				8	8	8	41.6	41.6	41.6	31.829	0	60.051	5055900000	47	Q63377	Q63377	Sodium/potassium-transporting ATPase subunit beta-3	Atp1b3
27.5042	27.6486	27.8388	27.6176	27.9692	NaN	27.4409	NaN				3	3	3	26	26	26	14.441	0	4.2985	829970000	12	Q63396	Q63396	Activated RNA polymerase II transcriptional coactivator p15	Sub1
29.5095	28.3677	29.2193	28.3826	29.1604	27.6809	29.297	27.8723				12	4	4	36	12.6	12.6	49.035	0	22.858	2766300000	31	Q63413	Q63413	Spliceosome RNA helicase Ddx39b	Ddx39b
24.8542	NaN	NaN	NaN	NaN	NaN	25.6764	NaN				5	1	1	5.6	1.9	1.9	99.096	0	16.397	54966000	4	Q63416	Q63416	Inter-alpha-trypsin inhibitor heavy chain H3	Itih3
26.887	27.6849	26.8469	27.5144	26.0837	NaN	26.6863	NaN				7	7	7	8	8	8	104.47	0	5.7484	459280000	15	Q63433	Q63433	Serine/threonine-protein kinase N1	Pkn1
27.0833	26.1623	26.8307	27.2064	24.7926	NaN	26.8137	NaN				6	6	6	12.6	12.6	12.6	78.445	0	10.223	337290000	12	Q63448	Q63448	Peroxisomal acyl-coenzyme A oxidase 3	Acox3
27.5329	27.4339	27.4514	27.9952	25.7518	NaN	27.0225	NaN				7	7	7	22.7	22.7	22.7	41.638	0	16.993	720960000	19	Q63450	Q63450	Calcium/calmodulin-dependent protein kinase type 1	Camk1
NaN	NaN	25.5234	25.0565	NaN	NaN	24.9543	NaN				4	3	3	14.3	10.4	10.4	39.435	0	4.9749	139390000	3	Q63468	Q63468	Phosphoribosyl pyrophosphate synthase-associated protein 1	Prpsap1
26.6269	NaN	NaN	NaN	NaN	NaN	26.8061	NaN				2	2	2	14.2	14.2	14.2	23.117	0.00053277	1.4017	377000000	10	Q63481	Q63481	Ras-related protein Rab-7L1	Rab29
27.4634	27.8705	27.3792	27.9539	27.5541	27.0274	27.4948	NaN				5	5	5	19.8	19.8	19.8	36.566	0	20.642	856660000	18	Q63486;Q63487	Q63486;Q63487	Ras-related GTP-binding protein A;Ras-related GTP-binding protein B	Rraga;RragB
26.4965	27.5649	26.1752	27.6084	26.4229	NaN	26.4133	NaN				5	5	5	16.7	16.7	16.7	38.542	0	2.9327	328060000	11	Q63493	Q63493	Antigen-presenting glycoprotein CD1d	Cd1d
30.8073	29.6863	31.0291	30.1014	28.9639	NaN	29.9392	NaN				4	4	4	20.1	20.1	20.1	23.339	0	11.055	6259200000	41	Q63507	Q63507	60S ribosomal protein L14	Rpl14
31.4553	28.8638	29.797	29.455	26.0652	28.972	30.7828	28.9031				3	3	3	18.4	18.4	18.4	22.733	0	17.906	5102200000	26	Q63524	Q63524	Transmembrane emp24 domain-containing protein 2	Tmed2
28.781	29.6542	29.0056	29.632	29.4661	29.1206	28.7808	29.91				12	12	12	45.2	45.2	45.2	38.412	0	14.783	2598300000	39	Q63525	Q63525	Nuclear migration protein nudC	Nudc
NaN	NaN	NaN	25.8261	NaN	NaN	NaN	NaN				3	3	3	11.5	11.5	11.5	39.145	0	6.9866	110340000	6	Q63530	Q63530	Phosphotriesterase-related protein	Pter
30.0792	29.461	30.1428	29.5597	29.6214	28.0675	29.8267	28.2656				17	17	17	54.4	54.4	54.4	49.16	0	152.82	4185000000	74	Q63569	Q63569	26S protease regulatory subunit 6A	Psmc3
29.392	28.8778	29.4654	28.2848	28.8379	NaN	28.7612	NaN				15	15	15	51	51	51	47.408	0	127.19	2611700000	45	Q63570	Q63570	26S protease regulatory subunit 6B	Psmc4
31.3492	30.4284	31.2738	30.323	30.5061	29.7567	30.7764	29.4389				8	8	8	42.5	42.5	42.5	24.857	0	66.292	8388600000	60	Q63584	Q63584	Transmembrane emp24 domain-containing protein 10	Tmed10
33.1668	32.0753	32.8431	32.2276	32.7668	31.4588	32.296	31.8127				28	28	28	50.2	50.2	50.2	70.679	0	180.5	20897000000	173	Q63598	Q63598	Plastin-3	Pls3
31.792	32.8468	32.1766	31.9264	32.3497	32.8818	31.497	32.9529				19	14	14	50.4	39.5	39.5	29.006	0	48.811	26927000000	124	Q63610	Q63610	Tropomyosin alpha-3 chain	Tpm3
25.7051	25.7998	25.6278	NaN	25.2692	NaN	25.3794	NaN				5	5	5	7.7	7.7	7.7	67.513	0	2.4302	165990000	6	Q63615	Q63615	Vacuolar protein sorting-associated protein 33A	Vps33a
27.576	NaN	NaN	NaN	NaN	NaN	NaN	NaN				3	3	3	4.7	4.7	4.7	70.693	0.0005339	1.4255	532660000	4	Q63616	Q63616	Vacuolar protein sorting-associated protein 33B	Vps33b
31.7051	30.2433	31.9164	30.6753	30.5556	29.0122	31.159	28.8938				27	27	27	36.9	36.9	36.9	111.29	0	242.1	12006000000	111	Q63617	Q63617	Hypoxia up-regulated protein 1	Hyou1
23.9246	NaN	24.0047	NaN	NaN	NaN	NaN	NaN				3	3	3	2.9	2.9	2.9	120.63	0	27.96	50705000	3	Q63632;Q63633	Q63632	Solute carrier family 12 member 4	Slc12a4
25.392	NaN	25.1303	NaN	NaN	NaN	NaN	NaN				3	3	3	18.4	18.4	18.4	29.056	0	5.5246	110790000	2	Q63635	Q63635	Syntaxin-6	Stx6
NaN	NaN	NaN	25.5746	NaN	NaN	NaN	NaN				2	2	2	4.3	4.3	4.3	68.711	0.0024631	0.13038	190310000	1	Q63648	Q63648	Merlin	Nf2
28.7435	29.0875	31.7887	30.3636	29.2848	27.7527	32.0158	27.3541				17	17	17	30.1	30.1	30.1	67.108	0	109.57	8502900000	90	Q63663	Q63663	Interferon-induced guanylate-binding protein 2	Gbp2
NaN	NaN	25.7499	NaN	NaN	NaN	26.1187	NaN				5	5	5	17.9	17.9	17.9	48.226	0	14.375	138350000	5	Q63688	Q63688	25-hydroxycholesterol 7-alpha-hydroxylase	Cyp7b1
27.5121	25.0999	27.5225	NaN	NaN	NaN	NaN	NaN				2	2	2	12.5	12.5	12.5	21.35	0	6.1001	658840000	8	Q63690	Q63690	Apoptosis regulator BAX	Bax
23.7428	29.3172	25.6233	30.6856	25.2079	NaN	27.712	NaN				9	9	9	29.8	29.8	29.8	40.053	0	81.019	1014800000	39	Q63691	Q63691	Monocyte differentiation antigen CD14	Cd14
28.7467	28.1681	28.7326	28.8947	29.0787	NaN	28.4784	27.9418				7	7	7	25.3	25.3	25.3	44.51	0	29.047	1849400000	24	Q63692	Q63692	Hsp90 co-chaperone Cdc37;Hsp90 co-chaperone Cdc37, N-terminally processed	Cdc37
24.2465	NaN	24.5587	25.1725	NaN	NaN	24.8475	NaN				2	2	2	5.8	5.8	5.8	42.662	0	2.3678	83554000	4	Q63707	Q63707	Dihydroorotate dehydrogenase (quinone), mitochondrial	Dhodh
34.1997	35.0782	34.1007	34.9119	35.0486	34.7182	34.6823	34.8765				18	18	16	66.3	66.3	66.3	22.109	0	94.515	89821000000	260	Q63716	Q63716	Peroxiredoxin-1	Prdx1
NaN	25.0044	24.8452	NaN	NaN	NaN	NaN	NaN				3	3	3	10.6	10.6	10.6	34.273	0	4.4707	82232000	3	Q63737	Q63737	Phosducin-like protein	Pdcl
26.5799	26.8436	26.9548	26.3964	NaN	NaN	26.5472	NaN				5	5	5	23.7	23.7	23.7	33.844	0	10.4	496030000	11	Q63768	Q63768	Adapter molecule crk	Crk
31.2224	31.515	31.9696	31.2906	31.0567	30.6876	31.5032	30.674				14	14	14	51.8	51.8	51.8	28.577	0	129.19	12348000000	100	Q63797	Q63797	Proteasome activator complex subunit 1	Psme1
30.5287	31.1339	31.1639	31.6743	30.9496	30.7683	31.112	31.1979				10	10	10	49.6	49.6	49.6	26.857	0	131.87	9859400000	86	Q63798	Q63798	Proteasome activator complex subunit 2	Psme2
30.0766	NaN	29.0665	NaN	30.2857	27.4766	25.2412	NaN				32	20	20	27.4	17.9	17.9	152.49	0	125.71	1690600000	39	Q63862	Q63862	Myosin-11	Myh11
30.8868	29.5728	30.9874	30.3413	30.3743	26.6508	30.7578	27.15				16	16	15	32.9	32.9	31.4	69.032	0	91.825	7759800000	113	Q63921	Q63921	Prostaglandin G/H synthase 1	Ptgs1
NaN	NaN	21.9846	NaN	NaN	NaN	NaN	NaN				2	1	1	9.1	5.5	5.5	24.29	0.0010127	0.53848	12122000	1	Q63942	Q63942	GTP-binding protein Rab-3D	Rab3d
29.6131	30.007	29.9004	29.3765	29.9244	29.8757	29.4723	30.5568				6	6	6	25.6	25.6	25.6	33.405	0	61.173	4289400000	24	Q63945	Q63945	Protein SET	Set
26.9512	24.7458	27.6871	24.6034	25.0522	NaN	26.2929	NaN				5	5	5	21.7	21.7	21.7	35.546	0	13.057	524300000	9	Q63965	Q63965	Sideroflexin-1	Sfxn1
30.4344	28.2966	30.5748	28.4775	29.0539	27.329	30.0616	24.9815				16	16	16	42.9	42.9	42.9	58.748	0	85.879	4861300000	77	Q64057	Q64057	Alpha-aminoadipic semialdehyde dehydrogenase	Aldh7a1
27.755	27.9505	27.9017	28.4084	28.0715	NaN	27.8237	28.3328				2	2	2	2.9	2.9	2.9	77.954	0	2.4219	940790000	12	Q64060	Q64060	Probable ATP-dependent RNA helicase DDX4	Ddx4
33.0233	32.0842	33.0048	31.2705	32.1847	31.528	31.453	29.9784				8	8	7	55.6	55.6	50.3	16.975	0	45.087	31798000000	91	Q64119	Q64119	Myosin light polypeptide 6	Myl6
28.929	NaN	30.1235	NaN	30.1655	NaN	27.8693	NaN				10	5	5	52.6	29.8	29.8	19.61	0	100.33	3686100000	24	Q64122	Q64122	Myosin regulatory light polypeptide 9	Myl9
27.0381	26.6698	27.1113	26.8459	26.8776	NaN	26.9546	NaN				6	6	6	18.1	18.1	18.1	42.888	0	3.4663	532430000	8	Q641W2	Q641W2	UPF0160 protein MYG1, mitochondrial	Myg1
25.0875	25.326	NaN	NaN	NaN	NaN	NaN	NaN				2	2	2	4.6	4.6	4.6	38.656	0.0024691	0.14962	130180000	3	Q641W4	Q641W4	Replication factor C subunit 2	Rfc2
29.5755	29.0662	28.7038	28.5032	29.1641	27.9798	29.3485	27.1731				12	12	12	28.4	28.4	28.4	60.537	0	38.356	2349300000	61	Q641X3	Q641X3	Beta-hexosaminidase subunit alpha	Hexa
29.5484	29.8504	30.0215	30.0415	29.6962	28.9986	29.7102	29.8273				16	16	16	38.9	38.9	38.9	52.22	0	36.422	3659700000	55	Q641X8	Q641X8	Eukaryotic translation initiation factor 3 subunit E	Eif3e
30.4861	29.6158	30.6882	29.6925	30.7034	29.1582	30.3223	29.457				10	10	10	29	29	29	48.895	0	63.423	6254000000	70	Q641Y0	Q641Y0	Dolichyl-diphosphooligosaccharide--protein glycosyltransferase 48 kDa subunit	Ddost
27.8148	28.0546	27.5957	27.9609	28.2262	NaN	27.6362	NaN				5	5	5	9.9	9.9	9.9	52.561	0.00054466	1.6855	793230000	6	Q641Y2	Q641Y2	NADH dehydrogenase [ubiquinone] iron-sulfur protein 2, mitochondrial	Ndufs2
NaN	27.2613	NaN	27.6343	26.7427	26.33	NaN	NaN				7	7	7	12.3	12.3	12.3	77.435	0	9.3322	712310000	10	Q641Y5	Q641Y5	Ubiquitin-like modifier-activating enzyme ATG7	Atg7
29.8755	28.1094	29.785	27.9031	28.946	NaN	28.8264	NaN				21	21	21	36.8	36.8	36.8	82.496	0	108.98	3236200000	61	Q641Y8	Q641Y8	ATP-dependent RNA helicase DDX1	Ddx1
27.2665	26.519	26.8492	26.4363	27.2063	NaN	26.5512	NaN				9	9	9	17.4	17.4	17.4	67.961	0	8.2845	469710000	11	Q641Z2	Q641Z2	Tyrosine-protein phosphatase non-receptor type 9	Ptpn9
NaN	NaN	NaN	NaN	NaN	NaN	23.2096	NaN				2	1	1	4.6	2.4	2.4	42.761	0.009298	-0.74128	14495000	1	Q641Z4	Q641Z4	Cyclin-dependent kinase 9	Cdk9
29.8952	30.8036	29.8696	31.8308	28.7522	27.7155	30.2181	29.2012				23	23	14	55.6	55.6	33.7	60.602	0	121.26	4481700000	92	Q641Z6	Q641Z6	EH domain-containing protein 1	Ehd1
28.2294	28.9617	26.6996	27.8664	28.5516	27.1514	28.3638	NaN				5	5	5	17.8	17.8	17.8	49.895	0	37.568	1050100000	35	Q641Z7	Q641Z7	Acid sphingomyelinase-like phosphodiesterase 3a	Smpdl3a
26.2699	24.8195	25.9773	25.2544	NaN	NaN	25.3257	NaN				4	4	4	17.7	17.7	17.7	30.012	0	6.5647	270970000	6	Q641Z8	Q641Z8	Peflin	Pef1
29.3676	28.0166	29.0729	28.055	28.0875	NaN	28.4542	28.4731				7	7	7	22.1	22.1	22.1	36.122	0	5.2341	1999300000	29	Q64232	Q64232	Very-long-chain enoyl-CoA reductase	Tecr
25.4328	NaN	25.6541	NaN	NaN	NaN	NaN	NaN				3	3	3	12.9	12.9	12.9	34.436	0.0010299	0.78179	144850000	4	Q64244	Q64244	ADP-ribosyl cyclase/cyclic ADP-ribose hydrolase 1	Cd38
24.9006	25.0403	25.01	NaN	NaN	NaN	24.998	NaN				3	3	3	12.1	12.1	12.1	33.678	0	2.4824	117230000	5	Q64270	Q64270	Translation initiation factor eIF-2B subunit alpha	Eif2b1
29.2545	29.3626	29.4132	29.5835	29.1451	29.3626	29.1122	29.6958				15	15	10	33.4	33.4	21.9	57.96	0	68.783	2504000000	59	Q64303;Q62829	Q64303	Serine/threonine-protein kinase PAK 2;PAK-2p27;PAK-2p34	Pak2
26.2087	26.5182	26.3134	26.3624	26.1632	NaN	25.9066	NaN				5	5	5	8.9	8.9	8.9	80.205	0	3.9021	359080000	12	Q64350	Q64350	Translation initiation factor eIF-2B subunit epsilon	Eif2b5
26.5462	NaN	27.3063	25.656	NaN	NaN	26.5615	NaN				3	3	3	18.4	18.4	18.4	25.58	0	15.466	442510000	5	Q64361	Q64361	Latexin	Lxn
30.7186	29.9147	30.4934	30.309	30.4088	29.7626	30.633	28.3825				20	20	20	36.7	36.7	36.7	82.664	0	120.84	5812600000	100	Q64428	Q64428	Trifunctional enzyme subunit alpha, mitochondrial;Long-chain enoyl-CoA hydratase;Long chain 3-hydroxyacyl-CoA dehydrogenase	Hadha
29.0247	29.9323	29.3865	29.8668	30.291	29.2345	29.4266	29.6156				4	4	4	21.1	21.1	21.1	28.57	0	143.14	3345800000	40	Q64537	Q64537	Calpain small subunit 1	Capns1
NaN	NaN	NaN	NaN	NaN	NaN	25.8087	NaN				7	1	1	8.8	0.8	0.8	114	0.0047778	-0.30252	175560000	2	Q64541	Q64541	Sodium/potassium-transporting ATPase subunit alpha-4	Atp1a4
26.2469	NaN	26.3365	NaN	NaN	NaN	26.5799	NaN				4	2	2	7.9	3.7	3.7	59.662	0.0024438	0.051226	292270000	7	Q64550	Q64550	UDP-glucuronosyltransferase 1-1	Ugt1a1
27.0949	NaN	27.4448	23.901	24.5543	NaN	26.0332	NaN				4	4	4	13.1	13.1	13.1	42.735	0	4.1906	479160000	11	Q64559	Q64559	Cytosolic acyl coenzyme A thioester hydrolase	Acot7
30.1814	29.47	30.3603	29.7553	29.5948	28.0263	29.697	28.4297				34	34	34	34.3	34.3	34.3	138.29	0	137.04	3676600000	80	Q64560	Q64560	Tripeptidyl-peptidase 2	Tpp2
26.2167	NaN	25.7829	NaN	NaN	NaN	NaN	NaN				3	3	3	12.8	12.8	12.8	36.132	0	4.9939	204120000	6	Q64591	Q64591	2,4-dienoyl-CoA reductase, mitochondrial	Decr1
25.2155	NaN	24.3172	NaN	23.1519	NaN	24.2639	NaN				3	3	3	6.9	6.9	6.9	55.248	0	4.8711	101280000	5	Q64611	Q64611	Cysteine sulfinic acid decarboxylase	Csad
26.7969	26.9223	27.1527	27.2235	27.1186	NaN	26.6902	NaN				7	7	7	31.8	31.8	31.8	35.159	0	8.6279	419730000	15	Q64620	Q64620	Serine/threonine-protein phosphatase 6 catalytic subunit;Serine/threonine-protein phosphatase 6 catalytic subunit, N-terminally processed	Ppp6c
30.177	30.5356	29.9851	30.612	30.4536	28.6121	31.1914	29.0532				8	8	6	19.8	19.8	15.6	59.627	0	79.112	4949400000	48	Q64633;Q64634;Q64638;Q64637;P20720;P36511;P19488;P08542;P08541	Q64633	UDP-glucuronosyltransferase 1-7	Ugt1a7c
26.9478	26.8729	26.7657	27.0538	27.1036	NaN	26.9663	NaN				5	5	5	16.3	16.3	16.3	40.133	0	5.1256	565900000	11	Q64640	Q64640	Adenosine kinase	Adk
24.8673	NaN	NaN	NaN	NaN	NaN	NaN	NaN				4	4	4	9.9	9.9	9.9	56.706	0.0010384	0.93303	59886000	3	Q64654	Q64654	Lanosterol 14-alpha demethylase	Cyp51a1
27.04	NaN	28.388	NaN	25.7948	NaN	27.5324	26.7939				11	11	11	20.8	20.8	20.8	60.556	0	20.955	937240000	18	Q64678	Q64678	Cytochrome P450 1B1	Cyp1b1
25.6644	28.8653	25.8895	27.9643	26.5292	NaN	26.6464	27.261				5	5	5	9.2	9.2	9.2	71.528	0	4.8628	313710000	8	Q64725	Q64725	Tyrosine-protein kinase SYK	Syk
29.0803	28.8058	28.4693	28.8056	28.7825	29.3396	29.9481	28.6894				8	8	8	21.9	21.9	21.9	46.871	0	22.01	2053800000	53	Q66H12	Q66H12	Alpha-N-acetylgalactosaminidase	Naga
23.9505	NaN	24.1404	NaN	NaN	NaN	NaN	NaN				2	2	2	4.6	4.6	4.6	40.072	0.0043165	-0.26484	59630000	4	Q66H28	Q66H28	Transmembrane protein 206	Tmem206
26.5295	25.9952	26.3191	26.3935	NaN	NaN	25.7616	NaN				4	4	4	10.1	10.1	10.1	59.267	0	9.8398	291790000	8	Q66H50	Q66H50	Fatty acyl-CoA reductase 1	Far1
29.6172	29.8953	29.1603	29.9495	29.1913	27.4169	29.81	28.9364				11	11	11	40.3	40.3	40.3	35.115	0	46.793	2532100000	54	Q66H59	Q66H59	N-acetylneuraminate lyase	Npl
23.7687	NaN	23.5268	NaN	NaN	NaN	23.758	NaN				2	2	2	3.6	3.6	3.6	56.13	0.0024643	0.13282	45663000	4	Q66H63	Q66H63	Ganglioside-induced differentiation-associated-protein 2	Gdap2
NaN	25.3615	24.5528	26.7821	NaN	NaN	24.9924	NaN				5	5	5	9.8	9.8	9.8	64.093	0	6.9511	86040000	7	Q66H68	Q66H68	RNA-binding protein 47	Rbm47
NaN	NaN	NaN	25.9291	NaN	NaN	NaN	NaN				2	2	2	6.1	6.1	6.1	35.26	0	2.3179	44678000	1	Q66H71	Q66H71	Serine/threonine-protein phosphatase CPPED1	Cpped1
24.9437	NaN	24.761	NaN	NaN	NaN	NaN	NaN				4	4	4	19.6	19.6	19.6	32.921	0.0010035	0.43225	97201000	5	Q66H74	Q66H74	Golgi phosphoprotein 3-like	Golph3l
28.7266	28.2514	28.6958	27.7273	29.9839	NaN	28.9311	NaN				8	8	8	17.2	17.2	17.2	64.018	0	32.354	890910000	19	Q66H76	Q66H76	Paxillin	Pxn
30.2865	30.3133	30.6382	30.1141	29.2033	27.2789	30.0062	28.7475				17	17	17	31.7	31.7	31.7	57.199	0	41.515	5422900000	76	Q66H80	Q66H80	Coatomer subunit delta	Arcn1
28.9631	NaN	29.3101	NaN	28.611	NaN	28.4908	27.8876				9	9	9	19.1	19.1	19.1	63.126	0	15.398	2017900000	25	Q66H94	Q66H94	Peptidyl-prolyl cis-trans isomerase FKBP9	Fkbp9
NaN	NaN	24.2745	NaN	NaN	NaN	NaN	NaN				2	2	2	2.3	2.3	2.3	103.59	0.0057252	-0.33717	54028000	1	Q66HA5	Q66HA5	Coiled-coil and C2 domain-containing protein 1A	Cc2d1a
30.5338	30.9981	30.3562	31.0933	31.2696	30.4281	30.6477	30.0673				8	8	8	41.4	41.4	41.4	21.539	0	39.601	6933600000	71	Q66HA6	Q66HA6	ADP-ribosylation factor-like protein 8B	Arl8b
30.0786	29.1385	30.2773	29.3152	29.3032	NaN	29.3259	30.2204				23	22	22	36.1	34.5	34.5	96.417	0	89.549	3793600000	76	Q66HA8	Q66HA8	Heat shock protein 105 kDa	Hsph1
27.6213	27.1337	27.3454	27.4458	28.0055	26.1929	27.3083	NaN				15	15	15	22.7	22.7	22.7	93.301	0	30.93	818060000	30	Q66HC5	Q66HC5	Nuclear pore complex protein Nup93	Nup93
34.7474	33.9624	34.8924	34.4295	34.302	34.0064	34.5282	34.7909				40	40	38	50	50	48.3	92.77	0	323.31	100880000000	432	Q66HD0	Q66HD0	Endoplasmin	Hsp90b1
27.9888	27.4535	27.8318	NaN	NaN	NaN	27.5219	28.6397				7	7	7	11.1	11.1	11.1	84.199	0	18.319	816170000	9	Q66HD3	Q66HD3	Nuclear autoantigenic sperm protein	Nasp
28.2821	28.3211	28.5395	26.6894	27.6678	26.8156	27.3928	26.9875				16	16	16	28.6	28.6	28.6	79.411	0	50.828	1252700000	32	Q66HF1	Q66HF1	NADH-ubiquinone oxidoreductase 75 kDa subunit, mitochondrial	Ndufs1
25.4284	NaN	NaN	NaN	NaN	NaN	NaN	NaN				3	3	3	5.3	5.3	5.3	66.918	0.0093067	-0.73224	91904000	3	Q66HF2	Q66HF2	Transmembrane 9 superfamily member 1	Tm9sf1
NaN	NaN	NaN	NaN	NaN	NaN	NaN	NaN				2	1	1	3.3	1.6	1.6	80.018	0.0024462	0.057987	0	1	Q66HF9	Q66HF9	Leucine-rich repeat flightless-interacting protein 1	Lrrfip1
28.4166	29.8398	27.827	29.7449	28.8293	29.0641	29.2226	29.0619				8	8	8	22.6	22.6	22.6	54.927	0	28.89	1819400000	42	Q66HG3	Q66HG3	Beta-Ala-His dipeptidase	Cndp1
25.6794	26.722	25.9912	26.3416	26.7257	NaN	25.7051	NaN				3	3	3	10.8	10.8	10.8	37.892	0	4.48	225630000	12	Q66HG4	Q66HG4	Aldose 1-epimerase	Galm
28.0269	28.3671	28.3013	27.8666	28.783	27.7443	28.2033	27.393				8	8	8	16.3	16.3	16.3	75.585	0	32.541	1644600000	30	Q66HG5	Q66HG5	Transmembrane 9 superfamily member 2	Tm9sf2
24.6422	NaN	24.77	NaN	NaN	NaN	24.5327	NaN				2	2	2	4.5	4.5	4.5	65.587	0.0010325	0.82331	91108000	3	Q66HG8	Q66HG8	Protein Red	Ik
27.3196	NaN	27.5607	NaN	26.0033	NaN	27.0373	NaN				8	8	8	20.8	20.8	20.8	56.941	0.00053505	1.4455	656190000	14	Q66HL2	Q66HL2	Src substrate cortactin	Cttn
25.6876	25.5411	25.8301	25.3588	NaN	NaN	25.6442	NaN				5	5	5	7	7	7	96.003	0	7.5012	199110000	9	Q66HR0	Q66HR0	Solute carrier family 12 member 9	Slc12a9
29.9885	30.9005	30.1293	30.4676	30.4029	30.4356	29.8836	30.0753				12	12	10	41	41	38.8	30.004	0	87.209	4651300000	53	Q66HR2	Q66HR2	Microtubule-associated protein RP/EB family member 1	Mapre1
32.0619	31.5708	32.1641	31.6639	32.0252	30.6204	32.0092	31.7646				40	40	40	51.4	51.4	51.4	101.95	0	292.56	17686000000	231	Q66X93	Q66X93	Staphylococcal nuclease domain-containing protein 1	Snd1
26.4497	27.3089	25.4297	26.1728	26.8506	NaN	26.1251	NaN				3	3	3	9	9	9	47.391	0	3.3898	298970000	12	Q675A5	Q675A5	Group XV phospholipase A2	Pla2g15
28.5147	29.4604	29.6031	29.3338	30.215	29.7171	28.7971	29.9671				7	7	7	34	34	34	33.418	0	66.667	2662100000	26	Q68A21	Q68A21	Transcriptional activator protein Pur-beta	Purb
31.99	31.9792	31.5947	31.6398	32.538	32.9765	31.7864	31.9899				21	21	9	35.6	35.6	21.7	86.067	0	216.84	14183000000	180	Q68FP1	Q68FP1	Gelsolin	Gsn
NaN	NaN	NaN	NaN	NaN	NaN	24.6683	NaN				2	2	2	7.9	7.9	7.9	39.458	0	1.9652	60592000	3	Q68FP2	Q68FP2	Serum paraoxonase/lactonase 3	Pon3
31.3984	31.271	31.724	31.4841	31.6346	30.7846	31.196	31.2273				28	28	28	64.5	64.5	64.5	59.536	0	251.77	12376000000	124	Q68FQ0	Q68FQ0	T-complex protein 1 subunit epsilon	Cct5
NaN	26.8147	NaN	26.7266	NaN	NaN	NaN	NaN				4	3	3	10.7	9.1	9.1	55.118	0	1.9392	111150000	7	Q68FR2	Q68FR2	Bridging integrator 2	Bin2
32.0371	31.6736	32.3537	31.8418	31.7818	30.7154	31.7935	30.5478				18	18	18	42.1	42.1	42.1	50.06	0	126	17873000000	177	Q68FR6	Q68FR6	Elongation factor 1-gamma	Eef1g
31.0221	29.7239	31.216	29.1909	30.2754	28.2569	30.5845	29.17				15	15	15	63.7	63.7	63.7	31.33	0	125.85	8071300000	61	Q68FR9	Q68FR9	Elongation factor 1-delta	Eef1d
27.8093	28.163	28.4354	28.0094	27.8519	27.9269	27.8641	28.4023				12	12	12	39.2	39.2	39.2	46.289	0	27.638	1116900000	27	Q68FS2	Q68FS2	COP9 signalosome complex subunit 4	Cops4
29.8646	30.452	29.9736	30.383	29.9321	29.3086	30.0831	29.564				23	23	23	58	58	58	56.149	0	87.277	4625000000	86	Q68FS4	Q68FS4	Cytosol aminopeptidase	Lap3
29.3561	29.4106	29.3042	29.0422	30.0254	30.2212	29.439	30.541				10	10	10	48.6	48.6	48.6	27.687	0	65.561	3032800000	61	Q68FU3	Q68FU3	Electron transfer flavoprotein subunit beta	Etfb
NaN	NaN	25.1921	NaN	NaN	NaN	NaN	NaN				2	2	2	7.2	7.2	7.2	43.871	0	16.121	182440000	5	Q68FV6	Q68FV6	Glycosylated lysosomal membrane protein	Glmp
NaN	NaN	25.629	NaN	NaN	NaN	NaN	NaN				2	2	2	6.3	6.3	6.3	38.512	0.0065975	-0.5472	173230000	1	Q68FW4	Q68FW4	Syntaxin-18	Stx18
28.1993	27.4353	28.2193	27.8459	27.9169	NaN	27.6821	NaN				7	7	7	24.6	24.6	24.6	47.859	0	57.433	1141300000	18	Q68FW9	Q68FW9	COP9 signalosome complex subunit 3	Cops3
28.7186	27.9778	29.0236	27.9872	28.0235	NaN	27.9609	27.9139				12	12	12	42.1	42.1	42.1	42.353	0	40.464	1578600000	32	Q68FX0	Q68FX0	Isocitrate dehydrogenase [NAD] subunit beta, mitochondrial	Idh3B
25.3189	NaN	25.1104	NaN	NaN	NaN	NaN	NaN				2	2	2	6.9	6.9	6.9	46.423	0	1.8881	115110000	3	Q68FX1	Q68FX1	Mannose-6-phosphate isomerase	Mpi
29.4055	29.5497	29.3454	29.3377	29.8898	29.8823	29.4694	29.4757				11	11	11	31.5	31.5	31.5	52.848	0	53.213	3033000000	50	Q68FY0	Q68FY0	Cytochrome b-c1 complex subunit 1, mitochondrial	Uqcrc1
26.1634	25.0019	26.5812	25.4948	24.87	NaN	25.7999	NaN				4	4	4	18.2	18.2	18.2	34.801	0	16.764	294380000	11	Q68FY1	Q68FY1	Nucleoporin NUP53	Nup35
26.3066	26.2658	26.3192	26.217	NaN	NaN	26.3803	NaN				6	6	6	28.3	28.3	28.3	24.359	0	2.934	340620000	9	Q69BT7	Q69BT7	Trafficking protein particle complex subunit 4	Trappc4
NaN	25.1411	25.4153	25.1554	24.9597	NaN	24.9911	NaN				2	2	2	4.6	4.6	4.6	74.773	0	6.1039	120850000	7	Q6AXM7	Q6AXM7	HBS1-like protein	Hbs1l
28.0226	28.5602	28.2713	28.7542	28.0184	26.3492	28.2975	NaN				9	9	9	32.8	32.8	32.8	39.617	0	15.669	1435000000	41	Q6AXM8	Q6AXM8	Serum paraoxonase/arylesterase 2	Pon2
27.5913	28.4753	27.8648	28.9563	27.7108	NaN	28.138	NaN				4	4	4	18.3	18.3	18.3	26.136	0	5.2158	1093100000	22	Q6AXN3	Q6AXN3	Transmembrane emp24 domain-containing protein 5	Tmed5
NaN	NaN	NaN	NaN	NaN	NaN	24.8182	NaN				2	2	2	3.4	3.4	3.4	75.712	0.0057225	-0.347	100400000	1	Q6AXN4	Q6AXN4	Nucleoporin NDC1	Ndc1
29.0482	28.3299	29.4125	28.6353	29.574	28.5034	28.8004	29.7172				10	10	10	41	41	41	38.512	0	104.94	2248300000	41	Q6AXQ0	Q6AXQ0	SUMO-activating enzyme subunit 1;SUMO-activating enzyme subunit 1, N-terminally processed	Sae1
24.2994	NaN	NaN	NaN	NaN	NaN	NaN	NaN				3	3	3	6.1	6.1	6.1	67.176	0.0010277	0.76198	59666000	2	Q6AXQ5	Q6AXQ5	2,5-phosphodiesterase 12	Pde12
29.2892	29.5755	28.8358	28.9789	30.472	28.4172	29.7656	NaN				9	9	9	16.9	16.9	16.9	61.527	0	26.668	2440200000	52	Q6AXR4	Q6AXR4	Beta-hexosaminidase subunit beta	Hexb
27.6814	28.5048	27.7329	27.8422	25.9814	NaN	NaN	NaN				3	3	3	8.2	8.2	8.2	42.892	0	3.0411	890170000	10	Q6AXS3	Q6AXS3	Protein DEK	Dek
27.0115	NaN	28.4094	25.7744	NaN	NaN	26.9009	NaN				5	5	5	16.7	16.7	16.7	44.754	0	15.42	859960000	10	Q6AXS5	Q6AXS5	Plasminogen activator inhibitor 1 RNA-binding protein;Plasminogen activator inhibitor 1 RNA-binding protein, N-terminally processed	Serbp1
28.1526	28.1139	28.8373	29.0087	28.0797	27.9201	28.2874	27.8458				9	9	9	52	52	52	24.163	0	59.595	1627000000	37	Q6AXT5	Q6AXT5	Ras-related protein Rab-21	Rab21
27.1863	26.5188	27.2843	26.3654	NaN	NaN	27.3096	NaN				8	8	8	24.1	24.1	24.1	51.96	0	10.502	574070000	17	Q6AXV4	Q6AXV4	Sorting and assembly machinery component 50 homolog	Samm50
25.4112	NaN	25.0996	NaN	24.1668	NaN	NaN	NaN				4	4	4	19.7	19.7	19.7	25.763	0.00054348	1.6577	123890000	4	Q6AXX6	Q6AXX6	Redox-regulatory protein FAM213A	Fam213a
NaN	NaN	24.9064	NaN	NaN	NaN	25.374	NaN				3	1	1	10.4	6.3	6.3	25.808	0.00052632	1.1756	87223000	3	Q6AXY0	Q6AXY0	Glutathione S-transferase A6	Gsta6
NaN	NaN	24.6764	25.0297	NaN	NaN	NaN	NaN				2	2	2	3.7	3.7	3.7	63.931	0.0024486	0.068917	98563000	2	Q6AXY7	Q6AXY7	Pre-mRNA-splicing factor 38B	Prpf38b
31.4294	30.2499	31.5348	29.5328	31.0312	29.908	31.0275	30.7199				12	12	7	41.6	41.6	24.9	49.293	0	76.693	10434000000	88	Q6AY09	Q6AY09	Heterogeneous nuclear ribonucleoprotein H2	Hnrnph2
26.9023	30.0861	28.9333	30.3862	29.723	29.2628	29.0506	29.5173				3	3	3	12.6	12.6	12.6	31.095	0	8.7805	1771200000	19	Q6AY20	Q6AY20	Cation-dependent mannose-6-phosphate receptor	M6pr
27.5304	26.5489	27.81	26.936	27.2567	NaN	26.9204	NaN				7	7	7	30.6	30.6	30.6	33.673	0	17.822	749740000	14	Q6AY23	Q6AY23	Pyrroline-5-carboxylate reductase 2	Pycr2
28.0864	26.3912	27.8323	26.2343	28.003	NaN	26.8902	NaN				3	3	3	18.6	18.6	18.6	25.51	0	20.605	833300000	12	Q6AY25	Q6AY25	Transmembrane emp24 domain-containing protein 3	Tmed3
26.3002	26.803	26.751	26.8253	26.9387	NaN	26.8153	27.0073				5	5	5	12.1	12.1	12.1	47.088	0.0093023	-0.73862	420030000	9	Q6AY30	Q6AY30	Saccharopine dehydrogenase-like oxidoreductase	Sccpdh
NaN	NaN	NaN	26.3148	NaN	NaN	NaN	NaN				3	3	3	13.1	13.1	13.1	37.172	0	4.1443	158050000	4	Q6AY41	Q6AY41	Cell cycle control protein 50A	Tmem30a
25.495	NaN	24.2437	NaN	NaN	NaN	NaN	NaN				2	2	2	7.9	7.9	7.9	27.352	0	2.2283	112370000	5	Q6AY55	Q6AY55	Dephospho-CoA kinase domain-containing protein	Dcakd
26.9726	28.1231	27.2733	26.7734	27.7042	NaN	27.2805	NaN				5	5	5	26	26	26	24.117	0	7.9043	551840000	14	Q6AY63	Q6AY63	ADP-sugar pyrophosphatase	Nudt5
27.978	NaN	28.076	NaN	27.7591	NaN	27.2896	NaN				9	9	9	28.5	28.5	28.5	46.396	0	21.378	758860000	20	Q6AY84	Q6AY84	Secernin-1	Scrn1
28.6326	30.1414	28.7045	30.4011	29.3174	28.7495	29.417	28.3548				9	9	9	32.4	32.4	32.4	38.114	0	28.009	2165800000	49	Q6AY86	Q6AY86	Vacuolar protein sorting-associated protein 26A	Vps26a
NaN	NaN	NaN	NaN	NaN	NaN	NaN	NaN				2	2	2	10.6	10.6	10.6	37.422	0	7.2919	0	1	Q6AY87	Q6AY87	THO complex subunit 6 homolog	Thoc6
NaN	NaN	NaN	NaN	NaN	NaN	22.6013	NaN				2	2	2	5.9	5.9	5.9	57.181	0	4.7213	34191000	1	Q6AY96	Q6AY96	General transcription factor IIF subunit 1	Gtf2f1
26.8185	26.5427	27.0124	26.5853	26.7621	NaN	26.3	NaN				4	4	4	24.8	24.8	24.8	23.01	0	2.7095	470200000	12	Q6AYA1	Q6AYA1	H/ACA ribonucleoprotein complex subunit 1	Gar1
27.083	27.1604	27.9562	27.8853	26.8874	NaN	26.8523	NaN				6	6	6	30.5	30.5	30.5	20.894	0	19.824	746010000	21	Q6AYA6	Q6AYA6	Uncharacterized protein C17orf62 homolog
24.7765	NaN	24.6013	NaN	NaN	NaN	24.087	NaN				4	4	4	10.2	10.2	10.2	54.462	0	4.4882	89618000	5	Q6AYB4	Q6AYB4	Heat shock 70 kDa protein 14	Hspa14
28.1786	27.6885	28.1546	27.7402	27.3061	27.2643	27.6657	NaN				11	11	11	28.4	28.4	28.4	55.704	0	25.261	1167500000	26	Q6AYB5	Q6AYB5	Signal recognition particle 54 kDa protein	Srp54
26.7265	28.1109	28.8214	28.5826	27.8083	NaN	28.9864	NaN				7	7	7	22.4	22.4	22.4	46.337	0	67.676	1494600000	16	Q6AYC2	Q6AYC2	Immunity-related GTPase family M protein	Irgm
32.1075	34.6626	32.0911	34.2679	33.1107	33.3372	32.9723	33.9677				15	15	15	54.7	54.7	54.7	38.798	0	196.04	31074000000	150	Q6AYC4	Q6AYC4	Macrophage-capping protein	Capg
30.3054	30.6883	30.5518	30.6988	30.3555	28.9286	30.3019	30.1906				19	19	19	51.3	51.3	51.3	43.656	0	77.903	5576400000	104	Q6AYD3	Q6AYD3	Proliferation-associated protein 2G4	Pa2g4
NaN	NaN	NaN	26.6301	NaN	NaN	25.6794	NaN				3	3	3	10.2	10.2	10.2	41.936	0	3.3737	80605000	4	Q6AYD4	Q6AYD4	Endothelial cell-selective adhesion molecule	Esam
24.5989	NaN	25.4763	NaN	NaN	NaN	NaN	NaN				4	4	4	16.8	16.8	16.8	39.938	0	3.353	111080000	4	Q6AYD9	Q6AYD9	Nucleoside diphosphate-linked moiety X motif 19, mitochondrial	Nudt19
27.1636	27.7367	27.169	27.7025	28.0315	NaN	27.7719	NaN				6	6	5	19.2	19.2	17	40.787	0	26.025	778390000	18	Q6AYE2	Q6AYE2	Endophilin-B1	Sh3glb1
25.6036	25.4714	25.8135	25.3936	25.0331	NaN	25.2577	NaN				6	6	6	16.5	16.5	16.5	49.998	0	5.4453	186160000	14	Q6AYG3	Q6AYG3	Protein prune homolog	Prune
NaN	NaN	24.0273	NaN	NaN	NaN	NaN	NaN				2	2	2	6.7	6.7	6.7	32.63	0.0010152	0.57774	45580000	1	Q6AYG5	Q6AYG5	Ethylmalonyl-CoA decarboxylase	Echdc1
28.9058	28.6709	29.2793	27.7087	28.1918	27.8715	28.2324	28.4323				11	11	11	34.6	34.6	34.6	44.147	0	57.518	2187800000	52	Q6AYH5	Q6AYH5	Dynactin subunit 2	Dctn2
NaN	25.9009	NaN	26.6202	26.3294	NaN	NaN	NaN				2	2	2	9.7	9.7	9.7	26.968	0	29.315	118890000	8	Q6AYH6	Q6AYH6	ER membrane protein complex subunit 10	Emc10
26.2554	NaN	25.5254	NaN	NaN	25.7057	25.68	NaN				3	3	3	22.3	22.3	22.3	20.751	0	6.4924	308960000	6	Q6AYJ8	Q6AYJ8	Tumor necrosis factor alpha-induced protein 8-like protein 2	Tnfaip8l2
27.2822	NaN	27.6753	NaN	NaN	NaN	27.2278	NaN				4	4	4	14.4	14.4	14.4	34.238	0	7.5712	653900000	12	Q6AYK1	Q6AYK1	RNA-binding protein with serine-rich domain 1	Rnps1
26.5849	NaN	26.7383	26.6588	NaN	NaN	NaN	NaN				4	4	4	11.8	11.8	11.8	60.883	0.0029283	0.0079151	230930000	4	Q6AYK3	Q6AYK3	Inositol-3-phosphate synthase 1	Isyna1
27.9503	27.5429	27.6804	27.4477	27.3015	NaN	27.5444	NaN				8	8	8	40.2	40.2	40.2	26.541	0	11.485	872340000	16	Q6AYK6	Q6AYK6	Calcyclin-binding protein	Cacybp
29.2312	28.8601	29.7025	29.5101	29.1137	27.9321	29.103	NaN				19	19	19	45.1	45.1	45.1	63.988	0	104.96	2773600000	62	Q6AYK8	Q6AYK8	Eukaryotic translation initiation factor 3 subunit D	Eif3d
NaN	NaN	24.5579	NaN	NaN	NaN	NaN	NaN				2	2	2	11	11	11	34.535	0.0010379	0.9187	62442000	2	Q6AYP7	Q6AYP7	7-methylguanosine phosphate-specific 5-nucleotidase	Nt5c3b
26.6942	26.0048	26.3276	25.7229	NaN	NaN	25.8257	NaN				5	5	5	17	17	17	52.882	0	17.945	306120000	5	Q6AYS6	Q6AYS6	Sorting nexin-17	Snx17
26.8098	26.706	26.7075	26.2283	25.2701	NaN	25.9595	NaN				8	8	8	25.7	25.7	25.7	45.804	0	23.502	369900000	16	Q6AYS7;Q6PTT0	Q6AYS7	Aminoacylase-1A	Acy1a
27.9732	28.1494	28.0422	28.4735	28.1465	NaN	28.7066	NaN				7	7	7	33.6	33.6	33.6	32.937	0	47.473	1404300000	29	Q6AYS8;Q5M875	Q6AYS8	Estradiol 17-beta-dehydrogenase 11	Hsd17b11
NaN	NaN	24.8288	NaN	NaN	NaN	NaN	NaN				3	3	3	15.8	15.8	15.8	34.975	0	3.7084	111240000	3	Q6AYT0	Q6AYT0	Quinone oxidoreductase	Cryz
29.9456	29.032	29.9534	28.4918	29.228	27.708	29.3189	27.616				16	16	16	38.2	38.2	38.2	55.249	0	47.201	3569600000	62	Q6AYT3	Q6AYT3	tRNA-splicing ligase RtcB homolog	Rtcb
27.6931	28.9949	27.3748	28.643	28.308	NaN	28.037	NaN				9	9	9	22.1	22.1	22.1	45.295	0	20.974	1070600000	31	Q6AYT7	Q6AYT7	Monoacylglycerol lipase ABHD12	Abhd12
25.1843	NaN	25.0039	25.3141	NaN	NaN	NaN	NaN				3	3	3	10.9	10.9	10.9	38.922	0	3.0783	129720000	6	Q6AYU3	Q6AYU3	DnaJ homolog subfamily B member 6	Dnajb6
31.7346	28.6419	31.0609	29.3581	27.687	NaN	30.7439	NaN				20	4	2	54.1	12.5	9.4	49.937	0	45.951	8455900000	54	Q6AYZ1	Q6AYZ1	Tubulin alpha-1C chain	Tuba1c
25.856	25.6937	25.7996	26.0596	NaN	NaN	26.0865	NaN				4	4	4	21.7	21.7	21.7	35.822	0	4.0017	234740000	8	Q6AZ50	Q6AZ50	Ubiquitin-like-conjugating enzyme ATG3	Atg3
29.2329	27.7797	30.8364	29.2467	30.9721	28.9478	29.1047	28.5132				4	4	4	37.8	37.8	37.8	11.065	0	40.362	5173300000	25	Q6B345	Q6B345	Protein S100-A11	S100a11
27.0589	27.2852	27.404	28.0048	NaN	NaN	26.7379	NaN				5	5	5	25.1	25.1	25.1	19.492	0.0033898	-0.10305	563120000	9	Q6BBI8	Q6BBI8	Ubiquitin-fold modifier-conjugating enzyme 1	Ufc1
27.8413	27.1929	28.0046	27.5701	27.8852	NaN	27.7939	NaN				9	9	9	28.4	28.4	28.4	40.765	0.0024618	0.12771	1092600000	21	Q6DGG0	Q6DGG0	Peptidyl-prolyl cis-trans isomerase D	Ppid
25.5734	NaN	25.551	NaN	NaN	NaN	NaN	NaN				3	3	3	21.4	21.4	21.4	22.618	0	13.197	146340000	7	Q6DGG1	Q6DGG1	Alpha/beta hydrolase domain-containing protein 14B	Abhd14b
NaN	NaN	23.8981	NaN	NaN	NaN	NaN	NaN				2	2	2	4.6	4.6	4.6	83.209	0.00052994	1.3072	34832000	1	Q6DKG0	Q6DKG0	N-alpha-acetyltransferase 35, NatC auxiliary subunit	Naa35
26.2845	25.8256	26.674	NaN	25.7038	NaN	26.0794	NaN				2	2	2	1.1	1.1	1.1	219.81	0.00199	0.26598	314680000	4	Q6ED65;Q4V8C3	Q6ED65;Q4V8C3	Echinoderm microtubule-associated protein-like 5;Echinoderm microtubule-associated protein-like 1	Eml5;Eml1
26.2656	25.2299	25.996	25.2565	NaN	NaN	26.1111	NaN				4	4	4	13.2	13.2	13.2	44.982	0	4.1431	263940000	11	Q6EV70	Q6EV70	GDP-fucose protein O-fucosyltransferase 1	Pofut1
24.3345	NaN	23.7982	NaN	NaN	NaN	NaN	NaN				3	3	3	1.6	1.6	1.6	200.5	0.002474	0.1735	45848000	3	Q6F6B3	Q6F6B3	Protein TANC1	Tanc1
27.1851	27.384	26.8603	26.2451	26.5602	NaN	27.2548	NaN				6	6	6	14	14	14	59.182	0	6.9524	537370000	10	Q6GMN2	Q6GMN2	Brain-specific angiogenesis inhibitor 1-associated protein 2	Baiap2
28.7893	29.5056	29.2228	29.7716	28.7502	28.9106	28.8733	29.7836				11	11	11	71.6	71.6	71.6	21.368	0	25.721	1923300000	44	Q6GQP4	Q6GQP4	Ras-related protein Rab-31	Rab31
25.5082	23.55	25.6181	23.3738	NaN	NaN	24.875	NaN				3	3	3	13.5	13.5	13.5	32.002	0	6.1838	160510000	6	Q6I7R3	Q6I7R3	Isochorismatase domain-containing protein 1	Isoc1
NaN	NaN	NaN	NaN	22.2052	NaN	NaN	NaN				4	1	1	6	2.1	2.1	57.254	0.0093197	-0.71883	18012000	0	Q6IG01	Q6IG01	Keratin, type II cytoskeletal 1b	Krt77
26.8259	26.6078	27.0172	26.764	26.0359	NaN	26.0721	NaN				8	8	8	30.3	30.3	30.3	39.19	0	7.6716	440230000	15	Q6IMX7	Q6IMX7	Hsp70-binding protein 1	Hspbp1
26.4813	26.7728	26.9659	27.2632	25.9566	NaN	26.4946	NaN				5	5	5	18.2	18.2	18.2	44.077	0	3.8356	504690000	16	Q6IRE4	Q6IRE4	Tumor susceptibility gene 101 protein	Tsg101
27.4098	NaN	27.4875	NaN	26.2643	NaN	26.5082	NaN				5	5	5	15.7	15.7	15.7	52.041	0	10.78	530270000	7	Q6IRK9	Q6IRK9	Carboxypeptidase Q	Cpq
NaN	25.9962	27.2047	25.454	26.2694	NaN	25.7754	NaN				4	4	4	26.3	26.3	26.3	18.991	0.00052576	1.1714	344910000	5	Q6IUR5	Q6IUR5	Neudesin	Nenf
25.8899	25.9798	27.6823	NaN	NaN	NaN	26.4593	NaN				6	6	6	32.3	32.3	32.3	25.664	0	16.468	503840000	11	Q6J2U6	Q6J2U6	E3 ubiquitin-protein ligase RNF114	Rnf114
27.385	28.5262	26.991	28.4219	27.8794	NaN	27.7727	NaN				3	3	3	11.9	11.9	11.9	42.954	0	12.209	672600000	18	Q6JE36	Q6JE36	Protein NDRG1	Ndrg1
NaN	25.0937	NaN	25.5544	NaN	NaN	25.0854	NaN				2	2	2	4.8	4.8	4.8	49.846	0	4.7889	74009000	5	Q6JWR2	Q6JWR2	Putative sodium-coupled neutral amino acid transporter 7	Slc38a7
25.6726	NaN	25.704	NaN	NaN	NaN	NaN	NaN				5	5	5	10.7	10.7	10.7	68.706	0	17.123	144250000	8	Q6MG06	Q6MG06	Guanine nucleotide-binding protein-like 1	Gnl1
27.1783	27.629	27.4507	27.3552	27.2098	NaN	27.0102	NaN				8	8	8	12.8	12.8	12.8	95.251	0	33.252	800500000	18	Q6MG08	Q6MG08	ATP-binding cassette sub-family F member 1	Abcf1
24.1035	NaN	24.6178	NaN	NaN	NaN	NaN	NaN				2	2	2	11.5	11.5	11.5	29.381	0.0024667	0.13553	64979000	2	Q6MG14	Q6MG14	Nurim	Nrm
26.7804	NaN	27.4991	NaN	25.6063	NaN	26.4019	NaN				7	7	7	10.2	10.2	10.2	120.01	0	47.889	545710000	17	Q6MG49	Q6MG49	Large proline-rich protein BAG6	Bag6
25.5093	25.5802	25.7496	25.9792	25.3584	NaN	25.793	NaN				6	6	6	12	12	12	63.037	0	2.5641	221220000	12	Q6MG55	Q6MG55	Abhydrolase domain-containing protein 16A	Abhd16a
27.2859	NaN	27.2959	NaN	26.881	NaN	26.7087	NaN				5	4	4	24.2	21.4	21.4	29.688	0	7.6376	440470000	6	Q6MG60	Q6MG60	N(G),N(G)-dimethylarginine dimethylaminohydrolase 2	Ddah2
32.0436	32.5469	32.43	32.8846	30.7657	30.2607	32.0526	30.6496				14	14	14	79.3	79.3	79.3	26.98	0	198.8	18665000000	142	Q6MG61	Q6MG61	Chloride intracellular channel protein 1	Clic1
24.147	NaN	24.8229	NaN	NaN	NaN	NaN	NaN				2	2	2	14.7	14.7	14.7	18.659	0.00053996	1.5639	77992000	3	Q6MGD0	Q6MGD0	Protein CutA	Cuta
27.7183	27.6948	27.4473	27.7017	27.8767	NaN	27.8615	NaN				4	4	4	25.7	25.7	25.7	24.355	0	21.245	868870000	13	Q6NX65	Q6NX65	Programmed cell death protein 10	Pdcd10
32.3524	32.7244	32.4004	32.9341	32.1642	31.5349	32.3228	30.7706				10	10	7	64.9	64.9	46.3	22.677	0	85.931	16718000000	75	Q6NYB7	Q6NYB7	Ras-related protein Rab-1A	Rab1A
26.0438	NaN	25.9969	NaN	NaN	NaN	NaN	NaN				8	4	4	14.8	8.3	8.3	81.8	0	2.3456	179260000	5	Q6P0K8	Q6P0K8	Junction plakoglobin	Jup
27.096	26.7848	27.0301	26.5797	26.1282	NaN	26.8443	26.0796				4	4	4	30.1	30.1	30.1	23.235	0	25.849	479440000	16	Q6P4Z9	Q6P4Z9	COP9 signalosome complex subunit 8	Cops8
31.9638	31.6806	32.0333	31.5862	31.3747	30.4404	31.662	31.2673				27	27	27	57.4	57.4	57.4	60.646	0	220.56	14055000000	157	Q6P502	Q6P502	T-complex protein 1 subunit gamma	Cct3
29.5632	30.8406	29.4958	30.5629	28.6942	30.826	30.4352	NaN				7	7	7	48.1	48.1	48.1	23.668	0	67.28	3030500000	38	Q6P686	Q6P686	Osteoclast-stimulating factor 1	Ostf1
27.939	NaN	26.7928	NaN	27.0344	NaN	25.4096	NaN				5	5	5	10.9	10.9	10.9	62.201	0	8.4303	431310000	8	Q6P689	Q6P689	Protein wntless homolog	Wls
26.2357	NaN	25.9444	26.249	NaN	NaN	25.6332	NaN				4	4	4	14.5	14.5	14.5	54.194	0	11.65	219930000	8	Q6P6Q9	Q6P6Q9	Calcium uptake protein 1, mitochondrial	Micu1
28.7991	28.7565	28.9649	28.8241	29.5824	NaN	28.9505	28.258				11	11	11	29.9	29.9	29.9	54.037	0	37.892	2224200000	37	Q6P6R2	Q6P6R2	Dihydrolipoyl dehydrogenase, mitochondrial	Dld
25.8177	NaN	26.0749	NaN	NaN	NaN	25.0849	NaN				4	4	4	10.5	10.5	10.5	52.349	0	6.897	194630000	6	Q6P6S4	Q6P6S4	Nucleotide exchange factor SIL1	Sil1
28.391	28.2386	28.4306	28.4335	28.627	28.1308	28.6118	NaN				13	13	13	26.2	26.2	26.2	70.71	0	40.794	1628800000	34	Q6P6T4	Q6P6T4	Echinoderm microtubule-associated protein-like 2	Eml2
25.5426	26.7966	26.1344	29.018	25.5067	NaN	26.3252	NaN				5	5	5	11.8	11.8	11.8	58.82	0	3.4581	373070000	5	Q6P6U0	Q6P6U0	Tyrosine-protein kinase Fgr	Fgr
33.1754	33.2503	33.2574	33.6787	32.4413	32.3264	33.4649	30.8068				18	18	18	43.4	43.4	43.4	62.826	0	134.7	39631000000	247	Q6P6V0;CON__Q3ZBD7	Q6P6V0	Glucose-6-phosphate isomerase	Gpi
NaN	NaN	NaN	NaN	NaN	NaN	26.2281	NaN				3	3	3	6.9	6.9	6.9	55.611	0.0005305	1.3416	102690000	3	Q6P734	Q6P734	Plasma protease C1 inhibitor	Serping1
28.5944	NaN	28.8811	NaN	NaN	NaN	28.5426	NaN				2	2	2	17.9	17.9	17.9	16.556	0	9.799	1642500000	10	Q6P742	Q6P742	Proteolipid protein 2	Plp2
28.695	28.0638	28.844	27.7449	28.7365	28.0681	28.5809	NaN				8	8	8	15.7	15.7	15.7	60.806	0.0029297	0.014518	1920200000	19	Q6P747	Q6P747	Heterochromatin protein 1-binding protein 3	Hp1bp3
25.571	NaN	25.5211	NaN	NaN	NaN	25.6771	NaN				2	2	2	15.6	15.6	15.6	28.404	0	2.6622	183300000	4	Q6P756	Q6P756	Adaptin ear-binding coat-associated protein 2	Necap2
28.1565	27.0068	27.7336	27.0421	29.1987	NaN	28.4338	NaN				2	2	2	9.8	9.8	9.8	19.9	0.0010477	1.0863	984080000	17	Q6P767	Q6P767	Pituitary tumor-transforming gene 1 protein-interacting protein	Pttg1ip
26.7793	27.9378	26.454	27.8493	26.2717	25.359	27.1843	NaN				3	3	3	29.8	29.8	29.8	17.721	0	16.601	473400000	15	Q6P791	Q6P791	Ragulator complex protein LAMTOR1	Lamtor1
30.2508	29.6768	30.5119	29.8633	29.7573	27.5147	29.68	28.6745				16	16	16	38.7	38.7	38.7	58.587	0	78.251	4914600000	70	Q6P799	Q6P799	Serine--tRNA ligase, cytoplasmic	Sars
NaN	NaN	25.5782	25.5072	NaN	NaN	NaN	NaN				4	4	4	4.7	4.7	4.7	122.38	0.0010482	1.1008	136180000	3	Q6P7A2	Q6P7A2	Ubiquitin conjugation factor E4 A	Ube4a
28.8186	29.1077	28.7528	27.9338	29.4146	NaN	28.6277	NaN				12	12	12	17.2	17.2	17.2	106.21	0	59.164	1784100000	34	Q6P7A9	Q6P7A9	Lysosomal alpha-glucosidase	Gaa
29.0856	29.7948	29.7049	30.0025	29.2068	28.2972	29.4032	28.2493				16	16	16	43.5	43.5	43.5	54.143	0	62.084	2518500000	49	Q6P7B0	Q6P7B0	Tryptophan--tRNA ligase, cytoplasmic;T1-TrpRS;T2-TrpRS	Wars
29.7406	29.2108	29.115	28.0299	28.9046	NaN	28.0079	NaN				7	7	7	14.9	14.9	14.9	63.731	0	35.844	2641300000	30	Q6P7C7	Q6P7C7	Transmembrane glycoprotein NMB	Gpnmb
26.7688	27.6383	26.6999	27.1621	27.2484	NaN	27.2683	26.8428				7	7	7	19.3	19.3	19.3	51.997	0	5.0399	595180000	19	Q6P7D4	Q6P7D4	Cytochrome P450 20A1	Cyp20a1
29.2685	29.5063	29.1947	30.0641	29.5918	28.9754	28.9678	29.0237				8	8	8	17.9	17.9	17.9	48.043	0	6.4858	2692300000	36	Q6P7P5	Q6P7P5	Basic leucine zipper and W2 domain-containing protein 1	Bzw1
25.8218	NaN	26.2493	25.5116	NaN	NaN	25.4387	NaN				5	5	5	14.6	14.6	14.6	43.558	0	4.2825	201260000	7	Q6P7Q1	Q6P7Q1	BRCA1-A complex subunit BRE	Bre
29.7376	29.3177	29.6871	29.0299	28.1495	28.4392	29.3092	NaN				6	6	6	42.4	42.4	42.4	20.819	0	29.575	2789400000	29	Q6P7Q4	Q6P7Q4	Lactoylglutathione lyase	Glo1
28.7823	28.4708	28.9906	27.386	28.73	28.1023	29.15	NaN				5	5	5	18.9	18.9	18.9	34.84	0	8.9601	1969100000	17	Q6P7R8	Q6P7R8	Very-long-chain 3-oxoacyl-CoA reductase	Hsd17b12
30.4573	30.5896	29.4969	30.1342	31.5541	30.2494	30.7062	29.4312				13	13	13	31.7	31.7	31.7	44.443	0	43.72	5660100000	62	Q6P7S1	Q6P7S1	Acid ceramidase	Asah1
35.2792	33.8432	35.4303	33.8523	34.0066	33.031	34.4195	32.7609				26	26	5	67.6	67.6	16.4	49.8	0	323.31	108070000000	494	Q6P9T8	Q6P9T8	Tubulin beta-4B chain	Tubb4b
26.5083	27.1678	26.7238	26.8511	NaN	NaN	26.7502	NaN				6	6	6	39.5	39.5	39.5	21.932	0	13.388	424190000	11	Q6P9U3	Q6P9U3	COMM domain-containing protein 3	Commd3
28.0808	28.6569	28.2765	28.3818	29.0061	NaN	28.4333	29.4945				9	9	9	33	33	33	39.905	0	14.953	1565300000	18	Q6P9U8	Q6P9U8	Eukaryotic translation initiation factor 3 subunit H	Eif3h
35.2202	34.8306	34.9966	34.2736	33.8177	31.6709	34.8269	31.5353				21	21	0	58.5	58.5	0	50.151	0	323.31	110450000000	347	Q6P9V9	Q6P9V9	Tubulin alpha-1B chain	Tuba1b
24.8856	NaN	25.2654	NaN	NaN	NaN	NaN	NaN				2	2	2	13.8	13.8	13.8	19.127	0	2.5464	107910000	4	Q6P9X4;Q78EG7	Q6P9X4;Q78EG7	Protein tyrosine phosphatase type IVA 2;Protein tyrosine phosphatase type IVA 1	Ptp4a2;Ptp4a1
27.7646	28.1442	27.9286	27.5401	27.2078	NaN	27.2829	NaN				8	8	8	45.9	45.9	45.9	23.992	0	45.661	1009300000	22	Q6PCT3	Q6PCT3	Tumor protein D54	Tpd52l2
29.3428	29.7207	29.2346	30.3843	27.2297	27.5916	29.6242	NaN				8	8	8	34.1	34.1	34.1	26.128	0	75.749	3152900000	49	Q6PCU2	Q6PCU2	V-type proton ATPase subunit E 1	Atp6v1e1
28.4731	28.0493	28.5359	27.5757	27.8755	27.8193	28.4641	NaN				4	4	4	19	19	19	25.476	0	55.777	1333700000	24	Q6PDU1	Q6PDU1	Serine/arginine-rich splicing factor 2	Srsf2
27.6164	26.9607	28.4222	27.2391	24.5265	NaN	28.265	NaN				3	3	3	39.8	39.8	39.8	11.433	0	4.7883	991710000	10	Q6PDU7	Q6PDU7	ATP synthase subunit g, mitochondrial	Atp5l
31.4264	30.2722	31.3758	30.6516	30.5645	29.1959	30.469	30.1761				11	11	11	46.3	46.3	46.3	24.604	0	76.09	10171000000	81	Q6PDV7	Q6PDV7	60S ribosomal protein L10	Rpl10
28.3336	29.4611	28.1615	28.8533	29.2933	NaN	28.5997	29.4108				8	8	8	52.8	52.8	52.8	12.744	0	17.964	1965900000	27	Q6PEC1	Q6PEC1	Tubulin-specific chaperone A	Tbca
26.636	NaN	26.4406	NaN	NaN	NaN	26.4865	NaN				2	2	2	14.3	14.3	14.3	28.418	0	4.7182	355480000	6	Q6PEC3	Q6PEC3	Protein YIF1B	Yif1b
27.9988	28.4763	28.1648	28.0421	29.0529	NaN	27.6771	29.1837				7	7	7	51.5	51.5	51.5	18.672	0	41.25	1502800000	32	Q6PEC4	Q6PEC4	S-phase kinase-associated protein 1	Skp1
32.2212	33.6618	32.223	33.6248	33.1619	32.758	32.9482	32.3801				23	23	23	57.3	57.3	57.3	52.693	0	179.94	26197000000	223	Q6Q0N1	Q6Q0N1	Cytosolic non-specific dipeptidase	Cndp2
27.3444	26.5666	27.2237	NaN	26.4052	NaN	26.6088	NaN				7	7	7	13	13	13	63.652	0	7.81	559690000	10	Q6Q0N3	Q6Q0N3	5-nucleotidase domain-containing protein 2	Nt5dc2
28.0057	28.1921	27.8145	28.8895	28.7876	NaN	28.5243	NaN				8	8	8	24.7	24.7	24.7	44.011	0	9.7751	1106600000	17	Q6Q7Y5	Q6Q7Y5	Guanine nucleotide-binding protein subunit alpha-13	Gna13
24.8575	NaN	25.121	NaN	24.9735	NaN	24.3627	NaN				3	3	3	13.5	13.5	13.5	31.646	0	15.172	100470000	9	Q6QBQ4	Q6QBQ4	Phospholipid scramblase 3	Plscr3
24.6146	24.257	25.6439	NaN	NaN	NaN	24.4799	NaN				4	4	4	4.6	4.6	4.6	111.26	0	4.3017	128540000	4	Q6QI44	Q6QI44	N-alpha-acetyltransferase 25, NatB auxiliary subunit	Naa25
NaN	NaN	NaN	NaN	NaN	NaN	24.6487	NaN				5	1	1	5.7	1.4	1.4	116.91	0.009324	-0.7187	149640000	1	Q6QLM7	Q6QLM7	Kinesin heavy chain isoform 5A	Kif5a
29.1467	28.8576	29.0438	29.7585	28.4899	NaN	28.8186	NaN				2	2	2	5.4	5.4	5.4	101.52	0	8.8557	2152100000	23	Q6RJR6	Q6RJR6	Reticulon-3	Rtn3
31.7191	32.6215	31.8558	33.1306	31.9898	31.5937	31.8807	32.6647				8	8	7	49.5	49.5	43.8	21.45	0	70.89	17564000000	95	Q6RUV5	Q6RUV5	Ras-related C3 botulinum toxin substrate 1	Rac1
26.0125	24.7478	NaN	25.2415	24.8187	NaN	25.4943	NaN				2	2	2	10.8	10.8	10.8	19.778	0.00053447	1.4303	154700000	8	Q6TEK3	Q6TEK3	Vitamin K epoxide reductase complex subunit 1-like protein 1	Vkorc1l1
NaN	26.1212	NaN	25.5579	24.5502	NaN	NaN	NaN				2	2	2	2.3	2.3	2.3	97.179	0.0010267	0.73332	53776000	4	Q6TLK4	Q6TLK4	Rho GTPase-activating protein 27	Arhgap27
NaN	NaN	24.2418	NaN	NaN	NaN	NaN	NaN				2	2	2	10.4	10.4	10.4	44.95	0.00053591	1.4569	33330000	2	Q6TMA8	Q6TMA8	Angiopoietin-related protein 4	Angptl4
24.6117	24.0696	25.4313	24.168	23.2022	NaN	24.409	NaN				3	3	3	2.9	2.9	2.9	164.46	0	6.6974	115080000	6	Q6TRW4	Q6TRW4	Sister chromatid cohesion protein PDS5 homolog B	Pds5b
NaN	NaN	25.2	NaN	NaN	NaN	NaN	NaN				2	2	2	9.5	9.5	9.5	37.973	0.0043145	-0.26966	117160000	4	Q6TUD4	Q6TUD4	Protein YIPF3	Yipf3
29.1261	29.3073	29.1552	29.5849	28.6183	NaN	29.2321	28.3697				10	10	10	31.3	31.3	31.3	40.495	0	40.703	2435500000	45	Q6TUG0	Q6TUG0	DnaJ homolog subfamily B member 11	Dnajb11
26.6604	26.22	26.931	25.911	27.8229	NaN	27.1708	27.4184				5	5	5	24.7	24.7	24.7	28.729	0	4.9047	452900000	14	Q6TXG9	Q6TXG9	Swi5-dependent recombination DNA repair protein 1 homolog	Sfr1
24.9374	NaN	25.0656	NaN	NaN	NaN	NaN	NaN				3	3	3	7	7	7	48.299	0	1.7313	93890000	4	Q6U6G5	Q6U6G5	Zinc finger CCCH domain-containing protein 15	Zc3h15
28.3552	28.8776	28.1081	28.4544	29.2636	29.4672	28.1126	29.2947				9	9	9	15.3	15.3	15.3	68.197	0	10.866	920940000	28	Q6UPE1	Q6UPE1	Electron transfer flavoprotein-ubiquinone oxidoreductase, mitochondrial	Etfdh
28.7619	NaN	28.7165	NaN	28.2511	NaN	27.8817	NaN				8	8	8	12.2	12.2	12.2	99.896	0	56.864	1510600000	14	Q6UPR8	Q6UPR8	Endoplasmic reticulum metallopeptidase 1	Ermp1
31.962	31.9522	32.2036	31.6346	32.183	31.4951	32.0535	32.1618				17	17	17	47	47	47	39.652	0	144.42	17162000000	130	Q6URK4	Q6URK4	Heterogeneous nuclear ribonucleoprotein A3	Hnrnpa3
28.4553	28.0065	28.2821	28.8131	NaN	NaN	27.7673	NaN				4	4	4	12.9	12.9	12.9	35.148	0	21.073	1311000000	22	Q6VBQ5	Q6VBQ5	Myeloid-associated differentiation marker	Myadm
NaN	NaN	NaN	NaN	NaN	NaN	25.5143	NaN				3	3	3	18.1	18.1	18.1	16.502	0	2.0325	274710000	2	Q6VV72	Q6VV72	Eukaryotic translation initiation factor 1A	Eif1a
NaN	NaN	23.5059	NaN	NaN	NaN	NaN	NaN				2	2	2	5.7	5.7	5.7	33.856	0.0093153	-0.7193	39993000	1	Q6Y1S1	Q6Y1S1	Myeloid differentiation primary response protein MyD88	Myd88
25.0753	NaN	25.3413	NaN	NaN	NaN	24.984	NaN				3	3	3	6.5	6.5	6.5	70.8	0	2.2252	129890000	4	Q704S8	Q704S8	Carnitine O-acetyltransferase	Crat
29.6873	28.9468	29.911	29.0188	28.398	28.9098	29.2515	28.4928				10	10	10	53.4	53.4	53.4	28.004	0	206.18	2163300000	40	Q711G3	Q711G3	Isoamyl acetate-hydrolyzing esterase 1 homolog	Iah1
NaN	NaN	28.504	NaN	NaN	NaN	NaN	NaN				3	1	1	38.1	13.1	13.1	9.461	0.0019871	0.25569	874550000	4	Q71TY3	Q71TY3	40S ribosomal protein S27	Rps27
29.7433	29.321	29.7372	28.9917	29.6998	28.5028	29.2587	28.4893				10	10	10	34.8	34.8	34.8	47.82	0	15.33	3180100000	44	Q71UF4	Q71UF4	Histone-binding protein RBBP7	Rbbp7
26.7568	NaN	26.7809	26.604	26.7142	NaN	26.8563	NaN				7	7	7	15.9	15.9	15.9	67.444	0	17.518	481470000	11	Q75Q39	Q75Q39	Mitochondrial import receptor subunit TOM70	Tomm70a
25.4567	NaN	26.2925	NaN	NaN	NaN	NaN	NaN				4	4	4	19.9	19.9	19.9	37.919	0	26.037	199140000	3	Q75Q40	Q75Q40	Mitochondrial import receptor subunit TOM40 homolog	Tomm40
27.2858	NaN	27.2023	27.2653	NaN	NaN	26.9098	NaN				4	4	4	48.6	48.6	48.6	15.49	0	63.695	606610000	13	Q75Q41	Q75Q41	Mitochondrial import receptor subunit TOM22 homolog	Tomm22
30.3557	29.5565	31.3117	29.1906	30.4172	29.2224	30.8638	28.3948				23	23	23	36.5	36.5	36.5	91.481	0	118.9	8106800000	90	Q75WE7	Q75WE7	von Willebrand factor A domain-containing protein 5A	Vwa5a
30.1552	26.7833	30.0663	26.7848	27.9311	NaN	27.1512	NaN				13	13	13	15.8	15.8	15.8	104.38	0	21.619	1937800000	26	Q765A7	Q765A7	GPI inositol-deacylase	Pgap1
25.2674	NaN	24.9858	NaN	NaN	NaN	NaN	NaN				4	1	1	50.6	24.7	24.7	10.35	0	30.595	100580000	5	Q78P75	Q78P75	Dynein light chain 2, cytoplasmic	Dynll2
25.9718	24.6088	24.7794	NaN	NaN	NaN	NaN	NaN				3	3	3	7.6	7.6	7.6	48.906	0	3.7798	118780000	9	Q793F9;Q6GX84	Q793F9	Vacuolar protein sorting-associated protein 4A	Vps4a
31.072	29.7706	31.0366	29.4884	30.0689	NaN	30.567	29.9114				12	11	10	39	36.6	32.5	45.729	0	131.63	7055000000	54	Q794E4	Q794E4	Heterogeneous nuclear ribonucleoprotein F;Heterogeneous nuclear ribonucleoprotein F, N-terminally processed	Hnrnpf
29.4041	31.2203	29.2435	31.9336	30.8693	30.8535	30.3395	32.0981				11	11	11	24.5	24.5	24.5	58.071	0	56.779	5307000000	60	Q794F9	Q794F9	4F2 cell-surface antigen heavy chain	Slc3a2
32.5784	32.2259	32.4867	31.9257	32.6425	31.8904	31.8797	32.7005				12	12	12	73.3	73.3	73.3	18.533	0	158.48	22022000000	88	Q7M0E3	Q7M0E3	Destrin	Dstn
28.9728	29.9654	29.1539	29.9632	29.8694	29.1694	29.1617	30.0024				5	5	5	39.3	39.3	39.3	16.353	0	5.8841	2598000000	42	Q7M767	Q7M767	Ubiquitin-conjugating enzyme E2 variant 2	Ube2v2
27.4291	28.3566	27.1212	27.3638	29.2563	30.7329	28.5795	29.3604				5	4	4	1.1	0.8	0.8	536.02	0	2.7446	853300000	14	Q7TMA5	Q7TMA5	Apolipoprotein B-100;Apolipoprotein B-48	Apob
25.4264	27.0904	NaN	26.0785	NaN	NaN	NaN	NaN				2	2	2	6.6	6.6	6.6	50.553	0.0010106	0.52679	159410000	3	Q7TNK0	Q7TNK0	Serine incorporator 1	Serinc1
27.5488	27.0474	27.2783	26.5948	26.6557	NaN	26.8872	27.1822				9	9	9	22.4	22.4	22.4	60.478	0	26.649	773060000	26	Q7TNY6	Q7TNY6	Golgi resident protein GCP60	Acbd3
NaN	NaN	NaN	NaN	NaN	NaN	25.3906	NaN				3	3	3	10.5	10.5	10.5	25.836	0	16.841	197190000	2	Q7TP17	Q7TP17	Splicing factor U2AF 26 kDa subunit	U2af1l4
30.5402	29.5776	30.8401	29.8238	28.9262	26.1914	29.836	NaN				12	12	12	29.8	29.8	29.8	59.71	0	44.045	4774500000	70	Q7TP47	Q7TP47	Heterogeneous nuclear ribonucleoprotein Q	Syncrip
26.8441	NaN	26.7959	NaN	NaN	NaN	NaN	NaN				4	4	4	12.8	12.8	12.8	42.062	0	3.0643	411140000	6	Q7TP48	Q7TP48	Adipocyte plasma membrane-associated protein	Apmap
28.4773	27.5263	28.3485	28.0213	27.7045	26.5728	27.9774	NaN				9	9	9	23.5	23.5	23.5	51.38	0	7.0274	1304600000	23	Q7TP98	Q7TP98	Interleukin enhancer-binding factor 2	Ilf2
31.5783	31.4518	31.5726	31.5281	31.3419	30.5882	31.1898	30.8518				20	20	20	52.3	52.3	52.3	58.099	0	177.81	12499000000	115	Q7TPB1	Q7TPB1	T-complex protein 1 subunit delta	Cct4
30.2385	28.2911	30.2506	29.0438	29.6041	28.3015	29.6052	28.8574				4	4	4	18.2	18.2	18.2	35.629	0	10.174	2744900000	30	Q7TPJ0	Q7TPJ0	Translocon-associated protein subunit alpha	Ssr1
25.0869	NaN	25.9077	NaN	NaN	NaN	NaN	NaN				2	2	2	26.8	26.8	26.8	9.8492	0	7.3966	177990000	7	Q7TQ16	Q7TQ16	Cytochrome b-c1 complex subunit 8	Uqcrq
25.2728	NaN	25.6405	NaN	NaN	NaN	24.8969	NaN				3	3	3	6.1	6.1	6.1	71.768	0	3.2365	143990000	5	Q7TQ20	Q7TQ20	DnaJ homolog subfamily C member 2;DnaJ homolog subfamily C member 2, N-terminally processed	Dnajc2
23.5164	NaN	23.577	NaN	NaN	NaN	NaN	NaN				2	2	2	9.5	9.5	9.5	35.642	0.00052604	1.1744	35229000	2	Q7TQ84	Q7TQ84	UAP56-interacting factor	Fyttd1
24.5845	NaN	25.4674	NaN	NaN	NaN	24.6208	NaN				3	3	3	15.1	15.1	15.1	32.09	0	42.575	120550000	6	Q7TQ94	Q7TQ94	Nitrilase homolog 1	Nit1
26.8992	26.3943	26.7301	26.9439	25.8116	NaN	26.3877	NaN				10	10	4	6.6	6.6	2.7	201.97	0	13.041	388760000	17	Q7TSU1	Q7TSU1	Brefeldin A-inhibited guanine nucleotide-exchange protein 2	Arfgef2
26.3289	NaN	26.3806	26.7208	26.2963	NaN	26.2858	NaN				8	8	8	5.9	5.9	5.9	194.89	0	4.5504	349140000	10	Q7TT49	Q7TT49	Serine/threonine-protein kinase MRCK beta	Cdc42bpb
28.098	30.4594	27.856	30.4734	27.144	NaN	28.8113	28.656				5	5	5	39.4	39.4	39.4	16.779	0	35.082	1721200000	25	Q80T18	Q80T18	Glia maturation factor gamma	Gmfg
30.1455	28.9861	30.3717	29.4728	28.8039	28.7477	29.3009	28.1863				22	22	22	27.7	27.7	27.7	123.04	0	79.055	3833000000	62	Q80U96	Q80U96	Exportin-1	Xpo1
25.6691	26.0938	25.8691	25.4673	NaN	NaN	25.489	NaN				3	3	3	35.5	35.5	35.5	14.854	0.0014963	0.28394	196500000	3	Q80W89	Q80W89	NADH dehydrogenase [ubiquinone] 1 alpha subcomplex subunit 11	Ndufa11
27.279	28.1438	27.6184	28.384	26.7044	NaN	27.9682	NaN				12	12	12	18.6	18.6	18.6	88.067	0	16.322	738970000	27	Q80W92	Q80W92	Protein VAC14 homolog	Vac14
25.6357	NaN	25.8151	NaN	NaN	NaN	NaN	NaN				7	6	6	13.7	12.3	12.3	66.78	0	5.4135	183800000	7	Q80WE1	Q80WE1	Fragile X mental retardation protein 1 homolog	Fmr1
26.3652	26.775	25.8811	26.7112	27.2881	NaN	27.2385	NaN				3	3	3	8.8	8.8	8.8	51.676	0	11.988	317970000	11	Q80WK7	Q80WK7	Equilibrative nucleoside transporter 3	Slc29a3
NaN	NaN	NaN	NaN	NaN	NaN	23.5547	NaN				2	2	2	3.9	3.9	3.9	50.011	0	2.6366	22578000	3	Q80WL2	Q80WL2	Bystin	Bysl
NaN	NaN	24.702	NaN	NaN	NaN	NaN	NaN				2	2	2	2.2	2.2	2.2	145.15	0.00053476	1.4351	131990000	5	Q80X08	Q80X08	WASH complex subunit FAM21	Fam21
29.0225	30.5165	30.6798	31.2821	29.9345	29.3124	30.9788	29.9986				20	20	20	55.2	55.2	55.2	55.437	0	113.31	5767000000	114	Q80Z29	Q80Z29	Nicotinamide phosphoribosyltransferase	Nampt
25.0984	NaN	25.7591	NaN	NaN	NaN	NaN	NaN				5	5	5	9.7	9.7	9.7	88.682	0	5.3302	190820000	6	Q80Z70	Q80Z70	Protein sel-1 homolog 1	Sel1l
NaN	NaN	NaN	NaN	22.748	NaN	NaN	NaN				3	3	3	7.8	7.8	7.8	59.832	0	16.506	43530000	2	Q80ZG1	Q80ZG1	Synembryn-A	Ric8a
26.4735	26.3305	26.5643	NaN	26.6126	NaN	26.037	NaN				3	3	3	15	15	15	24.713	0	6.9834	248320000	13	Q810F4	Q810F4	Protein FAM3C	Fam3c
31.5405	24.3249	31.5858	25.3254	30.6207	NaN	30.1365	26.1241				19	19	19	31.1	31.1	31.1	84.541	0	62.59	8604700000	73	Q811A3	Q811A3	Procollagen-lysine,2-oxoglutarate 5-dioxygenase 2	Plod2
25.5051	25.5716	26.4086	NaN	25.3088	NaN	NaN	NaN				4	3	3	7.8	6.2	6.2	59.638	0.00053191	1.3835	256120000	4	Q812D1	Q812D1	PC4 and SFRS1-interacting protein	Psip1
25.0757	25.4214	25.4963	25.621	25.0215	NaN	25.4101	NaN				6	6	6	5.6	5.6	5.6	134.56	0.0010444	1.0322	168140000	8	Q8CF97	Q8CF97	Deubiquitinating protein VCIP135	Vcpip1
31.4421	31.4159	31.3829	31.5889	31.6342	31.6427	30.8246	32.066				6	5	5	42.4	36.6	36.6	21.258	0	23.422	8514400000	49	Q8CFN2;Q9JJL4	Q8CFN2	Cell division control protein 42 homolog	Cdc42
27.0007	NaN	26.1109	NaN	26.7286	NaN	NaN	NaN				4	4	4	20.4	20.4	20.4	26.424	0	17.656	253600000	7	Q8CG08	Q8CG08	Collagen triple helix repeat-containing protein 1	Cthrc1
NaN	NaN	NaN	NaN	NaN	NaN	25.8882	NaN				2	2	2	1.7	1.7	1.7	171.49	0	4.6916	130510000	2	Q8CG09	Q8CG09	Multidrug resistance-associated protein 1	Abcc1
28.3014	27.413	28.4866	27.3432	NaN	NaN	28.7877	NaN				7	7	7	28.3	28.3	28.3	40.675	0	46.347	1611500000	16	Q8CG45	Q8CG45	Aflatoxin B1 aldehyde reductase member 2	Akr7a2
26.9778	26.5693	26.571	26.8242	26.9389	NaN	26.5606	NaN				3	3	3	13	13	13	25.062	0	3.1239	438880000	11	Q8CGS4	Q8CGS4	Charged multivesicular body protein 3	Chmp3
NaN	NaN	23.7657	NaN	NaN	NaN	NaN	NaN				3	3	3	5.4	5.4	5.4	92.339	0.0024534	0.10619	23961000	2	Q8CGS5	Q8CGS5	Zinc phosphodiesterase ELAC protein 2	Elac2
27.1887	27.2576	27.8204	27.9605	27.5442	NaN	27.1711	NaN				8	8	8	16.2	16.2	16.2	78.399	0	55.96	742490000	31	Q8CGU6	Q8CGU6	Nicastrin	Ncstn
27.9768	NaN	27.99	NaN	26.8963	NaN	26.9618	NaN				9	9	9	21.3	21.3	21.3	63.436	0	33.039	759580000	14	Q8CGX0	Q8CGX0	Insulin-like growth factor 2 mRNA-binding protein 1	Igf2bp1
30.7877	32.3835	30.7843	32.7751	31.3763	31.007	31.1893	31.3341				15	15	15	33.5	33.5	33.5	63.758	0	39.853	9598600000	78	Q8CHN6	Q8CHN6	Sphingosine-1-phosphate lyase 1	Sgpl1
27.1705	26.3609	27.2728	26.3707	NaN	NaN	25.922	NaN				10	10	10	6.7	6.7	6.7	181.43	0	9.5456	449820000	10	Q8K1P7	Q8K1P7	Transcription activator BRG1	Smarca4
27.8112	27.9532	28.4567	28.4185	27.946	NaN	27.8735	NaN				7	7	7	18.1	18.1	18.1	56.86	0	33.324	1269700000	27	Q8K1Q0	Q8K1Q0	Glycylpeptide N-tetradecanoyltransferase 1	Nmt1
NaN	NaN	25.545	NaN	NaN	NaN	NaN	NaN				2	2	2	30.6	30.6	30.6	15.957	0	15.934	102810000	3	Q8K3F3	Q8K3F3	Protein phosphatase 1 regulatory subunit 14B	Ppp1r14b
NaN	25.7054	25.8691	26.1752	NaN	NaN	NaN	NaN				7	7	7	11.2	11.2	11.2	86.77	0	1.8441	177160000	6	Q8K3Y6	Q8K3Y6	Zinc finger CCCH-type antiviral protein 1	Zc3hav1
26.2189	26.3497	26.1995	26.8859	26.2314	NaN	26.1512	NaN				4	4	4	17.9	17.9	17.9	38.713	0	3.3112	328020000	9	Q8K4F7	Q8K4F7	m7GpppX diphosphatase	Dcps
NaN	26.1137	NaN	26.3059	26.0871	NaN	NaN	NaN				2	2	2	1.9	1.9	1.9	107.76	0.0010309	0.78843	57222000	2	Q8K4M9	Q8K4M9	Oxysterol-binding protein-related protein 1	Osbpl1a
NaN	27.439	NaN	26.9148	26.687	NaN	NaN	NaN				5	5	5	9.3	9.3	9.3	61.014	0.0010137	0.54892	246520000	7	Q8K4V4	Q8K4V4	Sorting nexin-27	Snx27
24.6259	25.0395	24.3537	NaN	23.2341	NaN	24.2982	NaN				2	2	2	9.7	9.7	9.7	26.272	0.0061495	-0.46803	88145000	8	Q8K581	Q8K581	Thioredoxin domain-containing protein 9	Txndc9
27.6553	NaN	27.8938	NaN	27.3759	NaN	27.3796	NaN				6	6	6	39.5	39.5	39.5	24.399	0	10.333	829830000	16	Q8K5A9	Q8K5A9	Death domain-containing membrane protein NRADD	Nradd
24.8579	NaN	25.0246	NaN	NaN	NaN	NaN	NaN				2	2	2	28.3	28.3	28.3	16.148	0	2.0466	92862000	3	Q8K5B3	Q8K5B3	Multiple coagulation factor deficiency protein 2 homolog	Mcfd2
NaN	NaN	NaN	NaN	NaN	NaN	NaN	29.8636				3	3	3	9.2	9.2	9.2	48.511	0.0038517	-0.21239	55596000	3	Q8R424	Q8R424	STAM-binding protein	Stambp
29.8578	27.1818	29.744	27.9441	27.3822	NaN	28.0394	26.1889				20	12	12	51	30.8	30.8	60.79	0	57.769	2680200000	41	Q8R491	Q8R491	EH domain-containing protein 3	Ehd3
29.1976	29.698	29.8555	30.7325	29.921	29.0794	30.13	30.4025				17	17	17	57.8	57.8	57.8	54.018	0	192.66	4501600000	70	Q8R4A1	Q8R4A1	ERO1-like protein alpha	Ero1l
28.2878	29.1738	27.8988	28.7179	NaN	NaN	28.4616	NaN				6	6	6	11	11	11	71.292	0	7.831	1460900000	9	Q8R511	Q8R511	Formin-binding protein 1	Fnbp1
25.6005	NaN	26.2595	NaN	NaN	NaN	25.5015	NaN				4	4	4	17.9	17.9	17.9	35.214	0	5.7119	195850000	5	Q8VD48	Q8VD48	Dehydrogenase/reductase SDR family member 9	Dhrs9
26.3925	NaN	25.8934	NaN	26.0668	NaN	25.1453	NaN				5	5	5	8.8	8.8	8.8	80.751	0	5.7385	230300000	7	Q8VH46	Q8VH46	Actin filament-associated protein 1	Afap1
28.1899	28.494	28.2683	28.6746	29.428	NaN	28.4269	29.4772				10	10	10	18.1	18.1	18.1	67.53	0	11.321	1637400000	33	Q8VHE9	Q8VHE9	All-trans-retinol 13,14-reductase	Retsat
31.3158	31.731	31.0581	31.8753	31.5089	30.4861	31.1528	31.8273				12	12	12	24.9	24.9	24.9	51.866	0	16.061	9115300000	73	Q8VHF5	Q8VHF5	Citrate synthase, mitochondrial	Cs
28.621	27.6326	28.73	27.4732	29.2592	27.8799	28.7896	NaN				7	7	6	27	27	23.6	26.488	0	17.631	1732600000	30	Q8VHK7	Q8VHK7	Hepatoma-derived growth factor	Hdgf
27.4237	26.9589	27.7146	26.6167	26.5564	NaN	26.895	NaN				11	11	11	9.9	9.9	9.9	149.17	0	14.724	651520000	21	Q8VHU4	Q8VHU4	Elongator complex protein 1	Ikbkap
29.285	26.741	29.1204	27.2971	27.8743	26.5398	28.4832	25.9724				11	6	6	35.6	17.4	17.4	49.188	0	20.145	2079700000	21	Q8VHV7	Q8VHV7	Heterogeneous nuclear ribonucleoprotein H;Heterogeneous nuclear ribonucleoprotein H, N-terminally processed	Hnrnph1
NaN	NaN	NaN	NaN	NaN	NaN	NaN	27.5046				2	2	2	14.2	14.2	14.2	21.385	0.0019831	0.19373	167160000	4	Q8VHV8	Q8VHV8	Selenoprotein S	Vimp
26.5621	27.0906	26.8274	27.3613	26.9284	NaN	27.045	NaN				7	7	7	8.7	8.7	8.7	105.61	0	14.947	525750000	15	Q8VI02	Q8VI02	Serine/threonine-protein phosphatase 4 regulatory subunit 1	Ppp4r1
NaN	NaN	24.6852	NaN	NaN	NaN	NaN	NaN				2	2	2	5.1	5.1	5.1	80.686	0.0070621	-0.5945	54709000	2	Q8VIB2	Q8VIB2	Death domain-associated protein 6	Daxx
24.4464	NaN	24.5856	NaN	NaN	NaN	NaN	NaN				2	2	2	7.5	7.5	7.5	29.821	0.0014993	0.32652	73257000	2	Q8VID1	Q8VID1	Dehydrogenase/reductase SDR family member 4	Dhrs4
28.9148	NaN	28.3658	NaN	27.7378	NaN	27.1131	NaN				13	13	13	38.8	38.8	38.8	52.531	0	43.981	1296600000	31	Q8VIF7	Q8VIF7	Selenium-binding protein 1	Selenbp1
25.9969	25.2311	26.0079	25.5729	NaN	NaN	25.6864	NaN				4	4	4	5.8	5.8	5.8	102.92	0	17.987	234030000	9	Q8VIJ5	Q8VIJ5	Protein O-GlcNAcase	Mgea5
NaN	NaN	24.6813	NaN	NaN	NaN	23.9014	NaN				2	2	2	14.3	14.3	14.3	30.142	0	2.3836	60341000	2	Q8VIL3	Q8VIL3	ZW10 interactor	Zwint
30.8145	29.9869	30.6066	29.8243	30.3913	31.7536	30.2715	NaN				4	4	4	12	12	12	48.315	0	34.31	2848000000	26	Q91V33;Q9JLP1;Q920F3	Q91V33	KH domain-containing, RNA-binding, signal transduction-associated protein 1	Khdrbs1
NaN	NaN	24.1018	NaN	NaN	NaN	NaN	NaN				3	3	3	18.1	18.1	18.1	42.132	0	4.0543	60948000	2	Q91XS8	Q91XS8	Serine/threonine-protein kinase 17B	Stk17b
27.8065	27.5125	27.4705	26.9215	27.387	NaN	27.0161	27.6453				7	7	7	21.7	21.7	21.7	37.642	0	6.2767	705760000	18	Q91XU1	Q91XU1	Protein quaking	Qki
NaN	NaN	NaN	25.0413	NaN	NaN	25.3376	NaN				2	2	2	7	7	7	51.322	0.0057197	-0.34862	120470000	2	Q91XU8	Q91XU8	Phosphatidate cytidylyltransferase 2	Cds2
27.8013	28.6454	27.8157	28.152	28.0771	27.7622	28.2021	28.4491				8	8	8	46.5	46.5	46.5	26.123	0	30.425	1306800000	24	Q91Y78	Q91Y78	Ubiquitin carboxyl-terminal hydrolase isozyme L3	Uchl3
31.1974	30.3709	31.3614	30.5582	30.7775	29.047	30.7032	29.7309				15	15	15	54.8	54.8	54.8	41.592	0	126.04	8560400000	85	Q91Y81	Q91Y81	Septin-2	2018-09-02
28.1832	NaN	28.4623	NaN	27.9881	NaN	27.6362	NaN				6	6	6	38.4	38.4	38.4	20.17	0	20.809	1187700000	13	Q91Y94	Q91Y94	Cytochrome c oxidase subunit 4 isoform 2, mitochondrial	Cox4i2
NaN	NaN	23.2162	NaN	NaN	NaN	NaN	NaN				2	2	2	2.1	2.1	2.1	118	0.00053533	1.4461	22351000	1	Q91Z80;Q9R0A8	Q91Z80;Q9R0A8	Liprin-alpha-4;HAUS augmin-like complex subunit 1	Ppfia4;Haus1
29.0523	32.5174	29.2106	32.5732	30.9538	32.2714	30.636	32.5271				13	13	13	28.2	28.2	28.2	51.065	0	20.309	5763100000	54	Q91ZN1	Q91ZN1	Coronin-1A	Coro1a
NaN	NaN	25.2777	NaN	NaN	NaN	NaN	NaN				2	2	2	11.3	11.3	11.3	45.9	0	47.396	137200000	3	Q91ZQ0	Q91ZQ0	Vacuole membrane protein 1	Vmp1
27.3851	26.9252	26.7402	NaN	27.0548	NaN	26.4769	NaN				6	6	6	19.4	19.4	19.4	42.075	0.0092894	-0.74549	412300000	8	Q91ZS3	Q91ZS3	45 kDa calcium-binding protein	Sdf4
30.5289	30.0411	30.3347	29.801	30.2438	29.5187	30.5252	28.9191				8	8	8	22.8	22.8	22.8	51.174	0	47.263	4239300000	66	Q920A6	Q920A6	Retinoid-inducible serine carboxypeptidase	Scpep1
26.9131	27.5681	26.896	27.4573	25.4396	NaN	26.6976	NaN				5	5	5	33.2	33.2	33.2	21.638	0	9.0532	500380000	12	Q920D2	Q920D2	Dihydrofolate reductase	Dhfr
25.0992	28.9601	26.1637	29.7168	26.577	27.0528	27.2638	26.4586				6	6	6	19.8	19.8	19.8	40.717	0	4.3004	599330000	18	Q920G0	Q920G0	Src kinase-associated phosphoprotein 2	Skap2
26.2948	NaN	25.8917	NaN	NaN	NaN	NaN	NaN				5	5	5	17.2	17.2	17.2	37.368	0	18.698	208680000	7	Q920G2	Q920G2	Na(+)/H(+) exchange regulatory cofactor NHE-RF2	Slc9a3r2
29.339	29.908	29.4903	29.7675	29.7905	28.5703	29.0539	28.7831				10	10	10	52.2	52.2	52.2	32.249	0	92.619	3041000000	52	Q920J4	Q920J4	Thioredoxin-like protein 1	Txnl1
28.8219	29.6298	28.788	29.0799	29.499	29.794	28.867	29.4715				15	15	15	31.4	31.4	31.4	71.614	0	66.541	2169000000	37	Q920L2	Q920L2	Succinate dehydrogenase [ubiquinone] flavoprotein subunit, mitochondrial	Sdha
NaN	NaN	NaN	25.4171	NaN	NaN	NaN	NaN				5	5	5	21.3	21.3	21.3	25.719	0.00054171	1.6025	55962000	4	Q920P0	Q920P0	L-xylulose reductase	Dcxr
27.4616	30.2432	27.6186	30.2048	29.0655	28.6553	28.936	29.6686				12	12	12	39.8	39.8	39.8	39.899	0	25.918	1768800000	42	Q920P6	Q920P6	Adenosine deaminase	Ada
26.9643	28.1848	27.5839	28.2528	28.2991	29.1397	27.376	27.4677				3	3	3	12	12	12	32.786	0	3.0863	349920000	14	Q923V4	Q923V4	F-box only protein 6	Fbxo6
27.4102	26.711	27.7296	27.1271	24.7076	NaN	27.3837	NaN				3	3	3	25.3	25.3	25.3	17.822	0	8.1049	669680000	15	Q923V8	Q923V8	15 kDa selenoprotein	2018-09-15
25.039	NaN	25.1924	NaN	24.2941	NaN	24.621	NaN				2	1	1	11.9	7.9	7.9	22.446	0.00052938	1.2963	131330000	5	Q923W4	Q923W4	Hepatoma-derived growth factor-related protein 3	Hdgfrp3
25.544	26.5371	NaN	NaN	26.0806	NaN	24.7252	NaN				4	4	4	6.6	6.6	6.6	73.744	0.0010455	1.0413	163640000	4	Q924K2	Q924K2	FAS-associated factor 1	Faf1
NaN	27.9988	NaN	27.9853	NaN	NaN	NaN	NaN				7	7	7	11.8	11.8	11.8	80.518	0	12.194	180730000	10	Q924N5	Q924N5	Long-chain-fatty-acid--CoA ligase ACSBG1	Acsbg1
26.6065	24.6944	26.8419	NaN	24.7446	NaN	25.6267	NaN				6	6	6	18.5	18.5	18.5	43.794	0	4.1306	289940000	9	Q924S1	Q924S1	1-acyl-sn-glycerol-3-phosphate acyltransferase delta	Agpat4
28.8313	29.1115	28.7996	29.4486	28.6114	NaN	28.8985	28.6456				17	17	17	24.7	24.7	24.7	105.79	0	24.292	2062100000	46	Q924S5	Q924S5	Lon protease homolog, mitochondrial	Lonp1
NaN	NaN	NaN	26.4249	NaN	NaN	NaN	NaN				2	2	2	4.8	4.8	4.8	64.593	0	4.5539	44111000	2	Q924V4	Q924V4	Solute carrier family 15 member 3	Slc15a3
NaN	26.5087	NaN	NaN	NaN	NaN	NaN	NaN				2	2	2	9.5	9.5	9.5	28.485	0	2.1658	32485000	2	Q925D4	Q925D4	Transmembrane protein 176B	Tmem176b
NaN	NaN	27.9964	NaN	NaN	NaN	NaN	NaN				2	2	2	15.5	15.5	15.5	16.855	0	3.0678	1041100000	5	Q925G0	Q925G0	RNA-binding protein 3	Rbm3
25.6276	NaN	25.3148	NaN	NaN	NaN	25.8632	NaN				3	2	2	4.5	3.3	3.3	74.017	0	3.0597	158750000	4	Q925G1	Q925G1	Hepatoma-derived growth factor-related protein 2	Hdgfrp2
25.8919	NaN	25.8375	NaN	26.2525	NaN	25.9106	NaN				4	4	4	6.3	6.3	6.3	79.866	0	6.5879	226520000	10	Q925S8	Q925S8	ATP-dependent zinc metalloprotease YME1L1	Yme1l1
29.9163	28.7545	30.0536	28.6046	30.0469	28.6156	29.9445	28.5973				12	12	12	35.3	35.3	35.3	42.031	0	35.793	3710800000	41	Q99068	Q99068	Alpha-2-macroglobulin receptor-associated protein	Lrpap1
27.384	26.7811	26.8559	26.5129	29.0192	28.1368	28.4958	NaN				9	9	9	15.3	15.3	15.3	70.152	0	2.7781	404340000	13	Q99376	Q99376	Transferrin receptor protein 1	Tfrc
30.5715	29.0439	30.6319	29.049	30.2467	28.1707	29.5327	29.1165				15	15	15	40	40	40	51.373	0	44.88	5802200000	55	Q99J82	Q99J82	Integrin-linked protein kinase	Ilk
24.9267	NaN	25.6488	24.6643	NaN	NaN	24.7082	NaN				3	3	3	2.5	2.5	2.5	140.64	0	2.0409	150900000	4	Q99JD4	Q99JD4	CLIP-associating protein 2	Clasp2
26.1669	26.2279	26.1791	26.1074	NaN	NaN	26.0707	NaN				6	6	6	6	6	6	139.45	0	3.8461	285300000	9	Q99JE6	Q99JE6	1-phosphatidylinositol 4,5-bisphosphate phosphodiesterase beta-3	Plcb3
27.2112	27.7917	27.0813	NaN	NaN	NaN	27.3742	NaN				7	7	7	19.7	19.7	19.7	57.55	0	16.858	654560000	10	Q99M63	Q99M63	WD40 repeat-containing protein SMU1;WD40 repeat-containing protein SMU1, N-terminally processed	Smu1
27.2305	27.6571	27.2873	27.4092	28.1637	NaN	27.9208	NaN				12	12	12	26.4	26.4	26.4	54.304	0	17.049	1107700000	24	Q99M64	Q99M64	Phosphatidylinositol 4-kinase type 2-alpha	Pi4k2a
26.5211	24.8102	25.9997	24.9444	NaN	NaN	26.1533	NaN				5	5	5	18	18	18	51.723	0	6.82	299610000	7	Q99MI7	Q99MI7	NEDD8-activating enzyme E1 catalytic subunit	Uba3
30.3951	29.5846	30.3275	29.1109	29.5409	28.7834	28.9932	26.9543				12	12	12	39.7	39.7	39.7	56.287	0	95.203	4068200000	56	Q99ML5	Q99ML5	Prenylcysteine oxidase	Pcyox1
24.259	NaN	24.1702	NaN	NaN	NaN	NaN	NaN				2	2	2	3.3	3.3	3.3	70.382	0.0010272	0.75436	51736000	2	Q99MZ4	Q99MZ4	Gamma-glutamyltransferase 7;Gamma-glutamyltransferase 7 heavy chain;Gamma-glutamyltransferase 7 light chain	Ggt7
29.1154	28.24	29.8193	28.813	29.1412	NaN	29.1141	30.8046				5	5	5	22.8	22.8	22.8	29.97	0	13.648	1927000000	20	Q99MZ8	Q99MZ8	LIM and SH3 domain protein 1	Lasp1
28.9786	30.6356	29.6881	30.6231	30.7699	30.2681	29.9217	30.5963				15	15	15	33.7	33.7	33.7	59.044	0	36.268	3488400000	62	Q99N27	Q99N27	Sorting nexin-1	Snx1
26.3685	26.7905	25.9345	26.9573	25.5675	NaN	26.1651	NaN				6	6	6	11.4	11.4	11.4	93.753	0	10.594	334580000	12	Q99N37	Q99N37	Rho GTPase-activating protein 17	Arhgap17
29.0172	28.9762	28.7592	28.8536	29.4064	29.476	28.8763	29.6607				10	10	10	32.2	32.2	32.2	39.613	0	41.836	2393900000	43	Q99NA5	Q99NA5	Isocitrate dehydrogenase [NAD] subunit alpha, mitochondrial	Idh3a
26.1995	25.4048	26.2375	24.8169	25.5868	25.5107	25.0773	NaN				3	3	3	7.8	7.8	7.8	27.782	0.00053821	1.4885	217940000	6	Q99ND9	Q99ND9	RWD domain-containing protein 1	Rwdd1
25.683	NaN	24.9906	25.2214	NaN	NaN	25.2558	NaN				3	3	3	8.2	8.2	8.2	50.012	0	2.4847	159800000	3	Q99P39	Q99P39	Cysteine desulfurase, mitochondrial	Nfs1
24.2973	NaN	NaN	NaN	NaN	NaN	NaN	NaN				2	2	2	7.4	7.4	7.4	49.441	0	2.3371	39875000	2	Q99P63	Q99P63	Calcium uptake protein 2, mitochondrial	Micu2
NaN	NaN	22.6091	NaN	NaN	NaN	NaN	NaN				2	1	1	8.7	5	5	24.62	0.0038499	-0.21312	10749000	1	Q99P74	Q99P74	Ras-related protein Rab-27B	Rab27b
26.9492	28.1392	27.4434	28.0024	27.8523	NaN	27.4623	NaN				5	5	5	33.3	33.3	33.3	22.895	0	12.414	583310000	12	Q99P75	Q99P75	Ras-related protein Rab-9A	Rab9a
25.1864	25.1809	25.2869	25.1256	25.5543	NaN	25.5179	NaN				4	4	4	6.8	6.8	6.8	74.287	0.00054259	1.6368	177780000	5	Q99P77	Q99P77	Nucleolar GTP-binding protein 1	Gtpbp4
26.5698	NaN	26.4393	26.2485	NaN	NaN	NaN	NaN				6	5	5	27.3	21.1	21.1	41.599	0	16.226	294440000	11	Q99PD4	Q99PD4	Actin-related protein 2/3 complex subunit 1A	Arpc1a
29.8515	23.6425	29.4042	NaN	27.6544	NaN	27.1069	NaN				16	16	16	43.4	43.4	43.4	50.122	0	20.124	2198800000	36	Q99PD6	Q99PD6	Transforming growth factor beta-1-induced transcript 1 protein	Tgfb1i1
29.1079	28.0177	29.5108	27.8612	29.0213	NaN	28.7504	27.6879				15	14	14	29.1	27.2	27.2	74.226	0	35.349	2516100000	31	Q99PF5	Q99PF5	Far upstream element-binding protein 2	Khsrp
31.114	30.5407	30.475	29.8014	29.985	30.4855	31.2479	29.7513				8	8	8	24.2	24.2	24.2	55.114	0	146.95	6113900000	53	Q9EPB1	Q9EPB1	Dipeptidyl peptidase 2	Dpp7
26.321	NaN	26.3651	NaN	26.28	NaN	25.785	NaN				6	6	6	14.2	14.2	14.2	71.326	0	5.0794	296590000	7	Q9EPF2	Q9EPF2	Cell surface glycoprotein MUC18	Mcam
27.5569	27.0096	27.9045	27.369	29.0606	NaN	28.428	28.9446				2	2	2	14.1	14.1	14.1	19.847	0	8.2891	907050000	10	Q9EPH2	Q9EPH2	MARCKS-related protein	Marcksl1
31.5663	31.0205	31.9009	31.4222	30.6592	29.7418	31.4081	30.1699				23	23	23	44.3	44.3	44.3	70.7	0	161.58	13644000000	146	Q9EPH8	Q9EPH8	Polyadenylate-binding protein 1	Pabpc1
NaN	NaN	NaN	NaN	NaN	NaN	18.8926	NaN				2	2	2	3.3	3.3	3.3	60.612	0	1.7412	10525000	3	Q9EQ25	Q9EQ25	Sodium-coupled neutral amino acid transporter 4	Slc38a4
27.704	27.0398	27.7073	27.2354	27.0009	NaN	27.1029	NaN				6	6	4	17.3	17.3	13	48.986	0	19.799	800850000	26	Q9EQH5	Q9EQH5	C-terminal-binding protein 2	Ctbp2
28.2082	28.5413	28.5168	28.6702	28.8599	27.1295	28.9804	NaN				11	11	11	25.8	25.8	25.8	71.587	0	22.117	949480000	36	Q9EQR2	Q9EQR2	Alkyldihydroxyacetonephosphate synthase, peroxisomal	Agps
31.8016	32.7316	31.7707	33.0994	33.1973	32.8551	32.6647	33.035				11	11	11	30.9	30.9	30.9	37.46	0	17.918	21371000000	97	Q9EQS0	Q9EQS0	Transaldolase	Taldo1
26.0692	NaN	26.8014	NaN	NaN	NaN	NaN	NaN				3	3	3	8.7	8.7	8.7	61.332	0	5.9018	332010000	8	Q9EQV6	Q9EQV6	Tripeptidyl-peptidase 1	Tpp1
30.2965	31.1348	30.194	31.1403	29.2789	30.216	29.9567	30.0536				6	6	6	46.7	46.7	46.7	17.124	0	80.246	5477100000	36	Q9EQX9	Q9EQX9	Ubiquitin-conjugating enzyme E2 N	Ube2n
30.7015	29.3426	30.0474	28.5639	29.934	NaN	29.4199	27.7631				17	17	17	47.4	47.4	47.4	53.726	0	68.174	5369100000	41	Q9ER24	Q9ER24	Ataxin-10	Atxn10
31.7231	31.7911	31.7224	31.5921	31.81	30.9604	31.3554	30.9883				27	27	27	46	46	46	85.432	0	149.52	12004000000	166	Q9ER34	Q9ER34	Aconitate hydratase, mitochondrial	Aco2
25.611	26.0095	25.8283	25.508	25.1697	NaN	25.8794	NaN				4	4	4	19.1	19.1	19.1	33.779	0	3.7014	223240000	13	Q9ERE4	Q9ERE4	Golgi phosphoprotein 3	Golph3
29.3821	26.691	28.7895	NaN	27.5683	27.2543	27.4679	26.7253				22	22	22	27.3	27.3	27.3	117.11	0	61.554	1867900000	39	Q9ERE6	Q9ERE6	Myosin phosphatase Rho-interacting protein	Mprip
NaN	26.5079	24.5683	26.5371	26.3428	NaN	25.3535	NaN				4	4	4	3.6	3.6	3.6	163.19	0.00054025	1.5654	156890000	5	Q9ERH3	Q9ERH3	WD repeat-containing protein 7	Wdr7
24.983	25.2306	NaN	25.2302	24.5644	NaN	25.3145	NaN				2	2	2	12.1	12.1	12.1	24.453	0.0010045	0.45659	107230000	3	Q9ERR2	Q9ERR2	COMM domain-containing protein 5	Commd5
29.902	29.6959	30.2445	30.1234	29.962	29.0301	30.3231	30.7753				20	20	20	39.9	39.9	39.9	67.038	0	53.539	4749900000	64	Q9ES21	Q9ES21	Phosphatidylinositide phosphatase SAC1	Sacm1l
28.23	27.3197	28.2149	26.9051	NaN	NaN	29.1776	NaN				4	4	4	21.3	21.3	21.3	21.548	0	32.585	1007400000	14	Q9ES40	Q9ES40	PRA1 family protein 3	Arl6ip5
25.9939	26.5218	26.3358	26.3064	25.0395	NaN	25.8883	NaN				6	6	6	23.5	23.5	23.5	34.485	0	11.626	317900000	16	Q9ES53	Q9ES53	Ubiquitin fusion degradation protein 1 homolog	Ufd1l
28.1397	28.4725	28.2115	28.4417	28.4112	NaN	27.8653	NaN				11	11	11	24	24	24	68.055	0	11.358	1246200000	31	Q9ES54	Q9ES54	Nuclear protein localization protein 4 homolog	Nploc4
25.8573	NaN	26.5168	NaN	26.4018	NaN	NaN	NaN				2	2	2	3	3	3	85.797	0.00052798	1.2529	245220000	3	Q9ES73	Q9ES73	Melanoma-associated antigen D1	Maged1
28.2039	28.9818	28.3417	29.3345	NaN	NaN	29.0244	NaN				4	4	4	43.9	43.9	43.9	11.879	0	55.447	1409700000	21	Q9ESH6	Q9ESH6	Glutaredoxin-1	Glrx
31.2207	27.5726	30.7454	28.927	30.6362	NaN	30.4569	28.3424				25	25	25	35.4	35.4	35.4	103.46	0	98.602	7406300000	63	Q9ESN0	Q9ESN0	Protein Niban	Fam129a
30.0312	29.4282	30.0274	29.6651	29.2931	NaN	30.0657	28.8798				6	6	6	25.7	25.7	25.7	31.06	0	46.024	4391700000	53	Q9EST6	Q9EST6	Acidic leucine-rich nuclear phosphoprotein 32 family member B	Anp32b
29.7284	28.1718	29.3015	27.6838	28.9573	28.2645	28.8181	27.3755				21	21	21	20.6	20.6	20.6	126.86	0	45.171	2744200000	49	Q9ESW0	Q9ESW0	DNA damage-binding protein 1	Ddb1
25.435	25.7071	25.1268	25.7532	NaN	NaN	25.5804	NaN				3	3	3	8.5	8.5	8.5	47.644	0	16.943	194960000	11	Q9ET64	Q9ET64	Sphingomyelin phosphodiesterase 2	Smpd2
29.7848	26.2677	29.2038	27.8748	27.9542	NaN	27.8952	NaN				8	8	8	25.3	25.3	25.3	42.291	0	26.393	2387700000	31	Q9HB97	Q9HB97	Alpha-parvin	Parva
26.1717	NaN	26.1897	25.9082	26.2066	NaN	25.7207	26.2846				5	5	5	23.4	23.4	23.4	33.005	0	2.4864	241690000	12	Q9JHB5	Q9JHB5	Translin-associated protein X	Tsnax
28.1366	29.2321	28.4233	28.5822	28.5294	28.3981	28.1679	28.4028				9	9	9	30.5	30.5	30.5	48.612	0	73.404	1405600000	28	Q9JHL4	Q9JHL4	Drebrin-like protein	Dbnl
26.9322	27.415	26.8102	27.0976	27.1468	NaN	26.8733	26.8816				6	6	6	19.9	19.9	19.9	40.779	0	2.8836	615860000	12	Q9JHU5	Q9JHU5	Arfaptin-1	Arfip1
28.9241	28.8661	28.8711	29.1361	29.117	NaN	28.9759	NaN				5	5	5	26.4	26.4	26.4	29.927	0	44.884	1872400000	19	Q9JHW0	Q9JHW0	Proteasome subunit beta type-7	Psmb7
25.5788	23.9669	24.4059	23.8241	24.0327	NaN	23.8805	NaN				3	3	3	2.2	2.2	2.2	152.61	0	4.3252	108740000	4	Q9JHW1	Q9JHW1	Carboxypeptidase D	Cpd
27.4881	27.9448	27.1723	27.8932	27.9457	NaN	27.5003	NaN				4	4	4	18.6	18.6	18.6	24.775	0	4.9477	685000000	14	Q9JHW5	Q9JHW5	Vesicle-associated membrane protein 7	Vamp7
NaN	25.8883	26.0302	26.0282	25.7119	NaN	26.081	NaN				6	6	6	16.4	16.4	16.4	55.338	0	5.2908	235790000	6	Q9JHX4	Q9JHX4	Caspase-8;Caspase-8 subunit p18;Caspase-8 subunit p10	Casp8
28.3694	28.5271	28.5178	29.067	28.137	27.2316	28.9517	NaN				7	7	7	28.7	28.7	28.7	35.433	0	28.156	1704200000	36	Q9JHY2	Q9JHY2	Sideroflexin-3	Sfxn3
NaN	NaN	NaN	25.9835	NaN	NaN	NaN	NaN				2	2	2	2.5	2.5	2.5	96.073	0	2.195	122620000	2	Q9JHZ4	Q9JHZ4	GRIP1-associated protein 1	Gripap1
28.7287	27.169	27.3066	25.9937	28.398	NaN	26.9653	27.6463				14	11	11	10.9	9.1	9.1	183.98	0	45.232	728650000	17	Q9JI03	Q9JI03	Collagen alpha-1(V) chain	Col5a1
30.5395	30.3766	30.5061	29.6472	30.6799	29.5373	30.3531	31.3196				16	16	16	46.9	46.9	46.9	50.09	0	189.61	6407800000	75	Q9JI85	Q9JI85	Nucleobindin-2;Nesfatin-1	Nucb2
27.2854	27.057	27.0893	26.7927	26.56	NaN	26.5125	NaN				6	6	6	30.3	30.3	30.3	32.423	0	56.142	593750000	15	Q9JI92	Q9JI92	Syntenin-1	Sdcbp
26.931	26.4869	26.3759	26.1608	26.7071	NaN	26.5797	NaN				9	5	5	31.5	18.4	18.4	42.026	0	2.0619	427440000	7	Q9JID2	Q9JID2	Guanine nucleotide-binding protein subunit alpha-11	Gna11
26.1844	26.4611	25.9162	26.3413	25.7542	NaN	26.1617	NaN				4	4	4	2.3	2.3	2.3	225.11	0	3.6388	270390000	5	Q9JIH7;Q7TPK6	Q9JIH7;Q7TPK6	Serine/threonine-protein kinase WNK1;Serine/threonine-protein kinase WNK4	Wnk1;Wnk4
29.5003	27.9929	29.3028	28.2053	27.793	27.7394	29.174	NaN				15	15	15	21.6	21.6	21.6	95.934	0	47.401	2179700000	38	Q9JIL3;Q9JKU6	Q9JIL3	Interleukin enhancer-binding factor 3	Ilf3
NaN	NaN	26.1747	NaN	NaN	NaN	NaN	NaN				2	2	2	1.5	1.5	1.5	153.78	0.0093414	-0.69887	142810000	2	Q9JIL8	Q9JIL8	DNA repair protein RAD50	Rad50
25.27	NaN	25.4311	25.1475	NaN	NaN	25.2015	NaN				2	2	1	0.7	0.7	0.3	290.69	0.0047893	-0.28281	141110000	3	Q9JIX5	Q9JIX5	Chromodomain-helicase-DNA-binding protein 8	Chd8
27.946	29.1651	28.8935	28.868	29.2073	28.5899	29.52	NaN				11	11	11	39	39	39	38.83	0	27.539	1827900000	40	Q9JJ19	Q9JJ19	Na(+)/H(+) exchange regulatory cofactor NHE-RF1	Slc9a3r1
29.4827	28.5271	30.7293	29.2003	29.3336	28.045	29.5726	27.7333				21	21	21	27.7	27.7	27.7	106.42	0	175.85	4384200000	46	Q9JJ22	Q9JJ22	Endoplasmic reticulum aminopeptidase 1	Erap1
27.601	27.4073	27.4854	27.5314	27.6457	NaN	27.3183	27.6155				10	10	10	14.5	14.5	14.5	90.889	0	7.9845	817420000	23	Q9JJ31	Q9JJ31	Cullin-5	Cul5
26.2143	NaN	26.0578	26.0903	NaN	NaN	NaN	NaN				2	2	2	9.6	9.6	9.6	26.737	0.0010357	0.86931	265020000	5	Q9JJ46	Q9JJ46	3-beta-hydroxysteroid-Delta(8),Delta(7)-isomerase	Ebp
28.1612	27.5786	28.0245	27.8806	28.2542	28.5578	27.7636	28.6057				9	9	9	12.2	12.2	12.2	86.245	0	12.809	1328900000	24	Q9JJ50	Q9JJ50	Hepatocyte growth factor-regulated tyrosine kinase substrate	Hgs
31.3693	28.8651	31.3017	29.4072	29.5861	NaN	30.6004	27.748				8	8	7	22.7	22.7	20.4	38.218	0	78.663	6780700000	49	Q9JJ54	Q9JJ54	Heterogeneous nuclear ribonucleoprotein D0	Hnrnpd
28.2919	NaN	28.031	NaN	28.2559	NaN	27.8438	NaN				5	5	5	14.6	14.6	14.6	42.852	0.0010466	1.0782	876190000	6	Q9JJM9	Q9JJM9	Septin-5	2018-09-05
24.604	NaN	25.9318	NaN	NaN	NaN	NaN	NaN				3	3	3	7.6	7.6	7.6	62.071	0	42.964	134960000	7	Q9JJP9	Q9JJP9	Ubiquilin-1	Ubqln1
28.7624	29.305	28.7447	29.1666	29.0265	NaN	28.8839	NaN				2	2	2	43.1	43.1	43.1	6.4075	0	13.619	1740500000	17	Q9JJW3	Q9JJW3	Up-regulated during skeletal muscle growth protein 5	Usmg5
29.9639	29.9114	30.0218	30.4834	30.2075	NaN	29.8844	NaN				8	8	8	12.1	12.1	12.1	126.39	0	36.016	4764500000	56	Q9JK11	Q9JK11	Reticulon-4	Rtn4
NaN	24.9374	NaN	24.7613	NaN	NaN	NaN	NaN				2	2	2	7.2	7.2	7.2	43.523	0.0024716	0.17171	28431000	3	Q9JK15	Q9JK15	Arf-GAP with dual PH domain-containing protein 2	Adap2
NaN	NaN	NaN	NaN	NaN	NaN	25.2997	NaN				2	2	2	1.6	1.6	1.6	148.28	0.009311	-0.72052	74651000	3	Q9JK25	Q9JK25		Clip1
27.7381	28.1314	27.5601	28.3526	27.8637	NaN	28.0872	NaN				2	2	2	16	16	16	21.129	0	15.511	970600000	15	Q9JK41	Q9JK41	High affinity copper uptake protein 1	Slc31a1
26.1402	26.5841	26.4511	25.9713	26.8076	NaN	26.2459	NaN				3	3	3	10.2	10.2	10.2	28.889	0	3.1309	252510000	4	Q9JK72	Q9JK72	Copper chaperone for superoxide dismutase	Ccs
25.7923	26.6714	NaN	27.9233	26.6854	NaN	26.3592	26.187				6	6	6	23	23	23	37.634	0	8.5682	223860000	11	Q9JL55	Q9JL55	Glycerophosphodiester phosphodiesterase 1	Gde1
30.9579	30.577	31.2562	30.6145	31.1859	30.0926	30.9109	30.5156				44	44	44	41	41	41	176.43	0	211.93	9012600000	131	Q9JLA3	Q9JLA3	UDP-glucose:glycoprotein glucosyltransferase 1	Uggt1
26.5884	26.7941	26.6178	26.767	26.738	NaN	26.5516	NaN				8	8	8	14.7	14.7	14.7	57.044	0	13.157	448700000	22	Q9JLH7	Q9JLH7	CDK5 regulatory subunit-associated protein 3	Cdk5rap3
31.8281	30.7755	31.9389	30.5089	31.581	30.74	31.7188	31.4024				21	21	21	45.3	45.3	45.3	53.652	0	82.313	12772000000	87	Q9JLJ3	Q9JLJ3	4-trimethylaminobutyraldehyde dehydrogenase	Aldh9a1
NaN	NaN	NaN	NaN	NaN	NaN	NaN	26.2579				2	1	1	1.4	0.7	0.7	138.75	0.0019822	0.18876	45710000	2	Q9JLS3	Q9JLS3	Serine/threonine-protein kinase TAO2	Taok2
34.5763	30.6	34.2835	31.6637	34.4678	31.8721	33.1652	29.9657				93	83	80	49.1	43.9	43	228.96	0	323.31	66267000000	469	Q9JLT0	Q9JLT0	Myosin-10	Myh10
NaN	28.061	26.9347	29.2021	NaN	NaN	27.2944	NaN				3	3	3	27	27	27	22.249	0	41.958	539870000	11	Q9JLT6	Q9JLT6	BH3-interacting domain death agonist;BH3-interacting domain death agonist p15;BH3-interacting domain death agonist p13;BH3-interacting domain death agonist p11	Bid
28.8999	29.775	29.0715	29.0834	29.1728	28.3888	28.5808	27.3467				12	12	12	43.6	43.6	43.6	37.849	0	99.701	2467900000	43	Q9JLZ1	Q9JLZ1	Glutaredoxin-3	Glrx3
24.683	NaN	25.0711	NaN	NaN	NaN	24.7267	NaN				4	4	4	5.6	5.6	5.6	108.19	0.0024594	0.12173	120290000	4	Q9JM04	Q9JM04	Importin-13	Ipo13
27.1645	27.9892	27.1218	27.025	27.4911	NaN	27.6508	NaN				8	8	8	18.1	18.1	18.1	66.722	0	15.672	623460000	15	Q9JM53	Q9JM53	Apoptosis-inducing factor 1, mitochondrial	Aifm1
25.5028	25.2029	26.034	NaN	NaN	NaN	26.0212	NaN				3	3	3	12.3	12.3	12.3	42.102	0	41.373	218420000	7	Q9JMB5	Q9JMB5	Proteasomal ubiquitin receptor ADRM1	Adrm1
26.5722	25.8959	26.8775	26.5894	25.3697	NaN	25.9112	NaN				7	7	7	11.6	11.6	11.6	75.039	0	5.6922	321220000	11	Q9JMI1	Q9JMI1	Acetoacetyl-CoA synthetase	Aacs
29.4138	28.8304	29.6489	28.6031	29.4407	NaN	29.3385	29.1846				12	12	12	44	44	44	55.238	0	82.051	2818300000	39	Q9JMJ4	Q9JMJ4	Pre-mRNA-processing factor 19	Prpf19
29.647	29.5728	29.55	29.6682	29.7868	28.691	29.591	29.1127				19	19	19	27	27	27	82.652	0	29.597	3142000000	73	Q9QUL6	Q9QUL6	Vesicle-fusing ATPase	Nsf
26.9638	26.0545	26.5741	26.7038	26.1788	NaN	26.4691	NaN				4	4	4	12	12	12	53.088	0	21.469	328500000	15	Q9QUR2	Q9QUR2	Dynactin subunit 4	Dctn4
28.4483	27.135	27.6447	28.5586	28.435	NaN	27.9404	28.7006				8	8	8	21.4	21.4	21.4	51.45	0	6.6037	1065100000	20	Q9QVC8	Q9QVC8	Peptidyl-prolyl cis-trans isomerase FKBP4;Peptidyl-prolyl cis-trans isomerase FKBP4, N-terminally processed	Fkbp4
29.2899	NaN	28.9857	NaN	28.6997	NaN	28.0821	NaN				9	9	9	4.4	4.4	4.4	271.06	0	19.944	1851300000	19	Q9QWN8	Q9QWN8	Spectrin beta chain, non-erythrocytic 2	Sptbn2
27.0435	26.7598	26.8806	26.253	26.1635	NaN	26.6392	NaN				6	6	6	19.3	19.3	19.3	45.239	0	21.975	547150000	14	Q9QX69	Q9QX69	LanC-like protein 1	Lancl1
34.6901	32.349	34.367	32.6019	33.8393	32.3118	33.1536	31.8705				52	34	34	65.5	48.3	48.3	104.91	0	323.31	75999000000	378	Q9QXQ0	Q9QXQ0	Alpha-actinin-4	Actn4
28.8913	29.3684	29.5031	30.5764	28.3823	27.721	29.4905	27.6814				12	12	11	30.6	30.6	28.1	56.792	0	18.894	1887000000	47	Q9QXU8	Q9QXU8	Cytoplasmic dynein 1 light intermediate chain 1	Dync1li1
25.3481	25.2432	26.6847	25.4743	NaN	NaN	26.146	NaN				3	3	3	6.9	6.9	6.9	64.727	0	7.4612	298760000	8	Q9QXY4	Q9QXY4	Opioid growth factor receptor	Ogfr
NaN	NaN	25.9963	29.0551	NaN	NaN	28.5521	NaN				2	2	2	20.6	20.6	20.6	10.906	0	3.4999	500870000	6	Q9QXY8	Q9QXY8	C-C motif chemokine 7	Ccl7
27.2637	28.3393	26.7552	27.8805	27.7779	27.5222	27.5953	27.1614				5	5	5	10	10	10	55.977	0.00053706	1.4718	512670000	11	Q9QY17	Q9QY17	Protein kinase C and casein kinase substrate in neurons 2 protein	Pacsin2
26.6483	27.3198	26.177	27.0817	26.7161	NaN	26.6828	NaN				9	9	9	5.7	5.7	5.7	211.76	0	11.907	246900000	14	Q9QYF3;P70569	Q9QYF3	Unconventional myosin-Va	Myo5a
23.438	NaN	NaN	NaN	NaN	NaN	NaN	NaN				2	2	2	6.9	6.9	6.9	29.404	0	4.0836	11364000	2	Q9QYG8	Q9QYG8	Uridine-cytidine kinase 2	Uck2
27.8394	28.2795	27.5122	28.5051	28.8847	NaN	28.1925	28.9753				5	5	5	26	26	26	24.807	0.0015	0.33691	1065500000	19	Q9QYL8	Q9QYL8	Acyl-protein thioesterase 2	Lypla2
26.1608	25.9747	26.3888	25.8189	26.3381	NaN	25.5457	NaN				5	5	5	22.1	22.1	22.1	32.497	0	2.0132	326160000	9	Q9QYU1	Q9QYU1	Peroxisomal biogenesis factor 19	Pex19
NaN	NaN	22.1377	NaN	NaN	NaN	NaN	NaN				2	2	2	7.7	7.7	7.7	33.554	0.0010438	1.0258	12020000	3	Q9QYU4	Q9QYU4	Ketimine reductase mu-crystallin	Crym
26.7441	26.8022	27.4144	27.3359	26.9532	NaN	26.9522	NaN				5	5	5	28.4	28.4	28.4	26.032	0	4.7899	590220000	18	Q9QYW3	Q9QYW3	MOB-like protein phocein	Mob4
23.8338	NaN	24.4306	26.4354	NaN	NaN	24.558	NaN				2	2	2	13.5	13.5	13.5	18.198	0.0038573	-0.18075	106730000	5	Q9QYW5	Q9QYW5	Epithelial membrane protein 3	Emp3
27.1065	26.6002	27.7954	26.8535	26.3851	NaN	27.1089	NaN				14	14	14	22.2	22.2	22.2	97.317	0	26.883	743990000	22	Q9QZ81	Q9QZ81	Protein argonaute-2	Ago2
28.4818	28.2305	28.4279	27.9321	28.3306	NaN	28.471	27.7495				11	11	11	26.8	26.8	26.8	60.07	0	48.949	1654800000	28	Q9QZ86	Q9QZ86	Nucleolar protein 58	Nop58
30.8969	31.3685	30.5485	31.5654	31.1889	30.4898	30.6603	30.5308				27	27	27	35.1	35.1	35.1	96.63	0	154.3	7033200000	117	Q9QZA2	Q9QZA2	Programmed cell death 6-interacting protein	Pdcd6ip
27.452	25.6444	26.7889	26.2575	27.9409	NaN	27.2443	NaN				3	3	3	10.3	10.3	10.3	28.355	0	7.0201	499260000	11	Q9QZA6	Q9QZA6	CD151 antigen	Cd151
NaN	NaN	NaN	NaN	NaN	NaN	26.3303	NaN				2	2	2	5.8	5.8	5.8	30.46	0.0024679	0.13866	224760000	5	Q9QZH7	Q9QZH7	F-box/LRR-repeat protein 20	Fbxl20
24.9278	NaN	23.9402	NaN	NaN	NaN	NaN	NaN				2	2	2	7.4	7.4	7.4	38.175	0.0010225	0.66169	69466000	3	Q9QZK8	Q9QZK8	Deoxyribonuclease-2-alpha	Dnase2
27.2421	28.4479	27.396	28.4974	27.7225	27.7842	27.5513	27.6902				6	6	6	14.5	14.5	14.5	51.704	0	6.124	821840000	16	Q9QZM5	Q9QZM5	Abl interactor 1	Abi1
30.9271	30.2352	30.6978	29.9356	31.2747	29.4292	30.4791	30.5611				13	13	13	28.5	28.5	28.5	63.791	0	12.243	7214000000	55	Q9QZR6	Q9QZR6	Septin-9	2018-09-09
32.0993	32.9906	32.8787	33.3517	32.0576	30.8569	32.7961	29.1418				14	14	14	59.6	59.6	59.6	22.178	0	140.56	27505000000	157	Q9R063	Q9R063	Peroxiredoxin-5, mitochondrial	Prdx5
27.743	26.5412	27.8777	26.4284	27.4573	NaN	26.9106	NaN				5	5	5	18.9	18.9	18.9	47.22	0	65.816	837220000	18	Q9R064	Q9R064	Golgi reassembly-stacking protein 2	Gorasp2
25.981	NaN	24.8718	NaN	NaN	NaN	NaN	NaN				2	2	2	4.3	4.3	4.3	74.439	0	1.792	146200000	4	Q9R080	Q9R080	G-protein-signaling modulator 1	Gpsm1
26.9936	27.9634	26.8528	27.991	27.2475	NaN	27.0402	27.1018				10	10	10	11.9	11.9	11.9	109.25	0	14.175	538120000	20	Q9R085	Q9R085	Ubiquitin carboxyl-terminal hydrolase 15	Usp15
NaN	NaN	NaN	NaN	NaN	NaN	25.7613	NaN				2	2	2	3.2	3.2	3.2	75.334	0.0010101	0.52162	622370000	4	Q9R0C5	Q9R0C5	N-acetylgalactosaminyltransferase 7	Galnt7
26.423	NaN	26.548	NaN	NaN	NaN	NaN	NaN				2	2	2	9.4	9.4	9.4	25.27	0	5.1902	306860000	4	Q9R0C9	Q9R0C9	Sigma non-opioid intracellular receptor 1	Sigmar1
29.4066	30.2199	28.4548	29.5359	29.6721	NaN	29.5922	NaN				4	4	3	12.1	12.1	9.9	46.209	0	4.351	1572300000	9	Q9R0I8	Q9R0I8	Phosphatidylinositol 5-phosphate 4-kinase type-2 alpha	Pip4k2a
30.5394	30.8075	30.3552	30.4488	30.2621	NaN	30.9345	NaN				7	7	7	23.7	23.7	23.7	49.466	0	155.64	5867300000	41	Q9R0J8	Q9R0J8	Legumain	Lgmn
NaN	NaN	24.4616	NaN	NaN	NaN	NaN	NaN				3	2	2	2.4	1.8	1.8	139.67	0.0010428	1.0192	47807000	2	Q9R0L4	Q9R0L4	Cullin-associated NEDD8-dissociated protein 2	Cand2
28.9787	29.1511	28.9757	29.3494	29.5815	NaN	29.0005	29.0251				9	9	9	21.2	21.2	21.2	57.56	0	28.564	2264000000	42	Q9R0T3	Q9R0T3	DnaJ homolog subfamily C member 3	Dnajc3
NaN	26.1722	NaN	26.2506	NaN	NaN	NaN	NaN				2	2	2	2.8	2.8	2.8	123.45	0.0043124	-0.27523	100840000	2	Q9R189	Q9R189	Protein unc-13 homolog D	Unc13d
NaN	NaN	24.2196	NaN	NaN	NaN	NaN	NaN				2	2	2	3.4	3.4	3.4	83.879	0.0038462	-0.22271	80770000	2	Q9R1D1	Q9R1D1	Transcriptional repressor CTCF	Ctcf
29.8081	NaN	29.9787	28.242	NaN	NaN	28.5057	NaN				15	15	14	30.5	30.5	29.4	82.389	0	53.587	2891500000	34	Q9R1J8	Q9R1J8	Prolyl 3-hydroxylase 1	Lepre1
32.3979	33.5831	31.8835	32.8854	34.1635	33.5212	33.5076	32.9971				11	11	11	53.9	53.9	53.9	34.194	0	184.68	24579000000	113	Q9R1T3	Q9R1T3	Cathepsin Z	Ctsz
30.3361	29.6327	30.537	29.3898	29.421	27.7972	30.5726	26.64				11	10	10	50.2	46.6	46.6	30.797	0	52.721	4945000000	52	Q9R1Z0	Q9R1Z0	Voltage-dependent anion-selective channel protein 3	Vdac3
30.2446	29.7624	30.8185	31.2621	30.9584	27.3284	31.3309	30.3812				19	19	19	55.5	55.5	55.5	51.016	0	224.28	7341400000	97	Q9WTT6	Q9WTT6	Guanine deaminase	Gda
28.5565	28.218	28.7012	28.4178	27.9215	NaN	28.1728	28.4362				5	5	5	11.2	11.2	11.2	48.049	0	32.617	1135800000	14	Q9WTT7	Q9WTT7	Basic leucine zipper and W2 domain-containing protein 2	Bzw2
26.1353	27.1961	26.176	26.9871	26.2135	NaN	26.7116	NaN				5	5	5	17.5	17.5	17.5	45.357	0	13.071	378650000	13	Q9WTV0	Q9WTV0	Prolactin regulatory element-binding protein	Preb
NaN	27.5749	26.9059	26.6818	NaN	NaN	NaN	NaN				4	4	4	19.4	19.4	19.4	24.829	0	2.915	501350000	3	Q9WTV5	Q9WTV5	26S proteasome non-ATPase regulatory subunit 9	Psmd9
NaN	NaN	26.4671	27.7067	28.2783	NaN	NaN	NaN				3	2	2	7.7	5.5	5.5	42.05	0.0093502	-0.68213	594590000	4	Q9WTY9	Q9WTY9	Mitogen-activated protein kinase 13	Mapk13
24.9873	26.26	24.7983	25.8565	25.7169	NaN	25.6697	NaN				4	4	4	6.1	6.1	6.1	127.66	0	3.9408	164820000	6	Q9WU70	Q9WU70	Syntaxin-binding protein 5	Stxbp5
30.2625	26.3937	30.2284	26.2246	28.6251	NaN	28.2049	NaN				22	22	18	38.3	38.3	32.1	85.454	0	143.13	3187700000	52	Q9WU82	Q9WU82	Catenin beta-1	Ctnnb1
25.7617	NaN	26.1331	NaN	NaN	NaN	25.9061	NaN				5	5	5	15.8	15.8	15.8	57.188	0	27.579	246410000	8	Q9WUC8	Q9WUC8	Pleiotropic regulator 1	Plrg1
27.3077	29.7998	25.9144	30.0581	28.7613	26.5291	27.4762	26.6321				9	9	9	15.8	15.8	15.8	86.705	0	25.919	1060600000	22	Q9WUD2	Q9WUD2	Transient receptor potential cation channel subfamily V member 2	Trpv2
27.458	28.4682	27.3643	28.3715	28.1898	NaN	27.6519	28.7907				7	6	3	13.2	11.8	6.2	59.972	0	2.9822	892410000	22	Q9WUD9;Q62844;Q62662;P97523	Q9WUD9	Proto-oncogene tyrosine-protein kinase Src	Src
28.5232	30.331	28.8628	30.6254	30.8865	30.4577	29.7877	31.5686				4	4	4	39	39	39	11.32	0	5.9164	2888600000	26	Q9WUF4	Q9WUF4	Vesicle-associated membrane protein 8	Vamp8
29.2413	NaN	29.2919	NaN	30.7062	NaN	28.8105	NaN				12	12	12	57.1	57.1	57.1	31.904	0	21.696	2063800000	43	Q9WUH4	Q9WUH4	Four and a half LIM domains protein 1	Fhl1
29.1789	28.774	29.1406	29.2057	28.9969	27.9419	29.1461	29.2705				15	15	15	20.7	20.7	20.7	90.759	0	33.95	2517100000	47	Q9WUL0;Q6IM78	Q9WUL0	DNA topoisomerase 1	Top1
26.4829	27.8386	26.8347	28.2083	27.5486	27.3063	27.3355	27.5135				7	7	7	32.3	32.3	32.3	25.203	0	7.5363	641940000	25	Q9WUS0	Q9WUS0	Adenylate kinase 4, mitochondrial	Ak4
28.1099	27.622	27.9977	26.9225	27.5721	26.7823	27.5295	27.2836				10	10	10	26.1	26.1	26.1	60.248	0	49.684	1035600000	28	Q9WV25	Q9WV25	Poly(U)-binding-splicing factor PUF60	Puf60
23.6909	NaN	23.9479	NaN	NaN	NaN	NaN	NaN				2	2	2	11.1	11.1	11.1	20.431	0.003403	-0.060684	41317000	2	Q9WV50	Q9WV50	60S ribosome subunit biogenesis protein NIP7 homolog	Nip7
25.3955	26.2336	25.4924	28.309	24.9745	NaN	27.5319	NaN				7	7	7	12	12	12	78.527	0	5.6354	357570000	14	Q9WV57	Q9WV57	Macrophage-expressed gene 1 protein	Mpeg1
27.1019	27.4049	27.3055	27.4849	27.3853	NaN	27.1329	NaN				7	7	7	12.9	12.9	12.9	79.792	0	6.7941	539930000	15	Q9WV63	Q9WV63	Kinesin-like protein KIF2A	Kif2a
31.1744	31.5261	31.1768	31.7513	31.6754	31.0465	31.3067	31.3269				12	12	12	54.8	54.8	54.8	23.59	0	28.021	11027000000	69	Q9WVB1	Q9WVB1	Ras-related protein Rab-6A	Rab6a
31.0661	30.2848	31.1289	30.2972	30.9413	29.5082	30.4999	29.9263				16	16	16	41.7	41.7	41.7	50.507	0	160.02	9325500000	101	Q9WVC0;Q5PQK1	Q9WVC0	Septin-7	2018-09-07
NaN	NaN	NaN	25.3127	NaN	NaN	25.4272	NaN				3	3	3	2.7	2.7	2.7	137.15	0	7.3443	103680000	5	Q9WVE9;CON__ENSEMBL:ENSBTAP00000001528	Q9WVE9	Intersectin-1	Itsn1
25.6337	NaN	25.6649	NaN	NaN	NaN	NaN	NaN				2	2	2	15.9	15.9	15.9	15.825	0	3.1148	165010000	3	Q9WVJ4	Q9WVJ4	Synaptojanin-2-binding protein	Synj2bp
NaN	NaN	NaN	NaN	NaN	NaN	25.0924	NaN				2	2	2	9.9	9.9	9.9	32.433	0.00054318	1.6509	136110000	1	Q9WVK3	Q9WVK3	Peroxisomal trans-2-enoyl-CoA reductase	Pecr
26.4713	26.6498	26.3594	26.1632	26.5225	NaN	25.3014	NaN				4	4	4	18.8	18.8	18.8	34.447	0	2.6825	291480000	8	Q9WVK7	Q9WVK7	Hydroxyacyl-coenzyme A dehydrogenase, mitochondrial	Hadh
24.0537	27.0043	24.2123	27.548	25.1029	NaN	26.3496	NaN				2	2	2	5.4	5.4	5.4	58.19	0	3.1474	198940000	9	Q9WVR6	Q9WVR6	Large neutral amino acids transporter small subunit 2	Slc7a8
NaN	NaN	25.8538	NaN	NaN	NaN	NaN	NaN				4	4	4	12.9	12.9	12.9	49.165	0	3.7755	119480000	5	Q9WVR7	Q9WVR7	Protein phosphatase 1F	Ppm1f
26.3564	26.9777	26.1084	26.7384	26.8734	NaN	26.4293	NaN				5	5	5	19.7	19.7	19.7	36.356	0	15.137	318940000	9	Q9WVS2	Q9WVS2	Probable tRNA N6-adenosine threonylcarbamoyltransferase	Osgep
31.4761	31.6239	31.7184	31.2318	31.4468	30.7781	31.0448	29.3848				11	9	9	50.2	47.3	47.3	31.007	0	56.325	11307000000	76	Q9Z0V5	Q9Z0V5	Peroxiredoxin-4	Prdx4
29.122	29.9496	29.523	29.0271	29.4533	NaN	29.2615	29.5939				6	6	6	33.5	33.5	33.5	28.295	0	32.003	2937900000	27	Q9Z0V6	Q9Z0V6	Thioredoxin-dependent peroxide reductase, mitochondrial	Prdx3
[truncated: 35 more rows]
