# Supplementary material for: The Brain Origin of Neonatal Microglia Determines the Content of Exosomes and Biological Function
Source: Preprints.org preprint supplement (doi:10.20944/preprints201907.0102.v1), 2019-07-08
Supplement: Supplementary file 11 [file Supplementary data 3.xlsx]

## Sheet: unique Spinal Cord Control
Name	Type	Total # of Neighbors	Overlap	Percent Overlap	Gene Set Seed	Overlapping Entities	p-value	#
Neighbors of Na+/H+ antiporter	Pathway	302	4	1	Na+/H+ antiporter	NR3C1,F2,GNB3,PPP2CB	7.42317e-06	1
Neighbors of PLC	Pathway	893	5	0	PLC	NR3C1,F2,GNAT3,GNB3,GAP43	2.77823e-05	2
Neighbors of Diabetes Mellitus	Pathway	1825	6	0	Diabetes Mellitus	NR3C1,F2,GNAT3,GNB3,PPP2CB,GAP43	7.04606e-05	3
Neighbors of Foreign-Body Reaction	Pathway	30	2	6	Foreign-Body Reaction	NR3C1,F2	8.26376e-05	4
Neighbors of Alzheimer Disease	Pathway	1143	5	0	Alzheimer Disease	NR3C1,F2,GNB3,PPP2CB,GAP43	8.99925e-05	5
Neighbors of Epilepsy	Pathway	604	4	0	Epilepsy	NR3C1,F2,GAP43,BSN	0.000110411	6
Neighbors of Mastocytoma	Pathway	36	2	5	Mastocytoma	NR3C1,F2	0.00011818	7
Neighbors of cortical lesions	Pathway	38	2	5	cortical lesions	F2,GAP43	0.000131423	8
Neighbors of Memory Disorders	Pathway	250	3	1	Memory Disorders	NR3C1,F2,GAP43	0.000164534	9
Neighbors of Lipid degradation	Pathway	672	4	0	Lipid degradation	LIPA,NR3C1,F2,GNB3	0.000166343	10
Neighbors of brain function	Pathway	673	4	0	brain function	PTDSS1,NR3C1,F2,GAP43	0.000167294	11
Neighbors of Nerve Degeneration	Pathway	1309	5	0	Nerve Degeneration	NR3C1,F2,PPP2CB,GAP43,BSN	0.000170425	12
Neighbors of GATA	Pathway	46	2	4	GATA	NR3C1,F2	0.000191341	13
Neighbors of DUSP	Pathway	46	2	4	DUSP	NR3C1,F2	0.000191341	14
Neighbors of learning and/or memory	Pathway	753	4	0	learning and/or memory	NR3C1,F2,PPP2CB,GAP43	0.000256994	15
Neighbors of tissue regeneration	Pathway	295	3	1	tissue regeneration	NR3C1,F2,GAP43	0.000267199	16
Neighbors of blast transformation	Pathway	59	2	3	blast transformation	NR3C1,F2	0.000312276	17
Neighbors of learning	Pathway	798	4	0	learning	NR3C1,F2,SHC2,GAP43	0.000320521	18
Neighbors of Abnormalities	Pathway	2458	6	0	Abnormalities	NDUFS4,NR3C1,F2,GNB3,PPP2CB,GAP43	0.000364992	19
Neighbors of Respiratory Insufficiency	Pathway	64	2	3	Respiratory Insufficiency	NR3C1,F2	0.000366509	20
Neighbors of L-type calcium channels	Pathway	359	3	0	L-type calcium channels	F2,GNB3,GAP43	0.000473635	21
Neighbors of Irritable Bowel Syndrome	Pathway	84	2	2	Irritable Bowel Syndrome	NR3C1,GNB3	0.000625908	22
Neighbors of Hyperhomocysteinemia	Pathway	85	2	2	Hyperhomocysteinemia	NR3C1,F2	0.00064065	23
Neighbors of Leukopenia	Pathway	90	2	2	Leukopenia	NR3C1,F2	0.000716874	24
Neighbors of voltage-gated Ca2+ channel	Pathway	429	3	0	voltage-gated Ca2+ channel	F2,GNAT3,GNB3	0.000793675	25
Neighbors of nerve sprouting	Pathway	96	2	2	nerve sprouting	F2,GAP43	0.000813858	26
Neighbors of Hypertension	Pathway	1029	4	0	Hypertension	NDUFS4,NR3C1,F2,GNB3	0.000836031	27
Neighbors of Adenoviridae Infections	Pathway	98	2	2	Adenoviridae Infections	SNF8,F2	0.000847518	28
Neighbors of astrocyte function	Pathway	99	2	2	astrocyte function	NR3C1,F2	0.000864598	29
Neighbors of Cystitis	Pathway	104	2	1	Cystitis	F2,GAP43	0.000952482	30
Neighbors of nerve potential	Pathway	106	2	1	nerve potential	NR3C1,GNAT3	0.000988795	31
Neighbors of Behcet Syndrome	Pathway	110	2	1	Behcet Syndrome	NR3C1,F2	0.0010634	32
Neighbors of protein ubiquitination	Pathway	1960	5	0	protein ubiquitination	NR3C1,F2,PPP2CB,GAP43,BSN	0.00109635	33
Neighbors of Depressive Symptoms	Pathway	114	2	1	Depressive Symptoms	NR3C1,GNB3	0.00114064	34
Neighbors of mesenchymal cell proliferation	Pathway	115	2	1	mesenchymal cell proliferation	NR3C1,F2	0.00116036	35
Neighbors of paw edema	Pathway	118	2	1	paw edema	NR3C1,F2	0.0012205	36
Neighbors of ERMs	Pathway	122	2	1	ERMs	F2,PPP2CB	0.00130298	37
Neighbors of cognitive impairment	Pathway	510	3	0	cognitive impairment	NR3C1,F2,GAP43	0.00130571	38
Neighbors of hippocampus plasticity	Pathway	125	2	1	hippocampus plasticity	NR3C1,F2	0.00136656	39
Neighbors of amino acid transport	Pathway	126	2	1	amino acid transport	NR3C1,F2	0.00138808	40
Neighbors of Systemic Inflammatory Response Syndrome	Pathway	127	2	1	Systemic Inflammatory Response Syndrome	NR3C1,F2	0.00140976	41
Neighbors of vesicle docking	Pathway	130	2	1	vesicle docking	GAP43,BSN	0.00147577	42
Neighbors of synaptic vesicle transport	Pathway	132	2	1	synaptic vesicle transport	GAP43,BSN	0.00152059	43
Neighbors of Nasal Polyps	Pathway	132	2	1	Nasal Polyps	NR3C1,F2	0.00152059	44
Neighbors of Lupus Erythematosus, Systemic	Pathway	538	3	0	Lupus Erythematosus, Systemic	NR3C1,F2,PPP2CB	0.00152168	45
Neighbors of axonogenesis	Pathway	548	3	0	axonogenesis	PTDSS1,PPP2CB,GAP43	0.00160395	46
Neighbors of histogenesis	Pathway	550	3	0	histogenesis	NR3C1,F2,GAP43	0.00162073	47
Neighbors of Periodontitis	Pathway	139	2	1	Periodontitis	NR3C1,F2	0.00168254	48
Neighbors of tissue remodeling	Pathway	558	3	0	tissue remodeling	LIPA,NR3C1,F2	0.00168898	49
Neighbors of essential hypertension	Pathway	144	2	1	essential hypertension	NR3C1,F2	0.00180306	50
Neighbors of chronic inflammation	Pathway	573	3	0	chronic inflammation	LIPA,NR3C1,F2	0.00182176	51
Neighbors of membrane hyperpolarization	Pathway	576	3	0	membrane hyperpolarization	NDUFS4,NR3C1,F2	0.00184909	52
Neighbors of Schwann cell proliferation	Pathway	148	2	1	Schwann cell proliferation	NR3C1,GAP43	0.00190236	53
Neighbors of mdx dystrophy	Pathway	149	2	1	mdx dystrophy	NR3C1,GAP43	0.00192758	54
Neighbors of Schizophrenia	Pathway	586	3	0	Schizophrenia	NR3C1,F2,GAP43	0.00194202	55
Neighbors of Nephrotic Syndrome	Pathway	150	2	1	Nephrotic Syndrome	NR3C1,F2	0.00195296	56
Neighbors of Hyperalgesia	Pathway	594	3	0	Hyperalgesia	NR3C1,F2,GAP43	0.00201845	57
Neighbors of bacterium adherence	Pathway	153	2	1	bacterium adherence	F2,GAP43	0.00203007	58
Neighbors of Steatohepatitis	Pathway	604	3	0	Steatohepatitis	LIPA,NR3C1,F2	0.00211661	59
Neighbors of neuronal plasticity	Pathway	608	3	0	neuronal plasticity	NR3C1,F2,GAP43	0.00215669	60
Neighbors of hexokinase	Pathway	160	2	1	hexokinase	NR3C1,F2	0.00221556	61
Neighbors of Liver Failure	Pathway	160	2	1	Liver Failure	NR3C1,F2	0.00221556	62
Neighbors of steroidogenesis	Pathway	619	3	0	steroidogenesis	LIPA,NR3C1,F2	0.00226938	63
Neighbors of Vascular Calcification	Pathway	162	2	1	Vascular Calcification	NR3C1,F2	0.00226998	64
Neighbors of mitogen-activated protein kinase	Pathway	2316	5	0	mitogen-activated protein kinase	NDUFS4,NR3C1,F2,SHC2,PPP2CB	0.00231516	65
Neighbors of peripheral nerve injury	Pathway	164	2	1	peripheral nerve injury	NR3C1,GAP43	0.00232504	66
Neighbors of cell loss	Pathway	625	3	0	cell loss	NR3C1,F2,GAP43	0.00233238	67
Neighbors of Atrophy	Pathway	634	3	0	Atrophy	NR3C1,F2,GAP43	0.0024289	68
Neighbors of nuclear import	Pathway	640	3	0	nuclear import	NR3C1,F2,PPP2CB	0.00249462	69
Neighbors of exocytosis	Pathway	1385	4	0	exocytosis	PTDSS1,F2,GAP43,BSN	0.00250648	70
Neighbors of lipid hydrolysis	Pathway	171	2	1	lipid hydrolysis	LIPA,F2	0.0025227	71
Neighbors of microtubule cytoskeleton assembly	Pathway	644	3	0	microtubule cytoskeleton assembly	NR3C1,F2,GAP43	0.00253905	72
Neighbors of breathing	Pathway	647	3	0	breathing	NDUFS4,NR3C1,F2	0.00257269	73
Neighbors of SNAP receptor	Pathway	175	2	1	SNAP receptor	NR3C1,F2	0.0026391	74
Neighbors of Depressive Disorder, Major	Pathway	175	2	1	Depressive Disorder, Major	NR3C1,GNB3	0.0026391	75
Neighbors of excitotoxicity	Pathway	654	3	0	excitotoxicity	NR3C1,F2,GAP43	0.00265227	76
Neighbors of Fetal Growth Retardation	Pathway	177	2	1	Fetal Growth Retardation	NR3C1,F2	0.00269824	77
Neighbors of cognition	Pathway	665	3	0	cognition	NR3C1,F2,GAP43	0.0027804	78
Neighbors of calcium channel	Pathway	666	3	0	calcium channel	F2,GNB3,BSN	0.00279224	79
Neighbors of Obesity	Pathway	1432	4	0	Obesity	NR3C1,F2,GNAT3,GNB3	0.00283025	80
Neighbors of Wounds	Pathway	674	3	0	Wounds	NR3C1,F2,GAP43	0.00288806	81
Neighbors of neuronal death	Pathway	1447	4	0	neuronal death	NDUFS4,NR3C1,F2,GAP43	0.00293943	82
Neighbors of proton sodium exchange	Pathway	187	2	1	proton sodium exchange	F2,GNB3	0.0030033	83
Neighbors of nerve cell differentiation	Pathway	1457	4	0	nerve cell differentiation	NR3C1,F2,PPP2CB,GAP43	0.00301382	84
Neighbors of Respiratory Distress Syndrome, Adult	Pathway	188	2	1	Respiratory Distress Syndrome, Adult	NR3C1,F2	0.00303466	85
Neighbors of Polymerase II transcription	Pathway	190	2	1	Polymerase II transcription	SNF8,F2	0.00309785	86
Neighbors of synapse maturation	Pathway	190	2	1	synapse maturation	F2,GAP43	0.00309785	87
Neighbors of Hyperglycemia	Pathway	693	3	0	Hyperglycemia	NR3C1,F2,PPP2CB	0.00312378	88
Neighbors of Mood Disorders	Pathway	191	2	1	Mood Disorders	NR3C1,GNB3	0.00312967	89
Neighbors of GTP binding protein	Pathway	193	2	1	GTP binding protein	F2,GAP43	0.00319378	90
Neighbors of thrombocyte aggregation	Pathway	709	3	0	thrombocyte aggregation	NR3C1,F2,GNB3	0.00333128	91
Neighbors of CAMK	Pathway	198	2	1	CAMK	F2,GAP43	0.00335676	92
Neighbors of Small Cell Lung Carcinoma	Pathway	198	2	1	Small Cell Lung Carcinoma	NR3C1,F2	0.00335676	93
Neighbors of Parkinsonian Disorders	Pathway	199	2	1	Parkinsonian Disorders	NDUFS4,F2	0.00338982	94
Neighbors of actin filament depolymerization	Pathway	203	2	0	actin filament depolymerization	F2,GAP43	0.00352358	95
Neighbors of neuronal activity	Pathway	727	3	0	neuronal activity	NR3C1,F2,GAP43	0.00357473	96
Neighbors of myocyte hypertrophy	Pathway	205	2	0	myocyte hypertrophy	NR3C1,F2	0.00359138	97
Neighbors of epithelial cell permeability	Pathway	208	2	0	epithelial cell permeability	NR3C1,F2	0.00369423	98
Neighbors of kidney blood flow	Pathway	208	2	0	kidney blood flow	NR3C1,F2	0.00369423	99
Neighbors of RNA splicing	Pathway	1543	4	0	RNA splicing	NDUFS4,LIPA,NR3C1,F2	0.00370843	100

## Sheet: Unique Cortex-LPS
Name	Type	Total # of Neighbors	Overlap	Percent Overlap	Gene Set Seed	Overlapping Entities	p-value	#
Neighbors of apoptosis	Pathway	7607	61	0	apoptosis	ITPR2,ATP6AP2,ATP7A,ACACA,GCH1,GK,PDK1,CEBPB,YBX3,PTPRE,CTCF,CC2D1A,TSC22D1,NF2,MAPRE2,TUBG1,RAD50,UBE4A,CUL7,STX18,KDELR1,VAMP2,DMD,SH2B2,STK17B,PRPF4B,RPS27,ANGPTL4,SPP1,JAK2,PAK1,TAOK1,LYN,DAXX,NCS1,IL18,NEK6,PPM1F,PTPRA,PTPN2,RAB27B,CTSH,VMP1,NLRC4,ADAR,PROS1,BRCC3,ALDH1A2,PIP5K1A,ELAC2,DCXR,NUBP1,DLG3,RBM3,UNC119,CRABP1,HPCA,SIGMAR1,SEPT8,PGGT1B,DCUN1D5	6.20422e-14	1
Neighbors of cell proliferation	Pathway	8093	59	0	cell proliferation	ITPR2,ATP6AP2,ACACA,AMACR,GCH1,PDK1,CEBPB,YBX3,PTPRE,CLEC2D,CTCF,CC2D1A,TSC22D1,NF2,MAPRE2,TUBG1,RAD50,CUL7,STX18,KDELR1,VAMP2,EXOSC9,DMD,SH2B2,STK17B,PRPF4B,RPS27,ANGPTL4,SPP1,JAK2,PAK1,TAOK1,LYN,DAXX,IL18,NEK6,AAK1,PTPRA,PPP1R14B,PTPN2,RAB27B,CTSH,VMP1,NLRC4,ADAR,PROS1,UNC13D,BRCC3,ALDH1A2,ARFGAP3,ELAC2,RBM3,UNC119,CRABP1,SIGMAR1,YIPF3,PGGT1B,FIP1L1,SH3GLB2	1.83167e-11	2
Neighbors of Death	Pathway	3018	31	1	Death	ITPR2,ATP6AP2,ATP7A,FAH,ACACA,GK,PDK1,CEBPB,CTCF,TSC22D1,SNAPIN,DMD,SH2B2,ANGPTL4,SPP1,JAK2,PAK1,LYN,DAXX,IL18,PPM1F,PTPRA,PTPN2,CTSH,NLRC4,ADAR,PROS1,ALDH1A2,UNC119,HPCA,SIGMAR1	5.63533e-09	3
Neighbors of cell survival	Pathway	3701	33	0	cell survival	ATP6AP2,ACACA,GCH1,CEBPB,YBX3,CLEC2D,CTCF,CC2D1A,TSC22D1,MAPRE2,RAD50,DMD,STK17B,ANGPTL4,SPP1,JAK2,PAK1,LYN,DAXX,NCS1,IL18,NEK6,PTPRA,ADAR,PROS1,PIP5K1C,BRCC3,ARFGAP1,DCXR,NUBP1,RBM3,HPCA,SIGMAR1	5.0091e-08	4
Neighbors of cell death	Pathway	4895	38	0	cell death	FAH,ACACA,GK,PDK1,CEBPB,CTCF,TSC22D1,NF2,RAD50,GTF2F1,UBE4A,CUL7,KDELR1,DMD,STK17B,SPP1,JAK2,PAK1,TAOK1,LYN,DAXX,NCS1,IL18,NEK6,PPM1F,PTPN2,CTSH,VMP1,NLRC4,ADAR,PROS1,BRCC3,MRI1,DCXR,RBM3,HPCA,SIGMAR1,PGGT1B	1.30103e-07	5
Neighbors of nerve cell differentiation	Pathway	1457	19	1	nerve cell differentiation	ATP7A,CEBPB,CTCF,CC2D1A,NF2,DMD,SPP1,PAK1,TAOK1,LYN,IL18,PTPRA,PTPN2,PIP5K1C,CRABP1,HPCA,SIGMAR1,TMEM30A,PGGT1B	2.67928e-07	6
Neighbors of cell growth	Pathway	5082	36	0	cell growth	ITPR2,ATP6AP2,ACACA,PYCRL,CEBPB,YBX3,PTPRE,CTCF,TSC22D1,NF2,TUBG1,RAD50,CUL7,STX18,DMD,SH2B2,PRPF4B,ANGPTL4,SPP1,JAK2,PAK1,LYN,DAXX,NCS1,IL18,PTPRA,PTPN2,ADAR,PROS1,ALDH1A2,ARFGAP1,NUBP1,RBM3,CRABP1,SIGMAR1,PGGT1B	3.04271e-06	7
Neighbors of cell cycle regulation	Pathway	1333	16	1	cell cycle regulation	ITPR2,GCH1,CEBPB,CTCF,TSC22D1,TUBG1,RAD50,UBE4A,SPP1,JAK2,PAK1,TAOK1,LYN,NEK6,RBM3,CRABP1	7.54097e-06	8
Neighbors of microtubule cytoskeleton assembly	Pathway	644	11	1	microtubule cytoskeleton assembly	NF2,TUBG1,SNAPIN,PAK1,TAOK1,LYN,NCS1,IL18,NEK6,UNC119,TMEM30A	9.51205e-06	9
Neighbors of actin organization	Pathway	1720	18	1	actin organization	NF2,TUBG1,VAMP2,DMD,SH2B2,ANGPTL4,SPP1,JAK2,PAK1,LYN,NCS1,IL18,AAK1,PPM1F,PIP5K1C,PIP5K1A,ARFGAP1,UNC119	1.24675e-05	10
Neighbors of neuroprotection	Pathway	944	13	1	neuroprotection	ITPR2,ACACA,PDK1,ANGPTL4,SPP1,JAK2,NCS1,PROS1,DCXR,RBM3,HPCA,SIGMAR1,PGGT1B	1.41423e-05	11
Neighbors of neurite outgrowth	Pathway	1752	18	1	neurite outgrowth	CEBPB,CC2D1A,NF2,SNAPIN,VAMP2,DMD,SPP1,JAK2,PAK1,TAOK1,LYN,NCS1,IL18,PTPRA,HPCA,SIGMAR1,TMEM30A,PGGT1B	1.59669e-05	12
Neighbors of Cancer	Pathway	4357	31	0	Cancer	ATP6AP1,ACACA,AMACR,CEBPB,YBX3,CTCF,CC2D1A,TSC22D1,NF2,TUBG1,RAD50,PRPF4B,RPS27,ANGPTL4,SPP1,JAK2,PAK1,LYN,DAXX,IL18,NEK6,PTPRA,PTPN2,RAB27B,CTSH,ADAR,PROS1,DCXR,RBM3,SIGMAR1,SH3GLB2	1.81644e-05	13
Neighbors of synaptic	Pathway	1128	14	1	synaptic	SNAPIN,VAMP2,AP3M2,DMD,SPP1,JAK2,PAK1,NCS1,IL18,PTPRA,ADAR,PROS1,DLG3,SIGMAR1	2.05349e-05	14
Neighbors of cell differentiation	Pathway	6987	42	0	cell differentiation	ITPR2,ATP6AP2,ATP7A,HMGCL,ACACA,GK,CEBPB,YBX3,PTPRE,CLEC2D,CTCF,TSC22D1,NF2,MAPRE2,TUBG1,UBE4A,VAMP2,RAB3D,EXOSC9,DMD,SH2B2,ANGPTL4,SPP1,JAK2,PAK1,LYN,DAXX,IL18,PTPRA,PTPN2,RAB27B,CTSH,ADAR,ALDH1A2,RBM3,UNC119,CRABP1,SIGMAR1,YIPF3,PGGT1B,CAND2,LRRC8C	2.19163e-05	15
Neighbors of endocytosis	Pathway	1976	19	0	endocytosis	ATP6AP1,ATP7A,CEBPB,CLEC2D,NF2,SNAPIN,VAMP2,RAB3D,SH2B2,JAK2,PAK1,LYN,NCS1,AAK1,PROS1,PIP5K1C,ARFGAP1,UNC119,HPCA	2.25812e-05	16
Neighbors of ROS generation	Pathway	1802	18	0	ROS generation	ACACA,AMACR,GCH1,PDK1,DMD,SH2B2,PRPF4B,ANGPTL4,SPP1,JAK2,PAK1,LYN,IL18,PROS1,UNC13D,DCXR,SIGMAR1,PGGT1B	2.32181e-05	17
Neighbors of eosinophil differentiation	Pathway	50	4	7	eosinophil differentiation	CEBPB,JAK2,LYN,FIP1L1	2.46268e-05	18
Neighbors of degranulation	Pathway	716	11	1	degranulation	GCH1,VAMP2,RAB3D,SH2B2,SPP1,JAK2,PAK1,LYN,IL18,UNC13D,ORMDL3	2.52669e-05	19
Neighbors of mitosis	Pathway	2233	20	0	mitosis	ACACA,CEBPB,CTCF,CC2D1A,HAUS1,TUBG1,RAD50,PRPF4B,SPP1,JAK2,PAK1,TAOK1,LYN,DAXX,NEK6,PTPRA,PROS1,DLG3,RBM3,SEPT8	3.66385e-05	20
Neighbors of Abnormalities	Pathway	2458	21	0	Abnormalities	ATP7A,GK,CEBPB,PTPRE,NF2,TUBG1,DMD,SH2B2,SPP1,JAK2,PAK1,LYN,IL18,PPM1F,PTPRA,PTPN2,ADAR,PROS1,ALDH1A2,UNC119,SIGMAR1	4.51496e-05	21
Neighbors of S phase	Pathway	1548	16	1	S phase	CEBPB,YBX3,CTCF,NF2,TUBG1,RAD50,PRPF4B,SPP1,JAK2,DAXX,IL18,NEK6,PTPRA,PTPN2,ADAR,PGGT1B	4.66754e-05	22
Neighbors of synaptic plasticity	Pathway	1124	13	1	synaptic plasticity	ATP7A,VAMP2,DMD,JAK2,PAK1,NCS1,IL18,PROS1,DLG3,RBM3,HPCA,SIGMAR1,GRIPAP1	8.47638e-05	23
Neighbors of secretory pathway	Pathway	564	9	1	secretory pathway	ATP6AP1,ATP7A,RAB3D,LYN,IL18,RAB27B,UNC13D,ARFGAP3,ARFGAP1	0.000107526	24
Neighbors of Neoplasms	Pathway	5248	33	0	Neoplasms	ACACA,AMACR,PDK1,CEBPB,YBX3,PTPRE,CLEC2D,CTCF,TSC22D1,NF2,RAD50,CUL7,DMD,SH2B2,STK17B,RPS27,ANGPTL4,SPP1,JAK2,PAK1,LYN,DAXX,IL18,NEK6,PTPRA,CTSH,NLRC4,ADAR,ELAC2,DCXR,RBM3,CRABP1,PGGT1B	0.000110148	25
Neighbors of cell division	Pathway	1866	17	0	cell division	ACACA,CEBPB,CTCF,TSC22D1,NF2,TUBG1,PRPF4B,SPP1,JAK2,PAK1,TAOK1,LYN,IL18,PTPN2,NUBP1,SIGMAR1,PGGT1B	0.00012468	26
Neighbors of aorta constriction	Pathway	147	5	3	aorta constriction	ITPR2,ACACA,GCH1,SPP1,SIGMAR1	0.000133855	27
Neighbors of cell motility	Pathway	2074	18	0	cell motility	ACACA,YBX3,CTCF,NF2,CUL7,DMD,ANGPTL4,SPP1,JAK2,PAK1,LYN,IL18,PPM1F,PTPRA,PROS1,ARFGAP3,C15orf48,SH3GLB2	0.0001416	28
Neighbors of Diabetic Nephropathies	Pathway	459	8	1	Diabetic Nephropathies	ATP6AP2,GCH1,TSC22D1,SH2B2,SPP1,JAK2,PAK1,IL18	0.000145129	29
Neighbors of protein processing	Pathway	591	9	1	protein processing	CEBPB,SPP1,PAK1,CTSH,VMP1,PROS1,SIGMAR1,PGGT1B,SH3GLB2	0.000152574	30
Neighbors of RNA splicing	Pathway	1543	15	0	RNA splicing	ATP7A,PCCA,PCCB,CTCF,DMD,SH2B2,PRPF4B,SPP1,JAK2,PAK1,PTPN2,ADAR,PROS1,UNC13D,RBM3	0.000162045	31
Neighbors of lipid storage	Pathway	1043	12	1	lipid storage	ACACA,AMACR,GK,CEBPB,CTCF,VAMP2,SH2B2,ANGPTL4,SPP1,JAK2,NLRC4,ALDH1A2	0.000169688	32
Neighbors of immune response	Pathway	2703	21	0	immune response	ACACA,GCH1,CEBPB,CLEC2D,DMD,SH2B2,SPP1,JAK2,PAK1,LYN,DAXX,IL18,PTPN2,NLRC4,ADAR,PROS1,UNC13D,ALDH1A2,ORMDL3,SIGMAR1,SH3GLB2	0.000173762	33
Neighbors of exocytosis	Pathway	1385	14	1	exocytosis	ITPR2,ATP6AP1,ATP7A,NF2,SNAPIN,VAMP2,RAB3D,DMD,LYN,NCS1,RAB27B,UNC13D,SIGMAR1,SEPT8	0.00018317	34
Neighbors of Insulin Resistance	Pathway	1220	13	1	Insulin Resistance	ATP6AP2,ACACA,GK,CEBPB,DMD,SH2B2,ANGPTL4,SPP1,JAK2,IL18,PTPRA,LRRC8C,C15orf48	0.000190319	35
Neighbors of endothelial cell function	Pathway	750	10	1	endothelial cell function	ITPR2,ATP7A,GCH1,ANGPTL4,SPP1,JAK2,PAK1,IL18,PROS1,SIGMAR1	0.000190932	36
Neighbors of bone resorption	Pathway	750	10	1	bone resorption	ATP6AP1,CEBPB,CLEC2D,ANGPTL4,SPP1,LYN,IL18,PTPN2,PROS1,PGGT1B	0.000190932	37
Neighbors of macrophage activation	Pathway	613	9	1	macrophage activation	CEBPB,SNAPIN,SH2B2,ANGPTL4,SPP1,JAK2,LYN,IL18,NLRC4	0.000200069	38
Neighbors of left ventricular diastolic dysfunction	Pathway	34	3	8	left ventricular diastolic dysfunction	GCH1,DMD,IL18	0.000210327	39
Neighbors of protein synthesis	Pathway	1952	17	0	protein synthesis	ATP7A,CEBPB,CTCF,DMD,SH2B2,RPS27,SPP1,JAK2,PAK1,TAOK1,LYN,DAXX,IL18,ADAR,PROS1,RBM3,SIGMAR1	0.000213125	40
Neighbors of Pseudomonas aeruginosa infection	Pathway	89	4	4	Pseudomonas aeruginosa infection	SH2B2,LYN,IL18,NLRC4	0.000228201	41
Neighbors of response to DNA damage	Pathway	1078	12	1	response to DNA damage	CEBPB,CTCF,TUBG1,RAD50,CUL7,PAK1,LYN,DAXX,NEK6,BRCC3,RBM3,DCUN1D5	0.000229627	42
Neighbors of oxidative stress	Pathway	2356	19	0	oxidative stress	ITPR2,ATP6AP2,FAH,ACACA,GCH1,CEBPB,YBX3,DMD,ANGPTL4,SPP1,JAK2,TAOK1,DAXX,IL18,PTPRA,PROS1,DCXR,CRYZ,SIGMAR1	0.0002329	43
Neighbors of Diabetes Mellitus	Pathway	1825	16	0	Diabetes Mellitus	ATP6AP2,ATP7A,GFPT2,GCH1,GK,CEBPB,SH2B2,ANGPTL4,SPP1,JAK2,PAK1,IL18,PTPN2,CTSH,PROS1,SIGMAR1	0.000310069	44
Neighbors of cell cycle progression	Pathway	2619	20	0	cell cycle progression	ACACA,CEBPB,YBX3,CTCF,NF2,TUBG1,GTF2F1,CUL7,SPP1,JAK2,PAK1,LYN,DAXX,IL18,NEK6,PPP1R14B,ELAC2,RBM3,SIGMAR1,PGGT1B	0.000319263	45
Neighbors of vascularization	Pathway	3042	22	0	vascularization	GCH1,CEBPB,YBX3,CTCF,NF2,MAPRE2,RAD50,DMD,SH2B2,RPS27,ANGPTL4,SPP1,JAK2,PAK1,LYN,IL18,CTSH,PROS1,BRCC3,ALDH1A2,CRABP1,SIGMAR1	0.00032704	46
Neighbors of neurotransmission	Pathway	960	11	1	neurotransmission	ITPR2,ATP6AP2,GCH1,SNAPIN,VAMP2,DMD,SPP1,NCS1,IL18,PROS1,SIGMAR1	0.000332711	47
Neighbors of proteolysis	Pathway	1651	15	0	proteolysis	CEBPB,NF2,UBE4A,CUL7,SNAPIN,DMD,ANGPTL4,SPP1,JAK2,PAK1,DAXX,IL18,CTSH,PROS1,FIP1L1	0.000334642	48
Neighbors of INSR	Pathway	40	3	7	INSR	PTPRE,SH2B2,PTPRA	0.000337686	49
Neighbors of Ca++ export	Pathway	1129	12	1	Ca++ export	ITPR2,ATP7A,SNAPIN,DMD,SPP1,LYN,NCS1,PTPRA,PIP5K1C,ORMDL3,HPCA,SIGMAR1	0.000348828	50
Neighbors of Fatty Liver	Pathway	284	6	2	Fatty Liver	PCCA,ACACA,CEBPB,ANGPTL4,JAK2,IL18	0.000371346	51
Neighbors of Nerve Degeneration	Pathway	1309	13	0	Nerve Degeneration	ATP7A,GCH1,SNAPIN,DMD,SPP1,JAK2,IL18,CTSH,ADAR,PROS1,DCXR,HPCA,SIGMAR1	0.000374433	52
Neighbors of Propionic Acidemia	Pathway	8	2	22	Propionic Acidemia	PCCA,PCCB	0.000380881	53
Neighbors of Splenomegaly	Pathway	186	5	2	Splenomegaly	JAK2,LYN,PTPN2,ADAR,PGGT1B	0.000395194	54
Neighbors of superoxide anion generation	Pathway	830	10	1	superoxide anion generation	ATP7A,GCH1,VAMP2,ANGPTL4,SPP1,PAK1,LYN,IL18,DCXR,PGGT1B	0.000425267	55
Neighbors of morphogenesis	Pathway	2082	17	0	morphogenesis	CEBPB,CTCF,TSC22D1,NF2,TUBG1,CUL7,VAMP2,SPP1,PAK1,PPM1F,TRIP13,CTSH,ALDH1A2,PIP5K1A,DLG3,SIGMAR1,SPECC1L	0.000450124	56
Neighbors of Leukemia, Myeloid	Pathway	192	5	2	Leukemia, Myeloid	CEBPB,JAK2,LYN,IL18,PTPN2	0.000456425	57
Neighbors of T-cell activation	Pathway	1343	13	0	T-cell activation	PDK1,CEBPB,CLEC2D,SNAPIN,SH2B2,STK17B,SPP1,PAK1,LYN,IL18,PTPRA,PTPN2,UNC119	0.000476961	58
Neighbors of Hyperglycemia	Pathway	693	9	1	Hyperglycemia	GCH1,CEBPB,SH2B2,ANGPTL4,SPP1,JAK2,PAK1,IL18,PTPN2	0.000488438	59
Neighbors of synaptogenesis	Pathway	1015	11	1	synaptogenesis	ATP7A,CTCF,CC2D1A,VAMP2,DMD,PAK1,NCS1,IL18,PTPRA,DLG3,SIGMAR1	0.000530048	60
Neighbors of Infection	Pathway	2524	19	0	Infection	ACACA,CEBPB,TUBG1,STX18,DMD,SH2B2,SPP1,JAK2,PAK1,LYN,DAXX,IL18,PTPN2,CTSH,NLRC4,ADAR,PROS1,PIP5K1A,UNC119	0.000550134	61
Neighbors of Hemoglobin F Disease	Pathway	10	2	18	Hemoglobin F Disease	YBX3,GTF2F1	0.000579402	62
Neighbors of Hypersensitivity	Pathway	1027	11	1	Hypersensitivity	ATP7A,GCH1,RAD50,UBE4A,DMD,STK17B,SPP1,LYN,IL18,ADAR,SIGMAR1	0.000584127	63
Neighbors of G2 DNA damage checkpoint	Pathway	311	6	1	G2 DNA damage checkpoint	CTCF,RAD50,JAK2,TAOK1,LYN,BRCC3	0.000597987	64
Neighbors of synaptic vesicle exocytosis	Pathway	115	4	3	synaptic vesicle exocytosis	SNAPIN,VAMP2,NCS1,RAB27B	0.00059897	65
Neighbors of macrophage differentiation	Pathway	312	6	1	macrophage differentiation	CEBPB,CTCF,SPP1,IL18,PTPN2,NLRC4	0.000608068	66
Neighbors of vesicular trafficking	Pathway	441	7	1	vesicular trafficking	NF2,RAB3D,NCS1,RAB27B,PROS1,UNC13D,UNC119	0.000664842	67
Neighbors of protein ubiquitination	Pathway	1960	16	0	protein ubiquitination	GCH1,TSC22D1,NF2,TUBG1,UBE4A,CUL7,SH2B2,SPP1,JAK2,PAK1,LYN,DAXX,PROS1,BRCC3,PGGT1B,CAND2	0.000675762	68
Neighbors of right ventricular dilatation	Pathway	11	2	16	right ventricular dilatation	DMD,IL18	0.000693789	69
Neighbors of cardiac remodeling	Pathway	583	8	1	cardiac remodeling	ATP6AP2,CEBPB,SPP1,JAK2,PAK1,NCS1,IL18,PROS1	0.000710605	70
Neighbors of mitotic entry	Pathway	1239	12	0	mitotic entry	CEBPB,NF2,TUBG1,SH2B2,ANGPTL4,SPP1,JAK2,PAK1,TAOK1,IL18,PROS1,SIGMAR1	0.000792327	71
Neighbors of Genetic Diseases, X-Linked	Pathway	54	3	5	Genetic Diseases, X-Linked	ATP7A,GK,DMD	0.000803748	72
Neighbors of Myeloproliferative Disorders	Pathway	218	5	2	Myeloproliferative Disorders	CEBPB,JAK2,LYN,PGGT1B,FIP1L1	0.000807747	73
Neighbors of osteoclast differentiation	Pathway	595	8	1	osteoclast differentiation	CEBPB,CLEC2D,ANGPTL4,SPP1,LYN,IL18,ADAR,PIP5K1C	0.0008104	74
Neighbors of GPCR	Pathway	458	7	1	GPCR	ITPR2,ANGPTL4,SPP1,PAK1,NCS1,PROS1,SIGMAR1	0.000828937	75
Neighbors of chromosome structure	Pathway	126	4	3	chromosome structure	YBX3,CTCF,DAXX,TRIP13	0.000840946	76
Neighbors of neuronal death	Pathway	1447	13	0	neuronal death	ITPR2,ATP7A,CEBPB,VAMP2,DMD,ANGPTL4,SPP1,JAK2,PAK1,IL18,HPCA,SIGMAR1,PGGT1B	0.000950729	77
Neighbors of osteoclast development	Pathway	762	9	1	osteoclast development	ITPR2,ATP6AP1,CEBPB,CLEC2D,ANGPTL4,SPP1,JAK2,LYN,IL18	0.000955637	78
Neighbors of Intellectual Disability	Pathway	345	6	1	Intellectual Disability	ATP6AP2,CTCF,CC2D1A,DMD,PAK1,DLG3	0.00102181	79
Neighbors of invasive growth	Pathway	230	5	2	invasive growth	SLC15A3,ANGPTL4,SPP1,RAB27B,CTSH	0.00102489	80
Neighbors of Mental Retardation, X-Linked	Pathway	59	3	5	Mental Retardation, X-Linked	ATP6AP2,DMD,NCS1	0.00103596	81
Neighbors of cell cycle	Pathway	3327	22	0	cell cycle	ACACA,CEBPB,YBX3,TSC22D1,NF2,TUBG1,RAD50,CUL7,DMD,ANGPTL4,SPP1,JAK2,PAK1,DAXX,PTPRA,PTPN2,ADAR,ELAC2,SIGMAR1,SPECC1L,PGGT1B,TBL3	0.0010978	82
Neighbors of Hereditary Diseases	Pathway	790	9	1	Hereditary Diseases	ATP7A,FAH,GCH1,GK,NF2,DMD,ADAR,PROS1,UNC13D	0.00122749	83
Neighbors of cytokinesis	Pathway	792	9	1	cytokinesis	NF2,TUBG1,SNAPIN,VAMP2,DMD,PAK1,NEK6,UNC119,SPECC1L	0.00124908	84
Neighbors of CXCR ligand	Pathway	63	3	4	CXCR ligand	CEBPB,ORMDL3,PGGT1B	0.00124935	85
Neighbors of acidemia	Pathway	15	2	12	acidemia	PCCA,PCCB	0.00125063	86
Neighbors of basophilia	Pathway	15	2	12	basophilia	JAK2,LYN	0.00125063	87
Neighbors of stem cell expansion	Pathway	141	4	2	stem cell expansion	NF2,SPP1,IL18,PTPN2	0.00127222	88
Neighbors of vesicle-mediated transport	Pathway	361	6	1	vesicle-mediated transport	NF2,STX18,VAMP2,RAB3D,ARFGAP1,YIPF3	0.00128739	89
Neighbors of Breast Cancer	Pathway	1887	15	0	Breast Cancer	ATP7A,CEBPB,PTPRE,CTCF,NF2,STK17B,ANGPTL4,SPP1,JAK2,PAK1,LYN,IL18,PTPRA,PTPN2,SH3GLB2	0.00131514	90
Neighbors of adipogenesis	Pathway	1146	11	0	adipogenesis	ACACA,GK,CEBPB,DMD,ANGPTL4,SPP1,JAK2,IL18,CTSH,YIPF3,LRRC8C	0.00141787	91
Neighbors of brain dysfunction	Pathway	66	3	4	brain dysfunction	ACACA,CEBPB,DMD	0.00142626	92
Neighbors of lymphocyte activation	Pathway	371	6	1	lymphocyte activation	PTPRE,SPP1,JAK2,LYN,IL18,ORMDL3	0.00147834	93
Neighbors of heart function	Pathway	1155	11	0	heart function	ATP6AP2,CEBPB,CUL7,DMD,SH2B2,ANGPTL4,SPP1,PAK1,NCS1,IL18,SIGMAR1	0.00150837	94
Neighbors of Blast Crisis	Pathway	68	3	4	Blast Crisis	JAK2,LYN,ADAR	0.0015525	95
Neighbors of lung carcinoma	Pathway	151	4	2	lung carcinoma	CEBPB,CTCF,SPP1,PGGT1B	0.00163352	96
Neighbors of DNA repair	Pathway	1352	12	0	DNA repair	YBX3,RAD50,RPS27,ANGPTL4,PAK1,DAXX,IL18,PTPN2,TRIP13,ADAR,PROS1,BRCC3	0.0016661	97
Neighbors of Cell Transformation, Neoplastic	Pathway	1354	12	0	Cell Transformation, Neoplastic	CEBPB,NF2,CUL7,SPP1,JAK2,PAK1,DAXX,NEK6,PTPRA,CTSH,ADAR,C15orf48	0.0016868	98
Neighbors of long-term synaptic potentiation	Pathway	997	10	1	long-term synaptic potentiation	DMD,JAK2,PAK1,NCS1,IL18,PTPRA,DLG3,HPCA,SIGMAR1,PGGT1B	0.00170253	99
Neighbors of breast metastasis	Pathway	259	5	1	breast metastasis	PTPRE,ANGPTL4,SPP1,PAK1,PTPRA	0.00172613	100

## Sheet: Unique Cortex-control
Name	Type	Total # of Neighbors	Overlap	Percent Overlap	Gene Set Seed	Overlapping Entities	p-value	#
Neighbors of cell death	Pathway	4895	10	0	cell death	FDFT1,UCK2,LPL,ITGAD,MARK2,RHOB,TMEM176B,CYP51A1,CYTH1,PDE12	0.000174413	1
Neighbors of Brain Injuries	Pathway	492	4	0	Brain Injuries	LPL,ITGAD,RHOB,RILPL1	0.000181974	2
Neighbors of hydroxymethylglutaryl-CoA reductase (NADPH)	Pathway	35	2	5	hydroxymethylglutaryl-CoA reductase (NADPH)	FDFT1,CYP51A1	0.000209379	3
Neighbors of hypolipemia	Pathway	47	2	4	hypolipemia	LPL,CYP51A1	0.000373293	4
Neighbors of Hyperlipidemia, Familial Combined	Pathway	52	2	3	Hyperlipidemia, Familial Combined	FDFT1,LPL	0.000455217	5
Neighbors of epithelial polarization	Pathway	58	2	3	epithelial polarization	MARK2,CYTH1	0.000564019	6
Neighbors of Hypercholesterolemia	Pathway	285	3	1	Hypercholesterolemia	FDFT1,LPL,CYP51A1	0.000622055	7
Neighbors of tubulin	Pathway	317	3	0	tubulin	MARK2,RHOB,MICU2	0.000845751	8
Neighbors of phagocytosis	Pathway	1346	5	0	phagocytosis	LPL,ITGAD,RHOB,CYTH1,VPS33B	0.000945449	9
Neighbors of tubulogenesis	Pathway	354	3	0	tubulogenesis	MARK2,RHOB,ALCAM	0.00116152	10
Neighbors of lipid absorption	Pathway	98	2	2	lipid absorption	LPL,VPS33B	0.00157656	11
Neighbors of protein targeting	Pathway	406	3	0	protein targeting	MARK2,CYTH1,VPS33B	0.0017183	12
Neighbors of cell spreading	Pathway	904	4	0	cell spreading	LPL,MARK2,RHOB,CYTH1	0.00177753	13
Neighbors of monocyte adhesion	Pathway	443	3	0	monocyte adhesion	LPL,CYTH1,ALCAM	0.00220133	14
Neighbors of leukocyte cell adhesion	Pathway	478	3	0	leukocyte cell adhesion	ITGAD,CYTH1,ALCAM	0.00272921	15
Neighbors of unspecific monooxygenase	Pathway	143	2	1	unspecific monooxygenase	LPL,CYP51A1	0.00329319	16
Neighbors of melanoma metastasis	Pathway	148	2	1	melanoma metastasis	RHOB,ALCAM	0.00352043	17
Neighbors of axonogenesis	Pathway	548	3	0	axonogenesis	ITGAD,MARK2,ALCAM	0.00400551	18
Neighbors of Coronary Arteriosclerosis	Pathway	159	2	1	Coronary Arteriosclerosis	FDFT1,LPL	0.0040455	19
Neighbors of stress fiber assembly	Pathway	599	3	0	stress fiber assembly	MARK2,RHOB,CYTH1	0.00513174	20
Neighbors of Atheroma	Pathway	184	2	1	Atheroma	FDFT1,LPL	0.00536536	21
Neighbors of neuronal migration	Pathway	612	3	0	neuronal migration	MARK2,ALCAM,MICU2	0.00544647	22
Neighbors of small monomeric GTPase	Pathway	620	3	0	small monomeric GTPase	FDFT1,RHOB,CYTH1	0.00564584	23
Neighbors of myelination	Pathway	620	3	0	myelination	FDFT1,LPL,CYTH1	0.00564584	24
Neighbors of hemato-encephalic barrier	Pathway	628	3	0	hemato-encephalic barrier	LPL,ITGAD,ALCAM	0.00584959	25
Neighbors of diapedesis	Pathway	197	2	1	diapedesis	CYTH1,ALCAM	0.00611986	26
Neighbors of microtubule cytoskeleton assembly	Pathway	644	3	0	microtubule cytoskeleton assembly	MARK2,RHOB,MICU2	0.00627034	27
Neighbors of dendritic cell migration	Pathway	216	2	0	dendritic cell migration	CYTH1,ALCAM	0.00730472	28
Neighbors of nerve cell differentiation	Pathway	1457	4	0	nerve cell differentiation	LPL,MARK2,RHOB,ALCAM	0.00972665	29
Neighbors of platelet formation	Pathway	251	2	0	platelet formation	LPL,VPS33B	0.00973615	30
Neighbors of polyadenylation	Pathway	252	2	0	polyadenylation	LPL,ALCAM	0.00981026	31
Neighbors of Dyslipidemias	Pathway	252	2	0	Dyslipidemias	LPL,CYP51A1	0.00981026	32
Neighbors of monocyte recruitment	Pathway	254	2	0	monocyte recruitment	LPL,ALCAM	0.00995924	33
Neighbors of lung adenocarcinoma	Pathway	257	2	0	lung adenocarcinoma	LPL,RHOB	0.0101846	34
Neighbors of cell differentiation	Pathway	6987	9	0	cell differentiation	LPL,MARK2,RHOB,TMEM176B,CYP51A1,CYTH1,DHRS7B,ALCAM,MICU2	0.0123154	35
Neighbors of muscle injury	Pathway	285	2	0	muscle injury	FDFT1,LPL	0.0123967	36
Neighbors of virulence	Pathway	838	3	0	virulence	FDFT1,CYP51A1,VPS33B	0.0128435	37
Neighbors of Hyperlipidemias	Pathway	294	2	0	Hyperlipidemias	FDFT1,LPL	0.0131487	38
Neighbors of cytoskeleton organization and biogenesis	Pathway	1613	4	0	cytoskeleton organization and biogenesis	MARK2,RHOB,CYP51A1,CYTH1	0.0137681	39
Neighbors of DNA degradation	Pathway	312	2	0	DNA degradation	RHOB,PDE12	0.0147113	40
Neighbors of phospholipase	Pathway	324	2	0	phospholipase	LPL,RHOB	0.0157958	41
Neighbors of thermogenesis	Pathway	336	2	0	thermogenesis	LPL,DHRS7B	0.0169139	42
Neighbors of myosin light chain	Pathway	337	2	0	myosin light chain	MARK2,RHOB	0.0170085	43
Neighbors of myosins	Pathway	379	2	0	myosins	MARK2,RHOB	0.0211889	44
Neighbors of leukocyte infiltration	Pathway	390	2	0	leukocyte infiltration	ITGAD,ALCAM	0.0223483	45
Neighbors of Muscular Diseases	Pathway	394	2	0	Muscular Diseases	FDFT1,LPL	0.0227763	46
Neighbors of T-cell response	Pathway	1058	3	0	T-cell response	LPL,ITGAD,TMEM176B	0.0237963	47
Neighbors of metaphase	Pathway	420	2	0	metaphase	MARK2,MICU2	0.0256415	48
Neighbors of lumen formation	Pathway	1105	3	0	lumen formation	MARK2,RHOB,ALCAM	0.0266364	49
Neighbors of endocytosis	Pathway	1976	4	0	endocytosis	LPL,RHOB,CYTH1,ALCAM	0.0269988	50
Neighbors of adipogenesis	Pathway	1146	3	0	adipogenesis	LPL,MARK2,DHRS7B	0.0292588	51
Neighbors of cell motility	Pathway	2074	4	0	cell motility	LPL,RHOB,CYTH1,ALCAM	0.0315624	52
Neighbors of Encephalomyelitis, Autoimmune, Experimental	Pathway	472	2	0	Encephalomyelitis, Autoimmune, Experimental	LPL,ALCAM	0.0317883	53
Neighbors of cytokine	Pathway	487	2	0	cytokine	RHOB,CYTH1	0.0336606	54
Neighbors of actins	Pathway	1212	3	0	actins	MARK2,RHOB,CYTH1	0.0337639	55
Neighbors of phospholipase D	Pathway	493	2	0	phospholipase D	RHOB,CYTH1	0.0344216	56
Neighbors of leukocyte migration	Pathway	505	2	0	leukocyte migration	ITGAD,ALCAM	0.0359639	57
Neighbors of cell interaction	Pathway	514	2	0	cell interaction	LPL,ALCAM	0.0371383	58
Neighbors of neutrophil migration	Pathway	525	2	0	neutrophil migration	ITGAD,CYTH1	0.0385939	59
Neighbors of acidification	Pathway	542	2	0	acidification	LPL,VPS33B	0.0408864	60
Neighbors of secretory pathway	Pathway	564	2	0	secretory pathway	LPL,CYTH1	0.0439292	61
Neighbors of Injuries	Pathway	2341	4	0	Injuries	LPL,ITGAD,RHOB,MICU2	0.0462576	62
Neighbors of Glioblastoma	Pathway	584	2	0	Glioblastoma	RHOB,ALCAM	0.0467679	63

## Sheet: Cluster 2
Name	Type	Total # of Neighbors	Overlap	Percent Overlap	Gene Set Seed	Overlapping Entities	p-value	#
Neighbors of viral reproduction	Pathway	1447	12	0	viral reproduction	NOS2,PTGS2,ARHGEF2,TAP1,HSPA8,OASL,MSN,PAK2,IL1B,EIF2AK2,MX1,SERPINB2	1.05956e-12	1
Neighbors of Virus Diseases	Pathway	955	10	1	Virus Diseases	NOS2,PTGS2,TAP1,HSPA8,OASL,MSN,IL1B,EIF2AK2,MX1,SERPINB2	1.97144e-11	2
Neighbors of mitosis	Pathway	2233	12	0	mitosis	ACSL1,NOS2,PTGS2,ARHGEF2,TAP1,HSPA8,MSN,PAK2,IL1B,EIF2AK2,MX1,SERPINB2	1.69578e-10	3
Neighbors of Carcinoma, Hepatocellular	Pathway	1452	10	0	Carcinoma, Hepatocellular	ACSL4,NOS2,PTGS2,TXNRD1,HSPA8,MSN,PAK2,IL1B,EIF2AK2,MX1	1.17223e-09	4
Neighbors of immune response	Pathway	2703	12	0	immune response	SLC7A2,NOS2,PTGS2,ARHGEF2,TAP1,HSPA8,OASL,MSN,IL1B,EIF2AK2,MX1,SERPINB2	1.54382e-09	5
Neighbors of cell death	Pathway	4895	14	0	cell death	BCAT1,ACSL1,NOS2,PTGS2,TXNRD1,ARHGEF2,HSPA8,OASL,MSN,PAK2,IL1B,EIF2AK2,MX1,SERPINB2	6.58526e-09	6
Neighbors of adaptive immune response	Pathway	857	8	0	adaptive immune response	SLC7A2,NOS2,PTGS2,TAP1,HSPA8,IL1B,EIF2AK2,SERPINB2	9.16814e-09	7
Neighbors of apoptosis	Pathway	7607	16	0	apoptosis	BCAT1,ACSL1,ACSL4,NOS2,PTGS2,TXNRD1,ARHGEF2,TAP1,HSPA8,OASL,MSN,PAK2,IL1B,EIF2AK2,MX1,SERPINB2	1.00419e-08	8
Neighbors of Lupus Erythematosus, Systemic	Pathway	538	7	1	Lupus Erythematosus, Systemic	NOS2,PTGS2,HSPA8,OASL,IL1B,EIF2AK2,MX1	1.02748e-08	9
Neighbors of cell growth	Pathway	5082	14	0	cell growth	BCAT1,ACSL1,ACSL4,NOS2,PTGS2,TXNRD1,ARHGEF2,HSPA8,MSN,PAK2,IL1B,EIF2AK2,MX1,SERPINB2	1.08559e-08	10
Neighbors of Neoplasms	Pathway	5248	14	0	Neoplasms	ACSL1,ACSL4,NOS2,PTGS2,TXNRD1,ARHGEF2,TAP1,HSPA8,MSN,PAK2,IL1B,EIF2AK2,MX1,SERPINB2	1.66489e-08	11
Neighbors of response to viruses	Pathway	336	6	1	response to viruses	NOS2,TAP1,HSPA8,IL1B,EIF2AK2,MX1	2.22368e-08	12
Neighbors of immunity	Pathway	1435	9	0	immunity	SLC7A2,NOS2,PTGS2,TAP1,HSPA8,IL1B,EIF2AK2,MX1,SERPINB2	2.49984e-08	13
Neighbors of T-cell response	Pathway	1058	8	0	T-cell response	SLC7A2,ACSL1,NOS2,PTGS2,TAP1,HSPA8,MSN,IL1B	4.69168e-08	14
Neighbors of Warm Ischemia	Pathway	65	4	6	Warm Ischemia	NOS2,PTGS2,HSPA8,IL1B	5.01091e-08	15
Neighbors of Lung Injury	Pathway	681	7	1	Lung Injury	NOS2,PTGS2,TXNRD1,ARHGEF2,TAP1,MSN,IL1B	5.14874e-08	16
Neighbors of cell survival	Pathway	3701	12	0	cell survival	BCAT1,ACSL4,NOS2,PTGS2,TXNRD1,ARHGEF2,HSPA8,MSN,PAK2,IL1B,EIF2AK2,SERPINB2	5.57068e-08	17
Neighbors of Glycan catabolism	Pathway	72	4	5	Glycan catabolism	NOS2,PTGS2,IL1B,EIF2AK2	7.54887e-08	18
Neighbors of antigen processing and presentation	Pathway	736	7	0	antigen processing and presentation	NOS2,PTGS2,TAP1,HSPA8,PAK2,IL1B,EIF2AK2	8.73285e-08	19
Neighbors of Cancer of Esophagus	Pathway	212	5	2	Cancer of Esophagus	NOS2,PTGS2,TAP1,HSPA8,IL1B	1.01303e-07	20
Neighbors of Injuries	Pathway	2341	10	0	Injuries	ACSL4,NOS2,PTGS2,TXNRD1,ARHGEF2,HSPA8,MSN,IL1B,EIF2AK2,MX1	1.13388e-07	21
Neighbors of inflammatory response	Pathway	2342	10	0	inflammatory response	SLC7A2,ACSL4,NOS2,PTGS2,TXNRD1,HSPA8,MSN,IL1B,EIF2AK2,SERPINB2	1.13847e-07	22
Neighbors of Hepatitis B, Chronic	Pathway	84	4	4	Hepatitis B, Chronic	ACSL1,NOS2,PTGS2,MX1	1.39839e-07	23
Neighbors of ulcer healing	Pathway	85	4	4	ulcer healing	NOS2,PTGS2,HSPA8,IL1B	1.46609e-07	24
Neighbors of Infection	Pathway	2524	10	0	Infection	NOS2,PTGS2,ARHGEF2,HSPA8,OASL,MSN,PAK2,IL1B,EIF2AK2,MX1	2.30426e-07	25
Neighbors of Breast Cancer	Pathway	1887	9	0	Breast Cancer	ACSL4,NOS2,PTGS2,ARHGEF2,MSN,PAK2,IL1B,EIF2AK2,SERPINB2	2.61849e-07	26
Neighbors of T-cell activation	Pathway	1343	8	0	T-cell activation	NOS2,PTGS2,TXNRD1,TAP1,MSN,PAK2,IL1B,EIF2AK2	2.92577e-07	27
Neighbors of colon adenoma	Pathway	23	3	12	colon adenoma	NOS2,PTGS2,TXNRD1	3.03441e-07	28
Neighbors of Cell Transformation, Neoplastic	Pathway	1354	8	0	Cell Transformation, Neoplastic	ACSL4,NOS2,PTGS2,TXNRD1,ARHGEF2,HSPA8,IL1B,EIF2AK2	3.11355e-07	29
Neighbors of internalization	Pathway	1936	9	0	internalization	ACSL1,NOS2,PTGS2,TAP1,HSPA8,MSN,PAK2,IL1B,SERPINB2	3.25628e-07	30
Neighbors of Cancer	Pathway	4357	12	0	Cancer	BCAT1,ACSL4,NOS2,PTGS2,TXNRD1,TAP1,HSPA8,MSN,IL1B,EIF2AK2,MX1,SERPINB2	3.47947e-07	31
Neighbors of protein synthesis	Pathway	1952	9	0	protein synthesis	BCAT1,NOS2,PTGS2,TXNRD1,HSPA8,PAK2,IL1B,EIF2AK2,MX1	3.49208e-07	32
Neighbors of cell invasion	Pathway	1985	9	0	cell invasion	BCAT1,NOS2,PTGS2,ARHGEF2,MSN,PAK2,IL1B,EIF2AK2,SERPINB2	4.02601e-07	33
Neighbors of blood-retinal barrier	Pathway	110	4	3	blood-retinal barrier	BCAT1,NOS2,PTGS2,IL1B	4.09856e-07	34
Neighbors of response to stress	Pathway	560	6	1	response to stress	NOS2,PTGS2,TXNRD1,HSPA8,IL1B,EIF2AK2	4.47895e-07	35
Neighbors of nasopharynx carcinoma	Pathway	288	5	1	nasopharynx carcinoma	BCAT1,NOS2,PTGS2,TAP1,IL1B	4.59598e-07	36
Neighbors of ear edema	Pathway	27	3	10	ear edema	NOS2,PTGS2,IL1B	4.90449e-07	37
Neighbors of hemorrhagic cystitis	Pathway	27	3	10	hemorrhagic cystitis	NOS2,PTGS2,IL1B	4.90449e-07	38
Neighbors of macrophage apoptosis	Pathway	299	5	1	macrophage apoptosis	NOS2,PTGS2,IL1B,EIF2AK2,SERPINB2	5.52612e-07	39
Neighbors of cell motility	Pathway	2074	9	0	cell motility	NOS2,PTGS2,ARHGEF2,HSPA8,MSN,PAK2,EIF2AK2,MX1,SERPINB2	5.83716e-07	40
Neighbors of protein amino acid oxidation	Pathway	124	4	3	protein amino acid oxidation	NOS2,PTGS2,TXNRD1,IL1B	6.59969e-07	41
Neighbors of dendritic cell differentiation	Pathway	600	6	0	dendritic cell differentiation	NOS2,PTGS2,HSPA8,OASL,PAK2,IL1B	6.69501e-07	42
Neighbors of liver metastasis	Pathway	318	5	1	liver metastasis	NOS2,PTGS2,IL1B,MX1,SERPINB2	7.47858e-07	43
Neighbors of neutrophil adhesion	Pathway	320	5	1	neutrophil adhesion	NOS2,PTGS2,TXNRD1,ARHGEF2,IL1B	7.71223e-07	44
Neighbors of cytolysis	Pathway	616	6	0	cytolysis	NOS2,PTGS2,ARHGEF2,TAP1,IL1B,SERPINB2	7.80239e-07	45
Neighbors of innate immune response	Pathway	1541	8	0	innate immune response	SLC7A2,ACSL1,NOS2,PTGS2,IL1B,EIF2AK2,MX1,SERPINB2	8.31824e-07	46
Neighbors of Encephalitis	Pathway	325	5	1	Encephalitis	NOS2,PTGS2,IL1B,EIF2AK2,MX1	8.32167e-07	47
Neighbors of S phase	Pathway	1548	8	0	S phase	ACSL1,NOS2,PTGS2,TAP1,HSPA8,IL1B,EIF2AK2,SERPINB2	8.6084e-07	48
Neighbors of Heart Injuries	Pathway	328	5	1	Heart Injuries	NOS2,PTGS2,HSPA8,IL1B,EIF2AK2	8.70521e-07	49
Neighbors of Esophagitis	Pathway	35	3	8	Esophagitis	NOS2,PTGS2,IL1B	1.06591e-06	50
Neighbors of Scrapie	Pathway	36	3	8	Scrapie	NOS2,PTGS2,IL1B	1.15956e-06	51
Neighbors of Ileus	Pathway	37	3	7	Ileus	NOS2,PTGS2,IL1B	1.2585e-06	52
Neighbors of white matter injury	Pathway	37	3	7	white matter injury	NOS2,PTGS2,IL1B	1.2585e-06	53
Neighbors of brain development	Pathway	1097	7	0	brain development	BCAT1,ACSL4,NOS2,PTGS2,TXNRD1,MSN,IL1B	1.28481e-06	54
Neighbors of Wounds	Pathway	674	6	0	Wounds	ACSL4,NOS2,PTGS2,ARHGEF2,MSN,IL1B	1.31527e-06	55
Neighbors of Cancer of Liver	Pathway	681	6	0	Cancer of Liver	ACSL4,NOS2,PTGS2,TXNRD1,IL1B,EIF2AK2	1.39638e-06	56
Neighbors of Demyelinating Diseases	Pathway	155	4	2	Demyelinating Diseases	NOS2,PTGS2,IL1B,MX1	1.59903e-06	57
Neighbors of retina injury	Pathway	160	4	2	retina injury	NOS2,HSPA8,IL1B,EIF2AK2	1.81311e-06	58
Neighbors of actin organization	Pathway	1720	8	0	actin organization	NOS2,PTGS2,ARHGEF2,HSPA8,MSN,PAK2,IL1B,EIF2AK2	1.9048e-06	59
Neighbors of Prostatitis	Pathway	43	3	6	Prostatitis	NOS2,PTGS2,IL1B	1.97159e-06	60
Neighbors of Cachexia	Pathway	164	4	2	Cachexia	NOS2,PTGS2,IL1B,EIF2AK2	1.99914e-06	61
Neighbors of Tuberculosis	Pathway	390	5	1	Tuberculosis	NOS2,TAP1,HSPA8,IL1B,EIF2AK2	2.03043e-06	62
Neighbors of neuron apoptosis	Pathway	414	5	1	neuron apoptosis	NOS2,PTGS2,HSPA8,IL1B,EIF2AK2	2.7166e-06	63
Neighbors of neutrophilia	Pathway	179	4	2	neutrophilia	SLC7A2,NOS2,PTGS2,IL1B	2.82513e-06	64
Neighbors of mRNA degradation	Pathway	419	5	1	mRNA degradation	NOS2,PTGS2,IL1B,EIF2AK2,SERPINB2	2.88014e-06	65
Neighbors of cellular immune response	Pathway	772	6	0	cellular immune response	NOS2,PTGS2,TAP1,HSPA8,IL1B,EIF2AK2	2.88112e-06	66
Neighbors of T-cell recruitment	Pathway	182	4	2	T-cell recruitment	NOS2,PTGS2,IL1B,EIF2AK2	3.01672e-06	67
Neighbors of Cerebral Aneurysm	Pathway	50	3	5	Cerebral Aneurysm	NOS2,PTGS2,IL1B	3.0925e-06	68
Neighbors of Gastroesophageal Reflux	Pathway	50	3	5	Gastroesophageal Reflux	NOS2,PTGS2,IL1B	3.0925e-06	69
Neighbors of bacterial load	Pathway	185	4	2	bacterial load	NOS2,PTGS2,IL1B,EIF2AK2	3.21778e-06	70
Neighbors of luteolysis	Pathway	185	4	2	luteolysis	NOS2,PTGS2,IL1B,SERPINB2	3.21778e-06	71
Neighbors of ileum contraction	Pathway	51	3	5	ileum contraction	NOS2,PTGS2,IL1B	3.28068e-06	72
Neighbors of liver toxicity	Pathway	435	5	1	liver toxicity	ACSL1,NOS2,PTGS2,TXNRD1,IL1B	3.45623e-06	73
Neighbors of postoperative ileus	Pathway	52	3	5	postoperative ileus	NOS2,PTGS2,IL1B	3.47629e-06	74
Neighbors of mRNA stabilization	Pathway	189	4	2	mRNA stabilization	NOS2,PTGS2,IL1B,EIF2AK2	3.50111e-06	75
Neighbors of digestive system inflammation	Pathway	54	3	5	digestive system inflammation	NOS2,PTGS2,IL1B	3.89039e-06	76
Neighbors of cell cycle progression	Pathway	2619	9	0	cell cycle progression	BCAT1,NOS2,PTGS2,ARHGEF2,HSPA8,PAK2,IL1B,EIF2AK2,SERPINB2	4.12407e-06	77
Neighbors of Kidney Tubular Necrosis, Acute	Pathway	56	3	5	Kidney Tubular Necrosis, Acute	NOS2,PTGS2,IL1B	4.3359e-06	78
Neighbors of glycoprotein biosynthesis	Pathway	57	3	5	glycoprotein biosynthesis	NOS2,IL1B,MX1	4.57079e-06	79
Neighbors of cell proliferation	Pathway	8093	14	0	cell proliferation	BCAT1,ACSL1,ACSL4,NOS2,PTGS2,TXNRD1,ARHGEF2,TAP1,HSPA8,MSN,PAK2,IL1B,EIF2AK2,SERPINB2	4.76494e-06	80
Neighbors of sciatic nerve injury	Pathway	58	3	5	sciatic nerve injury	NOS2,PTGS2,IL1B	4.81396e-06	81
Neighbors of Cerebral Hemorrhage	Pathway	205	4	1	Cerebral Hemorrhage	NOS2,PTGS2,PAK2,IL1B	4.82271e-06	82
Neighbors of chromosome condensation	Pathway	467	5	1	chromosome condensation	NOS2,PTGS2,PAK2,IL1B,EIF2AK2	4.87895e-06	83
Neighbors of tooth movement	Pathway	59	3	5	tooth movement	PTGS2,IL1B,SERPINB2	5.06554e-06	84
Neighbors of epithelial cell permeability	Pathway	208	4	1	epithelial cell permeability	NOS2,PTGS2,ARHGEF2,IL1B	5.10661e-06	85
Neighbors of defense response	Pathway	474	5	1	defense response	NOS2,PTGS2,ARHGEF2,IL1B,EIF2AK2	5.24398e-06	86
Neighbors of chondrocyte function	Pathway	60	3	4	chondrocyte function	NOS2,PTGS2,IL1B	5.32567e-06	87
Neighbors of endocytosis	Pathway	1976	8	0	endocytosis	NOS2,PTGS2,TXNRD1,HSPA8,PAK2,IL1B,MX1,SERPINB2	5.37164e-06	88
Neighbors of Neoplasm Metastasis	Pathway	2704	9	0	Neoplasm Metastasis	NOS2,PTGS2,TXNRD1,ARHGEF2,HSPA8,MSN,IL1B,MX1,SERPINB2	5.3733e-06	89
Neighbors of Brain Diseases	Pathway	214	4	1	Brain Diseases	ACSL4,NOS2,PTGS2,IL1B	5.7113e-06	90
Neighbors of Leukostasis	Pathway	62	3	4	Leukostasis	NOS2,PTGS2,IL1B	5.87214e-06	91
Neighbors of gastric mucosal damage	Pathway	62	3	4	gastric mucosal damage	NOS2,PTGS2,IL1B	5.87214e-06	92
Neighbors of oocyte maturation	Pathway	486	5	1	oocyte maturation	ACSL1,NOS2,PTGS2,PAK2,IL1B	5.91942e-06	93
Neighbors of uterine cervix ripening	Pathway	63	3	4	uterine cervix ripening	NOS2,PTGS2,IL1B	6.15876e-06	94
Neighbors of Bowel Dysfunction	Pathway	6	2	28	Bowel Dysfunction	NOS2,PTGS2	6.30998e-06	95
Neighbors of Osteophyte	Pathway	65	3	4	Osteophyte	NOS2,PTGS2,IL1B	6.75946e-06	96
Neighbors of Hypovolemia	Pathway	66	3	4	Hypovolemia	NOS2,PTGS2,IL1B	7.07381e-06	97
Neighbors of mesenteric circulation	Pathway	67	3	4	mesenteric circulation	NOS2,PTGS2,IL1B	7.39768e-06	98
Neighbors of Duodenal Ulcer	Pathway	68	3	4	Duodenal Ulcer	NOS2,PTGS2,IL1B	7.73121e-06	99
Neighbors of Liver Cirrhosis, Alcoholic	Pathway	68	3	4	Liver Cirrhosis, Alcoholic	NOS2,PTGS2,IL1B	7.73121e-06	100

## Sheet: cluster3
Name	Type	Total # of Neighbors	Overlap	Percent Overlap	Gene Set Seed	Overlapping Entities	p-value	#
Neighbors of embryo implantation	Pathway	376	4	1	embryo implantation	HSPH1,DDX39A,RHOA,TPT1	1.75298e-05	1
Neighbors of viral reproduction	Pathway	1447	6	0	viral reproduction	HSP90AA1,DDX39A,EEF1G,RHOA,TPT1,USP7	1.90234e-05	2
Neighbors of tumor suppressor protein	Pathway	139	3	2	tumor suppressor protein	RHOA,TPT1,USP7	2.91044e-05	3
Neighbors of heat shock protein 90	Pathway	191	3	1	heat shock protein 90	HSPH1,HSP90AA1,PCMT1	7.45028e-05	4
Neighbors of anti-oncogene	Pathway	628	4	0	anti-oncogene	WARS,RHOA,TPT1,USP7	0.000128268	5
Neighbors of cyclopia	Pathway	41	2	4	cyclopia	HSP90AA1,RHOA	0.000152591	6
Neighbors of myofibril assembly	Pathway	47	2	4	myofibril assembly	HSP90AA1,RHOA	0.00019961	7
Neighbors of G-actin	Pathway	81	2	2	G-actin	RHOA,TPT1	0.000582691	8
Neighbors of response to DNA damage	Pathway	1078	4	0	response to DNA damage	HSP90AA1,DDX39A,TPT1,USP7	0.000994599	9
Neighbors of protein ubiquitination	Pathway	1960	5	0	protein ubiquitination	HSPH1,HSP90AA1,RHOA,TPT1,USP7	0.00109635	10
Neighbors of Cancer	Pathway	4357	7	0	Cancer	WARS,HSPH1,HSP90AA1,RHOA,GNB1,TPT1,USP7	0.0012579	11
Neighbors of wall integrity	Pathway	124	2	1	wall integrity	HSPH1,RHOA	0.0013452	12
Neighbors of endothelial cell chemotaxis	Pathway	132	2	1	endothelial cell chemotaxis	WARS,RHOA	0.00152059	13
Neighbors of Neuroblastoma	Pathway	563	3	0	Neuroblastoma	HSP90AA1,EEF1G,USP7	0.00173253	14
Neighbors of mitosis	Pathway	2233	5	0	mitosis	DDX39A,RHOA,TPT1,USP7,PCMT1	0.00196865	15
Neighbors of Multiple Sclerosis	Pathway	614	3	0	Multiple Sclerosis	HSPH1,DDX39A,RHOA	0.00221771	16
Neighbors of DNA repair	Pathway	1352	4	0	DNA repair	WARS,HSP90AA1,TPT1,USP7	0.00229524	17
Neighbors of mitogen-activated protein kinase	Pathway	2316	5	0	mitogen-activated protein kinase	HSPH1,RHOA,GNB1,TPT1,USP7	0.00231516	18
Neighbors of nuclear import	Pathway	640	3	0	nuclear import	HSP90AA1,RHOA,LRRC59	0.00249462	19
Neighbors of neural tube closure	Pathway	184	2	1	neural tube closure	RHOA,GNB1	0.00291015	20
Neighbors of eosinophil migration	Pathway	192	2	1	eosinophil migration	RHOA,TPT1	0.00316165	21
Neighbors of Infection	Pathway	2524	5	0	Infection	HSP90AA1,RHOA,TPT1,USP7,FAR1	0.00338156	22
Neighbors of reproduction	Pathway	723	3	0	reproduction	HSPH1,TPT1,FAR1	0.00351971	23
Neighbors of Functional impairment	Pathway	227	2	0	Functional impairment	RHOA,PCMT1	0.00437732	24
Neighbors of immune response	Pathway	2703	5	0	immune response	WARS,HSPH1,RHOA,TPT1,USP7	0.0045572	25
Neighbors of chronic kidney disease	Pathway	249	2	0	chronic kidney disease	HSP90AA1,RHOA	0.00523593	26
Neighbors of DNA fragmentation	Pathway	838	3	0	DNA fragmentation	HSP90AA1,RHOA,TPT1	0.00531897	27
Neighbors of embryonal development	Pathway	2849	5	0	embryonal development	DRAP1,HSPH1,HSP90AA1,RHOA,TPT1	0.00571761	28
Neighbors of blood vessel contraction	Pathway	276	2	0	blood vessel contraction	RHOA,TPT1	0.00638715	29
Neighbors of histone	Pathway	909	3	0	histone	HSP90AA1,GNB1,USP7	0.00666437	30
Neighbors of colony formation	Pathway	1836	4	0	colony formation	HSP90AA1,DDX39A,TPT1,USP7	0.00689543	31
Neighbors of endothelial cell activation	Pathway	302	2	0	endothelial cell activation	WARS,RHOA	0.00759524	32
Neighbors of apoptosis	Pathway	7607	8	0	apoptosis	WARS,HSPH1,HSP90AA1,RHOA,GNB1,TPT1,USP7,PCMT1	0.00764344	33
Neighbors of Ras	Pathway	963	3	0	Ras	RHOA,GNB1,TPT1	0.00781336	34
Neighbors of keratinocyte migration	Pathway	308	2	0	keratinocyte migration	HSP90AA1,RHOA	0.00788767	35
Neighbors of smooth muscle cell apoptosis	Pathway	310	2	0	smooth muscle cell apoptosis	RHOA,TPT1	0.00798628	36
Neighbors of protein aggregation	Pathway	312	2	0	protein aggregation	HSPH1,HSP90AA1	0.00808544	37
Neighbors of Rac GTPase	Pathway	320	2	0	Rac GTPase	RHOA,TPT1	0.00848771	38
Neighbors of protein synthesis	Pathway	1952	4	0	protein synthesis	WARS,EEF1G,RHOA,TPT1	0.008551	39
Neighbors of drug susceptibility	Pathway	334	2	0	drug susceptibility	HSP90AA1,RHOA	0.00921308	40
Neighbors of lipid storage	Pathway	1043	3	0	lipid storage	RHOA,USP7,PCMT1	0.00972207	41
Neighbors of oncogenesis	Pathway	1067	3	0	oncogenesis	HSP90AA1,RHOA,USP7	0.0103439	42
Neighbors of fibroblast migration	Pathway	370	2	0	fibroblast migration	HSP90AA1,RHOA	0.0112015	43
Neighbors of cell proliferation	Pathway	8093	8	0	cell proliferation	WARS,HSPH1,HSP90AA1,DDX39A,RHOA,TPT1,USP7,PCMT1	0.011335	44
Neighbors of neuron toxicity	Pathway	1108	3	0	neuron toxicity	WARS,HSPH1,RHOA	0.0114595	45
Neighbors of Colorectal Carcinoma	Pathway	392	2	0	Colorectal Carcinoma	RHOA,TPT1	0.0125023	46
Neighbors of tumor microenvironment	Pathway	393	2	0	tumor microenvironment	WARS,TPT1	0.012563	47
Neighbors of cell damage	Pathway	1151	3	0	cell damage	WARS,RHOA,TPT1	0.0127029	48
Neighbors of neuron apoptosis	Pathway	414	2	0	neuron apoptosis	HSPH1,RHOA	0.0138666	49
Neighbors of Injuries	Pathway	2341	4	0	Injuries	HSPH1,RHOA,TPT1,PCMT1	0.0159966	50
Neighbors of proteasome endopeptidase complex	Pathway	449	2	0	proteasome endopeptidase complex	HSP90AA1,GNB1	0.0161652	51
Neighbors of oxidative stress	Pathway	2356	4	0	oxidative stress	HSP90AA1,EEF1G,TPT1,USP7	0.0163469	52
Neighbors of cell stress	Pathway	458	2	0	cell stress	HSPH1,GNB1	0.0167812	53
Neighbors of Diabetic Nephropathies	Pathway	459	2	0	Diabetic Nephropathies	RHOA,TPT1	0.0168503	54
Neighbors of Vasculitis	Pathway	460	2	0	Vasculitis	RHOA,TPT1	0.0169195	55
Neighbors of Multiple Myeloma	Pathway	466	2	0	Multiple Myeloma	HSP90AA1,USP7	0.0173373	56
Neighbors of Prostate Cancer	Pathway	1305	3	0	Prostate Cancer	EEF1G,RHOA,TPT1	0.0177853	57
Neighbors of Nerve Degeneration	Pathway	1309	3	0	Nerve Degeneration	WARS,RHOA,TPT1	0.0179306	58
Neighbors of oocyte maturation	Pathway	486	2	0	oocyte maturation	HSP90AA1,GNB1	0.0187617	59
Neighbors of cell cycle regulation	Pathway	1333	3	0	cell cycle regulation	HSP90AA1,RHOA,TPT1	0.0188168	60
Neighbors of ubiquitin-protein ligase	Pathway	490	2	0	ubiquitin-protein ligase	TPT1,USP7	0.0190524	61
Neighbors of B lymphocyte proliferation	Pathway	490	2	0	B lymphocyte proliferation	RHOA,TPT1	0.0190524	62
Neighbors of protein folding	Pathway	493	2	0	protein folding	HSPH1,HSP90AA1	0.0192718	63
Neighbors of Cell Transformation, Neoplastic	Pathway	1354	3	0	Cell Transformation, Neoplastic	HSP90AA1,RHOA,USP7	0.0196124	64
Neighbors of spindle assembly	Pathway	502	2	0	spindle assembly	HSPH1,RHOA	0.0199362	65
Neighbors of cell migration	Pathway	3873	5	0	cell migration	HSP90AA1,RHOA,GNB1,TPT1,PCMT1	0.0205325	66
Neighbors of Hypertension, Pulmonary	Pathway	512	2	0	Hypertension, Pulmonary	HSP90AA1,RHOA	0.0206859	67
Neighbors of chemotaxis	Pathway	1408	3	0	chemotaxis	HSP90AA1,RHOA,TPT1	0.021745	68
Neighbors of endothelial cell apoptosis	Pathway	529	2	0	endothelial cell apoptosis	RHOA,PCMT1	0.0219874	69
Neighbors of life span	Pathway	1415	3	0	life span	HSPH1,RHOA,PCMT1	0.0220307	70
Neighbors of genome stability	Pathway	545	2	0	genome stability	TPT1,USP7	0.0232432	71
Neighbors of cell cycle progression	Pathway	2619	4	0	cell cycle progression	HSP90AA1,RHOA,TPT1,USP7	0.0233131	72
Neighbors of neointima	Pathway	551	2	0	neointima	RHOA,TPT1	0.0237217	73
Neighbors of secretory pathway	Pathway	564	2	0	secretory pathway	HSP90AA1,TPT1	0.0247727	74
Neighbors of gastrulation	Pathway	569	2	0	gastrulation	DRAP1,RHOA	0.0251821	75
Neighbors of Neoplasm Metastasis	Pathway	2704	4	0	Neoplasm Metastasis	WARS,HSP90AA1,RHOA,TPT1	0.0259102	76
Neighbors of DNA Damage	Pathway	1542	3	0	DNA Damage	RHOA,TPT1,USP7	0.0275806	77
Neighbors of chemosensitivity	Pathway	601	2	0	chemosensitivity	RHOA,USP7	0.027868	78
Neighbors of Epilepsy	Pathway	604	2	0	Epilepsy	RHOA,PCMT1	0.0281256	79
Neighbors of neuronal migration	Pathway	612	2	0	neuronal migration	HSP90AA1,RHOA	0.0288174	80
Neighbors of organogenesis	Pathway	615	2	0	organogenesis	HSPH1,TPT1	0.0290786	81
Neighbors of autophagy	Pathway	1581	3	0	autophagy	HSP90AA1,EEF1G,RHOA	0.0294253	82
Neighbors of K+ channel	Pathway	636	2	0	K+ channel	RHOA,GNB1	0.0309342	83
Neighbors of cytoskeleton organization and biogenesis	Pathway	1613	3	0	cytoskeleton organization and biogenesis	WARS,RHOA,TPT1	0.0309882	84
Neighbors of smooth muscle cell migration	Pathway	650	2	0	smooth muscle cell migration	RHOA,TPT1	0.0321973	85
Neighbors of cell motion	Pathway	663	2	0	cell motion	HSP90AA1,RHOA	0.0333886	86
Neighbors of Wounds	Pathway	674	2	0	Wounds	HSP90AA1,RHOA	0.0344104	87
Neighbors of Cancer of Liver	Pathway	681	2	0	Cancer of Liver	HSPH1,RHOA	0.035067	88
Neighbors of gene silencing	Pathway	684	2	0	gene silencing	RHOA,USP7	0.03535	89
Neighbors of lung metastasis	Pathway	686	2	0	lung metastasis	HSP90AA1,RHOA	0.0355391	90
Neighbors of Hyperglycemia	Pathway	693	2	0	Hyperglycemia	RHOA,TPT1	0.0362043	91
Neighbors of actin organization	Pathway	1720	3	0	actin organization	EEF1G,RHOA,TPT1	0.0365368	92
Neighbors of regulation of cell size	Pathway	707	2	0	regulation of cell size	RHOA,TPT1	0.0375495	93
Neighbors of thrombocyte aggregation	Pathway	709	2	0	thrombocyte aggregation	RHOA,TPT1	0.0377433	94
Neighbors of histone H3	Pathway	710	2	0	histone H3	HSP90AA1,RHOA	0.0378403	95
Neighbors of degranulation	Pathway	716	2	0	degranulation	RHOA,TPT1	0.0384246	96
Neighbors of Encephalomyelitis	Pathway	718	2	0	Encephalomyelitis	HSPH1,RHOA	0.0386202	97
Neighbors of blood vessel development	Pathway	726	2	0	blood vessel development	WARS,RHOA	0.0394063	98
Neighbors of antigen processing and presentation	Pathway	736	2	0	antigen processing and presentation	HSP90AA1,RHOA	0.0403978	99
Neighbors of ER unfolded protein response	Pathway	744	2	0	ER unfolded protein response	HSPH1,HSP90AA1	0.041198	100

## Sheet: unique spinal cord lps
Name	Type	Total # of Neighbors	Overlap	Percent Overlap	Gene Set Seed	Overlapping Entities	p-value	#
Neighbors of apoptosis	Pathway	7607	45	0	apoptosis	MAT1A,UGT1A1,NUDT2,IMPDH1,SDHD,DGAT1,CD59,SDC4,HTT,BYSL,DNM1,DNM2,CLIP1,HDAC3,NOLC1,TPM1,KIF1B,KHDRBS3,CELF2,COL2A1,LUM,GGT1,KNG1,GSK3A,TOLLIP,TAOK2,MAPK13,CAMK2A,YES1,PPP3CB,RGS10,CDK9,CR1L,SERPING1,IREB2,NUDT1,GSTM3,NAT1,GRID2,RABGGTA,ANK3,THOC6,FBXL20,HOMER3,FAM105A	5.0794e-10	1
Neighbors of actins	Pathway	1212	15	1	actins	CD59,SDC4,HTT,DNM2,HDAC3,LUM,KNG1,TAOK2,CAMK2A,YES1,IREB2,NAT1,ANK3,MICALL2,MITD1	3.02646e-07	2
Neighbors of endocytosis	Pathway	1976	18	0	endocytosis	CD59,COLEC12,SDC4,HTT,DNM1,DNM2,CLIP1,STRN,TPM1,KNG1,TOLLIP,PIK3R4,YES1,PPP3CB,PIP4K2B,INPP4A,GRID2,FAM21C	1.49588e-06	3
Neighbors of vesicular trafficking	Pathway	441	9	2	vesicular trafficking	RAB13,HTT,DNM1,DNM2,STRN,KIF1B,TOLLIP,PIK3R4,RABGGTA	1.69307e-06	4
Neighbors of cell proliferation	Pathway	8093	40	0	cell proliferation	ENO3,MAT1A,GALNT7,NUDT2,NDUFA5,SDHD,DGAT1,CD59,SDC4,HTT,BYSL,DNM1,DNM2,CLIP1,HDAC3,NOLC1,TPM1,KHDRBS3,MYH4,COL2A1,LUM,KNG1,PRKACA,GSK3A,MAPK13,YES1,PPP3CB,CDK9,CR1L,SERPING1,IREB2,CD200R1,NUDT1,INPP4A,LEPREL1,NAT1,RABGGTA,STMN2,FBXL20,HOMER3	1.92247e-06	5
Neighbors of Acquired angioedema	Pathway	2	2	66	Acquired angioedema	KNG1,SERPING1	1.86184e-05	6
Neighbors of axon cargo transport	Pathway	337	7	2	axon cargo transport	HTT,DNM1,CLIP1,KIF1C,KIF1B,NEFL,KNG1	2.31351e-05	7
Neighbors of Charcot-Marie-Tooth Disease	Pathway	65	4	6	Charcot-Marie-Tooth Disease	DNM1,DNM2,KIF1B,NEFL	2.352e-05	8
Neighbors of RNA splicing	Pathway	1543	14	0	RNA splicing	UGT1A1,SDHD,CD59,HTT,TPM1,TPM2,KHDRBS3,CELF2,COL2A1,GGT1,GSK3A,CDK9,SERPING1,RABGGTA	2.75288e-05	9
Neighbors of heart function	Pathway	1155	12	1	heart function	DGAT1,CD59,SDC4,DNM2,HDAC3,TPM1,TPM2,KNG1,GSK3A,PPP3CB,CDK9,SERPING1	3.01934e-05	10
Neighbors of Atrophy	Pathway	634	9	1	Atrophy	DGAT1,HTT,DNM2,KIF1B,NEFL,KNG1,IREB2,GSTM3,GRID2	3.06891e-05	11
Neighbors of cell death	Pathway	4895	27	0	cell death	MAT1A,DGAT1,CD59,SDC4,HTT,DNM1,DNM2,CLIP1,HDAC3,TPM1,TPM2,KIF1C,KIF1B,COL2A1,KNG1,GSK3A,TOLLIP,MAPK13,CAMK2A,PPP3CB,RGS10,CDK9,IREB2,CD200R1,NUDT1,INPP4A,GRID2	3.50159e-05	12
Neighbors of life span	Pathway	1415	13	0	life span	MAT1A,SDC4,HTT,DNM1,DNM2,HDAC3,NEFL,KNG1,GSK3A,CDK9,INPP4A,GSTM3,FBXL20	4.86503e-05	13
Neighbors of high myopia	Pathway	30	3	9	high myopia	COL2A1,LUM,LEPREL1	6.49778e-05	14
Neighbors of internalization	Pathway	1936	15	0	internalization	UGT1A1,CD59,COLEC12,SDC4,HTT,DNM1,DNM2,CLIP1,TPM2,KHDRBS3,KNG1,TOLLIP,TAOK2,RGS10,PIP4K2B	8.37266e-05	15
Neighbors of Hereditary Angioedema Type III	Pathway	5	2	33	Hereditary Angioedema Type III	KNG1,SERPING1	9.26376e-05	16
Neighbors of neuron toxicity	Pathway	1108	11	0	neuron toxicity	UGT1A1,CD59,HTT,HDAC3,NEFL,KNG1,GSK3A,RGS10,IREB2,CD200R1,NUDT1	9.99968e-05	17
Neighbors of complement activation, alternative pathway	Pathway	95	4	4	complement activation, alternative pathway	CD59,COL2A1,CR1L,SERPING1	0.0001024	18
Neighbors of Abnormalities	Pathway	2458	17	0	Abnormalities	UGT1A1,SDHD,HTT,DNM2,HDAC3,TPM1,TPM2,COL2A1,LUM,NEFL,GGT1,KNG1,CAMK2A,SERPING1,IREB2,CD200R1,GRID2	0.000106509	19
Neighbors of Neoplasms	Pathway	5248	27	0	Neoplasms	MAT1A,NUDT2,SDHD,CD59,DNM1,DNM2,CLIP1,HDAC3,NOLC1,TPM1,TPM2,KIF1B,LUM,NEFL,KNG1,PRKACA,MAPK13,YES1,CDK9,CR1L,IREB2,CD200R1,NUDT1,PIP4K2B,INPP4A,GSTM3,NAT1	0.00011965	20
Neighbors of Death	Pathway	3018	19	0	Death	DGAT1,CD59,HTT,HDAC3,TPM1,TPM2,COL2A1,NEFL,KNG1,GSK3A,TOLLIP,PPP3CB,RGS10,CDK9,CR1L,IREB2,NUDT1,PIP4K2B,GRID2	0.000134757	21
Neighbors of membrane tubulation	Pathway	105	4	3	membrane tubulation	HTT,DNM1,DNM2,FAM21C	0.00015025	22
Neighbors of cytokinesis	Pathway	792	9	1	cytokinesis	SDC4,HTT,DNM1,DNM2,TPM1,TPM2,CDK9,ANK3,MITD1	0.000166815	23
Neighbors of post Golgi transport	Pathway	43	3	6	post Golgi transport	HTT,DNM1,DNM2	0.000187005	24
Neighbors of Injuries	Pathway	2341	16	0	Injuries	MAT1A,UGT1A1,CD59,SDC4,HTT,COL2A1,LUM,NEFL,KNG1,CAMK2A,CR1L,SERPING1,IREB2,CD200R1,GRID2,STMN2	0.000202024	25
Neighbors of mitochondrion fusion	Pathway	116	4	3	mitochondrion fusion	HTT,DNM1,KIF1B,NEFL	0.000219599	26
Neighbors of upper respiratory tract obstruction	Pathway	8	2	22	upper respiratory tract obstruction	KNG1,SERPING1	0.000221245	27
Neighbors of Breast Cancer	Pathway	1887	14	0	Breast Cancer	UGT1A1,CD59,SDC4,CLIP1,KHDRBS3,LUM,KNG1,YES1,CD200R1,PIP4K2B,INPP4A,GSTM3,LEPREL1,NAT1	0.000233983	28
Neighbors of Ataxia	Pathway	219	5	2	Ataxia	HTT,IREB2,CHD6,GRID2,ANK3	0.000235881	29
Neighbors of dopamine receptor	Pathway	127	4	3	dopamine receptor	HTT,CLIP1,KNG1,CAMK2A	0.000309471	30
Neighbors of actin organization	Pathway	1720	13	0	actin organization	RAB13,SDC4,HTT,DNM1,DNM2,CLIP1,TPM2,KHDRBS3,LUM,KNG1,TAOK2,CR1L,MICALL2	0.000336589	31
Neighbors of microtubule sliding	Pathway	130	4	3	microtubule sliding	HTT,DNM1,CLIP1,KIF1B	0.000337964	32
Neighbors of protein ubiquitination	Pathway	1960	14	0	protein ubiquitination	MAT1A,SDC4,HTT,DNM1,CLIP1,TPM2,NEFL,KNG1,GSK3A,TOLLIP,YES1,CDK9,IREB2,FBXL20	0.000344456	33
Neighbors of Leukocyte-endothelial cell interaction	Pathway	131	4	3	Leukocyte-endothelial cell interaction	COLEC12,COL2A1,KNG1,SERPING1	0.000347865	34
Neighbors of synaptic vesicle transport	Pathway	132	4	3	synaptic vesicle transport	HTT,DNM1,DNM2,KIF1B	0.000357973	35
Neighbors of mitosis	Pathway	2233	15	0	mitosis	UGT1A1,SDC4,HTT,DNM1,DNM2,CLIP1,HDAC3,NDC1,CELF2,PRKACA,TAOK2,YES1,CDK9,CHD6,ANK3	0.000396429	36
Neighbors of neurite outgrowth	Pathway	1752	13	0	neurite outgrowth	RAB13,SDC4,HTT,DNM1,LUM,NEFL,KNG1,PRKACA,GSK3A,CAMK2A,YES1,STMN2,MICALL2	0.000401375	37
Neighbors of GTPase activity	Pathway	56	3	5	GTPase activity	DNM1,KNG1,RGS10	0.00040357	38
Neighbors of Nerve Degeneration	Pathway	1309	11	0	Nerve Degeneration	CD59,HTT,DNM1,DNM2,HDAC3,NEFL,CAMK2A,SERPING1,CD200R1,NUDT1,GRID2	0.000419941	39
Neighbors of heart performance	Pathway	251	5	1	heart performance	HTT,TPM1,TPM2,KNG1,SERPING1	0.000439597	40
Neighbors of cell spreading	Pathway	904	9	0	cell spreading	SDC4,DNM1,DNM2,TPM1,TPM2,COL2A1,LUM,KNG1,PIP4K2B	0.000439641	41
Neighbors of cell migration	Pathway	3873	21	0	cell migration	RAB13,MAT1A,GALNT7,DGAT1,SDC4,HTT,DNM1,TUBB2B,DNM2,CLIP1,HDAC3,TPM1,KIF1C,COL2A1,LUM,KNG1,PRKACA,GSK3A,MAPK13,YES1,SERPING1	0.000443194	42
Neighbors of Infection	Pathway	2524	16	0	Infection	CD59,SDC4,HTT,DNM1,DNM2,HDAC3,TPM2,COL2A1,LUM,KNG1,CAMK2A,YES1,SERPING1,MX2,CD200R1,STMN2	0.000469551	43
Neighbors of Centronuclear Myopathy	Pathway	12	2	15	Centronuclear Myopathy	DNM1,DNM2	0.00047625	44
Neighbors of classical-complement-pathway C3/C5 convertase	Pathway	60	3	4	classical-complement-pathway C3/C5 convertase	CD59,CR1L,SERPING1	0.000492827	45
Neighbors of membrane fission	Pathway	62	3	4	membrane fission	DNM1,DNM2,MAPK13	0.000541823	46
Neighbors of Myopathies, Nemaline	Pathway	13	2	14	Myopathies, Nemaline	TPM1,TPM2	0.00055472	47
Neighbors of Huntington disease like syndrome	Pathway	13	2	14	Huntington disease like syndrome	HTT,HDAC3	0.00055472	48
Neighbors of myosin heavy chain	Pathway	150	4	2	myosin heavy chain	TPM1,TPM2,MYH4,KNG1	0.000577989	49
Neighbors of HMSN Type II	Pathway	14	2	13	HMSN Type II	KIF1B,NEFL	0.00063902	50
Neighbors of water retention	Pathway	67	3	4	water retention	COL2A1,LUM,KNG1	0.000677657	51
Neighbors of oxidative stress	Pathway	2356	15	0	oxidative stress	MAT1A,UGT1A1,CD59,COLEC12,HTT,KIF1B,GGT1,KNG1,GSK3A,PPP3CB,CR1L,IREB2,NUDT1,INPP4A,GSTM3	0.000694268	52
Neighbors of complement activation, classical pathway	Pathway	160	4	2	complement activation, classical pathway	CD59,COL2A1,CR1L,SERPING1	0.000734827	53
Neighbors of macrophage activation	Pathway	613	7	1	macrophage activation	DGAT1,CD59,HDAC3,KHDRBS3,KNG1,RGS10,CD200R1	0.000894836	54
Neighbors of skin swelling	Pathway	17	2	11	skin swelling	KNG1,SERPING1	0.000926607	55
Neighbors of nerve cell differentiation	Pathway	1457	11	0	nerve cell differentiation	CD59,HTT,DNM1,HDAC3,KHDRBS3,CELF2,NEFL,KNG1,TAOK2,CAMK2A,STMN2	0.00101566	56
Neighbors of joint function	Pathway	18	2	10	joint function	COL2A1,KNG1	0.00103394	57
Neighbors of PKC	Pathway	1023	9	0	PKC	GALNT7,DGAT1,CD59,SDC4,HTT,COL2A1,PRKACA,CAMK2A,ANK3	0.00105655	58
Neighbors of Kidney Failure	Pathway	308	5	1	Kidney Failure	UGT1A1,DNM1,DNM2,KNG1,CR1L	0.00109882	59
Neighbors of Neurodegenerative Diseases	Pathway	828	8	0	Neurodegenerative Diseases	HTT,DNM2,HDAC3,CELF2,NEFL,MAPK13,IREB2,CD200R1	0.00112455	60
Neighbors of RPTP	Pathway	19	2	10	RPTP	KNG1,CAMK2A	0.00114695	61
Neighbors of cell growth	Pathway	5082	24	0	cell growth	MAT1A,UGT1A1,SDHD,CD59,SDC4,HTT,BYSL,DNM1,DNM2,CLIP1,HDAC3,NOLC1,TPM1,KIF1B,KHDRBS3,LUM,KNG1,PRKACA,GSK3A,PIK3R4,YES1,CDK9,INPP4A,NAT1	0.00117503	62
Neighbors of pinocytosis	Pathway	315	5	1	pinocytosis	SDC4,DNM1,DNM2,KNG1,FAM21C	0.00121333	63
Neighbors of Encephalomyelitis, Autoimmune, Experimental	Pathway	472	6	1	Encephalomyelitis, Autoimmune, Experimental	CD59,COL2A1,NEFL,KNG1,CR1L,CD200R1	0.00122886	64
Neighbors of centrosome organization	Pathway	20	2	9	centrosome organization	DNM1,DNM2	0.00126562	65
Neighbors of blood coagulation, intrinsic pathway	Pathway	20	2	9	blood coagulation, intrinsic pathway	KNG1,SERPING1	0.00126562	66
Neighbors of Cardiomyopathy, Hypertrophic	Pathway	186	4	2	Cardiomyopathy, Hypertrophic	HDAC3,TPM1,TPM2,CDK9	0.00127992	67
Neighbors of Inflammation	Pathway	3060	17	0	Inflammation	DGAT1,CD59,SDC4,HTT,HDAC3,COL2A1,LUM,GGT1,KNG1,TOLLIP,MAPK13,CAMK2A,CDK9,CR1L,SERPING1,CD200R1,INPP4A	0.00134922	68
Neighbors of complement protein	Pathway	21	2	9	complement protein	CD59,SERPING1	0.00138992	69
Neighbors of complement activation	Pathway	331	5	1	complement activation	CD59,COL2A1,KNG1,CR1L,SERPING1	0.00150805	70
Neighbors of Serum Sickness	Pathway	22	2	8	Serum Sickness	CD59,HDAC3	0.00151982	71
Neighbors of Melanoma	Pathway	1084	9	0	Melanoma	GALNT7,COL2A1,LUM,GSK3A,MAPK13,YES1,CDK9,SERPING1,CD200R1	0.00157607	72
Neighbors of Angioedemas, Hereditary	Pathway	23	2	8	Angioedemas, Hereditary	KNG1,SERPING1	0.00165529	73
Neighbors of fibrillation	Pathway	93	3	3	fibrillation	HTT,COL2A1,KNG1	0.00172968	74
Neighbors of liver lesions	Pathway	894	8	0	liver lesions	CD59,SDC4,COL2A1,LUM,KNG1,MAPK13,SERPING1,GSTM3	0.00182268	75
Neighbors of Cardiac Hypertrophy	Pathway	896	8	0	Cardiac Hypertrophy	SDC4,HDAC3,TPM1,KNG1,GSK3A,TOLLIP,PPP3CB,CDK9	0.00184822	76
Neighbors of establishment of cell polarity	Pathway	514	6	1	establishment of cell polarity	SDC4,DNM1,DNM2,CLIP1,STRN,KNG1	0.0018894	77
Neighbors of Paroxysmal Nocturnal Hemoglobinuria	Pathway	25	2	7	Paroxysmal Nocturnal Hemoglobinuria	CD59,SERPING1	0.00194284	78
Neighbors of clathrin-mediated endocytosis	Pathway	352	5	1	clathrin-mediated endocytosis	SDC4,HTT,DNM1,DNM2,ANK3	0.00197103	79
Neighbors of protein sumoylation	Pathway	352	5	1	protein sumoylation	MAT1A,HTT,DNM1,HDAC3,TOLLIP	0.00197103	80
Neighbors of Myopia	Pathway	99	3	3	Myopia	COL2A1,LUM,LEPREL1	0.00206418	81
Neighbors of nucleolus organization and biogenesis	Pathway	26	2	7	nucleolus organization and biogenesis	BYSL,NOLC1	0.00209486	82
Neighbors of cell adhesion	Pathway	2374	14	0	cell adhesion	DGAT1,SDC4,HTT,BYSL,DNM2,HDAC3,COL2A1,LUM,KNG1,YES1,CR1L,SERPING1,ANK3,MICALL2	0.00220798	83
Neighbors of gap junction assembly	Pathway	102	3	2	gap junction assembly	DNM1,TUBB2B,DNM2	0.00224547	84
Neighbors of Alzheimer Disease	Pathway	1143	9	0	Alzheimer Disease	CD59,HTT,DNM1,HDAC3,KNG1,GSK3A,CAMK2A,GSTM3,STMN2	0.00225787	85
Neighbors of cell differentiation	Pathway	6987	29	0	cell differentiation	ENO3,MAT1A,DGAT1,SDC4,HTT,BYSL,DNM1,HDAC3,STRN,TPM1,KIF1C,COL2A1,LUM,KNG1,PRKACA,GSK3A,TAOK2,MAPK13,YES1,CDK9,LARP7,IREB2,CD200R1,GSTM3,NAT1,GRID2,ANK3,STMN2,HOMER3	0.00240631	86
Neighbors of Machado-Joseph Disease	Pathway	28	2	6	Machado-Joseph Disease	HTT,KNG1	0.00241525	87
Neighbors of Ehlers-Danlos Syndrome	Pathway	29	2	6	Ehlers-Danlos Syndrome	COL2A1,LUM	0.00258357	88
Neighbors of microtubule cytoskeleton organization	Pathway	549	6	1	microtubule cytoskeleton organization	HTT,DNM1,DNM2,CLIP1,TAOK2,STMN2	0.00262127	89
Neighbors of Respiratory chain	Pathway	951	8	0	Respiratory chain	MAT1A,UGT1A1,SDHD,DGAT1,HTT,DNM2,HDAC3,KNG1	0.00266935	90
Neighbors of hyperacute graft rejection	Pathway	30	2	6	hyperacute graft rejection	CD59,SERPING1	0.00275726	91
Neighbors of receptor protein-tyrosine kinase	Pathway	382	5	1	receptor protein-tyrosine kinase	DNM1,DNM2,KNG1,GSK3A,YES1	0.00280247	92
Neighbors of sperm motility	Pathway	382	5	1	sperm motility	ATP1A4,CD59,KNG1,PRKACA,GSK3A	0.00280247	93
Neighbors of Nephritis	Pathway	234	4	1	Nephritis	CD59,KNG1,CR1L,RABGGTA	0.00293529	94
Neighbors of AChR	Pathway	238	4	1	AChR	CD59,DNM1,TPM2,CR1L	0.00311809	95
Neighbors of gastrulation	Pathway	569	6	1	gastrulation	SDC4,HTT,DNM1,CELF2,YES1,NAT1	0.00312534	96
Neighbors of motor deficits	Pathway	393	5	1	motor deficits	HTT,DNM2,CELF2,NEFL,GRID2	0.003163	97
Neighbors of mitotic spindle positioning	Pathway	239	4	1	mitotic spindle positioning	HTT,DNM1,CLIP1,TAOK2	0.00316497	98
Neighbors of mitochondrial transport	Pathway	117	3	2	mitochondrial transport	HTT,KIF1B,NEFL	0.00329905	99
Neighbors of syncytium formation	Pathway	117	3	2	syncytium formation	DNM1,DNM2,MX2	0.00329905	100
