# Supplementary material for: The Brain Origin of Neonatal Microglia Determines the Content of Exosomes and Biological Function
Source: Preprints.org preprint supplement (doi:10.20944/preprints201907.0102.v1), 2019-07-08
Supplement: Supplementary file 12 [file Supplementary data 4.docx]

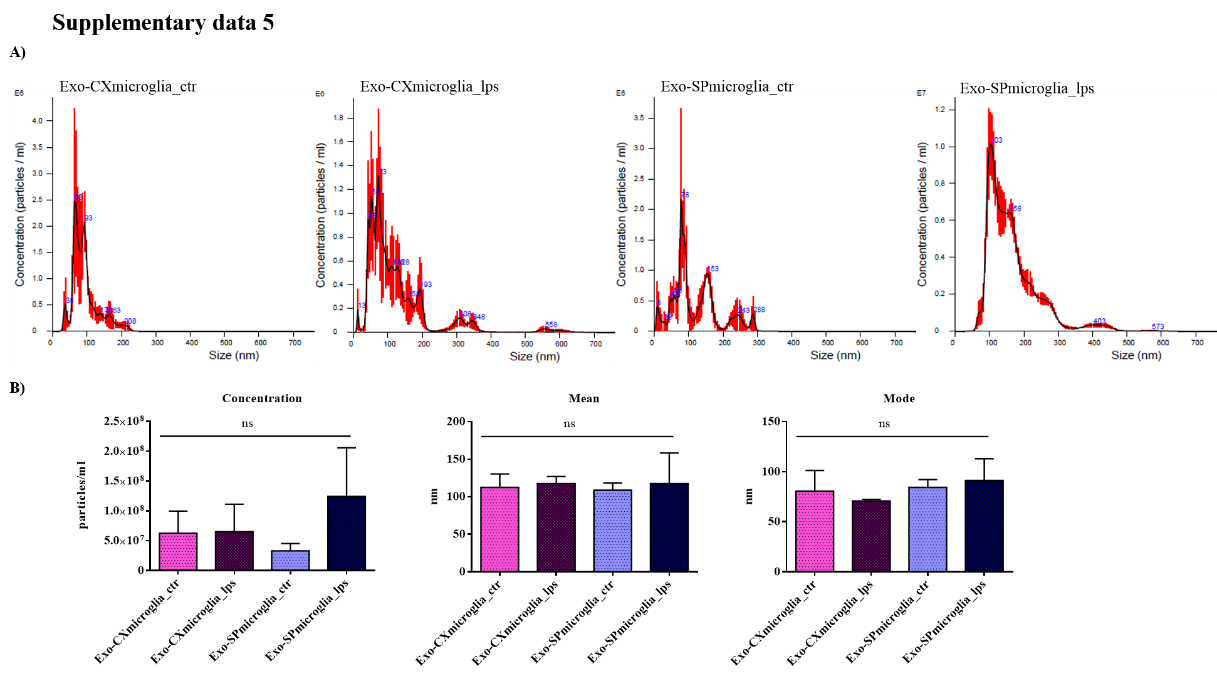


**Supplementary data 4.** (A) NanoSight analyses for exosomes of cortex and spinal cord microglia control and treated with 500ng/ml LPS. (B) Statistical analyses of NanoSight results of concentration, mean and mode analyses.
