# Supplementary material for: The Brain Origin of Neonatal Microglia Determines the Content of Exosomes and Biological Function
Source: Preprints.org preprint supplement (doi:10.20944/preprints201907.0102.v1), 2019-07-08
Supplement: Supplementary file 13 [file Supplementary data 5.xlsx]

## Sheet: Proteins
Checked	Protein FDR Confidence	Master	Accession	Description	Exp. q-value	Sum PEP Score	Coverage	# Peptides	# PSMs	# Unique Peptides	# Protein Groups	# AAs	MW [kDa]	calc. pI	Found in Sample: [S1] F1: Sample	Score Sequest HT	# Peptides Sequest HT
FALSE		Master Protein	P48500	Triosephosphate isomerase OS=Rattus norvegicus GN=Tpi1 PE=1 SV=2		54.1618	69.0763	12	17	12	1	249	26.832	7.24	High	58.7491	12
FALSE		Master Protein	P60711	Actin, cytoplasmic 1 OS=Rattus norvegicus GN=Actb PE=1 SV=1		98.714	64.2667	18	39	8	1	375	41.71	5.48	High	121.87	18
FALSE		Master Protein	P04642	L-lactate dehydrogenase A chain OS=Rattus norvegicus GN=Ldha PE=1 SV=1		59.9293	62.0482	20	27	18	1	332	36.427	8.27	High	76.1668	20
FALSE		Master Protein	P02793	Ferritin light chain 1 OS=Rattus norvegicus GN=Ftl1 PE=1 SV=3		32.7045	61.7486	8	12	8	1	183	20.736	6.43	High	29.0827	8
FALSE		Master Protein	P40307	Proteasome subunit beta type-2 OS=Rattus norvegicus GN=Psmb2 PE=1 SV=1		29.1848	60.6965	11	14	11	1	201	22.898	7.44	High	35.8489	11
FALSE		Master Protein	P04764	Alpha-enolase OS=Rattus norvegicus GN=Eno1 PE=1 SV=4		68.2577	56.2212	19	23	14	1	434	47.098	6.57	High	72.3445	19
FALSE		Master Protein	P85973	Purine nucleoside phosphorylase OS=Rattus norvegicus GN=Pnp PE=1 SV=1		47.9789	54.6713	11	17	11	1	289	32.281	6.93	High	58.2426	11
FALSE		Master Protein	P34064	Proteasome subunit alpha type-5 OS=Rattus norvegicus GN=Psma5 PE=1 SV=1		30.82	54.3568	8	9	8	1	241	26.374	4.86	High	34.275	8
FALSE		Master Protein	P21670	Proteasome subunit alpha type-4 OS=Rattus norvegicus GN=Psma4 PE=1 SV=1		31.6786	53.2567	10	12	10	1	261	29.479	7.72	High	36.6546	10
FALSE		Master Protein	Q63716	Peroxiredoxin-1 OS=Rattus norvegicus GN=Prdx1 PE=1 SV=1		18.6207	51.2563	9	11	9	1	199	22.095	8.13	High	29.1229	9
FALSE		Master Protein	P05065	Fructose-bisphosphate aldolase A OS=Rattus norvegicus GN=Aldoa PE=1 SV=2		41.9253	51.0989	12	17	10	1	364	39.327	8.09	High	53.8298	12
FALSE		Master Protein	P45592	Cofilin-1 OS=Rattus norvegicus GN=Cfl1 PE=1 SV=3		16.6621	50.6024	5	5	5	1	166	18.521	8.09	High	19.8769	5
FALSE		Master Protein	P62804	Histone H4 OS=Rattus norvegicus GN=Hist1h4b PE=1 SV=2		12.4825	50.4854	5	6	5	1	103	11.36	11.36	High	15.7014	5
FALSE		Master Protein	P18420	Proteasome subunit alpha type-1 OS=Rattus norvegicus GN=Psma1 PE=1 SV=2		36.8682	49.8099	10	15	10	1	263	29.499	6.61	High	45.4667	10
FALSE		Master Protein	P60901	Proteasome subunit alpha type-6 OS=Rattus norvegicus GN=Psma6 PE=1 SV=1		41.8373	48.374	12	16	12	1	246	27.382	6.76	High	49.6818	12
FALSE		Master Protein	P50399	Rab GDP dissociation inhibitor beta OS=Rattus norvegicus GN=Gdi2 PE=1 SV=2		34.0991	45.8427	14	15	10	1	445	50.505	6.25	High	37.8317	14
FALSE		Master Protein	P62963	Profilin-1 OS=Rattus norvegicus GN=Pfn1 PE=1 SV=2		18.7207	45.7143	5	8	5	1	140	14.948	8.28	High	20.3316	5
FALSE		Master Protein	P62329	Thymosin beta-4 OS=Rattus norvegicus GN=Tmsb4x PE=1 SV=2		6.99927	45.4545	3	4	3	1	44	5.05	5.06	High	9.56493	3
FALSE		Master Protein	P00787	Cathepsin B OS=Rattus norvegicus GN=Ctsb PE=1 SV=2		70.9824	44.5428	13	22	13	1	339	37.446	5.6	High	71.5246	13
FALSE		Master Protein	P11980	Pyruvate kinase PKM OS=Rattus norvegicus GN=Pkm PE=1 SV=3		48.6126	42.1846	16	20	16	1	531	57.781	7.06	High	61.2227	16
FALSE		Master Protein	P04797	Glyceraldehyde-3-phosphate dehydrogenase OS=Rattus norvegicus GN=Gapdh PE=1 SV=3		31.8969	42.042	9	13	9	1	333	35.805	8.03	High	34.1875	9
FALSE		Master Protein	P62260	14-3-3 protein epsilon OS=Rattus norvegicus GN=Ywhae PE=1 SV=1		29.4869	41.5686	9	12	8	1	255	29.155	4.74	High	35.2689	9
FALSE		Master Protein	P69897	Tubulin beta-5 chain OS=Rattus norvegicus GN=Tubb5 PE=1 SV=1		33.7079	41.2162	13	16	3	1	444	49.639	4.89	High	47.9628	13
FALSE		Master Protein	P17220	Proteasome subunit alpha type-2 OS=Rattus norvegicus GN=Psma2 PE=1 SV=3		33.4448	41.0256	6	10	6	1	234	25.91	7.43	High	32.4445	6
FALSE		Master Protein	B0BNA5	Coactosin-like protein OS=Rattus norvegicus GN=Cotl1 PE=1 SV=1		15.9295	40.1408	7	8	7	1	142	15.922	5.4	High	18.3753	7
FALSE		Master Protein	P18421	Proteasome subunit beta type-1 OS=Rattus norvegicus GN=Psmb1 PE=1 SV=3		27.0376	40	9	11	9	1	240	26.462	7.36	High	29.7336	9
FALSE		Master Protein	Q6AYC4	Macrophage-capping protein OS=Rattus norvegicus GN=Capg PE=1 SV=1		22.6264	39.5415	9	10	9	1	349	38.775	6.55	High	27.3874	9
FALSE		Master Protein	Q6AYZ1	Tubulin alpha-1C chain OS=Rattus norvegicus GN=Tuba1c PE=1 SV=1		41.4379	39.1982	12	13	5	1	449	49.905	5.1	High	41.8591	12
FALSE		Master Protein	P48004	Proteasome subunit alpha type-7 OS=Rattus norvegicus GN=Psma7 PE=1 SV=1		23.9738	38.9764	8	10	8	1	254	28.309	8.68	High	27.9959	8
FALSE		Master Protein	Q6P6V0	Glucose-6-phosphate isomerase OS=Rattus norvegicus GN=Gpi PE=1 SV=1		47.7286	38.7097	15	17	15	1	558	62.787	7.77	High	54.0474	15
FALSE		Master Protein	P02650	Apolipoprotein E OS=Rattus norvegicus GN=Apoe PE=1 SV=2		58.3003	38.4615	14	27	14	1	312	35.731	5.27	High	75.7761	14
FALSE		Master Protein	P63102	14-3-3 protein zeta/delta OS=Rattus norvegicus GN=Ywhaz PE=1 SV=1		27.8717	38.3673	7	11	5	1	245	27.754	4.79	High	28.9172	7
FALSE		Master Protein	P00697	Lysozyme C-1 OS=Rattus norvegicus GN=Lyz1 PE=1 SV=2		11.8722	37.8378	4	4	4	1	148	16.718	9.1	High	13.7918	4
FALSE		Master Protein	Q68FS4	Cytosol aminopeptidase OS=Rattus norvegicus GN=Lap3 PE=1 SV=1		40.1435	37.5723	15	16	15	1	519	56.115	7.21	High	46.6753	15
FALSE		Master Protein	P70623	Fatty acid-binding protein, adipocyte OS=Rattus norvegicus GN=Fabp4 PE=1 SV=3		7.50225	37.1212	4	4	4	1	132	14.699	7.94	High	11.351	4
FALSE		Master Protein	P19132	Ferritin heavy chain OS=Rattus norvegicus GN=Fth1 PE=1 SV=3		24.0824	36.8132	7	10	7	1	182	21.113	6.3	High	21.5345	7
FALSE		Master Protein	P25113	Phosphoglycerate mutase 1 OS=Rattus norvegicus GN=Pgam1 PE=1 SV=4		17.6165	36.2205	6	8	6	1	254	28.814	7.18	High	17.2804	6
FALSE		Master Protein	P07154	Cathepsin L1 OS=Rattus norvegicus GN=Ctsl PE=1 SV=2		22.1861	35.3293	9	10	9	1	334	37.636	6.83	High	27.9154	9
FALSE		Master Protein	P04937	Fibronectin OS=Rattus norvegicus GN=Fn1 PE=1 SV=2		178.492	35.2846	56	68	56	1	2477	272.341	5.76	High	200.658	56
FALSE		Master Protein	P16617	Phosphoglycerate kinase 1 OS=Rattus norvegicus GN=Pgk1 PE=1 SV=2		31.6116	35.2518	10	12	10	1	417	44.51	7.9	High	40.5162	10
FALSE		Master Protein	P11232	Thioredoxin OS=Rattus norvegicus GN=Txn PE=1 SV=2		7.96037	35.2381	3	3	3	1	105	11.666	4.92	High	8.77389	3
FALSE		Master Protein	Q5XIF6	Tubulin alpha-4A chain OS=Rattus norvegicus GN=Tuba4a PE=1 SV=1		34.3008	35.0446	11	11	4	1	448	49.892	5.06	High	34.6556	11
FALSE		Master Protein	P19804	Nucleoside diphosphate kinase B OS=Rattus norvegicus GN=Nme2 PE=1 SV=1		14.856	34.8684	4	6	4	1	152	17.272	7.44	High	17.3166	4
FALSE		Master Protein	Q5XI73	Rho GDP-dissociation inhibitor 1 OS=Rattus norvegicus GN=Arhgdia PE=1 SV=1		16.3632	34.8039	4	5	4	1	204	23.393	5.2	High	18.3103	4
FALSE		Master Protein	Q6P9T8	Tubulin beta-4B chain OS=Rattus norvegicus GN=Tubb4b PE=1 SV=1		28.5177	34.382	11	13	1	1	445	49.769	4.89	High	39.0032	11
FALSE		Master Protein	P34058	Heat shock protein HSP 90-beta OS=Rattus norvegicus GN=Hsp90ab1 PE=1 SV=4		53.3211	34.116	21	24	13	1	724	83.229	5.03	High	62.024	21
FALSE		Master Protein	P31000	Vimentin OS=Rattus norvegicus GN=Vim PE=1 SV=2		30.1783	33.9056	14	14	14	1	466	53.7	5.12	High	33.9225	14
FALSE		Master Protein	P28075	Proteasome subunit beta type-5 OS=Rattus norvegicus GN=Psmb5 PE=1 SV=3		28.1961	33.8403	8	11	8	1	263	28.567	7.02	High	35.7578	8
FALSE		Master Protein	P08721	Osteopontin OS=Rattus norvegicus GN=Spp1 PE=1 SV=2		32.097	33.123	7	9	7	1	317	34.942	4.53	High	30.6771	7
FALSE		Master Protein	P24268	Cathepsin D OS=Rattus norvegicus GN=Ctsd PE=1 SV=1		30.4085	32.9238	11	14	11	1	407	44.652	7.09	High	35.5699	11
FALSE		Master Protein	Q9R063	Peroxiredoxin-5, mitochondrial OS=Rattus norvegicus GN=Prdx5 PE=1 SV=1		19.6619	32.8638	7	7	7	1	213	22.165	8.66	High	23.8184	7
FALSE		Master Protein	Q9JHW0	Proteasome subunit beta type-7 OS=Rattus norvegicus GN=Psmb7 PE=1 SV=1		17.0482	32.491	7	9	7	1	277	29.908	7.97	High	22.833	7
FALSE		Master Protein	P42123	L-lactate dehydrogenase B chain OS=Rattus norvegicus GN=Ldhb PE=1 SV=2		20.4297	32.3353	10	11	8	1	334	36.589	6.05	High	22.9231	10
FALSE		Master Protein	P10960	Prosaposin OS=Rattus norvegicus GN=Psap PE=1 SV=1		43.0737	32.13	17	20	17	1	554	61.084	5.25	High	51.9853	17
FALSE		Master Protein	Q6IFV1	Keratin, type I cytoskeletal 14 OS=Rattus norvegicus GN=Krt14 PE=2 SV=1		62.8973	31.7526	16	29	7	1	485	52.651	5.16	High	81.1057	16
FALSE		Master Protein	P10111	Peptidyl-prolyl cis-trans isomerase A OS=Rattus norvegicus GN=Ppia PE=1 SV=2		8.73636	31.7073	4	4	4	1	164	17.863	8.16	High	9.52427	4
FALSE		Master Protein	P34067	Proteasome subunit beta type-4 OS=Rattus norvegicus GN=Psmb4 PE=1 SV=2		16.5121	31.1787	6	7	6	1	263	29.178	6.92	High	18.5833	6
FALSE		Master Protein	P07151	Beta-2-microglobulin OS=Rattus norvegicus GN=B2m PE=1 SV=1		6.85128	31.0924	3	3	3	1	119	13.711	8	High	7.81834	3
FALSE		Master Protein	P50137	Transketolase OS=Rattus norvegicus GN=Tkt PE=1 SV=1		35.3874	30.8186	14	16	14	1	623	67.601	7.49	High	42.608	14
FALSE		Master Protein	Q6P0K8	Junction plakoglobin OS=Rattus norvegicus GN=Jup PE=1 SV=1		56.0022	30.604	18	22	18	1	745	81.749	6.14	High	65.9847	18
FALSE		Master Protein	P18422	Proteasome subunit alpha type-3 OS=Rattus norvegicus GN=Psma3 PE=1 SV=3		30.319	30.1961	9	16	9	1	255	28.401	5.44	High	34.0201	9
FALSE		Master Protein	P63018	Heat shock cognate 71 kDa protein OS=Rattus norvegicus GN=Hspa8 PE=1 SV=1		49.9515	30.1858	16	20	14	1	646	70.827	5.52	High	61.7724	16
FALSE		Master Protein	P51635	Alcohol dehydrogenase [NADP(+)] OS=Rattus norvegicus GN=Akr1a1 PE=1 SV=2		19.4627	30.1538	8	9	8	1	325	36.483	7.31	High	26.1396	8
FALSE		Master Protein	P68035	Actin, alpha cardiac muscle 1 OS=Rattus norvegicus GN=Actc1 PE=2 SV=1		43.0267	29.9735	11	24	1	1	377	41.992	5.39	High	57.7052	11
FALSE		Master Protein	P62161	Calmodulin OS=Rattus norvegicus GN=Calm1 PE=1 SV=2		12.6779	29.5302	3	5	3	1	149	16.827	4.22	High	15.505	3
FALSE		Master Protein	Q6IFW6	Keratin, type I cytoskeletal 10 OS=Rattus norvegicus GN=Krt10 PE=3 SV=1		41.6842	28.8973	15	27	13	1	526	56.47	5.15	High	70.7224	15
FALSE		Master Protein	P40112	Proteasome subunit beta type-3 OS=Rattus norvegicus GN=Psmb3 PE=1 SV=1		18.6333	28.7805	5	7	5	1	205	22.949	6.55	High	22.3418	5
FALSE		Master Protein	P85970	Actin-related protein 2/3 complex subunit 2 OS=Rattus norvegicus GN=Arpc2 PE=1 SV=1		13.7689	28	8	8	8	1	300	34.37	7.36	High	19.2016	8
FALSE		Master Protein	P61983	14-3-3 protein gamma OS=Rattus norvegicus GN=Ywhag PE=1 SV=2		12.8144	27.9352	4	5	3	1	247	28.285	4.89	High	15.1133	4
FALSE		Master Protein	P11598	Protein disulfide-isomerase A3 OS=Rattus norvegicus GN=Pdia3 PE=1 SV=2		29.8386	27.7228	11	13	11	1	505	56.588	6.21	High	36.7549	11
FALSE		Master Protein	P16975	SPARC OS=Rattus norvegicus GN=Sparc PE=1 SV=4		16.6227	27.5748	7	8	7	1	301	34.274	4.89	High	14.139	7
FALSE		Master Protein	Q6B345	Protein S100-A11 OS=Rattus norvegicus GN=S100a11 PE=3 SV=1		6.80813	27.551	2	2	2	1	98	11.057	5.9	High	6.11879	2
FALSE		Master Protein	P02262	Histone H2A type 1 OS=Rattus norvegicus PE=1 SV=2		9.21959	26.9231	3	4	3	1	130	14.069	10.9	High	12.1665	3
FALSE		Master Protein	O35763	Moesin OS=Rattus norvegicus GN=Msn PE=1 SV=3		37.4419	26.8631	14	19	14	1	577	67.697	6.54	High	41.7757	14
FALSE		Master Protein	Q9QXQ0	Alpha-actinin-4 OS=Rattus norvegicus GN=Actn4 PE=1 SV=2		52.0923	26.5642	18	20	12	1	911	104.849	5.44	High	57.1567	18
FALSE		Master Protein	P82995	Heat shock protein HSP 90-alpha OS=Rattus norvegicus GN=Hsp90aa1 PE=1 SV=3		40.7992	26.4666	18	20	10	1	733	84.762	5.01	High	53.0398	18
FALSE		Master Protein	P18418	Calreticulin OS=Rattus norvegicus GN=Calr PE=1 SV=1		28.675	26.4423	8	12	8	1	416	47.966	4.49	High	32.0485	8
FALSE		Master Protein	Q00715	Histone H2B type 1 OS=Rattus norvegicus PE=1 SV=2		5.66805	26.4	3	3	3	1	125	13.982	10.36	High	5.61719	3
FALSE		Master Protein	P31044	Phosphatidylethanolamine-binding protein 1 OS=Rattus norvegicus GN=Pebp1 PE=1 SV=3		9.27394	26.2032	3	4	3	1	187	20.788	5.8	High	14.0909	3
FALSE		Master Protein	P11762	Galectin-1 OS=Rattus norvegicus GN=Lgals1 PE=1 SV=2		4.33466	25.9259	3	3	3	1	135	14.847	5.26	High	6.60833	3
FALSE		Master Protein	P11442	Clathrin heavy chain 1 OS=Rattus norvegicus GN=Cltc PE=1 SV=3		79.875	25.6716	31	32	31	1	1675	191.477	5.72	High	92.3117	31
FALSE		Master Protein	P31722	Complement C1q subcomponent subunit C OS=Rattus norvegicus GN=C1qc PE=1 SV=2		13.725	25.3061	5	6	5	1	245	25.67	8.32	High	17.2117	5
FALSE		Master Protein	P80067	Dipeptidyl peptidase 1 OS=Rattus norvegicus GN=Ctsc PE=1 SV=3		22.9776	24.8918	8	8	8	1	462	52.202	6.89	High	24.5143	8
FALSE		Master Protein	P61206	ADP-ribosylation factor 3 OS=Rattus norvegicus GN=Arf3 PE=2 SV=2		6.5238	24.8619	3	3	3	1	181	20.588	7.43	High	7.39257	3
FALSE		Master Protein	P07632	Superoxide dismutase [Cu-Zn] OS=Rattus norvegicus GN=Sod1 PE=1 SV=2		10.1385	24.6753	3	4	3	1	154	15.902	6.35	High	11.8634	3
FALSE		Master Protein	P04041	Glutathione peroxidase 1 OS=Rattus norvegicus GN=Gpx1 PE=1 SV=4		5.89037	24.3781	3	3	3	1	201	22.292	7.87	High	7.42035	3
FALSE		Master Protein	Q6IFU7	Keratin, type I cytoskeletal 42 OS=Rattus norvegicus GN=Krt42 PE=3 SV=1		40.5973	24.115	14	21	6	1	452	50.182	5.16	High	52.482	14
FALSE		Master Protein	P62630	Elongation factor 1-alpha 1 OS=Rattus norvegicus GN=Eef1a1 PE=2 SV=1		26.5569	24.026	9	11	9	1	462	50.082	9.01	High	31.5549	9
FALSE		Master Protein	Q6P734	Plasma protease C1 inhibitor OS=Rattus norvegicus GN=Serping1 PE=2 SV=1		24.6548	24.0079	9	10	9	1	504	55.576	5.83	High	26.8014	9
FALSE		Master Protein	Q5I0D1	Glyoxalase domain-containing protein 4 OS=Rattus norvegicus GN=Glod4 PE=1 SV=1		9.22429	23.8255	5	5	5	1	298	33.246	5.27	High	10.5836	5
FALSE		Master Protein	Q3T1K5	F-actin-capping protein subunit alpha-2 OS=Rattus norvegicus GN=Capza2 PE=1 SV=1		10.366	23.7762	5	5	5	1	286	32.947	5.85	High	10.452	5
FALSE		Master Protein	Q5I0D7	Xaa-Pro dipeptidase OS=Rattus norvegicus GN=Pepd PE=2 SV=1		31.384	23.5772	10	11	10	1	492	54.715	5.95	High	31.2925	10
FALSE		Master Protein	P38983	40S ribosomal protein SA OS=Rattus norvegicus GN=Rpsa PE=1 SV=3		10.3759	23.3898	4	4	4	1	295	32.803	4.87	High	13.6011	4
FALSE		Master Protein	P35704	Peroxiredoxin-2 OS=Rattus norvegicus GN=Prdx2 PE=1 SV=3		6.9073	23.2323	4	4	4	1	198	21.77	5.59	High	8.37702	4
FALSE		Master Protein	P04785	Protein disulfide-isomerase OS=Rattus norvegicus GN=P4hb PE=1 SV=2		23.4482	23.1827	11	13	11	1	509	56.916	4.93	High	34.5826	11
FALSE		Master Protein	P30121	Metalloproteinase inhibitor 2 OS=Rattus norvegicus GN=Timp2 PE=1 SV=3		12.9095	23.1818	4	5	4	1	220	24.34	7.49	High	18.1005	4
FALSE		Master Protein	P05197	Elongation factor 2 OS=Rattus norvegicus GN=Eef2 PE=1 SV=4		42.5359	23.0769	13	14	13	1	858	95.223	6.83	High	49.8824	13
FALSE		Master Protein	Q63610	Tropomyosin alpha-3 chain OS=Rattus norvegicus GN=Tpm3 PE=1 SV=2		15.4487	22.9839	6	7	4	1	248	28.989	4.78	High	18.9117	6
FALSE		Master Protein	P06762	Heme oxygenase 1 OS=Rattus norvegicus GN=Hmox1 PE=1 SV=1		11.0366	22.8374	5	5	5	1	289	32.985	6.54	High	11.7401	5
FALSE		Master Protein	P23785	Granulins OS=Rattus norvegicus GN=Grn PE=1 SV=3		43.1025	22.7891	10	15	10	1	588	63.325	6.47	High	42.9356	10
FALSE		Master Protein	P47853	Biglycan OS=Rattus norvegicus GN=Bgn PE=1 SV=1		16.1385	22.7642	8	8	8	1	369	41.68	7.52	High	19.7352	8
FALSE		Master Protein	P47942	Dihydropyrimidinase-related protein 2 OS=Rattus norvegicus GN=Dpysl2 PE=1 SV=1		24.6079	22.5524	9	10	9	1	572	62.239	6.38	High	30.6481	9
FALSE		Master Protein	P06302	Prothymosin alpha OS=Rattus norvegicus GN=Ptma PE=1 SV=2		21.5056	22.3214	5	7	5	1	112	12.375	3.84	High	23.2856	5
FALSE		Master Protein	Q63797	Proteasome activator complex subunit 1 OS=Rattus norvegicus GN=Psme1 PE=2 SV=1		6.99666	22.0884	4	4	4	1	249	28.559	6.02	High	9.57853	4
FALSE		Master Protein	P09495	Tropomyosin alpha-4 chain OS=Rattus norvegicus GN=Tpm4 PE=1 SV=3		15.7999	21.7742	6	7	4	1	248	28.492	4.69	High	17.8635	6
FALSE		Master Protein	Q4V7C7	Actin-related protein 3 OS=Rattus norvegicus GN=Actr3 PE=1 SV=1		14.1017	21.5311	6	6	6	1	418	47.327	5.88	High	15.2885	6
FALSE		Master Protein	P04906	Glutathione S-transferase P OS=Rattus norvegicus GN=Gstp1 PE=1 SV=2		8.01223	21.4286	3	4	3	1	210	23.424	7.36	High	13.5172	3
FALSE		Master Protein	Q6P6Q2	Keratin, type II cytoskeletal 5 OS=Rattus norvegicus GN=Krt5 PE=1 SV=1		46.7691	21.3542	17	36	9	1	576	61.788	7.8	High	82.3917	17
FALSE		Master Protein	P32038	Complement factor D OS=Rattus norvegicus GN=Cfd PE=1 SV=2		9.31335	21.2928	3	3	3	1	263	28.424	7.06	High	10.1284	3
FALSE		Master Protein	P10760	Adenosylhomocysteinase OS=Rattus norvegicus GN=Ahcy PE=1 SV=3		15.3371	20.6019	7	8	7	1	432	47.507	6.54	High	21.4789	7
FALSE		Master Protein	Q62632	Follistatin-related protein 1 OS=Rattus norvegicus GN=Fstl1 PE=1 SV=1		15.8095	20.5882	5	8	5	1	306	34.6	5.99	High	12.3906	5
FALSE		Master Protein	Q3MIE4	Synaptic vesicle membrane protein VAT-1 homolog OS=Rattus norvegicus GN=Vat1 PE=1 SV=1		20.3647	20.5446	6	7	6	1	404	43.091	6.62	High	22.6328	6
FALSE		Master Protein	P07895	Superoxide dismutase [Mn], mitochondrial OS=Rattus norvegicus GN=Sod2 PE=1 SV=2		15.2326	20.2703	5	6	5	1	222	24.659	8.81	High	13.9914	5
FALSE		Master Protein	O35509	Ras-related protein Rab-11B OS=Rattus norvegicus GN=Rab11b PE=1 SV=4		6.32034	20.1835	4	4	4	1	218	24.473	5.94	High	9.80825	4
FALSE		Master Protein	P85968	6-phosphogluconate dehydrogenase, decarboxylating OS=Rattus norvegicus GN=Pgd PE=1 SV=1		19.3027	20.0828	9	10	9	1	483	53.202	7.02	High	18.4306	9
FALSE		Master Protein	P07335	Creatine kinase B-type OS=Rattus norvegicus GN=Ckb PE=1 SV=2		17.996	19.9475	6	6	6	1	381	42.698	5.67	High	19	6
FALSE		Master Protein	P62982	Ubiquitin-40S ribosomal protein S27a OS=Rattus norvegicus GN=Rps27a PE=1 SV=2		8.83468	19.8718	3	4	3	1	156	17.939	9.64	High	10.8439	3
FALSE		Master Protein	Q5RKI0	WD repeat-containing protein 1 OS=Rattus norvegicus GN=Wdr1 PE=1 SV=3		18.7423	19.802	7	7	7	1	606	66.14	6.62	High	17.7475	7
FALSE		Master Protein	P05371	Clusterin OS=Rattus norvegicus GN=Clu PE=1 SV=2		24.2915	19.6868	7	8	7	1	447	51.342	5.71	High	26.8236	7
FALSE		Master Protein	Q6Q0N1	Cytosolic non-specific dipeptidase OS=Rattus norvegicus GN=Cndp2 PE=1 SV=1		18.704	19.3684	7	8	7	1	475	52.66	5.66	High	23.5383	7
FALSE		Master Protein	P01026	Complement C3 OS=Rattus norvegicus GN=C3 PE=1 SV=3		65.1901	19.3626	26	30	26	1	1663	186.342	6.54	High	70.6031	26
FALSE		Master Protein	P07943	Aldose reductase OS=Rattus norvegicus GN=Akr1b1 PE=1 SV=3		9.90001	19.3038	6	8	6	1	316	35.774	6.71	High	9.8254	6
FALSE		Master Protein	Q4KM35	Proteasome subunit beta type-10 OS=Rattus norvegicus GN=Psmb10 PE=2 SV=1		11.7627	19.0476	4	4	4	1	273	29.02	6.64	High	12.0744	4
FALSE		Master Protein	P15429	Beta-enolase OS=Rattus norvegicus GN=Eno3 PE=1 SV=3		25.3977	18.894	6	8	1	1	434	46.984	7.44	High	26.5526	6
FALSE		Master Protein	Q08163	Adenylyl cyclase-associated protein 1 OS=Rattus norvegicus GN=Cap1 PE=1 SV=3		19.7485	18.7764	7	10	7	1	474	51.556	7.52	High	20.9515	7
FALSE		Master Protein	P31721	Complement C1q subcomponent subunit B OS=Rattus norvegicus GN=C1qb PE=1 SV=2		14.0211	18.5771	4	5	4	1	253	26.573	9	High	15.74	4
FALSE		Master Protein	P00507	Aspartate aminotransferase, mitochondrial OS=Rattus norvegicus GN=Got2 PE=1 SV=2		12.8783	18.3721	6	6	6	1	430	47.284	9	High	17.7882	6
FALSE		Master Protein	P68255	14-3-3 protein theta OS=Rattus norvegicus GN=Ywhaq PE=1 SV=1		14.7764	18.3673	4	7	2	1	245	27.761	4.78	High	13.721	4
FALSE		Master Protein	Q63945	Protein SET OS=Rattus norvegicus GN=Set PE=2 SV=2		9.04991	18.3391	4	4	4	1	289	33.386	4.32	High	11.131	4
FALSE		Master Protein	P28064	Proteasome subunit beta type-8 OS=Rattus norvegicus GN=Psmb8 PE=1 SV=3		10.7179	18.1159	4	4	4	1	276	30.55	7.42	High	13.0189	4
FALSE		Master Protein	P68511	14-3-3 protein eta OS=Rattus norvegicus GN=Ywhah PE=1 SV=2		10.8633	17.8862	3	4	2	1	246	28.194	4.89	High	11.757	3
FALSE		Master Protein	Q63691	Monocyte differentiation antigen CD14 OS=Rattus norvegicus GN=Cd14 PE=2 SV=2		15.2689	17.7419	6	6	6	1	372	40.029	5.52	High	18.4324	6
FALSE		Master Protein	Q7M0E3	Destrin OS=Rattus norvegicus GN=Dstn PE=1 SV=3		4.4568	17.5758	2	2	2	1	165	18.522	8.03	High	5.72893	2
FALSE		Master Protein	P62898	Cytochrome c, somatic OS=Rattus norvegicus GN=Cycs PE=1 SV=2		2.88235	17.1429	2	2	2	1	105	11.598	9.58	High	2.56842	2
FALSE		Master Protein	Q9EQX9	Ubiquitin-conjugating enzyme E2 N OS=Rattus norvegicus GN=Ube2n PE=1 SV=1		3.70511	17.1053	2	2	2	1	152	17.113	6.57	High	5.19661	2
FALSE		Master Protein	O88989	Malate dehydrogenase, cytoplasmic OS=Rattus norvegicus GN=Mdh1 PE=1 SV=3		14.3195	17.0659	4	4	4	1	334	36.46	6.58	High	14.4456	4
FALSE		Master Protein	P05964	Protein S100-A6 OS=Rattus norvegicus GN=S100a6 PE=1 SV=3		2.59025	16.8539	2	2	2	1	89	10.028	5.48	High	1.94153	2
FALSE		Master Protein	P05942	Protein S100-A4 OS=Rattus norvegicus GN=S100a4 PE=2 SV=1		3.08475	16.8317	2	2	2	1	101	11.769	5.12	High	4.70804	2
FALSE		Master Protein	P30349	Leukotriene A-4 hydrolase OS=Rattus norvegicus GN=Lta4h PE=2 SV=2		19.8197	16.7213	9	9	9	1	610	69.132	6.04	High	17.5738	9
FALSE		Master Protein	Q9R1T3	Cathepsin Z OS=Rattus norvegicus GN=Ctsz PE=1 SV=2		11.2053	16.6667	5	6	5	1	306	34.172	7.15	High	14.2696	5
FALSE		Master Protein	Q4KLF8	Actin-related protein 2/3 complex subunit 5 OS=Rattus norvegicus GN=Arpc5 PE=1 SV=3		5.03424	16.5563	2	2	2	1	151	16.31	5.67	High	5.5329	2
FALSE		Master Protein	Q5XFX0	Transgelin-2 OS=Rattus norvegicus GN=Tagln2 PE=1 SV=1		5.47231	16.0804	2	2	2	1	199	22.379	8.25	High	5.80474	2
FALSE		Master Protein	Q68FP1	Gelsolin OS=Rattus norvegicus GN=Gsn PE=1 SV=1		31.7249	15.8974	10	13	10	1	780	86.014	6.09	High	32.7094	10
FALSE		Master Protein	P13941	Collagen alpha-1(III) chain OS=Rattus norvegicus GN=Col3a1 PE=2 SV=3		40.6533	15.7211	15	15	15	1	1463	138.851	6.52	High	53.1631	15
FALSE		Master Protein	P63029	Translationally-controlled tumor protein OS=Rattus norvegicus GN=Tpt1 PE=1 SV=1		5.46005	15.6977	2	3	2	1	172	19.45	4.86	High	8.24478	2
FALSE		Master Protein	P50398	Rab GDP dissociation inhibitor alpha OS=Rattus norvegicus GN=Gdi1 PE=1 SV=1		9.37082	15.66	5	5	1	1	447	50.504	5.14	High	10.9221	5
FALSE		Master Protein	P05370	Glucose-6-phosphate 1-dehydrogenase OS=Rattus norvegicus GN=G6pdx PE=1 SV=3		11.4687	15.534	8	8	8	1	515	59.338	6.38	High	14.7411	8
FALSE		Master Protein	Q62745	CD81 antigen OS=Rattus norvegicus GN=Cd81 PE=1 SV=1		9.34955	15.2542	2	3	2	1	236	25.871	5.52	High	11.2052	2
FALSE		Master Protein	Q6P502	T-complex protein 1 subunit gamma OS=Rattus norvegicus GN=Cct3 PE=1 SV=1		9.07479	15.2294	6	6	6	1	545	60.608	6.64	High	8.51775	6
FALSE		Master Protein	P50282	Matrix metalloproteinase-9 OS=Rattus norvegicus GN=Mmp9 PE=2 SV=1		22.3931	14.8305	9	10	9	1	708	78.561	6.07	High	21.4731	9
FALSE		Master Protein	O88656	Actin-related protein 2/3 complex subunit 1B OS=Rattus norvegicus GN=Arpc1b PE=1 SV=3		10.1511	14.7849	4	4	4	1	372	41.03	8.35	High	12.3706	4
FALSE		Master Protein	Q06000	Lipoprotein lipase OS=Rattus norvegicus GN=Lpl PE=1 SV=1		17.3055	14.7679	5	7	5	1	474	53.049	8.13	High	18.3947	5
FALSE		Master Protein	P04636	Malate dehydrogenase, mitochondrial OS=Rattus norvegicus GN=Mdh2 PE=1 SV=2		10.0857	14.497	4	4	4	1	338	35.661	8.68	High	11.558	4
FALSE		Master Protein	P28077	Proteasome subunit beta type-9 OS=Rattus norvegicus GN=Psmb9 PE=1 SV=2		6.10989	14.1553	2	2	2	1	219	23.31	5.01	High	7.56967	2
FALSE		Master Protein	Q9R0J8	Legumain OS=Rattus norvegicus GN=Lgmn PE=1 SV=1		15.4168	14.023	4	5	4	1	435	49.434	6.58	High	17.8822	4
FALSE		Master Protein	P09606	Glutamine synthetase OS=Rattus norvegicus GN=Glul PE=1 SV=3		13.5623	13.941	4	5	4	1	373	42.24	7.08	High	12.8478	4
FALSE		Master Protein	Q64119	Myosin light polypeptide 6 OS=Rattus norvegicus GN=Myl6 PE=1 SV=3		4.37737	13.9073	2	2	2	1	151	16.964	4.55	High	5.21561	2
FALSE		Master Protein	P09117	Fructose-bisphosphate aldolase C OS=Rattus norvegicus GN=Aldoc PE=1 SV=3		3.67033	13.7741	3	3	1	1	363	39.259	7.12	High	8.23677	3
FALSE		Master Protein	Q641Z7	Acid sphingomyelinase-like phosphodiesterase 3a OS=Rattus norvegicus GN=Smpdl3a PE=2 SV=1		10.1734	13.7079	4	4	4	1	445	49.864	6.28	High	12.3968	4
FALSE		Master Protein	P06761	78 kDa glucose-regulated protein OS=Rattus norvegicus GN=Hspa5 PE=1 SV=1		18.4796	13.4557	7	7	5	1	654	72.302	5.16	High	20.7625	7
FALSE		Master Protein	P35213	14-3-3 protein beta/alpha OS=Rattus norvegicus GN=Ywhab PE=1 SV=3		11.5827	13.4146	3	7	1	1	246	28.037	4.88	High	9.58536	3
FALSE		Master Protein	Q9JI92	Syntenin-1 OS=Rattus norvegicus GN=Sdcbp PE=1 SV=1		4.71609	13.3333	3	3	3	1	300	32.403	7.49	High	7.82718	3
FALSE		Master Protein	P02091	Hemoglobin subunit beta-1 OS=Rattus norvegicus GN=Hbb PE=1 SV=3		5.92377	12.9252	2	3	2	1	147	15.969	8.07	High	7.78354	2
FALSE		Master Protein	Q4FZU2	Keratin, type II cytoskeletal 6A OS=Rattus norvegicus GN=Krt6a PE=1 SV=1		19.3497	12.8623	7	14	3	1	552	59.213	7.94	High	31.5308	7
FALSE		Master Protein	Q68FR6	Elongation factor 1-gamma OS=Rattus norvegicus GN=Eef1g PE=2 SV=3		10.9166	12.8146	4	6	4	1	437	50.029	6.74	High	13.4213	4
FALSE		Master Protein	P07323	Gamma-enolase OS=Rattus norvegicus GN=Eno2 PE=1 SV=2		16.429	12.4424	4	5	1	1	434	47.111	5.16	High	15.8724	4
FALSE		Master Protein	P02454	Collagen alpha-1(I) chain OS=Rattus norvegicus GN=Col1a1 PE=1 SV=5		26.2538	12.3193	11	11	11	1	1453	137.869	5.92	High	35.5311	11
FALSE		Master Protein	Q62667	Major vault protein OS=Rattus norvegicus GN=Mvp PE=1 SV=4		18.4335	11.9628	8	9	8	1	861	95.739	5.58	High	24.562	8
FALSE		Master Protein	Q9WTT6	Guanine deaminase OS=Rattus norvegicus GN=Gda PE=1 SV=1		10.1172	11.8943	4	5	4	1	454	50.984	5.83	High	10.3909	4
FALSE		Master Protein	Q9EPB1	Dipeptidyl peptidase 2 OS=Rattus norvegicus GN=Dpp7 PE=1 SV=1		10.8246	11.8	4	4	4	1	500	55.079	5.05	High	11.9031	4
FALSE		Master Protein	P84245	Histone H3.3 OS=Rattus norvegicus GN=H3f3b PE=1 SV=2		2.77037	11.7647	2	2	2	1	136	15.319	11.27	High	4.06697	2
FALSE		Master Protein	P49911	Acidic leucine-rich nuclear phosphoprotein 32 family member A OS=Rattus norvegicus GN=Anp32a PE=2 SV=1		6.5595	11.7409	2	2	2	1	247	28.547	4.08	High	6.97595	2
FALSE		Master Protein	P70645	Bleomycin hydrolase OS=Rattus norvegicus GN=Blmh PE=1 SV=1		10.5263	11.674	4	4	4	1	454	52.289	6.48	High	12.2863	4
FALSE		Master Protein	P30120	Metalloproteinase inhibitor 1 OS=Rattus norvegicus GN=Timp1 PE=1 SV=2		3.61884	11.5207	2	2	2	1	217	23.778	8.09	High	4.59809	2
FALSE		Master Protein	P24368	Peptidyl-prolyl cis-trans isomerase B OS=Rattus norvegicus GN=Ppib PE=1 SV=3		4.4467	11.1111	2	2	2	1	216	23.788	9.5	High	6.20627	2
FALSE		Master Protein	P31720	Complement C1q subcomponent subunit A OS=Rattus norvegicus GN=C1qa PE=1 SV=2		4.94562	11.0204	2	2	2	1	245	25.901	8.97	High	6.55981	2
FALSE		Master Protein	Q5M7U6	Actin-related protein 2 OS=Rattus norvegicus GN=Actr2 PE=2 SV=1		9.6518	10.9137	3	4	3	1	394	44.705	6.74	High	12.1055	3
FALSE		Master Protein	Q6IG05	Keratin, type II cytoskeletal 75 OS=Rattus norvegicus GN=Krt75 PE=3 SV=2		21.1859	10.8856	8	15	1	1	542	58.991	8.07	High	31.4901	8
FALSE		Master Protein	O35244	Peroxiredoxin-6 OS=Rattus norvegicus GN=Prdx6 PE=1 SV=3		5.11721	10.7143	2	2	2	1	224	24.803	5.94	High	4.53405	2
FALSE		Master Protein	Q9EQS0	Transaldolase OS=Rattus norvegicus GN=Taldo1 PE=1 SV=2		4.59379	10.6825	4	4	4	1	337	37.436	7.03	High	6.563	4
FALSE		Master Protein	Q9Z1P2	Alpha-actinin-1 OS=Rattus norvegicus GN=Actn1 PE=1 SV=1		24.6867	10.5381	7	8	1	1	892	102.896	5.38	High	26.9384	7
FALSE		Master Protein	P35289	Ras-related protein Rab-15 OS=Rattus norvegicus GN=Rab15 PE=2 SV=1		4.49438	10.3774	2	2	2	1	212	24.268	5.52	High	5.08911	2
FALSE		Master Protein	Q6P7Q4	Lactoylglutathione lyase OS=Rattus norvegicus GN=Glo1 PE=1 SV=3		3.11499	10.3261	2	2	2	1	184	20.806	5.31	High	4.81086	2
FALSE		Master Protein	Q07936	Annexin A2 OS=Rattus norvegicus GN=Anxa2 PE=1 SV=2		8.01613	10.3245	3	3	3	1	339	38.654	7.69	High	9.99637	3
FALSE		Master Protein	P62703	40S ribosomal protein S4, X isoform OS=Rattus norvegicus GN=Rps4x PE=2 SV=2		5.01318	10.2662	3	3	3	1	263	29.579	10.15	High	6.64676	3
FALSE		Master Protein	P63245	Receptor of activated protein C kinase 1 OS=Rattus norvegicus GN=Rack1 PE=1 SV=3		5.83776	10.0946	3	3	3	1	317	35.055	7.69	High	7.8402	3
FALSE		Master Protein	P27605	Hypoxanthine-guanine phosphoribosyltransferase OS=Rattus norvegicus GN=Hprt1 PE=1 SV=1		3.77531	10.0917	2	2	2	1	218	24.462	6.54	High	4.50951	2
FALSE		Master Protein	O70513	Galectin-3-binding protein OS=Rattus norvegicus GN=Lgals3bp PE=1 SV=2		15.613	9.93031	5	6	5	1	574	63.701	5.35	High	15.5763	5
FALSE		Master Protein	Q810F4	Protein FAM3C OS=Rattus norvegicus GN=Fam3c PE=2 SV=1		4.66791	9.69163	2	2	2	1	227	24.698	8.29	High	5.3825	2
FALSE		Master Protein	Q02765	Cathepsin S OS=Rattus norvegicus GN=Ctss PE=2 SV=1		6.18977	9.39394	2	2	2	1	330	36.809	6.09	High	6.54305	2
FALSE		Master Protein	P28073	Proteasome subunit beta type-6 OS=Rattus norvegicus GN=Psmb6 PE=1 SV=3		3.91917	9.2437	2	2	2	1	238	25.273	5	High	3.00801	2
FALSE		Master Protein	P33436	72 kDa type IV collagenase OS=Rattus norvegicus GN=Mmp2 PE=1 SV=2		7.74948	9.2145	4	4	4	1	662	74.102	5.47	High	10.1721	4
FALSE		Master Protein	Q5RKI1	Eukaryotic initiation factor 4A-II OS=Rattus norvegicus GN=Eif4a2 PE=1 SV=1		6.78992	9.09091	3	3	3	1	407	46.373	5.48	High	8.53964	3
FALSE		Master Protein	P14408	Fumarate hydratase, mitochondrial OS=Rattus norvegicus GN=Fh PE=1 SV=1		5.44769	9.07298	4	4	4	1	507	54.429	8.95	High	9.02593	4
FALSE		Master Protein	P62909	40S ribosomal protein S3 OS=Rattus norvegicus GN=Rps3 PE=1 SV=1		3.8373	9.0535	2	2	2	1	243	26.657	9.66	High	6.03687	2
FALSE		Master Protein	P18292	Prothrombin OS=Rattus norvegicus GN=F2 PE=1 SV=1		18.0853	8.9141	4	6	4	1	617	70.367	6.71	High	20.2791	4
FALSE		Master Protein	P61589	Transforming protein RhoA OS=Rattus norvegicus GN=Rhoa PE=1 SV=1		2.5586	8.80829	2	2	2	1	193	21.768	6.1	High	3.8097	2
FALSE		Master Protein	P52296	Importin subunit beta-1 OS=Rattus norvegicus GN=Kpnb1 PE=1 SV=1		11.8041	8.8	5	5	5	1	875	97.062	4.77	High	14.5704	5
FALSE		Master Protein	Q6AXR4	Beta-hexosaminidase subunit beta OS=Rattus norvegicus GN=Hexb PE=2 SV=1		10.9112	8.75233	5	5	5	1	537	61.488	7.94	High	12.2012	5
FALSE		Master Protein	P38652	Phosphoglucomutase-1 OS=Rattus norvegicus GN=Pgm1 PE=1 SV=2		10.6891	8.71886	4	4	4	1	562	61.365	6.76	High	9.3453	4
FALSE		Master Protein	Q63081	Protein disulfide-isomerase A6 OS=Rattus norvegicus GN=Pdia6 PE=1 SV=2		9.60364	8.63636	3	3	3	1	440	48.143	5.14	High	10.0632	3
FALSE		Master Protein	P28480	T-complex protein 1 subunit alpha OS=Rattus norvegicus GN=Tcp1 PE=1 SV=1		10.6894	8.63309	4	5	4	1	556	60.322	6.21	High	14.4116	4
FALSE		Master Protein	Q5XIM9	T-complex protein 1 subunit beta OS=Rattus norvegicus GN=Cct2 PE=1 SV=3		6.1783	8.59813	3	3	3	1	535	57.422	6.46	High	8.92002	3
FALSE		Master Protein	P51886	Lumican OS=Rattus norvegicus GN=Lum PE=1 SV=1		3.37096	8.57988	3	3	3	1	338	38.255	6.43	High	5.93886	3
FALSE		Master Protein	Q6IMF3	Keratin, type II cytoskeletal 1 OS=Rattus norvegicus GN=Krt1 PE=2 SV=1		24.7987	8.48	7	13	5	1	625	64.791	7.87	High	34.719	7
FALSE		Master Protein	P10860	Glutamate dehydrogenase 1, mitochondrial OS=Rattus norvegicus GN=Glud1 PE=1 SV=2		8.05168	8.42294	4	4	4	1	558	61.377	8	High	10.4115	4
FALSE		Master Protein	O89049	Thioredoxin reductase 1, cytoplasmic OS=Rattus norvegicus GN=Txnrd1 PE=1 SV=5		5.77693	8.41683	3	3	3	1	499	54.637	6.47	High	3.56968	3
FALSE		Master Protein	P08699	Galectin-3 OS=Rattus norvegicus GN=Lgals3 PE=1 SV=4		4.29759	8.39695	2	2	2	1	262	27.184	8.57	High	6.43966	2
FALSE		Master Protein	P30835	ATP-dependent 6-phosphofructokinase, liver type OS=Rattus norvegicus GN=Pfkl PE=1 SV=3		11.6262	8.07692	5	5	5	1	780	85.284	7.4	High	13.0757	5
FALSE		Master Protein	Q9EQV9	Carboxypeptidase B2 OS=Rattus norvegicus GN=Cpb2 PE=2 SV=1		3.80119	8.05687	2	2	2	1	422	48.796	8.41	High	5.12806	2
FALSE		Master Protein	Q6IFV3	Keratin, type I cytoskeletal 15 OS=Rattus norvegicus GN=Krt15 PE=1 SV=1		10.3975	7.82998	6	11	2	1	447	48.84	4.86	High	18.4943	6
FALSE		Master Protein	Q6IG01	Keratin, type II cytoskeletal 1b OS=Rattus norvegicus GN=Krt77 PE=3 SV=1		16.2082	7.70713	5	15	1	1	519	57.22	5.64	High	38.3107	5
FALSE		Master Protein	Q10758	Keratin, type II cytoskeletal 8 OS=Rattus norvegicus GN=Krt8 PE=1 SV=3		16.291	7.66046	5	15	2	1	483	53.985	6	High	34.672	5
FALSE		Master Protein	A7VJC2	Heterogeneous nuclear ribonucleoproteins A2/B1 OS=Rattus norvegicus GN=Hnrnpa2b1 PE=1 SV=1		5.40557	7.64873	2	3	2	1	353	37.455	8.95	High	3.72599	2
FALSE		Master Protein	Q6IG02	Keratin, type II cytoskeletal 2 epidermal OS=Rattus norvegicus GN=Krt2 PE=3 SV=1		18.1203	7.59124	7	11	3	1	685	69.085	7.69	High	22.5927	7
FALSE		Master Protein	P35444	Cartilage oligomeric matrix protein OS=Rattus norvegicus GN=Comp PE=1 SV=1		15.8991	7.54967	4	5	3	1	755	82.611	4.73	High	16.3768	4
FALSE		Master Protein	Q66H12	Alpha-N-acetylgalactosaminidase OS=Rattus norvegicus GN=Naga PE=2 SV=1		3.98266	7.46988	2	2	2	1	415	46.84	5.86	High	5.13183	2
FALSE		Master Protein	Q6P7S1	Acid ceramidase OS=Rattus norvegicus GN=Asah1 PE=2 SV=1		4.24917	7.36041	2	2	2	1	394	44.415	8.31	High	5.40634	2
FALSE		Master Protein	P84092	AP-2 complex subunit mu OS=Rattus norvegicus GN=Ap2m1 PE=1 SV=1		5.08175	7.35632	2	2	2	1	435	49.623	9.54	High	6.06902	2
FALSE		Master Protein	P05982	NAD(P)H dehydrogenase [quinone] 1 OS=Rattus norvegicus GN=Nqo1 PE=1 SV=4		3.59796	7.29927	2	2	2	1	274	30.927	8.43	High	2.3758	2
FALSE		Master Protein	Q8VHF5	Citrate synthase, mitochondrial OS=Rattus norvegicus GN=Cs PE=1 SV=1		5.27017	7.29614	3	3	3	1	466	51.833	8.35	High	5.23779	3
FALSE		Master Protein	P19945	60S acidic ribosomal protein P0 OS=Rattus norvegicus GN=Rplp0 PE=1 SV=2		3.45366	7.25552	2	2	2	1	317	34.194	6.25	High	5.29835	2
FALSE		Master Protein	Q66H59	N-acetylneuraminate lyase OS=Rattus norvegicus GN=Npl PE=2 SV=1		4.17927	7.1875	2	2	2	1	320	35.093	6.93	High	4.06111	2
FALSE		Master Protein	P18484	AP-2 complex subunit alpha-2 OS=Rattus norvegicus GN=Ap2a2 PE=1 SV=3		9.08803	7.14286	5	5	5	1	938	103.979	6.93	High	11.9983	5
FALSE		Master Protein	P06238	Alpha-2-macroglobulin OS=Rattus norvegicus GN=A2m PE=2 SV=2		23.5147	6.79348	7	11	7	1	1472	163.682	6.29	High	25.9054	7
FALSE		Master Protein	P12346	Serotransferrin OS=Rattus norvegicus GN=Tf PE=1 SV=3		10.7321	6.59026	4	5	4	1	698	76.346	7.28	High	14.5066	4
FALSE		Master Protein	Q5U300	Ubiquitin-like modifier-activating enzyme 1 OS=Rattus norvegicus GN=Uba1 PE=1 SV=1		10.3642	6.52174	6	6	6	1	1058	117.713	5.57	High	11.4084	6
FALSE		Master Protein	P01946	Hemoglobin subunit alpha-1/2 OS=Rattus norvegicus GN=Hba1 PE=1 SV=3		1.97582	6.33803	2	2	2	1	142	15.319	7.97	High	4.75644	2
FALSE		Master Protein	P14942	Glutathione S-transferase alpha-4 OS=Rattus norvegicus GN=Gsta4 PE=1 SV=2		1.84325	6.30631	2	2	2	1	222	25.493	7.33	High	1.82864	2
FALSE		Master Protein	Q5FVI6	V-type proton ATPase subunit C 1 OS=Rattus norvegicus GN=Atp6v1c1 PE=2 SV=1		4.43273	6.28272	2	2	2	1	382	43.873	7.46	High	4.97938	2
FALSE		Master Protein	P41562	Isocitrate dehydrogenase [NADP] cytoplasmic OS=Rattus norvegicus GN=Idh1 PE=1 SV=1		3.62223	6.28019	2	2	2	1	414	46.705	6.99	High	2.87133	2
FALSE		Master Protein	Q641X3	Beta-hexosaminidase subunit alpha OS=Rattus norvegicus GN=Hexa PE=2 SV=1		5.57702	6.25	3	3	3	1	528	60.499	7.24	High	7.31044	3
FALSE		Master Protein	Q5XI32	F-actin-capping protein subunit beta OS=Rattus norvegicus GN=Capzb PE=1 SV=1		2.23944	6.25	2	2	2	1	272	30.609	6	High	2.36427	2
FALSE		Master Protein	P06760	Beta-glucuronidase OS=Rattus norvegicus GN=Gusb PE=2 SV=1		5.64341	6.17284	4	4	4	1	648	74.746	6.74	High	6.8377	4
FALSE		Master Protein	Q91Y81	Septin-2 OS=Rattus norvegicus GN=Sept2 PE=1 SV=1		2.87776	6.09418	2	2	2	1	361	41.566	6.6	High	4.43616	2
FALSE		Master Protein	P06866	Haptoglobin OS=Rattus norvegicus GN=Hp PE=1 SV=3		3.29262	6.05187	2	2	2	1	347	38.539	6.54	High	4.37064	2
FALSE		Master Protein	P49744	Thrombospondin-4 OS=Rattus norvegicus GN=Thbs4 PE=1 SV=1		13.2409	5.91837	5	5	4	1	980	108.145	4.75	High	12.0163	5
FALSE		Master Protein	Q32KJ6	N-acetylgalactosamine-6-sulfatase OS=Rattus norvegicus GN=Galns PE=1 SV=1		6.25508	5.91603	3	3	3	1	524	58.265	7.01	High	7.77606	3
FALSE		Master Protein	P13221	Aspartate aminotransferase, cytoplasmic OS=Rattus norvegicus GN=Got1 PE=1 SV=3		5.56444	5.81114	2	2	2	1	413	46.4	7.21	High	6.70289	2
FALSE		Master Protein	Q6P7C7	Transmembrane glycoprotein NMB OS=Rattus norvegicus GN=Gpnmb PE=2 SV=1		6.57031	5.76923	2	3	2	1	572	63.691	7.11	High	8.61115	2
FALSE		Master Protein	P85845	Fascin OS=Rattus norvegicus GN=Fscn1 PE=1 SV=2		3.28261	5.67951	2	2	2	1	493	54.457	6.74	High	5.52146	2
FALSE		Master Protein	Q63772	Growth arrest-specific protein 6 OS=Rattus norvegicus GN=Gas6 PE=1 SV=1		7.18068	5.63798	3	3	3	1	674	74.59	5.91	High	6.09575	3
FALSE		Master Protein	Q63416	Inter-alpha-trypsin inhibitor heavy chain H3 OS=Rattus norvegicus GN=Itih3 PE=2 SV=1		19.1825	5.63698	5	11	5	1	887	99.036	6.25	High	22.3893	5
FALSE		Master Protein	Q64268	Heparin cofactor 2 OS=Rattus norvegicus GN=Serpind1 PE=1 SV=1		4.49714	5.63674	2	3	2	1	479	54.517	6.96	High	2.54226	2
FALSE		Master Protein	Q9R0D6	Transcobalamin-2 OS=Rattus norvegicus GN=Tcn2 PE=2 SV=1		3.29834	5.38642	2	2	2	1	427	47.39	7.74	High	5.03292	2
FALSE		Master Protein	P10719	ATP synthase subunit beta, mitochondrial OS=Rattus norvegicus GN=Atp5b PE=1 SV=2		7.2291	5.10397	2	2	2	1	529	56.318	5.34	High	7.2263	2
FALSE		Master Protein	P20059	Hemopexin OS=Rattus norvegicus GN=Hpx PE=1 SV=3		6.24563	5	2	4	2	1	460	51.318	7.65	High	8.52897	2
FALSE		Master Protein	P02770	Serum albumin OS=Rattus norvegicus GN=Alb PE=1 SV=2		8.25644	4.93421	3	6	3	1	608	68.686	6.48	High	15.3373	3
FALSE		Master Protein	P27926	Hexokinase-3 OS=Rattus norvegicus GN=Hk3 PE=2 SV=1		7.38101	4.87013	4	4	4	1	924	100.189	5.48	High	7.93095	4
FALSE		Master Protein	Q9JI85	Nucleobindin-2 OS=Rattus norvegicus GN=Nucb2 PE=1 SV=1		3.59773	4.7619	2	2	2	1	420	50.059	5.11	High	4.49086	2
FALSE		Master Protein	Q6IFX1	Keratin, type I cytoskeletal 24 OS=Rattus norvegicus GN=Krt24 PE=3 SV=1		6.55168	4.68432	2	3	1	1	491	52.347	5.01	High	8.31155	2
FALSE		Master Protein	Q62812	Myosin-9 OS=Rattus norvegicus GN=Myh9 PE=1 SV=3		18.9634	4.64049	7	8	7	1	1961	226.197	5.6	High	23.5928	7
FALSE		Master Protein	Q9QZA2	Programmed cell death 6-interacting protein OS=Rattus norvegicus GN=Pdcd6ip PE=1 SV=2		6.15697	4.46735	3	3	3	1	873	96.57	6.52	High	7.82742	3
FALSE		Master Protein	Q7TPB1	T-complex protein 1 subunit delta OS=Rattus norvegicus GN=Cct4 PE=1 SV=3		4.20604	4.45269	2	2	2	1	539	58.063	8.02	High	3.22335	2
FALSE		Master Protein	P00689	Pancreatic alpha-amylase OS=Rattus norvegicus GN=Amy2 PE=2 SV=2		4.13121	4.33071	2	3	2	1	508	57.141	8.07	High	8.05896	2
FALSE		Master Protein	Q4G061	Eukaryotic translation initiation factor 3 subunit B OS=Rattus norvegicus GN=Eif3b PE=1 SV=1		3.67522	4.266	2	2	2	1	797	90.854	5.08	High	5.1502	2
FALSE		Master Protein	Q4FZT9	26S proteasome non-ATPase regulatory subunit 2 OS=Rattus norvegicus GN=Psmd2 PE=1 SV=1		5.59737	3.96476	3	3	3	1	908	100.124	5.2	High	8.07392	3
FALSE		Master Protein	P13383	Nucleolin OS=Rattus norvegicus GN=Ncl PE=1 SV=3		5.67499	3.78682	3	3	3	1	713	77.101	4.74	High	6.10021	3
FALSE		Master Protein	P23514	Coatomer subunit beta OS=Rattus norvegicus GN=Copb1 PE=1 SV=1		7.27273	3.77754	3	4	3	1	953	106.943	5.96	High	7.80639	3
FALSE		Master Protein	P24090	Alpha-2-HS-glycoprotein OS=Rattus norvegicus GN=Ahsg PE=1 SV=2		2.36169	3.69318	2	3	2	1	352	37.958	6.51	High	3.88353	2
FALSE		Master Protein	Q6IG04	Keratin, type II cytoskeletal 72 OS=Rattus norvegicus GN=Krt72 PE=3 SV=2		3.69551	3.65385	2	2	1	1	520	56.816	7.36	High	5.38234	2
FALSE		Master Protein	O55012	Phosphatidylinositol-binding clathrin assembly protein OS=Rattus norvegicus GN=Picalm PE=1 SV=1		4.83923	3.28125	2	2	2	1	640	69.242	8.46	High	5.39561	2
FALSE		Master Protein	Q4QQW8	Putative phospholipase B-like 2 OS=Rattus norvegicus GN=Plbd2 PE=1 SV=2		2.63879	3.24786	2	2	2	1	585	65.414	6.7	High	2.54766	2
FALSE		Master Protein	Q63598	Plastin-3 OS=Rattus norvegicus GN=Pls3 PE=1 SV=2		3.72092	3.1746	2	2	2	1	630	70.635	5.48	High	5.01591	2
FALSE		Master Protein	P48679	Prelamin-A/C OS=Rattus norvegicus GN=Lmna PE=1 SV=1		3.86517	3.15789	2	2	2	1	665	74.279	6.98	High	4.71941	2
FALSE		Master Protein	P52303	AP-1 complex subunit beta-1 OS=Rattus norvegicus GN=Ap1b1 PE=1 SV=1		4.92404	2.73973	3	3	3	1	949	104.522	5.14	High	2.72445	3
FALSE		Master Protein	O35567	Bifunctional purine biosynthesis protein PURH OS=Rattus norvegicus GN=Atic PE=1 SV=2		2.50832	2.7027	2	2	2	1	592	64.168	7.14	High	2.13446	2
FALSE		Master Protein	Q6IUU3	Sulfhydryl oxidase 1 OS=Rattus norvegicus GN=Qsox1 PE=1 SV=1		2.05454	2.53333	2	2	2	1	750	82.36	7.93	High	3.82688	2
FALSE		Master Protein	P08649	Complement C4 OS=Rattus norvegicus GN=C4 PE=1 SV=3		9.05639	2.47553	4	5	4	1	1737	192.042	7.33	High	8.3049	4
FALSE		Master Protein	P09811	Glycogen phosphorylase, liver form OS=Rattus norvegicus GN=Pygl PE=1 SV=5		2.91015	2.47059	2	2	2	1	850	97.421	7.2	High	2.36634	2
FALSE		Master Protein	P85972	Vinculin OS=Rattus norvegicus GN=Vcl PE=1 SV=1		4.15186	2.43902	2	2	2	1	1066	116.542	6.09	High	5.15653	2
FALSE		Master Protein	P02466	Collagen alpha-2(I) chain OS=Rattus norvegicus GN=Col1a2 PE=1 SV=3		2.60101	2.04082	2	2	2	1	1372	129.486	9.33	High	2.92157	2
FALSE		Master Protein	Q01177	Plasminogen OS=Rattus norvegicus GN=Plg PE=2 SV=2		2.43463	1.97044	2	2	2	1	812	90.477	7.08	High	4.01502	2
FALSE		Master Protein	P38650	Cytoplasmic dynein 1 heavy chain 1 OS=Rattus norvegicus GN=Dync1h1 PE=1 SV=1		10.5658	1.44272	6	6	6	1	4644	531.916	6.46	High	11.4591	6
FALSE		Master Protein	Q9ERB4	Versican core protein (Fragments) OS=Rattus norvegicus GN=Vcan PE=2 SV=2		8.42921	1.38787	3	3	3	1	2738	299.821	4.58	High	10.2435	3
FALSE		Master Protein	D3ZHA0	Filamin-C OS=Rattus norvegicus GN=Flnc PE=1 SV=1		6.19369	1.3573	4	4	4	1	2726	290.804	5.9	High	9.67433	4
FALSE		Master Protein	Q63041	Alpha-1-macroglobulin OS=Rattus norvegicus GN=A1m PE=1 SV=1		4.84563	1.33333	2	2	2	1	1500	167.019	6.9	High	5.25102	2
FALSE		Master Protein	Q7TMA5	Apolipoprotein B-100 OS=Rattus norvegicus GN=Apob PE=1 SV=1		10.7558	1.26502	6	6	6	1	4743	535.688	7.42	High	8.20955	6
