# Supplementary material for: The Brain Origin of Neonatal Microglia Determines the Content of Exosomes and Biological Function
Source: Preprints.org preprint supplement (doi:10.20944/preprints201907.0102.v1), 2019-07-08
Supplement: Supplementary file 14 [file Supplementary data 6.xlsx]

## Sheet: Proteins
Checked	Protein FDR Confidence	Master	Accession	Description	Exp. q-value	Sum PEP Score	Coverage	# Peptides	# PSMs	# Unique Peptides	# Protein Groups	# AAs	MW [kDa]	calc. pI	Found in Sample: [S1] F1: Sample	Score Sequest HT	# Peptides Sequest HT
FALSE		Master Protein	P04937	Fibronectin OS=Rattus norvegicus GN=Fn1 PE=1 SV=2		307.482	42.5515	64	96	64	1	2477	272.341	5.76	High	323.662	64
FALSE		Master Protein	P01026	Complement C3 OS=Rattus norvegicus GN=C3 PE=1 SV=3		152.062	36.9212	49	61	49	1	1663	186.342	6.54	High	172.187	49
FALSE		Master Protein	P60711	Actin, cytoplasmic 1 OS=Rattus norvegicus GN=Actb PE=1 SV=1		100.66	61.3333	17	32	8	1	375	41.71	5.48	High	109.567	17
FALSE		Master Protein	P11442	Clathrin heavy chain 1 OS=Rattus norvegicus GN=Cltc PE=1 SV=3		96.2711	24.8955	32	34	32	1	1675	191.477	5.72	High	103.515	32
FALSE		Master Protein	P06238	Alpha-2-macroglobulin OS=Rattus norvegicus GN=A2m PE=2 SV=2		80.8096	23.5054	25	31	24	1	1472	163.682	6.29	High	88.8568	25
FALSE		Master Protein	P00787	Cathepsin B OS=Rattus norvegicus GN=Ctsb PE=1 SV=2		74.3526	39.233	12	22	12	1	339	37.446	5.6	High	68.6898	12
FALSE		Master Protein	P04764	Alpha-enolase OS=Rattus norvegicus GN=Eno1 PE=1 SV=4		69.1747	55.2995	17	22	17	1	434	47.098	6.57	High	67.1743	17
FALSE		Master Protein	P34058	Heat shock protein HSP 90-beta OS=Rattus norvegicus GN=Hsp90ab1 PE=1 SV=4		64.7669	40.7459	24	30	13	1	724	83.229	5.03	High	76.9721	24
FALSE		Master Protein	P02650	Apolipoprotein E OS=Rattus norvegicus GN=Apoe PE=1 SV=2		63.7706	38.4615	14	28	14	1	312	35.731	5.27	High	74.5063	14
FALSE		Master Protein	Q9QXQ0	Alpha-actinin-4 OS=Rattus norvegicus GN=Actn4 PE=1 SV=2		63.5757	31.8332	21	24	12	1	911	104.849	5.44	High	70.9345	21
FALSE		Master Protein	P82995	Heat shock protein HSP 90-alpha OS=Rattus norvegicus GN=Hsp90aa1 PE=1 SV=3		61.0384	32.1965	22	26	12	1	733	84.762	5.01	High	68.2176	22
FALSE		Master Protein	P10960	Prosaposin OS=Rattus norvegicus GN=Psap PE=1 SV=1		59.4805	44.7653	21	26	21	1	554	61.084	5.25	High	68.2863	21
FALSE		Master Protein	Q62667	Major vault protein OS=Rattus norvegicus GN=Mvp PE=1 SV=4		59.0214	37.9791	24	27	24	1	861	95.739	5.58	High	68.6784	24
FALSE		Master Protein	Q6IFV1	Keratin, type I cytoskeletal 14 OS=Rattus norvegicus GN=Krt14 PE=2 SV=1		56.9221	31.9588	15	22	4	1	485	52.651	5.16	High	61.0192	15
FALSE		Master Protein	P85973	Purine nucleoside phosphorylase OS=Rattus norvegicus GN=Pnp PE=1 SV=1		56.0175	64.3599	14	20	14	1	289	32.281	6.93	High	60.4656	14
FALSE		Master Protein	P08721	Osteopontin OS=Rattus norvegicus GN=Spp1 PE=1 SV=2		55.1161	48.265	9	15	9	1	317	34.942	4.53	High	56.4617	9
FALSE		Master Protein	Q68FS4	Cytosol aminopeptidase OS=Rattus norvegicus GN=Lap3 PE=1 SV=1		53.2961	53.1792	19	20	19	1	519	56.115	7.21	High	60.0606	19
FALSE		Master Protein	O70513	Galectin-3-binding protein OS=Rattus norvegicus GN=Lgals3bp PE=1 SV=2		53.1847	29.0941	13	20	13	1	574	63.701	5.35	High	60.8436	13
FALSE		Master Protein	Q9ERB4	Versican core protein (Fragments) OS=Rattus norvegicus GN=Vcan PE=2 SV=2		51.799	6.97589	17	22	17	1	2738	299.821	4.58	High	58.1508	17
FALSE		Master Protein	P60901	Proteasome subunit alpha type-6 OS=Rattus norvegicus GN=Psma6 PE=1 SV=1		51.4328	52.8455	12	17	12	1	246	27.382	6.76	High	53.6647	12
FALSE		Master Protein	P02793	Ferritin light chain 1 OS=Rattus norvegicus GN=Ftl1 PE=1 SV=3		49.3377	68.8525	9	16	9	1	183	20.736	6.43	High	50.7134	9
FALSE		Master Protein	P63018	Heat shock cognate 71 kDa protein OS=Rattus norvegicus GN=Hspa8 PE=1 SV=1		48.5246	34.5201	17	18	16	1	646	70.827	5.52	High	51.5719	17
FALSE		Master Protein	P18420	Proteasome subunit alpha type-1 OS=Rattus norvegicus GN=Psma1 PE=1 SV=2		48.4117	67.3004	12	16	12	1	263	29.499	6.61	High	47.6937	12
FALSE		Master Protein	P04642	L-lactate dehydrogenase A chain OS=Rattus norvegicus GN=Ldha PE=1 SV=1		48.2037	50.6024	18	23	16	1	332	36.427	8.27	High	54.0257	18
FALSE		Master Protein	P05065	Fructose-bisphosphate aldolase A OS=Rattus norvegicus GN=Aldoa PE=1 SV=2		48.1632	42.8571	11	16	9	1	364	39.327	8.09	High	51.1897	11
FALSE		Master Protein	Q9Z1P2	Alpha-actinin-1 OS=Rattus norvegicus GN=Actn1 PE=1 SV=1		47.1115	19.0583	14	17	5	1	892	102.896	5.38	High	47.7352	14
FALSE		Master Protein	Q6IFU7	Keratin, type I cytoskeletal 42 OS=Rattus norvegicus GN=Krt42 PE=3 SV=1		47.1069	27.2124	16	21	5	1	452	50.182	5.16	High	54.4967	16
FALSE		Master Protein	Q6P0K8	Junction plakoglobin OS=Rattus norvegicus GN=Jup PE=1 SV=1		45.2348	22.8188	13	16	13	1	745	81.749	6.14	High	46.0716	13
FALSE		Master Protein	Q6P6Q2	Keratin, type II cytoskeletal 5 OS=Rattus norvegicus GN=Krt5 PE=1 SV=1		44.7957	22.9167	15	27	8	1	576	61.788	7.8	High	75.4256	15
FALSE		Master Protein	O35763	Moesin OS=Rattus norvegicus GN=Msn PE=1 SV=3		44.7322	29.8094	16	18	16	1	577	67.697	6.54	High	43.9091	16
FALSE		Master Protein	P11980	Pyruvate kinase PKM OS=Rattus norvegicus GN=Pkm PE=1 SV=3		44.4619	39.3597	15	16	15	1	531	57.781	7.06	High	54.5571	15
FALSE		Master Protein	Q6AYZ1	Tubulin alpha-1C chain OS=Rattus norvegicus GN=Tuba1c PE=1 SV=1		43.8243	39.4209	12	14	4	1	449	49.905	5.1	High	43.368	12
FALSE		Master Protein	Q5XIF6	Tubulin alpha-4A chain OS=Rattus norvegicus GN=Tuba4a PE=1 SV=1		43.0066	38.1696	12	14	4	1	448	49.892	5.06	High	43.0236	12
FALSE		Master Protein	P68035	Actin, alpha cardiac muscle 1 OS=Rattus norvegicus GN=Actc1 PE=2 SV=1		42.5483	33.1565	11	20	2	1	377	41.992	5.39	High	53.2313	11
FALSE		Master Protein	P23785	Granulins OS=Rattus norvegicus GN=Grn PE=1 SV=3		41.2111	24.1497	11	15	11	1	588	63.325	6.47	High	38.8223	11
FALSE		Master Protein	P69897	Tubulin beta-5 chain OS=Rattus norvegicus GN=Tubb5 PE=1 SV=1		41.0954	40.3153	13	15	2	1	444	49.639	4.89	High	42.9801	13
FALSE		Master Protein	P05371	Clusterin OS=Rattus norvegicus GN=Clu PE=1 SV=2		40.9781	28.6353	10	13	10	1	447	51.342	5.71	High	39.5454	10
FALSE		Master Protein	Q6P734	Plasma protease C1 inhibitor OS=Rattus norvegicus GN=Serping1 PE=2 SV=1		39.3729	29.5635	11	13	11	1	504	55.576	5.83	High	36.9857	11
FALSE		Master Protein	Q6P9T8	Tubulin beta-4B chain OS=Rattus norvegicus GN=Tubb4b PE=1 SV=1		38.8914	36.8539	12	14	1	1	445	49.769	4.89	High	42.3448	12
FALSE		Master Protein	Q9R0J8	Legumain OS=Rattus norvegicus GN=Lgmn PE=1 SV=1		38.6981	26.6667	7	12	7	1	435	49.434	6.58	High	31.6223	7
FALSE		Master Protein	Q6IFW6	Keratin, type I cytoskeletal 10 OS=Rattus norvegicus GN=Krt10 PE=3 SV=1		38.6911	14.4487	11	18	9	1	526	56.47	5.15	High	48.4146	11
FALSE		Master Protein	P05197	Elongation factor 2 OS=Rattus norvegicus GN=Eef2 PE=1 SV=4		37.8277	24.8252	14	14	14	1	858	95.223	6.83	High	40.9802	14
FALSE		Master Protein	P50282	Matrix metalloproteinase-9 OS=Rattus norvegicus GN=Mmp9 PE=2 SV=1		37.6436	21.1864	12	15	12	1	708	78.561	6.07	High	41.916	12
FALSE		Master Protein	P24268	Cathepsin D OS=Rattus norvegicus GN=Ctsd PE=1 SV=1		36.9802	38.0835	12	16	12	1	407	44.652	7.09	High	44.342	12
FALSE		Master Protein	P63102	14-3-3 protein zeta/delta OS=Rattus norvegicus GN=Ywhaz PE=1 SV=1		36.6412	43.2653	9	11	7	1	245	27.754	4.79	High	37.5801	9
FALSE		Master Protein	Q6P6V0	Glucose-6-phosphate isomerase OS=Rattus norvegicus GN=Gpi PE=1 SV=1		36.6282	26.3441	11	14	11	1	558	62.787	7.77	High	39.4855	11
FALSE		Master Protein	P48500	Triosephosphate isomerase OS=Rattus norvegicus GN=Tpi1 PE=1 SV=2		36.5632	42.5703	8	12	8	1	249	26.832	7.24	High	35.7078	8
FALSE		Master Protein	P47853	Biglycan OS=Rattus norvegicus GN=Bgn PE=1 SV=1		36.2893	30.0813	10	14	10	1	369	41.68	7.52	High	40.869	10
FALSE		Master Protein	Q63691	Monocyte differentiation antigen CD14 OS=Rattus norvegicus GN=Cd14 PE=2 SV=2		35.8787	28.4946	9	11	9	1	372	40.029	5.52	High	37.4304	9
FALSE		Master Protein	P34064	Proteasome subunit alpha type-5 OS=Rattus norvegicus GN=Psma5 PE=1 SV=1		35.3322	54.3568	8	10	8	1	241	26.374	4.86	High	36.165	8
FALSE		Master Protein	Q6IFU8	Keratin, type I cytoskeletal 17 OS=Rattus norvegicus GN=Krt17 PE=1 SV=1		35.2903	25.1732	15	18	4	1	433	48.093	5.02	High	45.4353	15
FALSE		Master Protein	P48004	Proteasome subunit alpha type-7 OS=Rattus norvegicus GN=Psma7 PE=1 SV=1		35.0915	51.1811	12	16	12	1	254	28.309	8.68	High	41.3663	12
FALSE		Master Protein	Q68FP1	Gelsolin OS=Rattus norvegicus GN=Gsn PE=1 SV=1		33.6592	14.6154	9	12	9	1	780	86.014	6.09	High	33.3829	9
FALSE		Master Protein	P16617	Phosphoglycerate kinase 1 OS=Rattus norvegicus GN=Pgk1 PE=1 SV=2		32.9058	34.5324	11	13	11	1	417	44.51	7.9	High	30.2649	11
FALSE		Master Protein	P70645	Bleomycin hydrolase OS=Rattus norvegicus GN=Blmh PE=1 SV=1		32.7662	41.1894	13	14	13	1	454	52.289	6.48	High	31.7953	13
FALSE		Master Protein	P33436	72 kDa type IV collagenase OS=Rattus norvegicus GN=Mmp2 PE=1 SV=2		32.4683	21.4502	10	10	10	1	662	74.102	5.47	High	29.7027	10
FALSE		Master Protein	P17220	Proteasome subunit alpha type-2 OS=Rattus norvegicus GN=Psma2 PE=1 SV=3		31.7379	39.7436	6	9	6	1	234	25.91	7.43	High	31.5551	6
FALSE		Master Protein	P02454	Collagen alpha-1(I) chain OS=Rattus norvegicus GN=Col1a1 PE=1 SV=5		31.7318	12.3193	12	12	12	1	1453	137.869	5.92	High	36.1505	12
FALSE		Master Protein	Q6P6T1	Complement C1s subcomponent OS=Rattus norvegicus GN=C1s PE=2 SV=2		31.5775	20.6395	12	14	12	1	688	77.022	4.77	High	30.3434	12
FALSE		Master Protein	P50137	Transketolase OS=Rattus norvegicus GN=Tkt PE=1 SV=1		31.1421	23.435	11	13	11	1	623	67.601	7.49	High	31.5719	11
FALSE		Master Protein	P12346	Serotransferrin OS=Rattus norvegicus GN=Tf PE=1 SV=3		31.0136	15.7593	10	12	10	1	698	76.346	7.28	High	29.9067	10
FALSE		Master Protein	P19132	Ferritin heavy chain OS=Rattus norvegicus GN=Fth1 PE=1 SV=3		30.9498	50	9	14	9	1	182	21.113	6.3	High	35.6916	9
FALSE		Master Protein	P40112	Proteasome subunit beta type-3 OS=Rattus norvegicus GN=Psmb3 PE=1 SV=1		30.8988	39.0244	7	10	7	1	205	22.949	6.55	High	31.5446	7
FALSE		Master Protein	Q6IMF3	Keratin, type II cytoskeletal 1 OS=Rattus norvegicus GN=Krt1 PE=2 SV=1		30.5281	8.48	8	12	6	1	625	64.791	7.87	High	38.7098	8
FALSE		Master Protein	P18422	Proteasome subunit alpha type-3 OS=Rattus norvegicus GN=Psma3 PE=1 SV=3		30.3105	26.6667	7	12	7	1	255	28.401	5.44	High	30.6508	7
FALSE		Master Protein	Q62632	Follistatin-related protein 1 OS=Rattus norvegicus GN=Fstl1 PE=1 SV=1		29.6698	29.7386	7	11	7	1	306	34.6	5.99	High	27.0216	7
FALSE		Master Protein	Q5I0D7	Xaa-Pro dipeptidase OS=Rattus norvegicus GN=Pepd PE=2 SV=1		29.352	24.187	9	10	9	1	492	54.715	5.95	High	31.2988	9
FALSE		Master Protein	P07154	Cathepsin L1 OS=Rattus norvegicus GN=Ctsl PE=1 SV=2		29.1171	35.3293	9	11	9	1	334	37.636	6.83	High	34.8494	9
FALSE		Master Protein	P62260	14-3-3 protein epsilon OS=Rattus norvegicus GN=Ywhae PE=1 SV=1		29.0436	41.1765	9	11	8	1	255	29.155	4.74	High	28.9546	9
FALSE		Master Protein	P21670	Proteasome subunit alpha type-4 OS=Rattus norvegicus GN=Psma4 PE=1 SV=1		27.5978	40.2299	9	11	9	1	261	29.479	7.72	High	30.2295	9
FALSE		Master Protein	P50399	Rab GDP dissociation inhibitor beta OS=Rattus norvegicus GN=Gdi2 PE=1 SV=2		27.5448	30.1124	10	12	7	1	445	50.505	6.25	High	27.0842	10
FALSE		Master Protein	P04785	Protein disulfide-isomerase OS=Rattus norvegicus GN=P4hb PE=1 SV=2		27.2148	27.8978	13	14	13	1	509	56.916	4.93	High	27.1531	13
FALSE		Master Protein	P04797	Glyceraldehyde-3-phosphate dehydrogenase OS=Rattus norvegicus GN=Gapdh PE=1 SV=3		25.8571	30.6306	7	9	7	1	333	35.805	8.03	High	23.2031	7
FALSE		Master Protein	P06761	78 kDa glucose-regulated protein OS=Rattus norvegicus GN=Hspa5 PE=1 SV=1		25.808	16.6667	8	10	8	1	654	72.302	5.16	High	28.0743	8
FALSE		Master Protein	P28075	Proteasome subunit beta type-5 OS=Rattus norvegicus GN=Psmb5 PE=1 SV=3		25.7768	38.403	9	10	9	1	263	28.567	7.02	High	32.0932	9
FALSE		Master Protein	P25113	Phosphoglycerate mutase 1 OS=Rattus norvegicus GN=Pgam1 PE=1 SV=4		25.4731	55.1181	8	11	8	1	254	28.814	7.18	High	30.8809	8
FALSE		Master Protein	P18421	Proteasome subunit beta type-1 OS=Rattus norvegicus GN=Psmb1 PE=1 SV=3		25.2954	43.3333	9	12	9	1	240	26.462	7.36	High	32.8587	9
FALSE		Master Protein	Q62812	Myosin-9 OS=Rattus norvegicus GN=Myh9 PE=1 SV=3		25.0176	6.17032	10	10	8	1	1961	226.197	5.6	High	27.2266	10
FALSE		Master Protein	Q9R1T3	Cathepsin Z OS=Rattus norvegicus GN=Ctsz PE=1 SV=2		24.891	28.4314	8	10	8	1	306	34.172	7.15	High	28.681	8
FALSE		Master Protein	Q9QZA2	Programmed cell death 6-interacting protein OS=Rattus norvegicus GN=Pdcd6ip PE=1 SV=2		24.0822	13.8603	8	9	8	1	873	96.57	6.52	High	24.5682	8
FALSE		Master Protein	P16975	SPARC OS=Rattus norvegicus GN=Sparc PE=1 SV=4		23.8992	27.907	9	12	9	1	301	34.274	4.89	High	26.2386	9
FALSE		Master Protein	P31000	Vimentin OS=Rattus norvegicus GN=Vim PE=1 SV=2		23.5583	24.6781	11	11	11	1	466	53.7	5.12	High	24.2547	11
FALSE		Master Protein	P42123	L-lactate dehydrogenase B chain OS=Rattus norvegicus GN=Ldhb PE=1 SV=2		23.2061	29.6407	9	11	7	1	334	36.589	6.05	High	17.5772	9
FALSE		Master Protein	P27926	Hexokinase-3 OS=Rattus norvegicus GN=Hk3 PE=2 SV=1		22.9363	16.7749	10	10	10	1	924	100.189	5.48	High	26.4945	10
FALSE		Master Protein	P40307	Proteasome subunit beta type-2 OS=Rattus norvegicus GN=Psmb2 PE=1 SV=1		22.931	37.3134	7	9	7	1	201	22.898	7.44	High	25.4185	7
FALSE		Master Protein	Q5XI73	Rho GDP-dissociation inhibitor 1 OS=Rattus norvegicus GN=Arhgdia PE=1 SV=1		21.967	40.6863	6	6	6	1	204	23.393	5.2	High	19.033	6
FALSE		Master Protein	P31721	Complement C1q subcomponent subunit B OS=Rattus norvegicus GN=C1qb PE=1 SV=2		21.4766	27.2727	5	7	5	1	253	26.573	9	High	22.5022	5
FALSE		Master Protein	P00697	Lysozyme C-1 OS=Rattus norvegicus GN=Lyz1 PE=1 SV=2		21.294	33.1081	3	5	3	1	148	16.718	9.1	High	20.4677	3
FALSE		Master Protein	P07895	Superoxide dismutase [Mn], mitochondrial OS=Rattus norvegicus GN=Sod2 PE=1 SV=2		21.1764	35.1351	7	8	7	1	222	24.659	8.81	High	19.0116	7
FALSE		Master Protein	P85968	6-phosphogluconate dehydrogenase, decarboxylating OS=Rattus norvegicus GN=Pgd PE=1 SV=1		20.9848	21.5321	9	9	9	1	483	53.202	7.02	High	20.3471	9
FALSE		Master Protein	P62630	Elongation factor 1-alpha 1 OS=Rattus norvegicus GN=Eef1a1 PE=2 SV=1		20.928	25.7576	8	9	8	1	462	50.082	9.01	High	27.5883	8
FALSE		Master Protein	Q4FZU2	Keratin, type II cytoskeletal 6A OS=Rattus norvegicus GN=Krt6a PE=1 SV=1		20.5339	14.4928	8	13	3	1	552	59.213	7.94	High	36.0641	8
FALSE		Master Protein	Q07936	Annexin A2 OS=Rattus norvegicus GN=Anxa2 PE=1 SV=2		20.488	23.8938	7	8	7	1	339	38.654	7.69	High	23.6485	7
FALSE		Master Protein	B5DFC9	Nidogen-2 OS=Rattus norvegicus GN=Nid2 PE=2 SV=1		20.3207	7.73639	9	9	9	1	1396	152.88	5.47	High	23.4874	9
FALSE		Master Protein	P11598	Protein disulfide-isomerase A3 OS=Rattus norvegicus GN=Pdia3 PE=1 SV=2		19.7893	21.1881	10	10	10	1	505	56.588	6.21	High	23.5422	10
FALSE		Master Protein	Q4V7C7	Actin-related protein 3 OS=Rattus norvegicus GN=Actr3 PE=1 SV=1		19.7578	22.7273	7	7	7	1	418	47.327	5.88	High	20.8038	7
FALSE		Master Protein	P31722	Complement C1q subcomponent subunit C OS=Rattus norvegicus GN=C1qc PE=1 SV=2		19.6834	25.3061	5	7	5	1	245	25.67	8.32	High	18.6142	5
FALSE		Master Protein	P09495	Tropomyosin alpha-4 chain OS=Rattus norvegicus GN=Tpm4 PE=1 SV=3		19.3705	21.371	6	7	4	1	248	28.492	4.69	High	18.6248	6
FALSE		Master Protein	Q08163	Adenylyl cyclase-associated protein 1 OS=Rattus norvegicus GN=Cap1 PE=1 SV=3		19.2962	14.346	6	8	6	1	474	51.556	7.52	High	21.4263	6
FALSE		Master Protein	P07335	Creatine kinase B-type OS=Rattus norvegicus GN=Ckb PE=1 SV=2		19.2613	28.3465	7	7	7	1	381	42.698	5.67	High	20.4718	7
FALSE		Master Protein	P18292	Prothrombin OS=Rattus norvegicus GN=F2 PE=1 SV=1		19.1362	8.9141	5	6	5	1	617	70.367	6.71	High	19.6958	5
FALSE		Master Protein	P51635	Alcohol dehydrogenase [NADP(+)] OS=Rattus norvegicus GN=Akr1a1 PE=1 SV=2		18.9583	28.3077	8	8	8	1	325	36.483	7.31	High	22.4192	8
FALSE		Master Protein	Q9QXY8	C-C motif chemokine 7 OS=Rattus norvegicus GN=Ccl7 PE=3 SV=1		18.6891	32.9897	3	8	3	1	97	10.899	9.33	High	16.9222	3
FALSE		Master Protein	P19804	Nucleoside diphosphate kinase B OS=Rattus norvegicus GN=Nme2 PE=1 SV=1		18.6645	44.7368	5	7	2	1	152	17.272	7.44	High	19.478	5
FALSE		Master Protein	Q6IG05	Keratin, type II cytoskeletal 75 OS=Rattus norvegicus GN=Krt75 PE=3 SV=2		18.3009	12.5461	7	12	1	1	542	58.991	8.07	High	33.9093	7
FALSE		Master Protein	Q63083	Nucleobindin-1 OS=Rattus norvegicus GN=Nucb1 PE=1 SV=1		18.1782	18.0828	7	7	7	1	459	53.474	5.12	High	19.0516	7
FALSE		Master Protein	Q6Q0N1	Cytosolic non-specific dipeptidase OS=Rattus norvegicus GN=Cndp2 PE=1 SV=1		17.9372	20.4211	7	7	7	1	475	52.66	5.66	High	21.1001	7
FALSE		Master Protein	P62963	Profilin-1 OS=Rattus norvegicus GN=Pfn1 PE=1 SV=2		17.892	45.7143	5	6	5	1	140	14.948	8.28	High	15.3362	5
FALSE		Master Protein	P06302	Prothymosin alpha OS=Rattus norvegicus GN=Ptma PE=1 SV=2		17.837	22.3214	5	6	5	1	112	12.375	3.84	High	16.9677	5
FALSE		Master Protein	Q10758	Keratin, type II cytoskeletal 8 OS=Rattus norvegicus GN=Krt8 PE=1 SV=3		17.7254	9.52381	6	12	2	1	483	53.985	6	High	34.2691	6
FALSE		Master Protein	Q63416	Inter-alpha-trypsin inhibitor heavy chain H3 OS=Rattus norvegicus GN=Itih3 PE=2 SV=1		17.65	6.5389	7	9	7	1	887	99.036	6.25	High	18.8666	7
FALSE		Master Protein	P13941	Collagen alpha-1(III) chain OS=Rattus norvegicus GN=Col3a1 PE=2 SV=3		17.6278	7.04033	7	7	7	1	1463	138.851	6.52	High	21.5222	7
FALSE		Master Protein	P35444	Cartilage oligomeric matrix protein OS=Rattus norvegicus GN=Comp PE=1 SV=1		17.5739	9.00662	6	6	5	1	755	82.611	4.73	High	18.8609	6
FALSE		Master Protein	Q99376	Transferrin receptor protein 1 (Fragment) OS=Rattus norvegicus GN=Tfrc PE=2 SV=1		17.5477	14.791	9	9	9	1	622	70.109	6.61	High	20.8581	9
FALSE		Master Protein	Q7TMA5	Apolipoprotein B-100 OS=Rattus norvegicus GN=Apob PE=1 SV=1		17.3781	1.62345	8	10	8	1	4743	535.688	7.42	High	18.6654	8
FALSE		Master Protein	Q63610	Tropomyosin alpha-3 chain OS=Rattus norvegicus GN=Tpm3 PE=1 SV=2		17.0755	22.9839	6	6	4	1	248	28.989	4.78	High	18.8495	6
FALSE		Master Protein	Q5M7U6	Actin-related protein 2 OS=Rattus norvegicus GN=Actr2 PE=2 SV=1		16.6125	17.2589	5	6	5	1	394	44.705	6.74	High	15.8127	5
FALSE		Master Protein	P18418	Calreticulin OS=Rattus norvegicus GN=Calr PE=1 SV=1		16.5562	16.8269	5	5	5	1	416	47.966	4.49	High	18.1703	5
FALSE		Master Protein	O88989	Malate dehydrogenase, cytoplasmic OS=Rattus norvegicus GN=Mdh1 PE=1 SV=3		16.2863	19.7605	5	5	5	1	334	36.46	6.58	High	16.1191	5
FALSE		Master Protein	Q4KM35	Proteasome subunit beta type-10 OS=Rattus norvegicus GN=Psmb10 PE=2 SV=1		16.2613	21.2454	4	4	4	1	273	29.02	6.64	High	13.7623	4
FALSE		Master Protein	Q63716	Peroxiredoxin-1 OS=Rattus norvegicus GN=Prdx1 PE=1 SV=1		16.2286	43.2161	8	9	8	1	199	22.095	8.13	High	20.8826	8
FALSE		Master Protein	Q00715	Histone H2B type 1 OS=Rattus norvegicus PE=1 SV=2		16.0184	27.2	4	6	4	1	125	13.982	10.36	High	14.6034	4
FALSE		Master Protein	P34067	Proteasome subunit beta type-4 OS=Rattus norvegicus GN=Psmb4 PE=1 SV=2		16.0139	23.5741	5	7	5	1	263	29.178	6.92	High	17.4504	5
FALSE		Master Protein	P30349	Leukotriene A-4 hydrolase OS=Rattus norvegicus GN=Lta4h PE=2 SV=2		15.6877	15.5738	8	8	8	1	610	69.132	6.04	High	16.3859	8
FALSE		Master Protein	Q5RKI0	WD repeat-containing protein 1 OS=Rattus norvegicus GN=Wdr1 PE=1 SV=3		15.6808	13.3663	6	7	6	1	606	66.14	6.62	High	14.2009	6
FALSE		Master Protein	Q9EPB1	Dipeptidyl peptidase 2 OS=Rattus norvegicus GN=Dpp7 PE=1 SV=1		15.6527	13	5	5	5	1	500	55.079	5.05	High	13.8144	5
FALSE		Master Protein	P43145	ADM OS=Rattus norvegicus GN=Adm PE=1 SV=1		15.6445	41.0811	5	5	5	1	185	20.624	10.81	High	14.3575	5
FALSE		Master Protein	P05370	Glucose-6-phosphate 1-dehydrogenase OS=Rattus norvegicus GN=G6pdx PE=1 SV=3		15.3416	16.1165	8	8	8	1	515	59.338	6.38	High	10.8126	8
FALSE		Master Protein	P68255	14-3-3 protein theta OS=Rattus norvegicus GN=Ywhaq PE=1 SV=1		15.3235	31.0204	6	6	4	1	245	27.761	4.78	High	13.8003	6
FALSE		Master Protein	P49744	Thrombospondin-4 OS=Rattus norvegicus GN=Thbs4 PE=1 SV=1		14.9995	7.34694	6	6	5	1	980	108.145	4.75	High	15.145	6
FALSE		Master Protein	P62804	Histone H4 OS=Rattus norvegicus GN=Hist1h4b PE=1 SV=2		14.8403	50.4854	5	7	5	1	103	11.36	11.36	High	16.8664	5
FALSE		Master Protein	P50398	Rab GDP dissociation inhibitor alpha OS=Rattus norvegicus GN=Gdi1 PE=1 SV=1		14.8182	13.6465	4	6	1	1	447	50.504	5.14	High	15.136	4
FALSE		Master Protein	P31720	Complement C1q subcomponent subunit A OS=Rattus norvegicus GN=C1qa PE=1 SV=2		14.7817	21.6327	4	4	4	1	245	25.901	8.97	High	14.6506	4
FALSE		Master Protein	P62161	Calmodulin OS=Rattus norvegicus GN=Calm1 PE=1 SV=2		14.7766	44.2953	4	6	4	1	149	16.827	4.22	High	15.5551	4
FALSE		Master Protein	Q62745	CD81 antigen OS=Rattus norvegicus GN=Cd81 PE=1 SV=1		14.6716	18.6441	3	5	3	1	236	25.871	5.52	High	18.9618	3
FALSE		Master Protein	Q6AYC4	Macrophage-capping protein OS=Rattus norvegicus GN=Capg PE=1 SV=1		14.5454	18.6246	5	6	5	1	349	38.775	6.55	High	16.8154	5
FALSE		Master Protein	Q6IG01	Keratin, type II cytoskeletal 1b OS=Rattus norvegicus GN=Krt77 PE=3 SV=1		14.1871	7.70713	5	9	1	1	519	57.22	5.64	High	27.6801	5
FALSE		Master Protein	P24368	Peptidyl-prolyl cis-trans isomerase B OS=Rattus norvegicus GN=Ppib PE=1 SV=3		13.9841	26.8519	5	5	5	1	216	23.788	9.5	High	14.0698	5
FALSE		Master Protein	P52296	Importin subunit beta-1 OS=Rattus norvegicus GN=Kpnb1 PE=1 SV=1		13.9438	6.17143	4	4	4	1	875	97.062	4.77	High	11.7859	4
FALSE		Master Protein	Q63081	Protein disulfide-isomerase A6 OS=Rattus norvegicus GN=Pdia6 PE=1 SV=2		13.8743	12.5	4	4	4	1	440	48.143	5.14	High	13.5732	4
FALSE		Master Protein	P14095	Growth-regulated alpha protein OS=Rattus norvegicus GN=Cxcl1 PE=1 SV=2		13.815	45.8333	3	6	3	1	96	10.242	9.19	High	13.925	3
FALSE		Master Protein	Q6AXR4	Beta-hexosaminidase subunit beta OS=Rattus norvegicus GN=Hexb PE=2 SV=1		13.5161	10.6145	5	5	5	1	537	61.488	7.94	High	12.9969	5
FALSE		Master Protein	P25304	Agrin OS=Rattus norvegicus GN=Agrn PE=1 SV=2		13.3666	4.44104	6	7	6	1	1959	208.509	6.15	High	16.3659	6
FALSE		Master Protein	P35213	14-3-3 protein beta/alpha OS=Rattus norvegicus GN=Ywhab PE=1 SV=3		13.1786	21.1382	4	5	2	1	246	28.037	4.88	High	11.965	4
FALSE		Master Protein	Q05982	Nucleoside diphosphate kinase A OS=Rattus norvegicus GN=Nme1 PE=1 SV=1		13.0628	34.8684	4	5	1	1	152	17.182	6.33	High	15.8385	4
FALSE		Master Protein	P07632	Superoxide dismutase [Cu-Zn] OS=Rattus norvegicus GN=Sod1 PE=1 SV=2		12.9495	24.6753	3	5	3	1	154	15.902	6.35	High	14.579	3
FALSE		Master Protein	Q641Z7	Acid sphingomyelinase-like phosphodiesterase 3a OS=Rattus norvegicus GN=Smpdl3a PE=2 SV=1		12.7559	16.8539	5	5	5	1	445	49.864	6.28	High	13.4682	5
FALSE		Master Protein	P20607	Interleukin-6 OS=Rattus norvegicus GN=Il6 PE=2 SV=1		12.6702	25.5924	5	5	5	1	211	24.342	8.05	High	11.7093	5
FALSE		Master Protein	P09606	Glutamine synthetase OS=Rattus norvegicus GN=Glul PE=1 SV=3		12.5134	22.5201	6	6	6	1	373	42.24	7.08	High	9.22489	6
FALSE		Master Protein	B0BNA5	Coactosin-like protein OS=Rattus norvegicus GN=Cotl1 PE=1 SV=1		12.4849	30.2817	5	6	5	1	142	15.922	5.4	High	13.3933	5
FALSE		Master Protein	P19945	60S acidic ribosomal protein P0 OS=Rattus norvegicus GN=Rplp0 PE=1 SV=2		12.4747	23.3438	5	5	5	1	317	34.194	6.25	High	14.8502	5
FALSE		Master Protein	P47942	Dihydropyrimidinase-related protein 2 OS=Rattus norvegicus GN=Dpysl2 PE=1 SV=1		12.3266	11.3636	5	5	5	1	572	62.239	6.38	High	13.3037	5
FALSE		Master Protein	Q6IG02	Keratin, type II cytoskeletal 2 epidermal OS=Rattus norvegicus GN=Krt2 PE=3 SV=1		12.2265	7.59124	5	6	3	1	685	69.085	7.69	High	15.7679	5
FALSE		Master Protein	P34901	Syndecan-4 OS=Rattus norvegicus GN=Sdc4 PE=1 SV=1		12.0373	18.8119	4	5	4	1	202	21.948	4.39	High	10.6878	4
FALSE		Master Protein	P28480	T-complex protein 1 subunit alpha OS=Rattus norvegicus GN=Tcp1 PE=1 SV=1		12.0313	10.4317	5	6	5	1	556	60.322	6.21	High	14.3423	5
FALSE		Master Protein	P30120	Metalloproteinase inhibitor 1 OS=Rattus norvegicus GN=Timp1 PE=1 SV=2		12.0135	24.424	4	4	4	1	217	23.778	8.09	High	12.2761	4
FALSE		Master Protein	Q9JHW0	Proteasome subunit beta type-7 OS=Rattus norvegicus GN=Psmb7 PE=1 SV=1		11.8578	18.4116	5	6	5	1	277	29.908	7.97	High	14.6081	5
FALSE		Master Protein	Q9JI92	Syntenin-1 OS=Rattus norvegicus GN=Sdcbp PE=1 SV=1		11.8488	20.3333	4	6	4	1	300	32.403	7.49	High	18.3115	4
FALSE		Master Protein	P80067	Dipeptidyl peptidase 1 OS=Rattus norvegicus GN=Ctsc PE=1 SV=3		11.8396	17.316	5	5	5	1	462	52.202	6.89	High	15.1327	5
FALSE		Master Protein	O88656	Actin-related protein 2/3 complex subunit 1B OS=Rattus norvegicus GN=Arpc1b PE=1 SV=3		11.8369	14.7849	4	5	4	1	372	41.03	8.35	High	14.1235	4
FALSE		Master Protein	P30348	C-X-C motif chemokine 2 OS=Rattus norvegicus GN=Cxcl2 PE=1 SV=1		11.7469	49	3	4	3	1	100	10.776	8.54	High	14.7693	3
FALSE		Master Protein	P85972	Vinculin OS=Rattus norvegicus GN=Vcl PE=1 SV=1		11.7389	5.06567	4	4	4	1	1066	116.542	6.09	High	11.1826	4
FALSE		Master Protein	O08628	Procollagen C-endopeptidase enhancer 1 OS=Rattus norvegicus GN=Pcolce PE=1 SV=1		11.5477	11.3248	3	4	3	1	468	50.153	8.06	High	13.2688	3
FALSE		Master Protein	P07151	Beta-2-microglobulin OS=Rattus norvegicus GN=B2m PE=1 SV=1		11.5025	11.7647	2	4	2	1	119	13.711	8	High	12.3283	2
FALSE		Master Protein	P28064	Proteasome subunit beta type-8 OS=Rattus norvegicus GN=Psmb8 PE=1 SV=3		11.4681	18.1159	4	4	4	1	276	30.55	7.42	High	13.2445	4
FALSE		Master Protein	Q6P502	T-complex protein 1 subunit gamma OS=Rattus norvegicus GN=Cct3 PE=1 SV=1		11.2418	8.62385	4	4	4	1	545	60.608	6.64	High	11.8157	4
FALSE		Master Protein	P46462	Transitional endoplasmic reticulum ATPase OS=Rattus norvegicus GN=Vcp PE=1 SV=3		11.173	8.18859	5	5	5	1	806	89.293	5.26	High	14.0076	5
FALSE		Master Protein	P45592	Cofilin-1 OS=Rattus norvegicus GN=Cfl1 PE=1 SV=3		10.7734	35.5422	4	4	4	1	166	18.521	8.09	High	13.6611	4
FALSE		Master Protein	P28073	Proteasome subunit beta type-6 OS=Rattus norvegicus GN=Psmb6 PE=1 SV=3		10.569	29.8319	4	4	4	1	238	25.273	5	High	10.5923	4
FALSE		Master Protein	P51886	Lumican OS=Rattus norvegicus GN=Lum PE=1 SV=1		10.4334	17.4556	5	6	5	1	338	38.255	6.43	High	14.3686	5
FALSE		Master Protein	Q80WY6	Tumor necrosis factor receptor superfamily member 1B OS=Rattus norvegicus GN=Tnfrsf1b PE=2 SV=1		10.3459	9.70464	4	4	4	1	474	50.116	6.68	High	12.0889	4
FALSE		Master Protein	P00507	Aspartate aminotransferase, mitochondrial OS=Rattus norvegicus GN=Got2 PE=1 SV=2		10.3231	13.4884	6	6	6	1	430	47.284	9	High	15.1797	6
FALSE		Master Protein	P63029	Translationally-controlled tumor protein OS=Rattus norvegicus GN=Tpt1 PE=1 SV=1		10.2665	15.6977	2	3	2	1	172	19.45	4.86	High	10.2817	2
FALSE		Master Protein	P38652	Phosphoglucomutase-1 OS=Rattus norvegicus GN=Pgm1 PE=1 SV=2		10.022	11.5658	5	5	5	1	562	61.365	6.76	High	10.6956	5
FALSE		Master Protein	P85970	Actin-related protein 2/3 complex subunit 2 OS=Rattus norvegicus GN=Arpc2 PE=1 SV=1		9.98809	20.6667	6	6	6	1	300	34.37	7.36	High	13.6194	6
FALSE		Master Protein	Q9R0D6	Transcobalamin-2 OS=Rattus norvegicus GN=Tcn2 PE=2 SV=1		9.83475	16.6276	5	5	5	1	427	47.39	7.74	High	11.2326	5
FALSE		Master Protein	P63245	Receptor of activated protein C kinase 1 OS=Rattus norvegicus GN=Rack1 PE=1 SV=3		9.63785	14.8265	4	4	4	1	317	35.055	7.69	High	10.4877	4
FALSE		Master Protein	P02770	Serum albumin OS=Rattus norvegicus GN=Alb PE=1 SV=2		9.61173	3.78289	2	3	2	1	608	68.686	6.48	High	9.57394	2
FALSE		Master Protein	P08699	Galectin-3 OS=Rattus norvegicus GN=Lgals3 PE=1 SV=4		9.59095	18.7023	4	5	4	1	262	27.184	8.57	High	13.5805	4
FALSE		Master Protein	P32038	Complement factor D OS=Rattus norvegicus GN=Cfd PE=1 SV=2		9.54483	15.5894	2	3	2	1	263	28.424	7.06	High	10.1819	2
FALSE		Master Protein	P29524	Plasminogen activator inhibitor 2 type A OS=Rattus norvegicus GN=Serpinb2 PE=2 SV=1		9.52563	14.1827	4	4	4	1	416	47.218	5.35	High	10.9006	4
FALSE		Master Protein	P10760	Adenosylhomocysteinase OS=Rattus norvegicus GN=Ahcy PE=1 SV=3		9.47838	11.5741	4	4	4	1	432	47.507	6.54	High	10.3044	4
FALSE		Master Protein	P35704	Peroxiredoxin-2 OS=Rattus norvegicus GN=Prdx2 PE=1 SV=3		9.41274	27.7778	5	5	5	1	198	21.77	5.59	High	7.93812	5
FALSE		Master Protein	Q32KJ6	N-acetylgalactosamine-6-sulfatase OS=Rattus norvegicus GN=Galns PE=1 SV=1		9.21682	8.39695	4	4	4	1	524	58.265	7.01	High	10.2811	4
FALSE		Master Protein	P02262	Histone H2A type 1 OS=Rattus norvegicus PE=1 SV=2		9.18001	21.5385	2	3	2	1	130	14.069	10.9	High	8.04042	2
FALSE		Master Protein	O08730	Glycogenin-1 OS=Rattus norvegicus GN=Gyg1 PE=2 SV=4		8.99691	12.6126	3	3	3	1	333	37.354	5.39	High	9.68868	3
FALSE		Master Protein	Q5Y4N8	Adhesion G protein-coupled receptor E2 OS=Rattus norvegicus GN=Adgre1 PE=2 SV=1		8.96241	3.21888	2	2	2	1	932	102.24	5.17	High	7.42875	2
FALSE		Master Protein	Q6IUU3	Sulfhydryl oxidase 1 OS=Rattus norvegicus GN=Qsox1 PE=1 SV=1		8.8519	6.93333	4	4	4	1	750	82.36	7.93	High	12.6027	4
FALSE		Master Protein	P13635	Ceruloplasmin OS=Rattus norvegicus GN=Cp PE=1 SV=3		8.82477	4.62701	4	4	4	1	1059	120.764	5.58	High	7.49552	4
FALSE		Master Protein	P11762	Galectin-1 OS=Rattus norvegicus GN=Lgals1 PE=1 SV=2		8.77359	43.7037	5	5	5	1	135	14.847	5.26	High	7.90678	5
FALSE		Master Protein	P04636	Malate dehydrogenase, mitochondrial OS=Rattus norvegicus GN=Mdh2 PE=1 SV=2		8.76828	15.3846	4	4	4	1	338	35.661	8.68	High	11.5851	4
FALSE		Master Protein	P49911	Acidic leucine-rich nuclear phosphoprotein 32 family member A OS=Rattus norvegicus GN=Anp32a PE=2 SV=1		8.74139	16.1943	3	3	3	1	247	28.547	4.08	High	9.25662	3
FALSE		Master Protein	P85845	Fascin OS=Rattus norvegicus GN=Fscn1 PE=1 SV=2		8.71482	10.142	3	3	3	1	493	54.457	6.74	High	10.1885	3
FALSE		Master Protein	Q63321	Procollagen-lysine,2-oxoglutarate 5-dioxygenase 1 OS=Rattus norvegicus GN=Plod1 PE=2 SV=1		8.56427	7.00549	4	4	4	1	728	83.559	6.8	High	10.1013	4
FALSE		Master Protein	Q5XFX0	Transgelin-2 OS=Rattus norvegicus GN=Tagln2 PE=1 SV=1		8.4028	27.6382	4	4	4	1	199	22.379	8.25	High	10.2445	4
FALSE		Master Protein	Q9JLT0	Myosin-10 OS=Rattus norvegicus GN=Myh10 PE=1 SV=1		8.40164	1.97368	3	3	1	1	1976	228.824	5.6	High	8.44257	3
FALSE		Master Protein	Q9EQS0	Transaldolase OS=Rattus norvegicus GN=Taldo1 PE=1 SV=2		8.39867	15.1335	5	5	5	1	337	37.436	7.03	High	11.189	5
FALSE		Master Protein	Q66HD0	Endoplasmin OS=Rattus norvegicus GN=Hsp90b1 PE=1 SV=2		8.36965	6.09453	4	4	3	1	804	92.713	4.81	High	11.0027	4
FALSE		Master Protein	Q02765	Cathepsin S OS=Rattus norvegicus GN=Ctss PE=2 SV=1		8.36495	9.39394	2	2	2	1	330	36.809	6.09	High	7.64474	2
FALSE		Master Protein	Q9R063	Peroxiredoxin-5, mitochondrial OS=Rattus norvegicus GN=Prdx5 PE=1 SV=1		8.25529	25.3521	4	4	4	1	213	22.165	8.66	High	10.7945	4
FALSE		Master Protein	Q5I0D1	Glyoxalase domain-containing protein 4 OS=Rattus norvegicus GN=Glod4 PE=1 SV=1		8.1186	14.094	3	3	3	1	298	33.246	5.27	High	7.68438	3
FALSE		Master Protein	P06760	Beta-glucuronidase OS=Rattus norvegicus GN=Gusb PE=2 SV=1		8.08919	9.25926	5	5	5	1	648	74.746	6.74	High	1.93168	5
FALSE		Master Protein	P61206	ADP-ribosylation factor 3 OS=Rattus norvegicus GN=Arf3 PE=2 SV=2		8.07432	31.4917	4	4	4	1	181	20.588	7.43	High	10.7722	4
FALSE		Master Protein	P09117	Fructose-bisphosphate aldolase C OS=Rattus norvegicus GN=Aldoc PE=1 SV=3		7.72052	14.0496	3	3	1	1	363	39.259	7.12	High	9.67576	3
FALSE		Master Protein	P10860	Glutamate dehydrogenase 1, mitochondrial OS=Rattus norvegicus GN=Glud1 PE=1 SV=2		7.54608	6.98925	3	3	3	1	558	61.377	8	High	8.72527	3
FALSE		Master Protein	P04906	Glutathione S-transferase P OS=Rattus norvegicus GN=Gstp1 PE=1 SV=2		7.31596	12.8571	2	2	2	1	210	23.424	7.36	High	7.17059	2
FALSE		Master Protein	P11232	Thioredoxin OS=Rattus norvegicus GN=Txn PE=1 SV=2		7.31532	35.2381	3	3	3	1	105	11.666	4.92	High	8.08662	3
FALSE		Master Protein	P20961	Plasminogen activator inhibitor 1 OS=Rattus norvegicus GN=Serpine1 PE=2 SV=1		7.29007	7.71144	3	3	3	1	402	44.981	6.64	High	6.15726	3
FALSE		Master Protein	Q91ZN1	Coronin-1A OS=Rattus norvegicus GN=Coro1a PE=1 SV=3		7.14564	5.63991	2	3	2	1	461	51.033	6.48	High	8.44589	2
FALSE		Master Protein	P18484	AP-2 complex subunit alpha-2 OS=Rattus norvegicus GN=Ap2a2 PE=1 SV=3		7.10445	4.58422	4	4	4	1	938	103.979	6.93	High	8.1829	4
FALSE		Master Protein	Q10746	C-X-C motif chemokine 3 OS=Rattus norvegicus GN=Cxcl3 PE=1 SV=2		7.09491	40.5941	2	3	2	1	101	11.102	9.17	High	10.0405	2
FALSE		Master Protein	P31044	Phosphatidylethanolamine-binding protein 1 OS=Rattus norvegicus GN=Pebp1 PE=1 SV=3		7.01329	26.2032	3	3	3	1	187	20.788	5.8	High	9.53206	3
FALSE		Master Protein	P08592	Amyloid beta A4 protein OS=Rattus norvegicus GN=App PE=1 SV=2		6.99546	6.1039	4	4	4	1	770	86.649	4.81	High	6.71029	4
FALSE		Master Protein	P08649	Complement C4 OS=Rattus norvegicus GN=C4 PE=1 SV=3		6.98997	1.49683	3	5	3	1	1737	192.042	7.33	High	5.90325	3
FALSE		Master Protein	Q63945	Protein SET OS=Rattus norvegicus GN=Set PE=2 SV=2		6.98	13.4948	3	3	3	1	289	33.386	4.32	High	8.11371	3
FALSE		Master Protein	P68511	14-3-3 protein eta OS=Rattus norvegicus GN=Ywhah PE=1 SV=2		6.93678	12.6016	3	3	2	1	246	28.194	4.89	High	5.90399	3
FALSE		Master Protein	Q8CFN2	Cell division control protein 42 homolog OS=Rattus norvegicus GN=Cdc42 PE=1 SV=2		6.87892	17.801	3	3	3	1	191	21.245	6.55	High	6.04546	3
FALSE		Master Protein	Q9QZQ5	Protein NOV homolog OS=Rattus norvegicus GN=Nov PE=1 SV=1		6.86866	8.26211	2	2	2	1	351	38.483	7.64	High	5.80134	2
FALSE		Master Protein	P20059	Hemopexin OS=Rattus norvegicus GN=Hpx PE=1 SV=3		6.70005	6.73913	3	6	3	1	460	51.318	7.65	High	10.9764	3
FALSE		Master Protein	Q5RKI1	Eukaryotic initiation factor 4A-II OS=Rattus norvegicus GN=Eif4a2 PE=1 SV=1		6.6798	7.12531	2	2	2	1	407	46.373	5.48	High	6.37702	2
FALSE		Master Protein	P14668	Annexin A5 OS=Rattus norvegicus GN=Anxa5 PE=1 SV=3		6.58795	7.83699	2	2	2	1	319	35.722	5.05	High	5.44732	2
FALSE		Master Protein	P0DMW1	Heat shock 70 kDa protein 1B OS=Rattus norvegicus GN=Hspa1b PE=2 SV=1		6.45201	3.90016	2	2	1	1	641	70.142	5.82	High	6.41581	2
FALSE		Master Protein	Q6B345	Protein S100-A11 OS=Rattus norvegicus GN=S100a11 PE=3 SV=1		6.41096	27.551	2	2	2	1	98	11.057	5.9	High	5.47662	2
FALSE		Master Protein	Q641X3	Beta-hexosaminidase subunit alpha OS=Rattus norvegicus GN=Hexa PE=2 SV=1		6.38495	5.30303	3	3	3	1	528	60.499	7.24	High	4.64283	3
FALSE		Master Protein	Q3MIE4	Synaptic vesicle membrane protein VAT-1 homolog OS=Rattus norvegicus GN=Vat1 PE=1 SV=1		6.3363	5.94059	2	2	2	1	404	43.091	6.62	High	6.47785	2
FALSE		Master Protein	P15800	Laminin subunit beta-2 OS=Rattus norvegicus GN=Lamb2 PE=1 SV=1		6.24548	1.49917	3	3	3	1	1801	196.347	6.79	High	6.94098	3
FALSE		Master Protein	A7VJC2	Heterogeneous nuclear ribonucleoproteins A2/B1 OS=Rattus norvegicus GN=Hnrnpa2b1 PE=1 SV=1		5.97397	10.4816	3	3	2	1	353	37.455	8.95	High	4.58782	3
FALSE		Master Protein	Q01177	Plasminogen OS=Rattus norvegicus GN=Plg PE=2 SV=2		5.94128	3.07882	2	2	2	1	812	90.477	7.08	High	6.96396	2
FALSE		Master Protein	P02091	Hemoglobin subunit beta-1 OS=Rattus norvegicus GN=Hbb PE=1 SV=3		5.83038	12.9252	2	3	2	1	147	15.969	8.07	High	7.27991	2
FALSE		Master Protein	Q6IG04	Keratin, type II cytoskeletal 72 OS=Rattus norvegicus GN=Krt72 PE=3 SV=2		5.78058	5.38462	3	4	1	1	520	56.816	7.36	High	9.38021	3
FALSE		Master Protein	P62909	40S ribosomal protein S3 OS=Rattus norvegicus GN=Rps3 PE=1 SV=1		5.71886	9.0535	2	2	2	1	243	26.657	9.66	High	6.24107	2
FALSE		Master Protein	Q6MG61	Chloride intracellular channel protein 1 OS=Rattus norvegicus GN=Clic1 PE=1 SV=1		5.64835	11.2033	2	2	2	1	241	26.964	5.17	High	6.12584	2
FALSE		Master Protein	A2RUV9	Adipocyte enhancer-binding protein 1 OS=Rattus norvegicus GN=Aebp1 PE=2 SV=1		5.6377	2.48227	2	2	2	1	1128	127.981	5.2	High	5.46301	2
FALSE		Master Protein	P61983	14-3-3 protein gamma OS=Rattus norvegicus GN=Ywhag PE=1 SV=2		5.62125	11.7409	2	2	1	1	247	28.285	4.89	High	5.731	2
FALSE		Master Protein	P70623	Fatty acid-binding protein, adipocyte OS=Rattus norvegicus GN=Fabp4 PE=1 SV=3		5.58782	27.2727	3	3	3	1	132	14.699	7.94	High	5.18106	3
FALSE		Master Protein	P62982	Ubiquitin-40S ribosomal protein S27a OS=Rattus norvegicus GN=Rps27a PE=1 SV=2		5.58126	23.7179	4	5	4	1	156	17.939	9.64	High	6.57983	4
FALSE		Master Protein	Q9JI85	Nucleobindin-2 OS=Rattus norvegicus GN=Nucb2 PE=1 SV=1		5.55965	4.7619	2	3	2	1	420	50.059	5.11	High	5.00684	2
FALSE		Master Protein	P30152	Neutrophil gelatinase-associated lipocalin OS=Rattus norvegicus GN=Lcn2 PE=1 SV=2		5.49856	11.1111	2	2	2	1	198	22.461	7.83	High	5.63477	2
FALSE		Master Protein	P38983	40S ribosomal protein SA OS=Rattus norvegicus GN=Rpsa PE=1 SV=3		5.46747	9.15254	2	2	2	1	295	32.803	4.87	High	6.11633	2
FALSE		Master Protein	Q6P7S1	Acid ceramidase OS=Rattus norvegicus GN=Asah1 PE=2 SV=1		5.46386	7.61421	3	3	3	1	394	44.415	8.31	High	7.74165	3
FALSE		Master Protein	O35567	Bifunctional purine biosynthesis protein PURH OS=Rattus norvegicus GN=Atic PE=1 SV=2		5.37045	8.9527	4	4	4	1	592	64.168	7.14	High	8.66209	4
FALSE		Master Protein	Q63663	Guanylate-binding protein 1 OS=Rattus norvegicus GN=Gbp2 PE=1 SV=2		5.34389	4.24448	2	2	2	1	589	67.067	5.69	High	5.2249	2
FALSE		Master Protein	Q63347	26S protease regulatory subunit 7 OS=Rattus norvegicus GN=Psmc2 PE=1 SV=3		5.33027	5.31178	2	2	2	1	433	48.544	5.8	High	5.33316	2
FALSE		Master Protein	P62703	40S ribosomal protein S4, X isoform OS=Rattus norvegicus GN=Rps4x PE=2 SV=2		5.31415	10.2662	3	3	3	1	263	29.579	10.15	High	6.7293	3
FALSE		Master Protein	Q9QZK5	Serine protease HTRA1 OS=Rattus norvegicus GN=Htra1 PE=2 SV=1		5.30662	7.08333	3	3	3	1	480	51.298	7.65	High	5.42574	3
FALSE		Master Protein	B2GUZ5	F-actin-capping protein subunit alpha-1 OS=Rattus norvegicus GN=Capza1 PE=1 SV=1		5.29743	13.986	3	3	2	1	286	32.889	5.69	High	7.40499	3
FALSE		Master Protein	Q68FR6	Elongation factor 1-gamma OS=Rattus norvegicus GN=Eef1g PE=2 SV=3		5.28535	3.66133	2	3	2	1	437	50.029	6.74	High	4.2925	2
FALSE		Master Protein	Q6IFX1	Keratin, type I cytoskeletal 24 OS=Rattus norvegicus GN=Krt24 PE=3 SV=1		5.25236	4.68432	2	3	1	1	491	52.347	5.01	High	7.72685	2
FALSE		Master Protein	P35289	Ras-related protein Rab-15 OS=Rattus norvegicus GN=Rab15 PE=2 SV=1		5.21607	10.3774	2	2	2	1	212	24.268	5.52	High	5.28611	2
FALSE		Master Protein	P28077	Proteasome subunit beta type-9 OS=Rattus norvegicus GN=Psmb9 PE=1 SV=2		5.21602	14.1553	2	2	2	1	219	23.31	5.01	High	6.79468	2
FALSE		Master Protein	P10111	Peptidyl-prolyl cis-trans isomerase A OS=Rattus norvegicus GN=Ppia PE=1 SV=2		5.15164	14.0244	2	2	2	1	164	17.863	8.16	High	4.8867	2
FALSE		Master Protein	P55053	Fatty acid-binding protein, epidermal OS=Rattus norvegicus GN=Fabp5 PE=1 SV=3		5.1357	20	2	2	2	1	135	15.05	7.18	High	6.35786	2
FALSE		Master Protein	Q8CHN8	Mannan-binding lectin serine protease 1 OS=Rattus norvegicus GN=Masp1 PE=1 SV=2		5.11648	3.69318	2	2	2	1	704	80.046	5.69	High	5.52427	2
FALSE		Master Protein	Q63041	Alpha-1-macroglobulin OS=Rattus norvegicus GN=A1m PE=1 SV=1		5.10614	1.33333	2	2	2	1	1500	167.019	6.9	High	5.42566	2
FALSE		Master Protein	Q63598	Plastin-3 OS=Rattus norvegicus GN=Pls3 PE=1 SV=2		5.09258	3.1746	2	2	2	1	630	70.635	5.48	High	5.07026	2
FALSE		Master Protein	P00689	Pancreatic alpha-amylase OS=Rattus norvegicus GN=Amy2 PE=2 SV=2		5.0749	4.33071	2	3	2	1	508	57.141	8.07	High	7.81803	2
FALSE		Master Protein	P07092	Glia-derived nexin OS=Rattus norvegicus GN=Serpine2 PE=1 SV=1		5.07397	6.04534	2	2	2	1	397	44.035	9.69	High	5.18652	2
FALSE		Master Protein	Q4FZT9	26S proteasome non-ATPase regulatory subunit 2 OS=Rattus norvegicus GN=Psmd2 PE=1 SV=1		5.02939	3.52423	3	3	3	1	908	100.124	5.2	High	4.81229	3
FALSE		Master Protein	P62271	40S ribosomal protein S18 OS=Rattus norvegicus GN=Rps18 PE=1 SV=3		5.02416	16.4474	3	3	3	1	152	17.708	10.99	High	4.71206	3
FALSE		Master Protein	P38650	Cytoplasmic dynein 1 heavy chain 1 OS=Rattus norvegicus GN=Dync1h1 PE=1 SV=1		5.00374	0.689061	3	3	3	1	4644	531.916	6.46	High	3.08681	3
FALSE		Master Protein	P14046	Alpha-1-inhibitor 3 OS=Rattus norvegicus GN=A1i3 PE=1 SV=1		4.91007	1.55721	2	2	1	1	1477	163.67	6.04	High	5.70691	2
FALSE		Master Protein	Q9EQV9	Carboxypeptidase B2 OS=Rattus norvegicus GN=Cpb2 PE=2 SV=1		4.63231	8.05687	2	2	2	1	422	48.796	8.41	High	5.68704	2
FALSE		Master Protein	Q5XIM9	T-complex protein 1 subunit beta OS=Rattus norvegicus GN=Cct2 PE=1 SV=3		4.51603	7.85047	3	3	3	1	535	57.422	6.46	High	5.74535	3
FALSE		Master Protein	P15978	Class I histocompatibility antigen, Non-RT1.A alpha-1 chain OS=Rattus norvegicus GN=RT1-Aw2 PE=1 SV=1		4.49852	6.26959	2	2	2	1	319	36.547	5.12	High	2.54154	2
FALSE		Master Protein	P23514	Coatomer subunit beta OS=Rattus norvegicus GN=Copb1 PE=1 SV=1		4.49412	2.83316	2	2	2	1	953	106.943	5.96	High	5.76052	2
FALSE		Master Protein	Q810F4	Protein FAM3C OS=Rattus norvegicus GN=Fam3c PE=2 SV=1		4.45893	8.81057	2	2	2	1	227	24.698	8.29	High	5.08987	2
FALSE		Master Protein	D3ZHA0	Filamin-C OS=Rattus norvegicus GN=Flnc PE=1 SV=1		4.40142	0.623624	2	2	2	1	2726	290.804	5.9	High	4.69588	2
FALSE		Master Protein	P30009	Myristoylated alanine-rich C-kinase substrate OS=Rattus norvegicus GN=Marcks PE=1 SV=2		4.37431	13.9159	3	3	3	1	309	29.777	4.34	High	6.46495	3
FALSE		Master Protein	P16599	Tumor necrosis factor OS=Rattus norvegicus GN=Tnf PE=2 SV=1		4.36949	10.2128	2	2	2	1	235	25.789	5.24	High	5.18146	2
FALSE		Master Protein	P48679	Prelamin-A/C OS=Rattus norvegicus GN=Lmna PE=1 SV=1		4.36003	4.06015	2	2	2	1	665	74.279	6.98	High	5.76767	2
FALSE		Master Protein	P25086	Interleukin-1 receptor antagonist protein OS=Rattus norvegicus GN=Il1rn PE=2 SV=1		4.30191	14.6067	3	3	3	1	178	20.269	6.89	High	4.84962	3
FALSE		Master Protein	Q6P7C7	Transmembrane glycoprotein NMB OS=Rattus norvegicus GN=Gpnmb PE=2 SV=1		4.28215	5.76923	2	2	2	1	572	63.691	7.11	High	6.45859	2
FALSE		Master Protein	Q6P7Q4	Lactoylglutathione lyase OS=Rattus norvegicus GN=Glo1 PE=1 SV=3		4.24372	10.3261	2	2	2	1	184	20.806	5.31	High	5.01585	2
FALSE		Master Protein	Q3T1K5	F-actin-capping protein subunit alpha-2 OS=Rattus norvegicus GN=Capza2 PE=1 SV=1		4.20525	6.29371	2	2	1	1	286	32.947	5.85	High	4.83299	2
FALSE		Master Protein	Q4KLF8	Actin-related protein 2/3 complex subunit 5 OS=Rattus norvegicus GN=Arpc5 PE=1 SV=3		4.20396	16.5563	2	2	2	1	151	16.31	5.67	High	5.06015	2
FALSE		Master Protein	P13697	NADP-dependent malic enzyme OS=Rattus norvegicus GN=Me1 PE=1 SV=2		4.05995	4.8951	2	2	2	1	572	63.962	6.93	High	5.00767	2
FALSE		Master Protein	P27605	Hypoxanthine-guanine phosphoribosyltransferase OS=Rattus norvegicus GN=Hprt1 PE=1 SV=1		3.99569	10.0917	2	2	2	1	218	24.462	6.54	High	3.77463	2
FALSE		Master Protein	P06866	Haptoglobin OS=Rattus norvegicus GN=Hp PE=1 SV=3		3.99296	6.05187	2	2	2	1	347	38.539	6.54	High	4.45918	2
FALSE		Master Protein	P13383	Nucleolin OS=Rattus norvegicus GN=Ncl PE=1 SV=3		3.98855	2.6648	2	2	2	1	713	77.101	4.74	High	4.5659	2
FALSE		Master Protein	O54715	V-type proton ATPase subunit S1 OS=Rattus norvegicus GN=Atp6ap1 PE=2 SV=1		3.97679	5.39957	2	2	2	1	463	51.09	5.52	High	4.77078	2
FALSE		Master Protein	P03957	Stromelysin-1 OS=Rattus norvegicus GN=Mmp3 PE=1 SV=1		3.79181	4.84211	3	3	3	1	475	53.394	5.63	High	5.34922	3
FALSE		Master Protein	P61589	Transforming protein RhoA OS=Rattus norvegicus GN=Rhoa PE=1 SV=1		3.73972	10.3627	2	2	2	1	193	21.768	6.1	High	4.06697	2
FALSE		Master Protein	Q4QQW8	Putative phospholipase B-like 2 OS=Rattus norvegicus GN=Plbd2 PE=1 SV=2		3.69503	3.24786	2	2	2	1	585	65.414	6.7	High	3.0444	2
FALSE		Master Protein	O88600	Heat shock 70 kDa protein 4 OS=Rattus norvegicus GN=Hspa4 PE=1 SV=1		3.68559	3.33333	2	2	2	1	840	93.997	5.21	High	3.70865	2
FALSE		Master Protein	P40241	CD9 antigen OS=Rattus norvegicus GN=Cd9 PE=1 SV=2		3.6168	8.84956	2	2	2	1	226	25.198	7.27	High	5.17818	2
FALSE		Master Protein	P53534	Glycogen phosphorylase, brain form (Fragment) OS=Rattus norvegicus GN=Pygb PE=1 SV=3		3.60629	2.50597	2	2	1	1	838	96.113	6.68	High	2.54339	2
FALSE		Master Protein	P00786	Pro-cathepsin H OS=Rattus norvegicus GN=Ctsh PE=1 SV=1		3.60455	7.50751	2	2	2	1	333	37.08	8.41	High	4.72369	2
FALSE		Master Protein	O35509	Ras-related protein Rab-11B OS=Rattus norvegicus GN=Rab11b PE=1 SV=4		3.59107	10.0917	2	2	2	1	218	24.473	5.94	High	5.0489	2
FALSE		Master Protein	P14480	Fibrinogen beta chain OS=Rattus norvegicus GN=Fgb PE=1 SV=4		3.56311	3.34029	2	2	2	1	479	54.201	7.78	High	4.55679	2
FALSE		Master Protein	Q66HG3	Beta-Ala-His dipeptidase OS=Rattus norvegicus GN=Cndp1 PE=1 SV=1		3.474	6.30081	3	3	3	1	492	54.893	5.21	High	0	3
FALSE		Master Protein	Q920A6	Retinoid-inducible serine carboxypeptidase OS=Rattus norvegicus GN=Scpep1 PE=2 SV=1		3.43882	6.85841	2	2	2	1	452	51.142	5.53	High	4.59721	2
FALSE		Master Protein	P14562	Lysosome-associated membrane glycoprotein 1 OS=Rattus norvegicus GN=Lamp1 PE=1 SV=1		3.43195	5.89681	2	2	2	1	407	43.941	8.07	High	2.56051	2
FALSE		Master Protein	P14669	Annexin A3 OS=Rattus norvegicus GN=Anxa3 PE=1 SV=4		3.39889	5.55556	2	2	2	1	324	36.341	6.35	High	3.8823	2
FALSE		Master Protein	P05942	Protein S100-A4 OS=Rattus norvegicus GN=S100a4 PE=2 SV=1		3.38424	16.8317	2	2	2	1	101	11.769	5.12	High	4.62526	2
FALSE		Master Protein	P04904	Glutathione S-transferase alpha-3 OS=Rattus norvegicus GN=Gsta3 PE=1 SV=3		3.28854	10.4072	3	3	3	1	221	25.303	8.75	High	3.9725	3
FALSE		Master Protein	P09811	Glycogen phosphorylase, liver form OS=Rattus norvegicus GN=Pygl PE=1 SV=5		3.2741	2.11765	2	2	1	1	850	97.421	7.2	High	2.23494	2
FALSE		Master Protein	P84245	Histone H3.3 OS=Rattus norvegicus GN=H3f3b PE=1 SV=2		3.16127	11.7647	2	2	2	1	136	15.319	11.27	High	2.02655	2
FALSE		Master Protein	Q5XI32	F-actin-capping protein subunit beta OS=Rattus norvegicus GN=Capzb PE=1 SV=1		3.12578	6.25	2	2	2	1	272	30.609	6	High	2.28115	2
FALSE		Master Protein	Q63621	Interleukin-1 receptor accessory protein OS=Rattus norvegicus GN=Il1rap PE=2 SV=1		3.05937	3.33333	2	2	2	1	570	65.556	7.72	High	2.49263	2
FALSE		Master Protein	P55067	Neurocan core protein OS=Rattus norvegicus GN=Ncan PE=1 SV=1		2.96165	3.97772	3	3	3	1	1257	135.46	5.52	High	1.76175	3
FALSE		Master Protein	Q63797	Proteasome activator complex subunit 1 OS=Rattus norvegicus GN=Psme1 PE=2 SV=1		2.95019	7.22892	2	2	2	1	249	28.559	6.02	High	4.24405	2
FALSE		Master Protein	P05964	Protein S100-A6 OS=Rattus norvegicus GN=S100a6 PE=1 SV=3		2.93734	16.8539	2	2	2	1	89	10.028	5.48	High	2.24527	2
FALSE		Master Protein	P17164	Tissue alpha-L-fucosidase OS=Rattus norvegicus GN=Fuca1 PE=1 SV=1		2.93251	3.8961	2	2	2	1	462	53.452	6.24	High	4.55651	2
FALSE		Master Protein	P35859	Insulin-like growth factor-binding protein complex acid labile subunit OS=Rattus norvegicus GN=Igfals PE=1 SV=1		2.83626	2.32172	2	2	2	1	603	66.77	6.52	High	0	2
FALSE		Master Protein	P62961	Nuclease-sensitive element-binding protein 1 OS=Rattus norvegicus GN=Ybx1 PE=2 SV=3		2.83323	11.8012	2	2	2	1	322	35.709	9.88	High	2.39957	2
FALSE		Master Protein	P52925	High mobility group protein B2 OS=Rattus norvegicus GN=Hmgb2 PE=2 SV=2		2.81257	10.4762	2	2	2	1	210	24.144	7.39	High	4.44901	2
FALSE		Master Protein	Q9EQX9	Ubiquitin-conjugating enzyme E2 N OS=Rattus norvegicus GN=Ube2n PE=1 SV=1		2.80733	14.4737	2	2	2	1	152	17.113	6.57	High	2.55446	2
FALSE		Master Protein	P04256	Heterogeneous nuclear ribonucleoprotein A1 OS=Rattus norvegicus GN=Hnrnpa1 PE=1 SV=3		2.73322	5.625	2	2	1	1	320	34.191	9.14	High	4.04986	2
FALSE		Master Protein	Q5U300	Ubiquitin-like modifier-activating enzyme 1 OS=Rattus norvegicus GN=Uba1 PE=1 SV=1		2.67671	1.89036	2	2	2	1	1058	117.713	5.57	High	1.67219	2
FALSE		Master Protein	P97536	Cullin-associated NEDD8-dissociated protein 1 OS=Rattus norvegicus GN=Cand1 PE=1 SV=1		2.6626	2.03252	2	2	2	1	1230	136.275	5.78	High	4.13436	2
FALSE		Master Protein	P62853	40S ribosomal protein S25 OS=Rattus norvegicus GN=Rps25 PE=2 SV=1		2.48208	12.8	2	2	2	1	125	13.734	10.11	High	3.50419	2
FALSE		Master Protein	Q63270	Cytoplasmic aconitate hydratase OS=Rattus norvegicus GN=Aco1 PE=1 SV=1		2.45134	2.47469	2	2	2	1	889	98.065	7.15	High	3.4122	2
FALSE		Master Protein	Q63798	Proteasome activator complex subunit 2 OS=Rattus norvegicus GN=Psme2 PE=2 SV=3		2.3408	9.66387	2	2	2	1	238	26.84	5.72	High	4.56956	2
FALSE		Master Protein	P08460	Nidogen-1 (Fragment) OS=Rattus norvegicus GN=Nid1 PE=1 SV=2		2.04133	4.93827	2	2	2	1	324	35.639	4.74	High	1.85824	2
FALSE		Master Protein	P14844	C-C motif chemokine 2 OS=Rattus norvegicus GN=Ccl2 PE=2 SV=1		1.99137	14.1892	2	2	2	1	148	16.449	9	High	3.39176	2
FALSE		Master Protein	P24090	Alpha-2-HS-glycoprotein OS=Rattus norvegicus GN=Ahsg PE=1 SV=2		1.97686	3.69318	2	2	2	1	352	37.958	6.51	High	2.05418	2
FALSE		Master Protein	P01946	Hemoglobin subunit alpha-1/2 OS=Rattus norvegicus GN=Hba1 PE=1 SV=3		1.88178	6.33803	2	2	2	1	142	15.319	7.97	High	4.72778	2
FALSE		Master Protein	Q66H12	Alpha-N-acetylgalactosaminidase OS=Rattus norvegicus GN=Naga PE=2 SV=1		1.80702	6.74699	2	2	2	1	415	46.84	5.86	High	4.32088	2
FALSE		Master Protein	Q63569	26S protease regulatory subunit 6A OS=Rattus norvegicus GN=Psmc3 PE=2 SV=1		1.8037	7.0615	2	2	2	1	439	49.129	5.24	High	4.65139	2
FALSE		Master Protein	P23593	Apolipoprotein D OS=Rattus norvegicus GN=Apod PE=1 SV=1		1.52695	6.87831	2	2	2	1	189	21.621	5.02	High	1.66845	2
