# Supplementary material for: The Brain Origin of Neonatal Microglia Determines the Content of Exosomes and Biological Function
Source: Preprints.org preprint supplement (doi:10.20944/preprints201907.0102.v1), 2019-07-08
Supplement: Supplementary file 15 [file Supplementary data 7.xlsx]

## Sheet: Proteins
Checked	Protein FDR Confidence	Master	Accession	Description	Exp. q-value	Sum PEP Score	Coverage	# Peptides	# PSMs	# Unique Peptides	# Protein Groups	# AAs	MW [kDa]	calc. pI	Found in Sample: [S1] F1: Sample	Score Sequest HT	# Peptides Sequest HT
FALSE		Master Protein	P04937	Fibronectin OS=Rattus norvegicus GN=Fn1 PE=1 SV=2		121.809	26.0396	41	49	41	1	2477	272.341	5.76	High	131.502	41
FALSE		Master Protein	P60711	Actin, cytoplasmic 1 OS=Rattus norvegicus GN=Actb PE=1 SV=1		90.7907	56.8	17	33	7	1	375	41.71	5.48	High	102.877	17
FALSE		Master Protein	P04764	Alpha-enolase OS=Rattus norvegicus GN=Eno1 PE=1 SV=4		77.1422	64.2857	18	29	15	1	434	47.098	6.57	High	90.2585	18
FALSE		Master Protein	Q6IFW6	Keratin, type I cytoskeletal 10 OS=Rattus norvegicus GN=Krt10 PE=3 SV=1		64.9645	27.1863	17	44	13	1	526	56.47	5.15	High	102.103	17
FALSE		Master Protein	P85973	Purine nucleoside phosphorylase OS=Rattus norvegicus GN=Pnp PE=1 SV=1		58.8871	65.7439	14	22	14	1	289	32.281	6.93	High	67.4528	14
FALSE		Master Protein	P01026	Complement C3 OS=Rattus norvegicus GN=C3 PE=1 SV=3		54.4571	15.7547	19	21	19	1	1663	186.342	6.54	High	51.5117	19
FALSE		Master Protein	Q6P6V0	Glucose-6-phosphate isomerase OS=Rattus norvegicus GN=Gpi PE=1 SV=1		53.2246	38.172	15	22	15	1	558	62.787	7.77	High	59.6594	15
FALSE		Master Protein	P02793	Ferritin light chain 1 OS=Rattus norvegicus GN=Ftl1 PE=1 SV=3		52.735	68.8525	9	16	9	1	183	20.736	6.43	High	52.0665	9
FALSE		Master Protein	Q9QXQ0	Alpha-actinin-4 OS=Rattus norvegicus GN=Actn4 PE=1 SV=2		48.7432	30.955	21	22	14	1	911	104.849	5.44	High	55.1119	21
FALSE		Master Protein	P48500	Triosephosphate isomerase OS=Rattus norvegicus GN=Tpi1 PE=1 SV=2		48.0784	70.6827	12	17	12	1	249	26.832	7.24	High	51.5672	12
FALSE		Master Protein	P02650	Apolipoprotein E OS=Rattus norvegicus GN=Apoe PE=1 SV=2		47.8851	37.8205	14	19	14	1	312	35.731	5.27	High	44.4623	14
FALSE		Master Protein	P00787	Cathepsin B OS=Rattus norvegicus GN=Ctsb PE=1 SV=2		47.6134	41.2979	12	18	12	1	339	37.446	5.6	High	46.7175	12
FALSE		Master Protein	Q6P6Q2	Keratin, type II cytoskeletal 5 OS=Rattus norvegicus GN=Krt5 PE=1 SV=1		46.3555	22.7431	19	37	10	1	576	61.788	7.8	High	80.5546	19
FALSE		Master Protein	Q6P0K8	Junction plakoglobin OS=Rattus norvegicus GN=Jup PE=1 SV=1		45.8528	26.8456	16	20	16	1	745	81.749	6.14	High	48.0263	16
FALSE		Master Protein	Q6IFV1	Keratin, type I cytoskeletal 14 OS=Rattus norvegicus GN=Krt14 PE=2 SV=1		44.9277	21.2371	12	30	4	1	485	52.651	5.16	High	56.0796	12
FALSE		Master Protein	P17220	Proteasome subunit alpha type-2 OS=Rattus norvegicus GN=Psma2 PE=1 SV=3		44.0204	43.1624	7	13	7	1	234	25.91	7.43	High	48.366	7
FALSE		Master Protein	Q6IFU7	Keratin, type I cytoskeletal 42 OS=Rattus norvegicus GN=Krt42 PE=3 SV=1		43.0939	27.2124	17	23	6	1	452	50.182	5.16	High	51.8543	17
FALSE		Master Protein	Q68FS4	Cytosol aminopeptidase OS=Rattus norvegicus GN=Lap3 PE=1 SV=1		42.966	52.4085	19	22	19	1	519	56.115	7.21	High	57.372	19
FALSE		Master Protein	P60901	Proteasome subunit alpha type-6 OS=Rattus norvegicus GN=Psma6 PE=1 SV=1		41.1171	52.8455	13	15	13	1	246	27.382	6.76	High	45.151	13
FALSE		Master Protein	P13941	Collagen alpha-1(III) chain OS=Rattus norvegicus GN=Col3a1 PE=2 SV=3		39.3248	23.8551	21	22	21	1	1463	138.851	6.52	High	59.6035	21
FALSE		Master Protein	P02454	Collagen alpha-1(I) chain OS=Rattus norvegicus GN=Col1a1 PE=1 SV=5		37.5414	14.797	14	14	14	1	1453	137.869	5.92	High	41.5535	14
FALSE		Master Protein	Q5I0D7	Xaa-Pro dipeptidase OS=Rattus norvegicus GN=Pepd PE=2 SV=1		37.0028	28.0488	11	13	11	1	492	54.715	5.95	High	39.6812	11
FALSE		Master Protein	P11598	Protein disulfide-isomerase A3 OS=Rattus norvegicus GN=Pdia3 PE=1 SV=2		35.8454	36.2376	15	16	15	1	505	56.588	6.21	High	36.9519	15
FALSE		Master Protein	P21670	Proteasome subunit alpha type-4 OS=Rattus norvegicus GN=Psma4 PE=1 SV=1		33.414	47.1264	9	14	9	1	261	29.479	7.72	High	40.7323	9
FALSE		Master Protein	O35763	Moesin OS=Rattus norvegicus GN=Msn PE=1 SV=3		33.3564	30.8492	16	18	16	1	577	67.697	6.54	High	40.2937	16
FALSE		Master Protein	P18418	Calreticulin OS=Rattus norvegicus GN=Calr PE=1 SV=1		33.344	37.0192	10	12	10	1	416	47.966	4.49	High	33.4709	10
FALSE		Master Protein	P50137	Transketolase OS=Rattus norvegicus GN=Tkt PE=1 SV=1		32.9868	23.114	9	10	9	1	623	67.601	7.49	High	33.9165	9
FALSE		Master Protein	P18420	Proteasome subunit alpha type-1 OS=Rattus norvegicus GN=Psma1 PE=1 SV=2		32.3139	51.3308	10	13	10	1	263	29.499	6.61	High	34.3854	10
FALSE		Master Protein	P63018	Heat shock cognate 71 kDa protein OS=Rattus norvegicus GN=Hspa8 PE=1 SV=1		31.5544	19.8142	10	14	8	1	646	70.827	5.52	High	36.3859	10
FALSE		Master Protein	P04642	L-lactate dehydrogenase A chain OS=Rattus norvegicus GN=Ldha PE=1 SV=1		30.1662	36.747	12	14	10	1	332	36.427	8.27	High	33.4506	12
FALSE		Master Protein	Q6IFU8	Keratin, type I cytoskeletal 17 OS=Rattus norvegicus GN=Krt17 PE=1 SV=1		30.0699	21.4781	14	18	5	1	433	48.093	5.02	High	34.3727	14
FALSE		Master Protein	P63102	14-3-3 protein zeta/delta OS=Rattus norvegicus GN=Ywhaz PE=1 SV=1		29.3006	42.8571	8	10	6	1	245	27.754	4.79	High	32.279	8
FALSE		Master Protein	P10960	Prosaposin OS=Rattus norvegicus GN=Psap PE=1 SV=1		28.9368	25.4513	14	15	14	1	554	61.084	5.25	High	28.6492	14
FALSE		Master Protein	P48004	Proteasome subunit alpha type-7 OS=Rattus norvegicus GN=Psma7 PE=1 SV=1		28.6008	42.126	9	13	9	1	254	28.309	8.68	High	37.6038	9
FALSE		Master Protein	P68035	Actin, alpha cardiac muscle 1 OS=Rattus norvegicus GN=Actc1 PE=2 SV=1		27.9566	29.9735	11	16	1	1	377	41.992	5.39	High	37.2217	11
FALSE		Master Protein	P18422	Proteasome subunit alpha type-3 OS=Rattus norvegicus GN=Psma3 PE=1 SV=3		27.7772	27.451	8	14	8	1	255	28.401	5.44	High	34.5938	8
FALSE		Master Protein	Q62667	Major vault protein OS=Rattus norvegicus GN=Mvp PE=1 SV=4		27.7662	21.2544	14	15	14	1	861	95.739	5.58	High	30.6283	14
FALSE		Master Protein	P05065	Fructose-bisphosphate aldolase A OS=Rattus norvegicus GN=Aldoa PE=1 SV=2		27.7622	33.5165	10	13	10	1	364	39.327	8.09	High	28.5071	10
FALSE		Master Protein	P28075	Proteasome subunit beta type-5 OS=Rattus norvegicus GN=Psmb5 PE=1 SV=3		27.0345	48.6692	11	13	11	1	263	28.567	7.02	High	30.5904	11
FALSE		Master Protein	P06238	Alpha-2-macroglobulin OS=Rattus norvegicus GN=A2m PE=2 SV=2		26.4366	7.6087	9	13	9	1	1472	163.682	6.29	High	29.412	9
FALSE		Master Protein	P50399	Rab GDP dissociation inhibitor beta OS=Rattus norvegicus GN=Gdi2 PE=1 SV=2		26.2655	31.9101	11	11	8	1	445	50.505	6.25	High	22.437	11
FALSE		Master Protein	Q6IG05	Keratin, type II cytoskeletal 75 OS=Rattus norvegicus GN=Krt75 PE=3 SV=2		25.4348	18.8192	12	20	2	1	542	58.991	8.07	High	41.7425	12
FALSE		Master Protein	P18421	Proteasome subunit beta type-1 OS=Rattus norvegicus GN=Psmb1 PE=1 SV=3		25.2683	43.3333	9	11	9	1	240	26.462	7.36	High	24.6969	9
FALSE		Master Protein	P51635	Alcohol dehydrogenase [NADP(+)] OS=Rattus norvegicus GN=Akr1a1 PE=1 SV=2		25.081	40	11	11	11	1	325	36.483	7.31	High	28.1463	11
FALSE		Master Protein	P34067	Proteasome subunit beta type-4 OS=Rattus norvegicus GN=Psmb4 PE=1 SV=2		25.0713	31.1787	6	10	6	1	263	29.178	6.92	High	28.2299	6
FALSE		Master Protein	P06761	78 kDa glucose-regulated protein OS=Rattus norvegicus GN=Hspa5 PE=1 SV=1		25.0464	20.7951	11	12	9	1	654	72.302	5.16	High	27.2796	11
FALSE		Master Protein	P06302	Prothymosin alpha OS=Rattus norvegicus GN=Ptma PE=1 SV=2		24.6706	22.3214	5	7	5	1	112	12.375	3.84	High	23.6286	5
FALSE		Master Protein	P05197	Elongation factor 2 OS=Rattus norvegicus GN=Eef2 PE=1 SV=4		23.9132	17.4825	11	11	11	1	858	95.223	6.83	High	26.8191	11
FALSE		Master Protein	Q6IMF3	Keratin, type II cytoskeletal 1 OS=Rattus norvegicus GN=Krt1 PE=2 SV=1		23.5995	9.28	9	21	6	1	625	64.791	7.87	High	49.5945	9
FALSE		Master Protein	P24268	Cathepsin D OS=Rattus norvegicus GN=Ctsd PE=1 SV=1		23.1989	27.2727	10	13	10	1	407	44.652	7.09	High	24.6223	10
FALSE		Master Protein	P19132	Ferritin heavy chain OS=Rattus norvegicus GN=Fth1 PE=1 SV=3		23.1414	46.1538	8	11	8	1	182	21.113	6.3	High	18.748	8
FALSE		Master Protein	P62963	Profilin-1 OS=Rattus norvegicus GN=Pfn1 PE=1 SV=2		22.6074	65.7143	7	8	7	1	140	14.948	8.28	High	23.7427	7
FALSE		Master Protein	P07323	Gamma-enolase OS=Rattus norvegicus GN=Eno2 PE=1 SV=2		21.8893	21.4286	6	7	3	1	434	47.111	5.16	High	25.4363	6
FALSE		Master Protein	P34064	Proteasome subunit alpha type-5 OS=Rattus norvegicus GN=Psma5 PE=1 SV=1		21.7433	33.61	5	7	5	1	241	26.374	4.86	High	24.5378	5
FALSE		Master Protein	Q6IG01	Keratin, type II cytoskeletal 1b OS=Rattus norvegicus GN=Krt77 PE=3 SV=1		21.149	13.6802	8	18	3	1	519	57.22	5.64	High	40.1642	8
FALSE		Master Protein	P42123	L-lactate dehydrogenase B chain OS=Rattus norvegicus GN=Ldhb PE=1 SV=2		20.9138	25.4491	8	9	6	1	334	36.589	6.05	High	17.243	8
FALSE		Master Protein	P23785	Granulins OS=Rattus norvegicus GN=Grn PE=1 SV=3		20.5322	12.7551	6	9	6	1	588	63.325	6.47	High	17.8338	6
FALSE		Master Protein	P12346	Serotransferrin OS=Rattus norvegicus GN=Tf PE=1 SV=3		20.2617	10.1719	8	9	8	1	698	76.346	7.28	High	20.9675	8
FALSE		Master Protein	P07895	Superoxide dismutase [Mn], mitochondrial OS=Rattus norvegicus GN=Sod2 PE=1 SV=2		20.0208	23.4234	5	9	5	1	222	24.659	8.81	High	27.4596	5
FALSE		Master Protein	Q4KM35	Proteasome subunit beta type-10 OS=Rattus norvegicus GN=Psmb10 PE=2 SV=1		19.9813	26.3736	5	6	5	1	273	29.02	6.64	High	20.3311	5
FALSE		Master Protein	Q9Z1P2	Alpha-actinin-1 OS=Rattus norvegicus GN=Actn1 PE=1 SV=1		19.7762	10.7623	8	9	1	1	892	102.896	5.38	High	19.6945	8
FALSE		Master Protein	P00507	Aspartate aminotransferase, mitochondrial OS=Rattus norvegicus GN=Got2 PE=1 SV=2		19.6808	20.9302	7	7	7	1	430	47.284	9	High	18.8743	7
FALSE		Master Protein	P34058	Heat shock protein HSP 90-beta OS=Rattus norvegicus GN=Hsp90ab1 PE=1 SV=4		19.6481	14.0884	9	9	2	1	724	83.229	5.03	High	22.0154	9
FALSE		Master Protein	Q6IFV4	Keratin, type I cytoskeletal 13 OS=Rattus norvegicus GN=Krt13 PE=3 SV=1		19.5653	12.1005	8	14	2	1	438	47.699	4.91	High	31.5555	8
FALSE		Master Protein	P40307	Proteasome subunit beta type-2 OS=Rattus norvegicus GN=Psmb2 PE=1 SV=1		18.9968	47.7612	9	12	9	1	201	22.898	7.44	High	26.7465	9
FALSE		Master Protein	Q4FZU2	Keratin, type II cytoskeletal 6A OS=Rattus norvegicus GN=Krt6a PE=1 SV=1		18.78	12.3188	8	15	2	1	552	59.213	7.94	High	35.8037	8
FALSE		Master Protein	P11980	Pyruvate kinase PKM OS=Rattus norvegicus GN=Pkm PE=1 SV=3		18.737	19.774	7	7	7	1	531	57.781	7.06	High	21.6641	7
FALSE		Master Protein	P82995	Heat shock protein HSP 90-alpha OS=Rattus norvegicus GN=Hsp90aa1 PE=1 SV=3		18.3299	12.2783	8	8	2	1	733	84.762	5.01	High	19.9819	8
FALSE		Master Protein	P70645	Bleomycin hydrolase OS=Rattus norvegicus GN=Blmh PE=1 SV=1		18.2788	23.5683	7	7	7	1	454	52.289	6.48	High	20.4539	7
FALSE		Master Protein	P40112	Proteasome subunit beta type-3 OS=Rattus norvegicus GN=Psmb3 PE=1 SV=1		18.0344	34.1463	5	6	5	1	205	22.949	6.55	High	19.8433	5
FALSE		Master Protein	Q63610	Tropomyosin alpha-3 chain OS=Rattus norvegicus GN=Tpm3 PE=1 SV=2		17.9938	27.0161	8	8	5	1	248	28.989	4.78	High	23.7254	8
FALSE		Master Protein	P62260	14-3-3 protein epsilon OS=Rattus norvegicus GN=Ywhae PE=1 SV=1		17.6821	19.6078	4	6	3	1	255	29.155	4.74	High	18.4119	4
FALSE		Master Protein	P28064	Proteasome subunit beta type-8 OS=Rattus norvegicus GN=Psmb8 PE=1 SV=3		17.5615	26.8116	5	7	5	1	276	30.55	7.42	High	20.0674	5
FALSE		Master Protein	P80067	Dipeptidyl peptidase 1 OS=Rattus norvegicus GN=Ctsc PE=1 SV=3		17.5568	23.5931	6	6	6	1	462	52.202	6.89	High	17.8149	6
FALSE		Master Protein	P09495	Tropomyosin alpha-4 chain OS=Rattus norvegicus GN=Tpm4 PE=1 SV=3		17.4706	29.0323	9	9	6	1	248	28.492	4.69	High	19.8543	9
FALSE		Master Protein	Q9EPB1	Dipeptidyl peptidase 2 OS=Rattus norvegicus GN=Dpp7 PE=1 SV=1		17.3609	19.6	6	7	6	1	500	55.079	5.05	High	20.2419	6
FALSE		Master Protein	P19804	Nucleoside diphosphate kinase B OS=Rattus norvegicus GN=Nme2 PE=1 SV=1		17.2678	42.7632	5	7	2	1	152	17.272	7.44	High	20.3589	5
FALSE		Master Protein	P46462	Transitional endoplasmic reticulum ATPase OS=Rattus norvegicus GN=Vcp PE=1 SV=3		17.006	12.9032	8	8	8	1	806	89.293	5.26	High	20.6079	8
FALSE		Master Protein	P16975	SPARC OS=Rattus norvegicus GN=Sparc PE=1 SV=4		16.5304	23.9203	6	8	6	1	301	34.274	4.89	High	19.979	6
FALSE		Master Protein	Q6IG02	Keratin, type II cytoskeletal 2 epidermal OS=Rattus norvegicus GN=Krt2 PE=3 SV=1		16.4673	8.90511	8	11	3	1	685	69.085	7.69	High	22.9365	8
FALSE		Master Protein	B0BNA5	Coactosin-like protein OS=Rattus norvegicus GN=Cotl1 PE=1 SV=1		16.36	41.5493	5	6	5	1	142	15.922	5.4	High	15.5616	5
FALSE		Master Protein	P04785	Protein disulfide-isomerase OS=Rattus norvegicus GN=P4hb PE=1 SV=2		16.2172	13.9489	6	6	6	1	509	56.916	4.93	High	16.1349	6
FALSE		Master Protein	Q68FP1	Gelsolin OS=Rattus norvegicus GN=Gsn PE=1 SV=1		15.8898	11.0256	6	6	6	1	780	86.014	6.09	High	18.9856	6
FALSE		Master Protein	Q9EQS0	Transaldolase OS=Rattus norvegicus GN=Taldo1 PE=1 SV=2		15.8638	21.9585	7	7	7	1	337	37.436	7.03	High	13.4942	7
FALSE		Master Protein	Q10758	Keratin, type II cytoskeletal 8 OS=Rattus norvegicus GN=Krt8 PE=1 SV=3		15.842	10.9731	7	20	1	1	483	53.985	6	High	41.2907	7
FALSE		Master Protein	P04906	Glutathione S-transferase P OS=Rattus norvegicus GN=Gstp1 PE=1 SV=2		15.7818	29.5238	4	5	4	1	210	23.424	7.36	High	17.8519	4
FALSE		Master Protein	P68370	Tubulin alpha-1A chain OS=Rattus norvegicus GN=Tuba1a PE=1 SV=1		15.6399	16.1863	5	5	5	1	451	50.104	5.06	High	15.0734	5
FALSE		Master Protein	Q6IG00	Keratin, type II cytoskeletal 4 OS=Rattus norvegicus GN=Krt4 PE=3 SV=1		15.114	9.88806	9	12	1	1	536	57.631	7.64	High	22.227	9
FALSE		Master Protein	Q6AYC4	Macrophage-capping protein OS=Rattus norvegicus GN=Capg PE=1 SV=1		14.8818	24.3553	6	8	6	1	349	38.775	6.55	High	14.372	6
FALSE		Master Protein	P30349	Leukotriene A-4 hydrolase OS=Rattus norvegicus GN=Lta4h PE=2 SV=2		14.7134	14.2623	7	7	7	1	610	69.132	6.04	High	15.372	7
FALSE		Master Protein	P07154	Cathepsin L1 OS=Rattus norvegicus GN=Ctsl PE=1 SV=2		14.6993	23.9521	6	6	6	1	334	37.636	6.83	High	13.17	6
FALSE		Master Protein	Q5XI73	Rho GDP-dissociation inhibitor 1 OS=Rattus norvegicus GN=Arhgdia PE=1 SV=1		14.5402	32.8431	4	5	4	1	204	23.393	5.2	High	15.7923	4
FALSE		Master Protein	Q63691	Monocyte differentiation antigen CD14 OS=Rattus norvegicus GN=Cd14 PE=2 SV=2		14.3566	12.0968	4	4	4	1	372	40.029	5.52	High	13.7979	4
FALSE		Master Protein	P10111	Peptidyl-prolyl cis-trans isomerase A OS=Rattus norvegicus GN=Ppia PE=1 SV=2		14.3355	46.9512	6	8	6	1	164	17.863	8.16	High	19.1792	6
FALSE		Master Protein	Q00715	Histone H2B type 1 OS=Rattus norvegicus PE=1 SV=2		14.1939	19.2	2	4	2	1	125	13.982	10.36	High	13.4101	2
FALSE		Master Protein	P09606	Glutamine synthetase OS=Rattus norvegicus GN=Glul PE=1 SV=3		14.1906	20.1072	6	6	6	1	373	42.24	7.08	High	12.4673	6
FALSE		Master Protein	O70513	Galectin-3-binding protein OS=Rattus norvegicus GN=Lgals3bp PE=1 SV=2		13.9659	10.9756	5	5	5	1	574	63.701	5.35	High	13.7941	5
FALSE		Master Protein	Q62632	Follistatin-related protein 1 OS=Rattus norvegicus GN=Fstl1 PE=1 SV=1		13.8218	15.3595	4	8	4	1	306	34.6	5.99	High	6.09236	4
FALSE		Master Protein	Q9R1T3	Cathepsin Z OS=Rattus norvegicus GN=Ctsz PE=1 SV=2		13.3334	20.5882	6	7	6	1	306	34.172	7.15	High	14.2937	6
FALSE		Master Protein	P04636	Malate dehydrogenase, mitochondrial OS=Rattus norvegicus GN=Mdh2 PE=1 SV=2		13.2391	21.5976	6	6	6	1	338	35.661	8.68	High	16.691	6
FALSE		Master Protein	Q05982	Nucleoside diphosphate kinase A OS=Rattus norvegicus GN=Nme1 PE=1 SV=1		13.132	34.8684	4	6	1	1	152	17.182	6.33	High	18.0625	4
FALSE		Master Protein	P62161	Calmodulin OS=Rattus norvegicus GN=Calm1 PE=1 SV=2		13.0947	29.5302	3	5	3	1	149	16.827	4.22	High	16.1115	3
FALSE		Master Protein	P47853	Biglycan OS=Rattus norvegicus GN=Bgn PE=1 SV=1		12.958	20.3252	6	6	6	1	369	41.68	7.52	High	15.308	6
FALSE		Master Protein	P10860	Glutamate dehydrogenase 1, mitochondrial OS=Rattus norvegicus GN=Glud1 PE=1 SV=2		12.915	16.129	8	8	8	1	558	61.377	8	High	14.0915	8
FALSE		Master Protein	Q9R063	Peroxiredoxin-5, mitochondrial OS=Rattus norvegicus GN=Prdx5 PE=1 SV=1		12.4738	24.8826	5	5	5	1	213	22.165	8.66	High	14.2646	5
FALSE		Master Protein	P62630	Elongation factor 1-alpha 1 OS=Rattus norvegicus GN=Eef1a1 PE=2 SV=1		12.4552	15.1515	5	6	5	1	462	50.082	9.01	High	13.963	5
FALSE		Master Protein	P31721	Complement C1q subcomponent subunit B OS=Rattus norvegicus GN=C1qb PE=1 SV=2		12.4101	15.8103	3	4	3	1	253	26.573	9	High	13.0832	3
FALSE		Master Protein	Q6Q0N1	Cytosolic non-specific dipeptidase OS=Rattus norvegicus GN=Cndp2 PE=1 SV=1		12.3931	14.3158	5	6	5	1	475	52.66	5.66	High	12.7764	5
FALSE		Master Protein	O89049	Thioredoxin reductase 1, cytoplasmic OS=Rattus norvegicus GN=Txnrd1 PE=1 SV=5		12.2264	15.0301	6	7	6	1	499	54.637	6.47	High	11.6241	6
FALSE		Master Protein	Q07936	Annexin A2 OS=Rattus norvegicus GN=Anxa2 PE=1 SV=2		12.1417	14.7493	4	4	4	1	339	38.654	7.69	High	12.3731	4
FALSE		Master Protein	O88989	Malate dehydrogenase, cytoplasmic OS=Rattus norvegicus GN=Mdh1 PE=1 SV=3		12.0198	19.1617	4	4	4	1	334	36.46	6.58	High	12.7573	4
FALSE		Master Protein	P08721	Osteopontin OS=Rattus norvegicus GN=Spp1 PE=1 SV=2		11.6625	24.9211	6	6	6	1	317	34.942	4.53	High	13.2094	6
FALSE		Master Protein	Q9JHW0	Proteasome subunit beta type-7 OS=Rattus norvegicus GN=Psmb7 PE=1 SV=1		11.4388	28.1588	6	6	6	1	277	29.908	7.97	High	16.0906	6
FALSE		Master Protein	P07335	Creatine kinase B-type OS=Rattus norvegicus GN=Ckb PE=1 SV=2		11.4134	13.6483	4	4	4	1	381	42.698	5.67	High	11.1492	4
FALSE		Master Protein	P31722	Complement C1q subcomponent subunit C OS=Rattus norvegicus GN=C1qc PE=1 SV=2		11.0063	16.3265	3	4	3	1	245	25.67	8.32	High	8.63329	3
FALSE		Master Protein	P16617	Phosphoglycerate kinase 1 OS=Rattus norvegicus GN=Pgk1 PE=1 SV=2		11.0047	19.4245	5	5	5	1	417	44.51	7.9	High	11.4592	5
FALSE		Master Protein	P04797	Glyceraldehyde-3-phosphate dehydrogenase OS=Rattus norvegicus GN=Gapdh PE=1 SV=3		10.9292	20.1201	5	6	5	1	333	35.805	8.03	High	13.0506	5
FALSE		Master Protein	P28073	Proteasome subunit beta type-6 OS=Rattus norvegicus GN=Psmb6 PE=1 SV=3		10.9105	30.2521	4	4	4	1	238	25.273	5	High	10.411	4
FALSE		Master Protein	Q32KJ6	N-acetylgalactosamine-6-sulfatase OS=Rattus norvegicus GN=Galns PE=1 SV=1		10.5414	12.2137	5	5	5	1	524	58.265	7.01	High	11.1765	5
FALSE		Master Protein	P00697	Lysozyme C-1 OS=Rattus norvegicus GN=Lyz1 PE=1 SV=2		10.5097	17.5676	2	3	2	1	148	16.718	9.1	High	10.7394	2
FALSE		Master Protein	P50398	Rab GDP dissociation inhibitor alpha OS=Rattus norvegicus GN=Gdi1 PE=1 SV=1		10.2807	11.8568	4	4	1	1	447	50.504	5.14	High	8.16036	4
FALSE		Master Protein	P25113	Phosphoglycerate mutase 1 OS=Rattus norvegicus GN=Pgam1 PE=1 SV=4		9.96283	25.1969	4	5	4	1	254	28.814	7.18	High	10.9962	4
FALSE		Master Protein	P85108	Tubulin beta-2A chain OS=Rattus norvegicus GN=Tubb2a PE=1 SV=1		9.94188	16.6292	6	6	6	1	445	49.875	4.89	High	12.5801	6
FALSE		Master Protein	P38659	Protein disulfide-isomerase A4 OS=Rattus norvegicus GN=Pdia4 PE=1 SV=2		9.82861	14.3079	6	7	6	1	643	72.675	5.12	High	12.6099	6
FALSE		Master Protein	P62804	Histone H4 OS=Rattus norvegicus GN=Hist1h4b PE=1 SV=2		9.75232	50.4854	5	5	5	1	103	11.36	11.36	High	12.0828	5
FALSE		Master Protein	P24368	Peptidyl-prolyl cis-trans isomerase B OS=Rattus norvegicus GN=Ppib PE=1 SV=3		9.74469	20.3704	4	5	4	1	216	23.788	9.5	High	9.96261	4
FALSE		Master Protein	P31000	Vimentin OS=Rattus norvegicus GN=Vim PE=1 SV=2		9.73436	10.9442	5	5	5	1	466	53.7	5.12	High	10.0864	5
FALSE		Master Protein	P05371	Clusterin OS=Rattus norvegicus GN=Clu PE=1 SV=2		9.63944	11.8568	4	5	4	1	447	51.342	5.71	High	12.7476	4
FALSE		Master Protein	P31720	Complement C1q subcomponent subunit A OS=Rattus norvegicus GN=C1qa PE=1 SV=2		9.4479	16.7347	3	3	3	1	245	25.901	8.97	High	10.1647	3
FALSE		Master Protein	P13221	Aspartate aminotransferase, cytoplasmic OS=Rattus norvegicus GN=Got1 PE=1 SV=3		9.31156	13.5593	4	4	4	1	413	46.4	7.21	High	8.14546	4
FALSE		Master Protein	P85968	6-phosphogluconate dehydrogenase, decarboxylating OS=Rattus norvegicus GN=Pgd PE=1 SV=1		9.08935	8.28157	3	3	3	1	483	53.202	7.02	High	9.43149	3
FALSE		Master Protein	P02770	Serum albumin OS=Rattus norvegicus GN=Alb PE=1 SV=2		8.97626	3.45395	2	3	2	1	608	68.686	6.48	High	7.3783	2
FALSE		Master Protein	P63029	Translationally-controlled tumor protein OS=Rattus norvegicus GN=Tpt1 PE=1 SV=1		8.97367	15.6977	2	3	2	1	172	19.45	4.86	High	6.9322	2
FALSE		Master Protein	P68511	14-3-3 protein eta OS=Rattus norvegicus GN=Ywhah PE=1 SV=2		8.95629	20.7317	4	5	2	1	246	28.194	4.89	High	11.0486	4
FALSE		Master Protein	P68255	14-3-3 protein theta OS=Rattus norvegicus GN=Ywhaq PE=1 SV=1		8.91876	16.7347	4	5	1	1	245	27.761	4.78	High	10.2636	4
FALSE		Master Protein	Q6AXR4	Beta-hexosaminidase subunit beta OS=Rattus norvegicus GN=Hexb PE=2 SV=1		8.83238	7.07635	4	4	4	1	537	61.488	7.94	High	8.96014	4
FALSE		Master Protein	Q6P734	Plasma protease C1 inhibitor OS=Rattus norvegicus GN=Serping1 PE=2 SV=1		8.70204	8.53175	3	3	3	1	504	55.576	5.83	High	8.63897	3
FALSE		Master Protein	Q641Z7	Acid sphingomyelinase-like phosphodiesterase 3a OS=Rattus norvegicus GN=Smpdl3a PE=2 SV=1		8.64935	11.6854	3	3	3	1	445	49.864	6.28	High	9.37862	3
FALSE		Master Protein	Q9ERB4	Versican core protein (Fragments) OS=Rattus norvegicus GN=Vcan PE=2 SV=2		8.54771	1.38787	3	3	3	1	2738	299.821	4.58	High	8.82157	3
FALSE		Master Protein	P35213	14-3-3 protein beta/alpha OS=Rattus norvegicus GN=Ywhab PE=1 SV=3		8.48366	16.6667	4	6	1	1	246	28.037	4.88	High	7.34969	4
FALSE		Master Protein	P45592	Cofilin-1 OS=Rattus norvegicus GN=Cfl1 PE=1 SV=3		8.39583	37.3494	4	4	4	1	166	18.521	8.09	High	12.1012	4
FALSE		Master Protein	P48679	Prelamin-A/C OS=Rattus norvegicus GN=Lmna PE=1 SV=1		8.27656	8.42105	5	5	5	1	665	74.279	6.98	High	11.2201	5
FALSE		Master Protein	Q6IG12	Keratin, type II cytoskeletal 7 OS=Rattus norvegicus GN=Krt7 PE=3 SV=1		8.22785	7.87746	5	11	1	1	457	50.678	5.87	High	25.0817	5
FALSE		Master Protein	P28077	Proteasome subunit beta type-9 OS=Rattus norvegicus GN=Psmb9 PE=1 SV=2		7.9989	19.6347	3	3	3	1	219	23.31	5.01	High	10.4479	3
FALSE		Master Protein	P07632	Superoxide dismutase [Cu-Zn] OS=Rattus norvegicus GN=Sod1 PE=1 SV=2		7.96765	24.6753	3	4	3	1	154	15.902	6.35	High	10.5791	3
FALSE		Master Protein	P62982	Ubiquitin-40S ribosomal protein S27a OS=Rattus norvegicus GN=Rps27a PE=1 SV=2		7.81233	28.2051	4	5	4	1	156	17.939	9.64	High	12.7837	4
FALSE		Master Protein	P35444	Cartilage oligomeric matrix protein OS=Rattus norvegicus GN=Comp PE=1 SV=1		7.70857	5.69536	3	3	3	1	755	82.611	4.73	High	7.61957	3
FALSE		Master Protein	Q63716	Peroxiredoxin-1 OS=Rattus norvegicus GN=Prdx1 PE=1 SV=1		7.41809	36.6834	6	6	6	1	199	22.095	8.13	High	12.742	6
FALSE		Master Protein	P10719	ATP synthase subunit beta, mitochondrial OS=Rattus norvegicus GN=Atp5b PE=1 SV=2		7.28456	6.99433	3	3	3	1	529	56.318	5.34	High	8.0282	3
FALSE		Master Protein	Q63416	Inter-alpha-trypsin inhibitor heavy chain H3 OS=Rattus norvegicus GN=Itih3 PE=2 SV=1		7.12969	3.72041	3	4	3	1	887	99.036	6.25	High	6.63399	3
FALSE		Master Protein	P06760	Beta-glucuronidase OS=Rattus norvegicus GN=Gusb PE=2 SV=1		7.1143	10.4938	5	5	5	1	648	74.746	6.74	High	11.7269	5
FALSE		Master Protein	Q6P7C7	Transmembrane glycoprotein NMB OS=Rattus norvegicus GN=Gpnmb PE=2 SV=1		6.88661	4.72028	2	3	2	1	572	63.691	7.11	High	6.67436	2
FALSE		Master Protein	P61983	14-3-3 protein gamma OS=Rattus norvegicus GN=Ywhag PE=1 SV=2		6.70079	12.9555	3	4	1	1	247	28.285	4.89	High	7.98969	3
FALSE		Master Protein	Q5RKI0	WD repeat-containing protein 1 OS=Rattus norvegicus GN=Wdr1 PE=1 SV=3		6.62856	7.42574	3	3	3	1	606	66.14	6.62	High	5.72625	3
FALSE		Master Protein	Q3MIE4	Synaptic vesicle membrane protein VAT-1 homolog OS=Rattus norvegicus GN=Vat1 PE=1 SV=1		6.47482	7.42574	2	2	2	1	404	43.091	6.62	High	5.85065	2
FALSE		Master Protein	Q4V7C7	Actin-related protein 3 OS=Rattus norvegicus GN=Actr3 PE=1 SV=1		6.42578	7.6555	3	3	3	1	418	47.327	5.88	High	4.95618	3
FALSE		Master Protein	Q641X3	Beta-hexosaminidase subunit alpha OS=Rattus norvegicus GN=Hexa PE=2 SV=1		6.29504	6.25	3	3	3	1	528	60.499	7.24	High	5.17335	3
FALSE		Master Protein	Q02765	Cathepsin S OS=Rattus norvegicus GN=Ctss PE=2 SV=1		6.28247	15.1515	3	3	3	1	330	36.809	6.09	High	6.54357	3
FALSE		Master Protein	P02262	Histone H2A type 1 OS=Rattus norvegicus PE=1 SV=2		6.17205	26.9231	3	4	3	1	130	14.069	10.9	High	8.64241	3
FALSE		Master Protein	Q8VHF5	Citrate synthase, mitochondrial OS=Rattus norvegicus GN=Cs PE=1 SV=1		6.10785	5.79399	2	2	2	1	466	51.833	8.35	High	5.55332	2
FALSE		Master Protein	Q9WTT6	Guanine deaminase OS=Rattus norvegicus GN=Gda PE=1 SV=1		6.09832	7.26872	2	2	2	1	454	50.984	5.83	High	3.67434	2
FALSE		Master Protein	P50282	Matrix metalloproteinase-9 OS=Rattus norvegicus GN=Mmp9 PE=2 SV=1		6.02524	5.64972	3	3	3	1	708	78.561	6.07	High	7.1865	3
FALSE		Master Protein	P20961	Plasminogen activator inhibitor 1 OS=Rattus norvegicus GN=Serpine1 PE=2 SV=1		5.99893	5.47264	2	2	2	1	402	44.981	6.64	High	5.05668	2
FALSE		Master Protein	B5DFC9	Nidogen-2 OS=Rattus norvegicus GN=Nid2 PE=2 SV=1		5.96658	3.6533	3	3	3	1	1396	152.88	5.47	High	7.0935	3
FALSE		Master Protein	P18292	Prothrombin OS=Rattus norvegicus GN=F2 PE=1 SV=1		5.86622	6.32091	3	3	3	1	617	70.367	6.71	High	7.70015	3
FALSE		Master Protein	P02091	Hemoglobin subunit beta-1 OS=Rattus norvegicus GN=Hbb PE=1 SV=3		5.84654	12.9252	2	3	2	1	147	15.969	8.07	High	6.75786	2
FALSE		Master Protein	Q4QQW8	Putative phospholipase B-like 2 OS=Rattus norvegicus GN=Plbd2 PE=1 SV=2		5.7167	4.78632	3	3	3	1	585	65.414	6.7	High	2.7834	3
FALSE		Master Protein	P11232	Thioredoxin OS=Rattus norvegicus GN=Txn PE=1 SV=2		5.62342	26.6667	2	2	2	1	105	11.666	4.92	High	6.56415	2
FALSE		Master Protein	P62898	Cytochrome c, somatic OS=Rattus norvegicus GN=Cycs PE=1 SV=2		5.35517	18.0952	2	3	2	1	105	11.598	9.58	High	7.40579	2
FALSE		Master Protein	P30121	Metalloproteinase inhibitor 2 OS=Rattus norvegicus GN=Timp2 PE=1 SV=3		5.01883	23.1818	3	3	3	1	220	24.34	7.49	High	7.85878	3
FALSE		Master Protein	Q5I0D1	Glyoxalase domain-containing protein 4 OS=Rattus norvegicus GN=Glod4 PE=1 SV=1		5.01843	8.38926	2	2	2	1	298	33.246	5.27	High	5.04517	2
FALSE		Master Protein	P30009	Myristoylated alanine-rich C-kinase substrate OS=Rattus norvegicus GN=Marcks PE=1 SV=2		4.90156	12.6214	2	2	2	1	309	29.777	4.34	High	4.80099	2
FALSE		Master Protein	P27926	Hexokinase-3 OS=Rattus norvegicus GN=Hk3 PE=2 SV=1		4.88654	4.87013	3	3	3	1	924	100.189	5.48	High	5.45153	3
FALSE		Master Protein	P31044	Phosphatidylethanolamine-binding protein 1 OS=Rattus norvegicus GN=Pebp1 PE=1 SV=3		4.84421	14.4385	2	2	2	1	187	20.788	5.8	High	6.50361	2
FALSE		Master Protein	P07483	Fatty acid-binding protein, heart OS=Rattus norvegicus GN=Fabp3 PE=1 SV=2		4.83866	21.0526	3	3	3	1	133	14.766	6.33	High	4.53884	3
FALSE		Master Protein	Q6IFX1	Keratin, type I cytoskeletal 24 OS=Rattus norvegicus GN=Krt24 PE=3 SV=1		4.81383	4.68432	2	4	1	1	491	52.347	5.01	High	6.54024	2
FALSE		Master Protein	Q66HD0	Endoplasmin OS=Rattus norvegicus GN=Hsp90b1 PE=1 SV=2		4.60244	4.10448	3	3	2	1	804	92.713	4.81	High	5.35195	3
FALSE		Master Protein	P63245	Receptor of activated protein C kinase 1 OS=Rattus norvegicus GN=Rack1 PE=1 SV=3		4.47671	7.25552	2	2	2	1	317	35.055	7.69	High	4.99345	2
FALSE		Master Protein	Q5RKI1	Eukaryotic initiation factor 4A-II OS=Rattus norvegicus GN=Eif4a2 PE=1 SV=1		4.41105	7.12531	2	2	2	1	407	46.373	5.48	High	4.36601	2
FALSE		Master Protein	P35704	Peroxiredoxin-2 OS=Rattus norvegicus GN=Prdx2 PE=1 SV=3		4.30727	18.6869	3	3	3	1	198	21.77	5.59	High	4.96729	3
FALSE		Master Protein	Q4V898	RNA-binding motif protein, X chromosome OS=Rattus norvegicus GN=Rbmx PE=1 SV=1		4.29141	6.66667	2	2	2	1	390	42.232	10.05	High	5.99655	2
FALSE		Master Protein	Q63598	Plastin-3 OS=Rattus norvegicus GN=Pls3 PE=1 SV=2		4.21281	3.1746	2	2	2	1	630	70.635	5.48	High	3.13884	2
FALSE		Master Protein	Q920P6	Adenosine deaminase OS=Rattus norvegicus GN=Ada PE=1 SV=3		4.05948	6.81818	2	2	2	1	352	39.874	5.5	High	3.11675	2
FALSE		Master Protein	P38652	Phosphoglucomutase-1 OS=Rattus norvegicus GN=Pgm1 PE=1 SV=2		3.95117	3.73665	2	2	2	1	562	61.365	6.76	High	4.39219	2
FALSE		Master Protein	P05370	Glucose-6-phosphate 1-dehydrogenase OS=Rattus norvegicus GN=G6pdx PE=1 SV=3		3.94885	5.04854	3	3	3	1	515	59.338	6.38	High	1.87547	3
FALSE		Master Protein	A7VJC2	Heterogeneous nuclear ribonucleoproteins A2/B1 OS=Rattus norvegicus GN=Hnrnpa2b1 PE=1 SV=1		3.94136	6.23229	2	2	2	1	353	37.455	8.95	High	0	2
FALSE		Master Protein	Q63041	Alpha-1-macroglobulin OS=Rattus norvegicus GN=A1m PE=1 SV=1		3.90718	1.33333	2	2	2	1	1500	167.019	6.9	High	5.19948	2
FALSE		Master Protein	O55096	Dipeptidyl peptidase 3 OS=Rattus norvegicus GN=Dpp3 PE=1 SV=2		3.89273	4.06504	2	2	2	1	738	82.987	5.22	High	5.59914	2
FALSE		Master Protein	P20059	Hemopexin OS=Rattus norvegicus GN=Hpx PE=1 SV=3		3.77603	5	2	4	2	1	460	51.318	7.65	High	4.53914	2
FALSE		Master Protein	P11442	Clathrin heavy chain 1 OS=Rattus norvegicus GN=Cltc PE=1 SV=3		3.75627	1.91045	2	2	2	1	1675	191.477	5.72	High	5.70025	2
FALSE		Master Protein	Q9R0J8	Legumain OS=Rattus norvegicus GN=Lgmn PE=1 SV=1		3.71431	7.12644	2	2	2	1	435	49.434	6.58	High	6.09657	2
FALSE		Master Protein	P61206	ADP-ribosylation factor 3 OS=Rattus norvegicus GN=Arf3 PE=2 SV=2		3.70554	11.6022	2	2	2	1	181	20.588	7.43	High	4.26779	2
FALSE		Master Protein	P06866	Haptoglobin OS=Rattus norvegicus GN=Hp PE=1 SV=3		3.67222	6.05187	2	2	2	1	347	38.539	6.54	High	4.15281	2
FALSE		Master Protein	P85970	Actin-related protein 2/3 complex subunit 2 OS=Rattus norvegicus GN=Arpc2 PE=1 SV=1		3.67089	9.66667	3	3	3	1	300	34.37	7.36	High	6.14685	3
FALSE		Master Protein	P07151	Beta-2-microglobulin OS=Rattus norvegicus GN=B2m PE=1 SV=1		3.49814	19.3277	2	2	2	1	119	13.711	8	High	5.08735	2
FALSE		Master Protein	Q5FVH2	Phospholipase D3 OS=Rattus norvegicus GN=Pld3 PE=2 SV=1		3.4573	4.30328	2	2	2	1	488	54.364	6.52	High	5.12749	2
FALSE		Master Protein	P02466	Collagen alpha-2(I) chain OS=Rattus norvegicus GN=Col1a2 PE=1 SV=3		3.21878	1.74927	2	2	2	1	1372	129.486	9.33	High	5.16776	2
FALSE		Master Protein	Q6IMF1	Keratin, type II cytoskeletal 80 OS=Rattus norvegicus GN=Krt80 PE=3 SV=1		3.16641	4.20354	2	2	2	1	452	50.519	6.2	High	2.29174	2
FALSE		Master Protein	P70619	Glutathione reductase (Fragment) OS=Rattus norvegicus GN=Gsr PE=2 SV=2		3.16526	5.42453	2	2	2	1	424	46.272	7.94	High	5.00364	2
FALSE		Master Protein	P01041	Cystatin-B OS=Rattus norvegicus GN=Cstb PE=1 SV=1		3.12919	32.6531	2	2	2	1	98	11.189	6.3	High	2.28969	2
FALSE		Master Protein	Q63797	Proteasome activator complex subunit 1 OS=Rattus norvegicus GN=Psme1 PE=2 SV=1		3.09173	8.83534	2	2	2	1	249	28.559	6.02	High	4.34379	2
FALSE		Master Protein	Q7TMA5	Apolipoprotein B-100 OS=Rattus norvegicus GN=Apob PE=1 SV=1		3.08515	0.56926	2	2	2	1	4743	535.688	7.42	High	2.03731	2
FALSE		Master Protein	O35244	Peroxiredoxin-6 OS=Rattus norvegicus GN=Prdx6 PE=1 SV=3		2.95186	10.7143	2	2	2	1	224	24.803	5.94	High	0	2
FALSE		Master Protein	O88767	Protein DJ-1 OS=Rattus norvegicus GN=Park7 PE=1 SV=1		2.94838	12.1693	2	2	2	1	189	19.961	6.77	High	2.23733	2
FALSE		Master Protein	P20611	Lysosomal acid phosphatase OS=Rattus norvegicus GN=Acp2 PE=1 SV=1		2.92939	4.49173	2	2	2	1	423	48.288	6.64	High	1.78906	2
FALSE		Master Protein	Q6P7Q4	Lactoylglutathione lyase OS=Rattus norvegicus GN=Glo1 PE=1 SV=3		2.87655	9.23913	2	2	2	1	184	20.806	5.31	High	4.56447	2
FALSE		Master Protein	P19468	Glutamate--cysteine ligase catalytic subunit OS=Rattus norvegicus GN=Gclc PE=1 SV=2		2.36902	3.2967	2	2	2	1	637	72.573	5.63	High	2.78405	2
FALSE		Master Protein	P01946	Hemoglobin subunit alpha-1/2 OS=Rattus norvegicus GN=Hba1 PE=1 SV=3		2.34559	6.33803	2	2	2	1	142	15.319	7.97	High	4.30254	2
FALSE		Master Protein	P04041	Glutathione peroxidase 1 OS=Rattus norvegicus GN=Gpx1 PE=1 SV=4		2.33534	12.9353	2	2	2	1	201	22.292	7.87	High	2.77663	2
FALSE		Master Protein	P85972	Vinculin OS=Rattus norvegicus GN=Vcl PE=1 SV=1		2.31413	2.1576	2	2	2	1	1066	116.542	6.09	High	2.13663	2
FALSE		Master Protein	Q01177	Plasminogen OS=Rattus norvegicus GN=Plg PE=2 SV=2		2.3016	1.97044	2	2	2	1	812	90.477	7.08	High	4.13192	2
FALSE		Master Protein	P62329	Thymosin beta-4 OS=Rattus norvegicus GN=Tmsb4x PE=1 SV=2		2.20848	45.4545	2	2	2	1	44	5.05	5.06	High	2.12128	2
FALSE		Master Protein	P80254	D-dopachrome decarboxylase OS=Rattus norvegicus GN=Ddt PE=1 SV=3		2.16194	22.0339	2	2	2	1	118	13.125	6.54	High	2.13945	2
FALSE		Master Protein	P84245	Histone H3.3 OS=Rattus norvegicus GN=H3f3b PE=1 SV=2		2.13563	11.7647	2	2	2	1	136	15.319	11.27	High	0	2
