# Supplementary material for: The Brain Origin of Neonatal Microglia Determines the Content of Exosomes and Biological Function
Source: Preprints.org preprint supplement (doi:10.20944/preprints201907.0102.v1), 2019-07-08
Supplement: Supplementary file 16 [file Supplementary data 8.xlsx]

## Sheet: Proteins
Checked	Protein FDR Confidence	Master	Accession	Description	Exp. q-value	Sum PEP Score	Coverage	# Peptides	# PSMs	# Unique Peptides	# Protein Groups	# AAs	MW [kDa]	calc. pI	Found in Sample: [S1] F1: Sample	Score Sequest HT	# Peptides Sequest HT
FALSE		Master Protein	P04937	Fibronectin OS=Rattus norvegicus GN=Fn1 PE=1 SV=2		215.582	39.1603	60	81	60	1	2477	272.341	5.76	High	249.096	60
FALSE		Master Protein	P01026	Complement C3 OS=Rattus norvegicus GN=C3 PE=1 SV=3		142.377	38.2441	51	61	51	1	1663	186.342	6.54	High	160.197	51
FALSE		Master Protein	P60711	Actin, cytoplasmic 1 OS=Rattus norvegicus GN=Actb PE=1 SV=1		65.9016	54.6667	15	26	7	1	375	41.71	5.48	High	82.4888	15
FALSE		Master Protein	P06238	Alpha-2-macroglobulin OS=Rattus norvegicus GN=A2m PE=2 SV=2		58.8982	19.0897	21	26	21	1	1472	163.682	6.29	High	61.6116	21
FALSE		Master Protein	Q62667	Major vault protein OS=Rattus norvegicus GN=Mvp PE=1 SV=4		55.6757	34.0302	21	23	21	1	861	95.739	5.58	High	58.0216	21
FALSE		Master Protein	P02454	Collagen alpha-1(I) chain OS=Rattus norvegicus GN=Col1a1 PE=1 SV=5		53.8274	22.0234	22	24	22	1	1453	137.869	5.92	High	64.4813	22
FALSE		Master Protein	P04764	Alpha-enolase OS=Rattus norvegicus GN=Eno1 PE=1 SV=4		51.5302	51.6129	16	19	11	1	434	47.098	6.57	High	48.3263	16
FALSE		Master Protein	P00787	Cathepsin B OS=Rattus norvegicus GN=Ctsb PE=1 SV=2		50.6479	42.4779	11	18	11	1	339	37.446	5.6	High	53.8801	11
FALSE		Master Protein	P02650	Apolipoprotein E OS=Rattus norvegicus GN=Apoe PE=1 SV=2		45.633	36.5385	12	19	12	1	312	35.731	5.27	High	48.5505	12
FALSE		Master Protein	Q6P6Q2	Keratin, type II cytoskeletal 5 OS=Rattus norvegicus GN=Krt5 PE=1 SV=1		44.0075	24.3056	15	29	8	1	576	61.788	7.8	High	60.0538	15
FALSE		Master Protein	P48500	Triosephosphate isomerase OS=Rattus norvegicus GN=Tpi1 PE=1 SV=2		41.3959	67.4699	11	15	11	1	249	26.832	7.24	High	45.1944	11
FALSE		Master Protein	Q6IFW6	Keratin, type I cytoskeletal 10 OS=Rattus norvegicus GN=Krt10 PE=3 SV=1		40.8041	16.9202	12	20	11	1	526	56.47	5.15	High	65.4786	12
FALSE		Master Protein	Q6IFV1	Keratin, type I cytoskeletal 14 OS=Rattus norvegicus GN=Krt14 PE=2 SV=1		39.7403	20.4124	11	17	3	1	485	52.651	5.16	High	42.6688	11
FALSE		Master Protein	Q6P0K8	Junction plakoglobin OS=Rattus norvegicus GN=Jup PE=1 SV=1		39.1097	22.6846	13	15	13	1	745	81.749	6.14	High	41.4871	13
FALSE		Master Protein	P34058	Heat shock protein HSP 90-beta OS=Rattus norvegicus GN=Hsp90ab1 PE=1 SV=4		37.8057	28.7293	17	18	10	1	724	83.229	5.03	High	45.4181	17
FALSE		Master Protein	P11442	Clathrin heavy chain 1 OS=Rattus norvegicus GN=Cltc PE=1 SV=3		37.7572	13.9701	16	17	16	1	1675	191.477	5.72	High	40.1172	16
FALSE		Master Protein	P10960	Prosaposin OS=Rattus norvegicus GN=Psap PE=1 SV=1		36.8212	37.3646	17	19	17	1	554	61.084	5.25	High	44.5612	17
FALSE		Master Protein	Q6P6V0	Glucose-6-phosphate isomerase OS=Rattus norvegicus GN=Gpi PE=1 SV=1		36.1471	29.0323	10	13	10	1	558	62.787	7.77	High	40.7323	10
FALSE		Master Protein	Q9ERB4	Versican core protein (Fragments) OS=Rattus norvegicus GN=Vcan PE=2 SV=2		35.9045	4.96713	10	14	10	1	2738	299.821	4.58	High	32.6717	10
FALSE		Master Protein	O70513	Galectin-3-binding protein OS=Rattus norvegicus GN=Lgals3bp PE=1 SV=2		35.8683	23.8676	11	15	11	1	574	63.701	5.35	High	37.3791	11
FALSE		Master Protein	P63018	Heat shock cognate 71 kDa protein OS=Rattus norvegicus GN=Hspa8 PE=1 SV=1		35.3778	26.4706	12	13	9	1	646	70.827	5.52	High	37.5873	12
FALSE		Master Protein	P85973	Purine nucleoside phosphorylase OS=Rattus norvegicus GN=Pnp PE=1 SV=1		35.2142	51.5571	10	14	10	1	289	32.281	6.93	High	41.2236	10
FALSE		Master Protein	P60901	Proteasome subunit alpha type-6 OS=Rattus norvegicus GN=Psma6 PE=1 SV=1		34.9726	41.0569	9	11	9	1	246	27.382	6.76	High	34.1702	9
FALSE		Master Protein	P02793	Ferritin light chain 1 OS=Rattus norvegicus GN=Ftl1 PE=1 SV=3		34.1454	68.8525	9	13	9	1	183	20.736	6.43	High	35.325	9
FALSE		Master Protein	P02466	Collagen alpha-2(I) chain OS=Rattus norvegicus GN=Col1a2 PE=1 SV=3		33.6844	14.8688	12	12	12	1	1372	129.486	9.33	High	31.9582	12
FALSE		Master Protein	P47853	Biglycan OS=Rattus norvegicus GN=Bgn PE=1 SV=1		31.7383	27.3713	8	10	8	1	369	41.68	7.52	High	26.0789	8
FALSE		Master Protein	Q9QXQ0	Alpha-actinin-4 OS=Rattus norvegicus GN=Actn4 PE=1 SV=2		31.4031	15.3677	11	11	5	1	911	104.849	5.44	High	33.2934	11
FALSE		Master Protein	Q6P734	Plasma protease C1 inhibitor OS=Rattus norvegicus GN=Serping1 PE=2 SV=1		29.9901	26.5873	11	13	11	1	504	55.576	5.83	High	27.6108	11
FALSE		Master Protein	P68035	Actin, alpha cardiac muscle 1 OS=Rattus norvegicus GN=Actc1 PE=2 SV=1		29.9538	36.6048	11	16	3	1	377	41.992	5.39	High	42.0746	11
FALSE		Master Protein	P24268	Cathepsin D OS=Rattus norvegicus GN=Ctsd PE=1 SV=1		29.4323	37.5921	11	14	11	1	407	44.652	7.09	High	32.9814	11
FALSE		Master Protein	P23785	Granulins OS=Rattus norvegicus GN=Grn PE=1 SV=3		27.3441	21.0884	9	11	9	1	588	63.325	6.47	High	23.1362	9
FALSE		Master Protein	P63102	14-3-3 protein zeta/delta OS=Rattus norvegicus GN=Ywhaz PE=1 SV=1		26.5127	34.6939	6	8	5	1	245	27.754	4.79	High	25.7847	6
FALSE		Master Protein	Q6IFU8	Keratin, type I cytoskeletal 17 OS=Rattus norvegicus GN=Krt17 PE=1 SV=1		26.359	20.7852	13	15	4	1	433	48.093	5.02	High	28.5162	13
FALSE		Master Protein	P04642	L-lactate dehydrogenase A chain OS=Rattus norvegicus GN=Ldha PE=1 SV=1		26.2994	35.5422	11	12	10	1	332	36.427	8.27	High	24.1134	11
FALSE		Master Protein	P08721	Osteopontin OS=Rattus norvegicus GN=Spp1 PE=1 SV=2		26.1717	31.2303	7	9	7	1	317	34.942	4.53	High	28.2819	7
FALSE		Master Protein	P82995	Heat shock protein HSP 90-alpha OS=Rattus norvegicus GN=Hsp90aa1 PE=1 SV=3		26.1443	18.6903	12	13	6	1	733	84.762	5.01	High	33.8972	12
FALSE		Master Protein	Q63691	Monocyte differentiation antigen CD14 OS=Rattus norvegicus GN=Cd14 PE=2 SV=2		25.2674	28.4946	9	11	9	1	372	40.029	5.52	High	31.4529	9
FALSE		Master Protein	Q6P9V9	Tubulin alpha-1B chain OS=Rattus norvegicus GN=Tuba1b PE=1 SV=1		24.9364	29.7118	9	13	2	1	451	50.12	5.06	High	35.2282	9
FALSE		Master Protein	Q5XIF6	Tubulin alpha-4A chain OS=Rattus norvegicus GN=Tuba4a PE=1 SV=1		23.8927	30.1339	9	12	2	1	448	49.892	5.06	High	33.0495	9
FALSE		Master Protein	P50282	Matrix metalloproteinase-9 OS=Rattus norvegicus GN=Mmp9 PE=2 SV=1		23.88	18.7853	11	12	11	1	708	78.561	6.07	High	28.5215	11
FALSE		Master Protein	Q9Z1P2	Alpha-actinin-1 OS=Rattus norvegicus GN=Actn1 PE=1 SV=1		23.8593	12.8924	9	9	3	1	892	102.896	5.38	High	22.477	9
FALSE		Master Protein	Q6IFU7	Keratin, type I cytoskeletal 42 OS=Rattus norvegicus GN=Krt42 PE=3 SV=1		23.5743	22.5664	12	13	3	1	452	50.182	5.16	High	27.8947	12
FALSE		Master Protein	P05065	Fructose-bisphosphate aldolase A OS=Rattus norvegicus GN=Aldoa PE=1 SV=2		23.47	26.9231	7	10	7	1	364	39.327	8.09	High	22.3438	7
FALSE		Master Protein	O35763	Moesin OS=Rattus norvegicus GN=Msn PE=1 SV=3		23.1567	20.6239	11	11	11	1	577	67.697	6.54	High	23.7219	11
FALSE		Master Protein	P07154	Cathepsin L1 OS=Rattus norvegicus GN=Ctsl PE=1 SV=2		22.4426	32.3353	8	9	8	1	334	37.636	6.83	High	27.3608	8
FALSE		Master Protein	P15429	Beta-enolase OS=Rattus norvegicus GN=Eno3 PE=1 SV=3		22.3789	23.5023	7	8	2	1	434	46.984	7.44	High	21.6575	7
FALSE		Master Protein	P34064	Proteasome subunit alpha type-5 OS=Rattus norvegicus GN=Psma5 PE=1 SV=1		21.9746	46.0581	7	10	7	1	241	26.374	4.86	High	31.9226	7
FALSE		Master Protein	Q4FZU2	Keratin, type II cytoskeletal 6A OS=Rattus norvegicus GN=Krt6a PE=1 SV=1		21.4568	13.4058	9	18	4	1	552	59.213	7.94	High	35.0388	9
FALSE		Master Protein	P62161	Calmodulin OS=Rattus norvegicus GN=Calm1 PE=1 SV=2		21.2586	44.2953	4	7	4	1	149	16.827	4.22	High	21.0464	4
FALSE		Master Protein	P06761	78 kDa glucose-regulated protein OS=Rattus norvegicus GN=Hspa5 PE=1 SV=1		21.1712	17.5841	8	8	6	1	654	72.302	5.16	High	23.3495	8
FALSE		Master Protein	P62963	Profilin-1 OS=Rattus norvegicus GN=Pfn1 PE=1 SV=2		20.3877	64.2857	7	8	7	1	140	14.948	8.28	High	20.6265	7
FALSE		Master Protein	P00697	Lysozyme C-1 OS=Rattus norvegicus GN=Lyz1 PE=1 SV=2		20.1696	28.3784	2	4	2	1	148	16.718	9.1	High	18.3251	2
FALSE		Master Protein	P40112	Proteasome subunit beta type-3 OS=Rattus norvegicus GN=Psmb3 PE=1 SV=1		20.1525	35.122	5	7	5	1	205	22.949	6.55	High	22.5755	5
FALSE		Master Protein	P17220	Proteasome subunit alpha type-2 OS=Rattus norvegicus GN=Psma2 PE=1 SV=3		20.0534	30.3419	5	7	5	1	234	25.91	7.43	High	25.0426	5
FALSE		Master Protein	Q6P6T1	Complement C1s subcomponent OS=Rattus norvegicus GN=C1s PE=2 SV=2		19.6431	17.2965	11	11	11	1	688	77.022	4.77	High	20.4665	11
FALSE		Master Protein	Q6IG05	Keratin, type II cytoskeletal 75 OS=Rattus norvegicus GN=Krt75 PE=3 SV=2		19.6155	12.9151	9	17	1	1	542	58.991	8.07	High	32.6391	9
FALSE		Master Protein	P70645	Bleomycin hydrolase OS=Rattus norvegicus GN=Blmh PE=1 SV=1		19.4727	24.6696	7	7	7	1	454	52.289	6.48	High	19.7734	7
FALSE		Master Protein	Q68FS4	Cytosol aminopeptidase OS=Rattus norvegicus GN=Lap3 PE=1 SV=1		19.4088	28.3237	10	12	10	1	519	56.115	7.21	High	21.8524	10
FALSE		Master Protein	P04797	Glyceraldehyde-3-phosphate dehydrogenase OS=Rattus norvegicus GN=Gapdh PE=1 SV=3		19.3992	18.9189	4	7	4	1	333	35.805	8.03	High	21.588	4
FALSE		Master Protein	P48004	Proteasome subunit alpha type-7 OS=Rattus norvegicus GN=Psma7 PE=1 SV=1		19.3972	47.2441	10	10	10	1	254	28.309	8.68	High	21.8185	10
FALSE		Master Protein	P18420	Proteasome subunit alpha type-1 OS=Rattus norvegicus GN=Psma1 PE=1 SV=2		19.3659	32.6996	6	8	6	1	263	29.499	6.61	High	25.9582	6
FALSE		Master Protein	P85108	Tubulin beta-2A chain OS=Rattus norvegicus GN=Tubb2a PE=1 SV=1		18.7973	24.2697	6	8	6	1	445	49.875	4.89	High	22.6939	6
FALSE		Master Protein	Q10758	Keratin, type II cytoskeletal 8 OS=Rattus norvegicus GN=Krt8 PE=1 SV=3		18.7115	9.52381	6	13	2	1	483	53.985	6	High	31.4639	6
FALSE		Master Protein	P04785	Protein disulfide-isomerase OS=Rattus norvegicus GN=P4hb PE=1 SV=2		18.2432	20.0393	8	9	8	1	509	56.916	4.93	High	13.1009	8
FALSE		Master Protein	P28075	Proteasome subunit beta type-5 OS=Rattus norvegicus GN=Psmb5 PE=1 SV=3		18.1497	33.0798	6	8	6	1	263	28.567	7.02	High	19.5752	6
FALSE		Master Protein	P31000	Vimentin OS=Rattus norvegicus GN=Vim PE=1 SV=2		18.0878	18.6695	8	9	8	1	466	53.7	5.12	High	20.7048	8
FALSE		Master Protein	P02770	Serum albumin OS=Rattus norvegicus GN=Alb PE=1 SV=2		18.0244	9.04605	5	9	5	1	608	68.686	6.48	High	23.7159	5
FALSE		Master Protein	P12346	Serotransferrin OS=Rattus norvegicus GN=Tf PE=1 SV=3		17.9476	9.74212	7	8	7	1	698	76.346	7.28	High	21.6819	7
FALSE		Master Protein	P18422	Proteasome subunit alpha type-3 OS=Rattus norvegicus GN=Psma3 PE=1 SV=3		17.8473	22.7451	6	9	6	1	255	28.401	5.44	High	17.46	6
FALSE		Master Protein	P11980	Pyruvate kinase PKM OS=Rattus norvegicus GN=Pkm PE=1 SV=3		17.8216	19.774	7	7	7	1	531	57.781	7.06	High	20.8375	7
FALSE		Master Protein	P16975	SPARC OS=Rattus norvegicus GN=Sparc PE=1 SV=4		17.7702	27.2425	8	9	8	1	301	34.274	4.89	High	20.0691	8
FALSE		Master Protein	P13941	Collagen alpha-1(III) chain OS=Rattus norvegicus GN=Col3a1 PE=2 SV=3		17.593	8.74915	8	8	8	1	1463	138.851	6.52	High	21.0213	8
FALSE		Master Protein	P51886	Lumican OS=Rattus norvegicus GN=Lum PE=1 SV=1		17.3867	23.3728	7	8	7	1	338	38.255	6.43	High	21.3651	7
FALSE		Master Protein	P05371	Clusterin OS=Rattus norvegicus GN=Clu PE=1 SV=2		16.6727	15.4362	5	7	5	1	447	51.342	5.71	High	19.5763	5
FALSE		Master Protein	P05197	Elongation factor 2 OS=Rattus norvegicus GN=Eef2 PE=1 SV=4		16.2824	13.0536	8	8	8	1	858	95.223	6.83	High	19.8178	8
FALSE		Master Protein	P31721	Complement C1q subcomponent subunit B OS=Rattus norvegicus GN=C1qb PE=1 SV=2		15.7682	27.2727	5	6	5	1	253	26.573	9	High	16.2055	5
FALSE		Master Protein	P18292	Prothrombin OS=Rattus norvegicus GN=F2 PE=1 SV=1		15.6751	6.48298	4	6	4	1	617	70.367	6.71	High	14.434	4
FALSE		Master Protein	Q6IG02	Keratin, type II cytoskeletal 2 epidermal OS=Rattus norvegicus GN=Krt2 PE=3 SV=1		15.0384	7.59124	6	11	3	1	685	69.085	7.69	High	19.697	6
FALSE		Master Protein	P34067	Proteasome subunit beta type-4 OS=Rattus norvegicus GN=Psmb4 PE=1 SV=2		14.9513	40.3042	7	8	7	1	263	29.178	6.92	High	22.7463	7
FALSE		Master Protein	Q68FP1	Gelsolin OS=Rattus norvegicus GN=Gsn PE=1 SV=1		14.9238	8.84615	5	6	5	1	780	86.014	6.09	High	15.081	5
FALSE		Master Protein	Q9QZA2	Programmed cell death 6-interacting protein OS=Rattus norvegicus GN=Pdcd6ip PE=1 SV=2		14.9035	9.50745	6	7	6	1	873	96.57	6.52	High	13.5277	6
FALSE		Master Protein	P08649	Complement C4 OS=Rattus norvegicus GN=C4 PE=1 SV=3		14.6618	3.85723	7	7	7	1	1737	192.042	7.33	High	18.4751	7
FALSE		Master Protein	Q63416	Inter-alpha-trypsin inhibitor heavy chain H3 OS=Rattus norvegicus GN=Itih3 PE=2 SV=1		14.446	7.66629	7	9	7	1	887	99.036	6.25	High	16.9131	7
FALSE		Master Protein	P07895	Superoxide dismutase [Mn], mitochondrial OS=Rattus norvegicus GN=Sod2 PE=1 SV=2		14.3437	17.1171	4	6	4	1	222	24.659	8.81	High	13.6783	4
FALSE		Master Protein	P30120	Metalloproteinase inhibitor 1 OS=Rattus norvegicus GN=Timp1 PE=1 SV=2		14.3097	23.9631	4	5	4	1	217	23.778	8.09	High	13.5113	4
FALSE		Master Protein	Q5I0D7	Xaa-Pro dipeptidase OS=Rattus norvegicus GN=Pepd PE=2 SV=1		14.0971	18.4959	6	6	6	1	492	54.715	5.95	High	12.2339	6
FALSE		Master Protein	P16617	Phosphoglycerate kinase 1 OS=Rattus norvegicus GN=Pgk1 PE=1 SV=2		14.0827	11.9904	3	5	3	1	417	44.51	7.9	High	14.5113	3
FALSE		Master Protein	P80067	Dipeptidyl peptidase 1 OS=Rattus norvegicus GN=Ctsc PE=1 SV=3		13.7845	20.9957	6	6	6	1	462	52.202	6.89	High	14.684	6
FALSE		Master Protein	Q07936	Annexin A2 OS=Rattus norvegicus GN=Anxa2 PE=1 SV=2		13.7205	19.764	5	5	5	1	339	38.654	7.69	High	14.4901	5
FALSE		Master Protein	B0BNA5	Coactosin-like protein OS=Rattus norvegicus GN=Cotl1 PE=1 SV=1		13.6438	61.2676	7	8	7	1	142	15.922	5.4	High	19.4674	7
FALSE		Master Protein	Q9EPB1	Dipeptidyl peptidase 2 OS=Rattus norvegicus GN=Dpp7 PE=1 SV=1		13.5996	20.6	7	8	7	1	500	55.079	5.05	High	16.3998	7
FALSE		Master Protein	P45592	Cofilin-1 OS=Rattus norvegicus GN=Cfl1 PE=1 SV=3		13.3222	37.3494	4	4	4	1	166	18.521	8.09	High	11.8559	4
FALSE		Master Protein	Q9R0J8	Legumain OS=Rattus norvegicus GN=Lgmn PE=1 SV=1		13.2547	10.1149	3	4	3	1	435	49.434	6.58	High	15.3869	3
FALSE		Master Protein	P18421	Proteasome subunit beta type-1 OS=Rattus norvegicus GN=Psmb1 PE=1 SV=3		13.2338	26.6667	5	6	5	1	240	26.462	7.36	High	13.7273	5
FALSE		Master Protein	P40307	Proteasome subunit beta type-2 OS=Rattus norvegicus GN=Psmb2 PE=1 SV=1		13.099	43.7811	8	8	8	1	201	22.898	7.44	High	12.4261	8
FALSE		Master Protein	Q00715	Histone H2B type 1 OS=Rattus norvegicus PE=1 SV=2		12.5452	20	2	5	2	1	125	13.982	10.36	High	16.0405	2
FALSE		Master Protein	P30348	C-X-C motif chemokine 2 OS=Rattus norvegicus GN=Cxcl2 PE=1 SV=1		12.4727	49	3	4	3	1	100	10.776	8.54	High	15.4125	3
FALSE		Master Protein	Q4KM35	Proteasome subunit beta type-10 OS=Rattus norvegicus GN=Psmb10 PE=2 SV=1		12.2274	16.4835	3	4	3	1	273	29.02	6.64	High	12.9056	3
FALSE		Master Protein	Q6IMF3	Keratin, type II cytoskeletal 1 OS=Rattus norvegicus GN=Krt1 PE=2 SV=1		12.12	8.48	6	10	5	1	625	64.791	7.87	High	25.6533	6
FALSE		Master Protein	Q62632	Follistatin-related protein 1 OS=Rattus norvegicus GN=Fstl1 PE=1 SV=1		12.0688	19.9346	5	8	5	1	306	34.6	5.99	High	8.93413	5
FALSE		Master Protein	P07151	Beta-2-microglobulin OS=Rattus norvegicus GN=B2m PE=1 SV=1		12.0449	19.3277	3	6	3	1	119	13.711	8	High	16.5227	3
FALSE		Master Protein	P31722	Complement C1q subcomponent subunit C OS=Rattus norvegicus GN=C1qc PE=1 SV=2		12.017	25.3061	5	6	5	1	245	25.67	8.32	High	13.7387	5
FALSE		Master Protein	O88989	Malate dehydrogenase, cytoplasmic OS=Rattus norvegicus GN=Mdh1 PE=1 SV=3		12.0047	11.976	3	3	3	1	334	36.46	6.58	High	10.0022	3
FALSE		Master Protein	B5DFC9	Nidogen-2 OS=Rattus norvegicus GN=Nid2 PE=2 SV=1		11.8907	4.58453	5	5	5	1	1396	152.88	5.47	High	13.7482	5
FALSE		Master Protein	P21670	Proteasome subunit alpha type-4 OS=Rattus norvegicus GN=Psma4 PE=1 SV=1		11.864	24.9042	5	5	5	1	261	29.479	7.72	High	13.0318	5
FALSE		Master Protein	P62260	14-3-3 protein epsilon OS=Rattus norvegicus GN=Ywhae PE=1 SV=1		11.8156	22.7451	5	6	4	1	255	29.155	4.74	High	15.0666	5
FALSE		Master Protein	P20961	Plasminogen activator inhibitor 1 OS=Rattus norvegicus GN=Serpine1 PE=2 SV=1		11.7343	15.1741	6	6	6	1	402	44.981	6.64	High	12.5329	6
FALSE		Master Protein	P31044	Phosphatidylethanolamine-binding protein 1 OS=Rattus norvegicus GN=Pebp1 PE=1 SV=3		11.618	25.1337	3	3	3	1	187	20.788	5.8	High	11.0625	3
FALSE		Master Protein	P19804	Nucleoside diphosphate kinase B OS=Rattus norvegicus GN=Nme2 PE=1 SV=1		11.5791	38.1579	4	6	1	1	152	17.272	7.44	High	11.5887	4
FALSE		Master Protein	Q62812	Myosin-9 OS=Rattus norvegicus GN=Myh9 PE=1 SV=3		11.3452	3.97756	5	5	5	1	1961	226.197	5.6	High	9.68718	5
FALSE		Master Protein	P50137	Transketolase OS=Rattus norvegicus GN=Tkt PE=1 SV=1		11.3019	9.14928	4	5	4	1	623	67.601	7.49	High	14.5162	4
FALSE		Master Protein	P31720	Complement C1q subcomponent subunit A OS=Rattus norvegicus GN=C1qa PE=1 SV=2		11.121	21.6327	4	4	4	1	245	25.901	8.97	High	14.2111	4
FALSE		Master Protein	P68255	14-3-3 protein theta OS=Rattus norvegicus GN=Ywhaq PE=1 SV=1		11.0122	14.6939	3	5	2	1	245	27.761	4.78	High	12.6304	3
FALSE		Master Protein	P42123	L-lactate dehydrogenase B chain OS=Rattus norvegicus GN=Ldhb PE=1 SV=2		10.9372	16.1677	5	5	4	1	334	36.589	6.05	High	7.70612	5
FALSE		Master Protein	P50399	Rab GDP dissociation inhibitor beta OS=Rattus norvegicus GN=Gdi2 PE=1 SV=2		10.6798	19.3258	7	7	7	1	445	50.505	6.25	High	14.1901	7
FALSE		Master Protein	Q9JI92	Syntenin-1 OS=Rattus norvegicus GN=Sdcbp PE=1 SV=1		10.6492	13.3333	3	4	3	1	300	32.403	7.49	High	12.159	3
FALSE		Master Protein	Q9R1T3	Cathepsin Z OS=Rattus norvegicus GN=Ctsz PE=1 SV=2		10.5692	22.549	6	6	6	1	306	34.172	7.15	High	14.9947	6
FALSE		Master Protein	Q62745	CD81 antigen OS=Rattus norvegicus GN=Cd81 PE=1 SV=1		10.2919	18.6441	3	4	3	1	236	25.871	5.52	High	12.5243	3
FALSE		Master Protein	Q9QXY8	C-C motif chemokine 7 OS=Rattus norvegicus GN=Ccl7 PE=3 SV=1		10.1259	23.7113	2	6	2	1	97	10.899	9.33	High	6.29092	2
FALSE		Master Protein	Q02765	Cathepsin S OS=Rattus norvegicus GN=Ctss PE=2 SV=1		10.1117	15.1515	3	3	3	1	330	36.809	6.09	High	10.3444	3
FALSE		Master Protein	P11598	Protein disulfide-isomerase A3 OS=Rattus norvegicus GN=Pdia3 PE=1 SV=2		9.91956	11.2871	5	5	5	1	505	56.588	6.21	High	7.7625	5
FALSE		Master Protein	O08628	Procollagen C-endopeptidase enhancer 1 OS=Rattus norvegicus GN=Pcolce PE=1 SV=1		9.90562	11.1111	3	3	3	1	468	50.153	8.06	High	11.0099	3
FALSE		Master Protein	P18418	Calreticulin OS=Rattus norvegicus GN=Calr PE=1 SV=1		9.83778	14.1827	4	4	4	1	416	47.966	4.49	High	12.5592	4
FALSE		Master Protein	P10111	Peptidyl-prolyl cis-trans isomerase A OS=Rattus norvegicus GN=Ppia PE=1 SV=2		9.67622	35.9756	4	4	4	1	164	17.863	8.16	High	12.0652	4
FALSE		Master Protein	P25086	Interleukin-1 receptor antagonist protein OS=Rattus norvegicus GN=Il1rn PE=2 SV=1		9.47448	26.4045	4	5	4	1	178	20.269	6.89	High	11.4273	4
FALSE		Master Protein	P07632	Superoxide dismutase [Cu-Zn] OS=Rattus norvegicus GN=Sod1 PE=1 SV=2		9.19841	24.6753	3	4	3	1	154	15.902	6.35	High	11.0643	3
FALSE		Master Protein	P24368	Peptidyl-prolyl cis-trans isomerase B OS=Rattus norvegicus GN=Ppib PE=1 SV=3		9.17933	19.9074	4	4	4	1	216	23.788	9.5	High	8.65787	4
FALSE		Master Protein	P04636	Malate dehydrogenase, mitochondrial OS=Rattus norvegicus GN=Mdh2 PE=1 SV=2		9.13329	18.6391	5	5	5	1	338	35.661	8.68	High	11.9957	5
FALSE		Master Protein	P07335	Creatine kinase B-type OS=Rattus norvegicus GN=Ckb PE=1 SV=2		9.00704	11.0236	3	3	3	1	381	42.698	5.67	High	8.62629	3
FALSE		Master Protein	Q6AYC4	Macrophage-capping protein OS=Rattus norvegicus GN=Capg PE=1 SV=1		8.71394	11.1748	3	4	3	1	349	38.775	6.55	High	11.4094	3
FALSE		Master Protein	P25113	Phosphoglycerate mutase 1 OS=Rattus norvegicus GN=Pgam1 PE=1 SV=4		8.6458	39.7638	6	6	6	1	254	28.814	7.18	High	13.3799	6
FALSE		Master Protein	P06866	Haptoglobin OS=Rattus norvegicus GN=Hp PE=1 SV=3		8.64298	14.4092	4	4	4	1	347	38.539	6.54	High	10.6225	4
FALSE		Master Protein	P08460	Nidogen-1 (Fragment) OS=Rattus norvegicus GN=Nid1 PE=1 SV=2		8.61131	11.7284	2	2	2	1	324	35.639	4.74	High	7.81013	2
FALSE		Master Protein	P62804	Histone H4 OS=Rattus norvegicus GN=Hist1h4b PE=1 SV=2		8.49615	40.7767	4	4	4	1	103	11.36	11.36	High	9.65446	4
FALSE		Master Protein	P09495	Tropomyosin alpha-4 chain OS=Rattus norvegicus GN=Tpm4 PE=1 SV=3		8.43994	10.0806	2	4	2	1	248	28.492	4.69	High	12.1012	2
FALSE		Master Protein	Q63083	Nucleobindin-1 OS=Rattus norvegicus GN=Nucb1 PE=1 SV=1		8.34744	7.40741	3	3	3	1	459	53.474	5.12	High	8.33484	3
FALSE		Master Protein	P35704	Peroxiredoxin-2 OS=Rattus norvegicus GN=Prdx2 PE=1 SV=3		8.33606	23.7374	4	4	4	1	198	21.77	5.59	High	5.5269	4
FALSE		Master Protein	P51635	Alcohol dehydrogenase [NADP(+)] OS=Rattus norvegicus GN=Akr1a1 PE=1 SV=2		8.30329	20	5	5	5	1	325	36.483	7.31	High	12.7476	5
FALSE		Master Protein	Q5XI73	Rho GDP-dissociation inhibitor 1 OS=Rattus norvegicus GN=Arhgdia PE=1 SV=1		8.10232	20.098	2	2	2	1	204	23.393	5.2	High	7.89491	2
FALSE		Master Protein	P20607	Interleukin-6 OS=Rattus norvegicus GN=Il6 PE=2 SV=1		8.07608	25.1185	5	5	5	1	211	24.342	8.05	High	8.95751	5
FALSE		Master Protein	Q63313	Lipopolysaccharide-binding protein OS=Rattus norvegicus GN=Lbp PE=2 SV=1		8.0291	11.2266	4	4	4	1	481	53.566	8.91	High	8.80382	4
FALSE		Master Protein	Q641Z7	Acid sphingomyelinase-like phosphodiesterase 3a OS=Rattus norvegicus GN=Smpdl3a PE=2 SV=1		7.97678	12.1348	3	3	3	1	445	49.864	6.28	High	9.88887	3
FALSE		Master Protein	Q4QQW8	Putative phospholipase B-like 2 OS=Rattus norvegicus GN=Plbd2 PE=1 SV=2		7.95923	8.37607	4	4	4	1	585	65.414	6.7	High	5.95398	4
FALSE		Master Protein	P85968	6-phosphogluconate dehydrogenase, decarboxylating OS=Rattus norvegicus GN=Pgd PE=1 SV=1		7.95559	8.28157	3	3	3	1	483	53.202	7.02	High	8.28595	3
FALSE		Master Protein	P61983	14-3-3 protein gamma OS=Rattus norvegicus GN=Ywhag PE=1 SV=2		7.88156	15.7895	3	4	2	1	247	28.285	4.89	High	10.0635	3
FALSE		Master Protein	Q05982	Nucleoside diphosphate kinase A OS=Rattus norvegicus GN=Nme1 PE=1 SV=1		7.84372	38.1579	4	5	1	1	152	17.182	6.33	High	10.4512	4
FALSE		Master Protein	Q63610	Tropomyosin alpha-3 chain OS=Rattus norvegicus GN=Tpm3 PE=1 SV=2		7.75958	10.4839	2	2	2	1	248	28.989	4.78	High	6.6208	2
FALSE		Master Protein	P14095	Growth-regulated alpha protein OS=Rattus norvegicus GN=Cxcl1 PE=1 SV=2		7.67833	45.8333	3	4	3	1	96	10.242	9.19	High	10.7711	3
FALSE		Master Protein	Q9R0D6	Transcobalamin-2 OS=Rattus norvegicus GN=Tcn2 PE=2 SV=1		7.59286	16.3934	6	6	6	1	427	47.39	7.74	High	10.2778	6
FALSE		Master Protein	P33436	72 kDa type IV collagenase OS=Rattus norvegicus GN=Mmp2 PE=1 SV=2		7.53935	7.85498	3	3	3	1	662	74.102	5.47	High	3.38097	3
FALSE		Master Protein	P35444	Cartilage oligomeric matrix protein OS=Rattus norvegicus GN=Comp PE=1 SV=1		7.51973	3.97351	2	2	2	1	755	82.611	4.73	High	6.67521	2
FALSE		Master Protein	P0DMW1	Heat shock 70 kDa protein 1B OS=Rattus norvegicus GN=Hspa1b PE=2 SV=1		7.41775	5.14821	3	3	1	1	641	70.142	5.82	High	6.55674	3
FALSE		Master Protein	Q01177	Plasminogen OS=Rattus norvegicus GN=Plg PE=2 SV=2		7.32323	4.06404	3	3	3	1	812	90.477	7.08	High	5.75499	3
FALSE		Master Protein	P10860	Glutamate dehydrogenase 1, mitochondrial OS=Rattus norvegicus GN=Glud1 PE=1 SV=2		7.28947	9.319	4	4	4	1	558	61.377	8	High	10.2315	4
FALSE		Master Protein	Q99376	Transferrin receptor protein 1 (Fragment) OS=Rattus norvegicus GN=Tfrc PE=2 SV=1		7.0446	5.78778	4	4	4	1	622	70.109	6.61	High	6.45629	4
FALSE		Master Protein	Q32KJ6	N-acetylgalactosamine-6-sulfatase OS=Rattus norvegicus GN=Galns PE=1 SV=1		6.98816	11.2595	5	5	5	1	524	58.265	7.01	High	8.4845	5
FALSE		Master Protein	P06302	Prothymosin alpha OS=Rattus norvegicus GN=Ptma PE=1 SV=2		6.92719	13.3929	2	2	2	1	112	12.375	3.84	High	6.27706	2
FALSE		Master Protein	P68511	14-3-3 protein eta OS=Rattus norvegicus GN=Ywhah PE=1 SV=2		6.77797	9.7561	2	3	1	1	246	28.194	4.89	High	7.83465	2
FALSE		Master Protein	Q4V7C7	Actin-related protein 3 OS=Rattus norvegicus GN=Actr3 PE=1 SV=1		6.69579	7.17703	3	3	3	1	418	47.327	5.88	High	4.78405	3
FALSE		Master Protein	P85972	Vinculin OS=Rattus norvegicus GN=Vcl PE=1 SV=1		6.57818	3.09568	2	2	2	1	1066	116.542	6.09	High	6.12656	2
FALSE		Master Protein	P62982	Ubiquitin-40S ribosomal protein S27a OS=Rattus norvegicus GN=Rps27a PE=1 SV=2		6.40481	19.8718	3	3	3	1	156	17.939	9.64	High	8.15637	3
FALSE		Master Protein	Q63716	Peroxiredoxin-1 OS=Rattus norvegicus GN=Prdx1 PE=1 SV=1		6.39964	28.1407	4	5	4	1	199	22.095	8.13	High	10.7733	4
FALSE		Master Protein	Q3MIE4	Synaptic vesicle membrane protein VAT-1 homolog OS=Rattus norvegicus GN=Vat1 PE=1 SV=1		6.38682	15.8416	4	4	4	1	404	43.091	6.62	High	10.5503	4
FALSE		Master Protein	Q6P7S1	Acid ceramidase OS=Rattus norvegicus GN=Asah1 PE=2 SV=1		6.26268	7.36041	2	2	2	1	394	44.415	8.31	High	5.58831	2
FALSE		Master Protein	Q9R063	Peroxiredoxin-5, mitochondrial OS=Rattus norvegicus GN=Prdx5 PE=1 SV=1		6.02479	14.0845	2	2	2	1	213	22.165	8.66	High	5.39206	2
FALSE		Master Protein	Q66HD0	Endoplasmin OS=Rattus norvegicus GN=Hsp90b1 PE=1 SV=2		5.97827	3.60697	3	3	2	1	804	92.713	4.81	High	6.65417	3
FALSE		Master Protein	P16391	RT1 class I histocompatibility antigen, AA alpha chain OS=Rattus norvegicus PE=1 SV=2		5.88414	6.19946	2	2	2	1	371	41.804	5.44	High	5.94359	2
FALSE		Master Protein	Q641X3	Beta-hexosaminidase subunit alpha OS=Rattus norvegicus GN=Hexa PE=2 SV=1		5.84436	7.00758	4	4	3	1	528	60.499	7.24	High	4.59411	4
FALSE		Master Protein	O89049	Thioredoxin reductase 1, cytoplasmic OS=Rattus norvegicus GN=Txnrd1 PE=1 SV=5		5.78232	9.81964	3	3	3	1	499	54.637	6.47	High	9.30913	3
FALSE		Master Protein	Q10746	C-X-C motif chemokine 3 OS=Rattus norvegicus GN=Cxcl3 PE=1 SV=2		5.73164	40.5941	2	4	2	1	101	11.102	9.17	High	11.9628	2
FALSE		Master Protein	Q7TMA5	Apolipoprotein B-100 OS=Rattus norvegicus GN=Apob PE=1 SV=1		5.52835	0.780097	4	4	4	1	4743	535.688	7.42	High	4.14716	4
FALSE		Master Protein	P20059	Hemopexin OS=Rattus norvegicus GN=Hpx PE=1 SV=3		5.51858	5.21739	3	5	3	1	460	51.318	7.65	High	6.87319	3
FALSE		Master Protein	P34901	Syndecan-4 OS=Rattus norvegicus GN=Sdc4 PE=1 SV=1		5.49505	11.8812	2	2	2	1	202	21.948	4.39	High	6.36062	2
FALSE		Master Protein	D3ZHA0	Filamin-C OS=Rattus norvegicus GN=Flnc PE=1 SV=1		5.4608	1.06383	3	3	3	1	2726	290.804	5.9	High	5.4877	3
FALSE		Master Protein	P28064	Proteasome subunit beta type-8 OS=Rattus norvegicus GN=Psmb8 PE=1 SV=3		5.33649	9.05797	2	2	2	1	276	30.55	7.42	High	6.00672	2
FALSE		Master Protein	Q6Q0N1	Cytosolic non-specific dipeptidase OS=Rattus norvegicus GN=Cndp2 PE=1 SV=1		5.22193	6.10526	2	2	2	1	475	52.66	5.66	High	5.20977	2
FALSE		Master Protein	P47942	Dihydropyrimidinase-related protein 2 OS=Rattus norvegicus GN=Dpysl2 PE=1 SV=1		5.20152	7.69231	3	3	3	1	572	62.239	6.38	High	7.01844	3
FALSE		Master Protein	Q6AXR4	Beta-hexosaminidase subunit beta OS=Rattus norvegicus GN=Hexb PE=2 SV=1		5.16098	6.89013	4	4	3	1	537	61.488	7.94	High	6.30338	4
FALSE		Master Protein	P08699	Galectin-3 OS=Rattus norvegicus GN=Lgals3 PE=1 SV=4		4.95419	10.3053	2	2	2	1	262	27.184	8.57	High	2.63615	2
FALSE		Master Protein	P14841	Cystatin-C OS=Rattus norvegicus GN=Cst3 PE=1 SV=2		4.7756	30	3	3	3	1	140	15.427	9.22	High	2.06344	3
FALSE		Master Protein	Q6B345	Protein S100-A11 OS=Rattus norvegicus GN=S100a11 PE=3 SV=1		4.59231	27.551	2	2	2	1	98	11.057	5.9	High	4.9088	2
FALSE		Master Protein	Q6P7Q4	Lactoylglutathione lyase OS=Rattus norvegicus GN=Glo1 PE=1 SV=3		4.57228	10.3261	2	2	2	1	184	20.806	5.31	High	2.80789	2
FALSE		Master Protein	P30152	Neutrophil gelatinase-associated lipocalin OS=Rattus norvegicus GN=Lcn2 PE=1 SV=2		4.47885	11.1111	2	2	2	1	198	22.461	7.83	High	5.80324	2
FALSE		Master Protein	Q5RKI0	WD repeat-containing protein 1 OS=Rattus norvegicus GN=Wdr1 PE=1 SV=3		4.38241	5.11551	2	2	2	1	606	66.14	6.62	High	5.07541	2
FALSE		Master Protein	P62898	Cytochrome c, somatic OS=Rattus norvegicus GN=Cycs PE=1 SV=2		4.37685	18.0952	2	3	2	1	105	11.598	9.58	High	2.81622	2
FALSE		Master Protein	P08494	Matrix Gla protein OS=Rattus norvegicus GN=Mgp PE=1 SV=2		4.36906	23.301	2	2	2	1	103	12.029	9.14	High	2.96469	2
FALSE		Master Protein	Q6P7C7	Transmembrane glycoprotein NMB OS=Rattus norvegicus GN=Gpnmb PE=2 SV=1		4.29218	3.4965	2	2	2	1	572	63.691	7.11	High	6.22413	2
FALSE		Master Protein	Q5XFX0	Transgelin-2 OS=Rattus norvegicus GN=Tagln2 PE=1 SV=1		4.2789	22.1106	3	3	3	1	199	22.379	8.25	High	3.67599	3
FALSE		Master Protein	Q810F4	Protein FAM3C OS=Rattus norvegicus GN=Fam3c PE=2 SV=1		4.25164	9.2511	2	2	2	1	227	24.698	8.29	High	3.00467	2
FALSE		Master Protein	Q64119	Myosin light polypeptide 6 OS=Rattus norvegicus GN=Myl6 PE=1 SV=3		4.22364	13.9073	2	2	2	1	151	16.964	4.55	High	4.44594	2
FALSE		Master Protein	Q63041	Alpha-1-macroglobulin OS=Rattus norvegicus GN=A1m PE=1 SV=1		4.08813	1.33333	2	2	2	1	1500	167.019	6.9	High	5.33394	2
FALSE		Master Protein	Q63945	Protein SET OS=Rattus norvegicus GN=Set PE=2 SV=2		4.08287	10.0346	2	2	2	1	289	33.386	4.32	High	4.05244	2
FALSE		Master Protein	P14844	C-C motif chemokine 2 OS=Rattus norvegicus GN=Ccl2 PE=2 SV=1		3.98632	14.1892	2	2	2	1	148	16.449	9	High	2.45815	2
FALSE		Master Protein	P07483	Fatty acid-binding protein, heart OS=Rattus norvegicus GN=Fabp3 PE=1 SV=2		3.93385	17.2932	2	2	2	1	133	14.766	6.33	High	4.35402	2
FALSE		Master Protein	P46462	Transitional endoplasmic reticulum ATPase OS=Rattus norvegicus GN=Vcp PE=1 SV=3		3.93339	2.72953	2	2	2	1	806	89.293	5.26	High	2.74218	2
FALSE		Master Protein	Q08163	Adenylyl cyclase-associated protein 1 OS=Rattus norvegicus GN=Cap1 PE=1 SV=3		3.8607	4.64135	2	2	2	1	474	51.556	7.52	High	4.61581	2
FALSE		Master Protein	P04762	Catalase OS=Rattus norvegicus GN=Cat PE=1 SV=3		3.71175	5.88235	2	2	2	1	527	59.719	7.5	High	5.01173	2
FALSE		Master Protein	P03957	Stromelysin-1 OS=Rattus norvegicus GN=Mmp3 PE=1 SV=1		3.67987	4.84211	3	3	3	1	475	53.394	5.63	High	5.70779	3
FALSE		Master Protein	P85845	Fascin OS=Rattus norvegicus GN=Fscn1 PE=1 SV=2		3.66713	4.0568	2	2	2	1	493	54.457	6.74	High	1.71341	2
FALSE		Master Protein	Q63598	Plastin-3 OS=Rattus norvegicus GN=Pls3 PE=1 SV=2		3.62921	3.1746	2	2	2	1	630	70.635	5.48	High	4.451	2
FALSE		Master Protein	P31232	Transgelin OS=Rattus norvegicus GN=Tagln PE=1 SV=2		3.6234	9.95025	2	2	2	1	201	22.588	8.84	High	3.2255	2
FALSE		Master Protein	Q99PW3	Sialidase-1 OS=Rattus norvegicus GN=Neu1 PE=1 SV=1		3.57214	4.64548	2	2	2	1	409	44.667	6.02	High	4.1973	2
FALSE		Master Protein	P13383	Nucleolin OS=Rattus norvegicus GN=Ncl PE=1 SV=3		3.5613	2.6648	2	2	2	1	713	77.101	4.74	High	4.72109	2
FALSE		Master Protein	P19132	Ferritin heavy chain OS=Rattus norvegicus GN=Fth1 PE=1 SV=3		3.51328	10.989	2	2	2	1	182	21.113	6.3	High	0	2
FALSE		Master Protein	P62630	Elongation factor 1-alpha 1 OS=Rattus norvegicus GN=Eef1a1 PE=2 SV=1		3.4334	7.57576	2	2	2	1	462	50.082	9.01	High	6.9793	2
FALSE		Master Protein	Q9WTV1	Chitinase-3-like protein 1 OS=Rattus norvegicus GN=Chi3l1 PE=2 SV=3		3.3852	6.29921	2	2	2	1	381	42.365	8.78	High	3.94854	2
FALSE		Master Protein	Q9JHW0	Proteasome subunit beta type-7 OS=Rattus norvegicus GN=Psmb7 PE=1 SV=1		3.37288	7.94224	2	2	2	1	277	29.908	7.97	High	3.84916	2
FALSE		Master Protein	P27926	Hexokinase-3 OS=Rattus norvegicus GN=Hk3 PE=2 SV=1		3.32355	3.0303	2	2	2	1	924	100.189	5.48	High	4.76788	2
FALSE		Master Protein	P01946	Hemoglobin subunit alpha-1/2 OS=Rattus norvegicus GN=Hba1 PE=1 SV=3		3.03574	14.7887	2	2	2	1	142	15.319	7.97	High	5.40002	2
FALSE		Master Protein	P70623	Fatty acid-binding protein, adipocyte OS=Rattus norvegicus GN=Fabp4 PE=1 SV=3		2.95522	18.1818	2	2	2	1	132	14.699	7.94	High	2.14547	2
FALSE		Master Protein	P02091	Hemoglobin subunit beta-1 OS=Rattus norvegicus GN=Hbb PE=1 SV=3		2.69403	12.9252	2	2	2	1	147	15.969	8.07	High	4.32527	2
FALSE		Master Protein	P00507	Aspartate aminotransferase, mitochondrial OS=Rattus norvegicus GN=Got2 PE=1 SV=2		2.61031	3.72093	2	2	2	1	430	47.284	9	High	3.62585	2
FALSE		Master Protein	A7VJC2	Heterogeneous nuclear ribonucleoproteins A2/B1 OS=Rattus norvegicus GN=Hnrnpa2b1 PE=1 SV=1		2.51375	8.49858	2	2	2	1	353	37.455	8.95	High	2.20608	2
FALSE		Master Protein	Q64610	Ectonucleotide pyrophosphatase/phosphodiesterase family member 2 OS=Rattus norvegicus GN=Enpp2 PE=1 SV=2		2.33783	4.50958	2	2	2	1	887	101.511	7.52	High	1.81027	2
FALSE		Master Protein	P23593	Apolipoprotein D OS=Rattus norvegicus GN=Apod PE=1 SV=1		1.99662	6.87831	2	2	2	1	189	21.621	5.02	High	0	2
FALSE		Master Protein	P62703	40S ribosomal protein S4, X isoform OS=Rattus norvegicus GN=Rps4x PE=2 SV=2		1.84569	6.08365	2	2	2	1	263	29.579	10.15	High	1.82932	2
