# Supplementary material for: The Brain Origin of Neonatal Microglia Determines the Content of Exosomes and Biological Function
Source: Preprints.org preprint supplement (doi:10.20944/preprints201907.0102.v1), 2019-07-08
Supplement: Supplementary file 17 [file Supplementary data 9.docx]

**Supp Table 2:** Specific protein identified in cortex and spinal cord microglia exsosomes.

(http://www.uniprot.org/mapping/)

| Cortex exosomes proteins and Spinal Cord exosomes proteins | | |
| --- | --- | --- |
| Accession number | Protein names | Gene names |
| E9PSP1 | Phospholipid transfer protein | Pltp |
| F1M983 | Complement factor H | Cfh |
| A0A0G2K4Q4 | ADP-ribosylation factor 3 | Arf3 |
| F1M9V7 | Aminopeptidase | Npepps |
| A0A0G2K0N8 | Uncharacterized protein |  |
| P05370 | Glucose-6-phosphate 1-dehydrogenase | G6pdx |
| P20059 | Hemopexin | Hpx |
| P40112 | Proteasome subunit beta type-3 | Psmb3 |
| Q6AXR4 | Beta-hexosaminidase subunit beta | Hexb |
| Q9JI92 | Syntenin-1 | Sdcbp |
| Q6AYS3 | Carboxypeptidase | Ctsa |
| D3ZQ45 | Desmoglein 1 | Dsg1 |
| P34058 | Heat shock protein HSP 90-beta | Hsp90ab1 |
| P00507 | Aspartate aminotransferase, mitochondrial | Got2 |
| Q4V8H5 | Aspartyl aminopeptidase | Dnpep |
| P24368 | Peptidyl-prolyl cis-trans isomerase B | Ppib |
| G3V928 | LDL receptor-related protein 1 | Lrp1 |
| Q6MG73 | Complement C2 | C2 |
| Q9EPB1 | Dipeptidyl peptidase 2 | Dpp7 |
| B5DF65 | Biliverdin reductase B | Blvrb |
| Q9R063 | Peroxiredoxin-5, mitochondrial | Prdx5 |
| Q6P0K8 | Junction plakoglobin | Jup |
| Q6AYC4 | Macrophage-capping protein | Capg |
| Q6P3V8 | Eukaryotic translation initiation factor 4A1 | Eif4a1 |
| P38652 | Phosphoglucomutase-1 | Pgm1 |
| A0A0G2K9Q9 | Keratin, type I cytoskeletal 17 | Krt17 |
| P45592 | Cofilin-1 | Cfl1 |
| P13383 | Nucleolin | Ncl Nuc |
| O88752 | Epsilon 1 globin | Hbe1 epsilon 1 |
|  |  |  |
| Q6Q0N1 | Cytosolic non-specific dipeptidase | Cndp2 |
| A0A0H2UHM3 | Haptoglobin | Hp |
| Q6P7S1 | Acid ceramidase | Asah1 |
| P06302 | Prothymosin alpha | Ptma |
| P51886 | Lumican | Lum Lcn Ldc |
| Q5RKI0 | WD repeat-containing protein 1 | Wdr1 |
| P09606 | Glutamine synthetase | Glul |
| P31722 | Complement C1q | C1qc |
| P23606 | Protein-glutamine gamma-glutamyltransferase K | Tgm1 |
| P21670 | Proteasome subunit alpha type-4 | Psma4 |
| Q499P2 | Leukotriene A(4) hydrolase | Lta4h |
| D3ZUM4 | Beta-galactosidase | Glb1 |
| Q9QXY8 | C-C motif chemokine 7 | Ccl7 |
| Q4KM35 | Proteasome subunit beta type-10 | Psmb10 |
| Q5M7T7 | Platelet-activating factor acetylhydrolase | Pla2g7 |
| P30121 | Metalloproteinase inhibitor 2 | Timp2 |
| Q63691 | Monocyte differentiation antigen CD14 | Cd14 |
| Q6P6Q2 | Keratin, type II cytoskeletal 5 | Krt5 |
| P07895 | Superoxide dismutase [Mn], mitochondrial | Sod2 |
| A0A0G2JXB1 | Galectin | Lgals3 |
| Q6P734 | Plasma protease C1 inhibitor | Serping1 |
| A0A0G2K0W9 | Proteasome subunit alpha type | Psma7 |
| Q80ZA3 | Alpha-2 antiplasmin | Serpinf1 |
| F7FJQ3 | NPC intracellular cholesterol transporter 2 | Npc2 |
| B2GUZ9 | Fam49b protein | Fam49b |
| C0JPT7 | Filamin A | Flna |
| P25113 | Phosphoglycerate mutase 1 | Pgam1 |
| Q07936 | Annexin A2 | Anxa2 |
| G3V679 | Transferrin receptor protein 1 | Tfrc |
| A0A0H2UHE2 | Interleukin-1 | Il1rn |
| F1LQQ8 | Beta-glucuronidase | Gusb |
| Q6IFW6 | Keratin, type I cytoskeletal 10 | Krt10 |
| Q6IFU9 | Keratin 16 | Krt16 |
| P02650 | Apolipoprotein E | Apoe |
| Q9EQS0 | Transaldolase | Taldo1 |
| P68255 | 14-3-3 protein theta | Ywhaq |
| P85972 | Vinculin | Vcl |
| P70645 | Bleomycin hydrolase | Blmh |
| P02793 | Ferritin light chain 1 | Ftl1 |
| Q7TP05 | Complement factor B | Cfb C2 |
| A7VJC2 | Heterogeneous nuclear ribonucleoproteins A2/B1 | Hnrnpa2b1 |
| A0A0G2K3Z9 | Uncharacterized protein |  |
| P08721 | Osteopontin | Spp1 |
| M0R757 | Elongation factor 1-alpha | LOC100360413 |
| P18420 | Proteasome subunit alpha type-1 | Psma1 |
| A0A096P6L8 | Fibronectin | Fn1 |
| P48500 | Triosephosphate isomerase | Tpi1 |
| F1M8E9 | Lysozyme | Lyz2 |
| P33436 | 72 kDa type IV collagenase | Mmp2 |
| M0R979 | Thrombospondin 1 | Thbs1 |
| P31044 | Phosphatidylethanolamine-binding protein 1 | Pebp1 |
| P34901 | Syndecan-4 | Sdc4 |
| Q6P9V6 | Proteasome subunit alpha type | Psma5 |
| P68035 | Actin, alpha cardiac muscle 1 | Actc1 |
| P05065 | Fructose-bisphosphate aldolase A | Aldoa |
| D3ZYK8 | Matrix metalloproteinase | Mmp9 |
| Q4FZY1 | Cd68 molecule | Cd68 |
| P04906 | Glutathione S-transferase P | Gstp1 |
| B2RYM3 | Inter-alpha trypsin inhibitor | Itih1 |
| D4A1T6 | Complement C1r | C1r |
| P07335 | Creatine kinase B-type | Ckb |
| Q6B345 | Protein S100-A11 | S100a11 |
| Q58NB7 | Retinoic acid receptor responder | Rarres1 |
| P60901 | Proteasome subunit alpha type-6 | Psma6 |
| Q62667 | Major vault protein | Mvp |
| B2GV73 | Actin-related protein 2/3 | Arpc3 |
| P47942 | Dihydropyrimidinase-related protein 2 | Dpysl2 |
| Q7TP84 | Plasminogen | Plg |
| P62963 | Profilin-1 | Pfn1 |
| Q6P7Q4 | Lactoylglutathione lyase | Glo1 |
| P10111 | Peptidyl-prolyl cis-trans isomerase A | Ppia |
| A0A0G2JSH9 | Peroxiredoxin-2 | Prdx2 |
| D3ZFH5 | Inter-alpha-trypsin inhibitor heavy chain 2 | Itih2 |
| O35244 | Peroxiredoxin-6 | Prdx6 |
| P16617 | Phosphoglycerate kinase 1 | Pgk1 |
| F1LRE1 | Glutathione reductase | Gsr |
| Q4QQW8 | Putative phospholipase B-like 2 | Plbd2 |
| D3ZZL3 | N-acetyl-alpha-glucosaminidase | Naglu |
| G3V7N9 | Complement C1q subcomponent subunit B | C1qb |
| A0A0G2JXN9 | Cartilage oligomeric matrix protein | Comp |
| O88989 | Malate dehydrogenase, cytoplasmic | Mdh1 |
| B0BNA5 | Coactosin-like protein | Cotl1 |
| Q5XI38 | Lymphocyte cytosolic protein 1 | Lcp1 |
| G3V8L3 | Lamin A | Lmna |
| Q9JHW0 | Proteasome subunit beta type-7 | Psmb7 |
| P13221 | Aspartate aminotransferase, cytoplasmic | Got1 |
| A0A0G2K013 | Alpha-actinin-4 | Actn4 |
| Q63610 | Tropomyosin alpha-3 chain | Tpm3 |
| P10960 | Prosaposin | Psap |
| P11232 | Thioredoxin | Txn |
| A0A0G2KA34 | Matrix metalloproteinase | Mmp3 |
| Q68FS4 | Cytosol aminopeptidase | Lap3 |
| Q5PPG2 | Legumain | Lgmn |
| F1LQ00 | Collagen type V alpha 2 chain | Col5a2 |
| P07154 | Cathepsin L1 | Ctsl |
| M0R5J4 | Uncharacterized protein |  |
| P14844 | C-C motif chemokine 2 | Ccl2 |
| P60711 | Actin, cytoplasmic 1 | Actb |
| Q6IFV1 | Keratin, type I cytoskeletal 14 | Krt14 |
| P04636 | Malate dehydrogenase, mitochondrial | Mdh2 |
| Q4FZU2 | Keratin, type II cytoskeletal 6A | Krt6a |
| P50399 | Rab GDP dissociation inhibitor beta | Gdi2 |
| Q10746 | C-X-C motif chemokine 3 | Cxcl3 |
| F1LTJ5 | Uncharacterized protein |  |
| D4A2G6 | Thrombospondin 2 | Thbs2 |
| M0RBJ7 | Complement C3 | C3 |
| P0CG51 | Polyubiquitin-B | Ubb |
| Q6MGA6 | Proteasome subunit beta type | Psmb9 |
| Q08163 | Adenylyl cyclase-associated protein 1 | Cap1 |
| A0A096MK30 | Moesin | Msn |
| P47853 | Biglycan | Bgn |
| P0DP30 | Calmodulin-2 | Calm2 |
| P0DP31 | Calmodulin-3 | Calm3 |
| P0DP29 | Calmodulin-1 | Calm1 |
| P12346 | Serotransferrin | Tf |
| Q5M7T5 | Serine | Serpinc1 |
| P04797 | Glyceraldehyde-3-phosphate dehydrogenase | Gapdh |
| P62494 | Ras-related protein Rab-11A | Rab11a |
| A0A0G2JWE1 | Myosin light polypeptide 6 | Myl6 |
| P31720 | Complement C1q | C1qa |
| Q641X3 | Beta-hexosaminidase subunit alpha | Hexa |
| P46462 | Transitional endoplasmic reticulum ATPase | Vcp |
| Q5XIF6 | Tubulin alpha-4A chain | Tuba4a |
| P62804 | Histone H4 | Hist1h4b |
| P19804 | Nucleoside diphosphate kinase B | Nme2 |
| Q5XI73 | Rho GDP-dissociation inhibitor 1 | Arhgdia |
| D3ZT94 | Pentraxin 3 | Ptx3 |
| Q6P7C7 | Transmembrane glycoprotein | Gpnmb |
| W4VSR4 | Nidogen-2 | Nid2 |
| F1M6Z1 | Apolipoprotein B-100 | Apob |
| P40307 | Proteasome subunit beta type-2 | Psmb2 |
| P09495 | Tropomyosin alpha-4 chain | Tpm4 |
| A0A0G2K9A2 | Arp2/3 complex | Arpc2 |
| M0RAM5 | Glutathione peroxidase | Gpx1 |
| Q6P9V1 | Tetraspanin | Cd81 |
| D3ZCH6 | Ribonuclease T2 | Rnaset2 |
| P62260 | 14-3-3 protein epsilon | Ywhae |
| P30152 | Neutrophil gelatinase-associated lipocalin | Lcn2 |
| P13941 | Collagen alpha-1(III) chain | Col3a1 |
| P70623 | Fatty acid-binding protein, adipocyte | Fabp4 |
| G3V8C3 | Vimentin | Vim |
| P06238 | Alpha-2-macroglobulin | A2m |
| P24268 | Cathepsin D | Ctsd |
| P42123 | L-lactate dehydrogenase B chain | Ldhb |
| F1LM84 | Nidogen-1 | Nid1 |
| F7EQ81 | N-acetylglucosamine-6-sulfatase | Gns |
| D3ZD31 | Mannose receptor | Mrc1 |
| G3V836 | Clusterin | Clu |
| D4ACV3 | Histone H2A | Hist2h2ac |
| D3ZQN7 | Laminin subunit beta 1 | Lamb1 |
| G3V8V1 | Granulin | Grn |
| P63102 | 14-3-3 protein zeta/delta | Ywhaz |
| P07632 | Superoxide dismutase | Sod1 |
| P05197 | Elongation factor 2 | Eef2 |
| A0A0G2JST6 | Hexokinase 3 | Hk3 |
| A0A0G2JSL0 | Proteasome subunit beta type | LOC100360846 |
| P63018 | Heat shock cognate | Hspa8 |
| G3V7Q6 | Proteasome subunit beta type | Psmb5 |
| G3V852 | RCG55135 | Tln1 |
| A0A0G2JUB0 | Protein FAM3C | Fam3c |
| Q4V7C7 | Actin | Actr3 |
| P04785 | Protein disulfide-isomerase | P4hb |
| D3ZZR3 | Cathepsin S | Ctss |
| P11598 | Protein disulfide-isomerase A3 | Pdia3 |
| P02454 | Collagen alpha-1(I) chain | Col1a1 |
| P61983 | 14-3-3 protein gamma | Ywhag |
| G3V6C6 | C-X-C motif chemokine | Cxcl1 |
| P04642 | L-lactate dehydrogenase A chain | Ldha |
| Q641Z7 | Acid sphingomyelinase-like phosphodiesterase 3a | Smpdl3a |
| P28064 | Proteasome subunit beta type-8 | Psmb8 |
| Q66HI5 | Ferritin | Fth1 |
| A0A0G2JWX4 | Keratin | Krt2 |
| D3ZBS2 | Inter-alpha-trypsin inhibitor heavy chain H3 | Itih3 |
| Q5I0D1 | Glyoxalase domain-containing protein 4 | Glod4 |
| F1LMW7 | Myristoylated alanine-rich C-kinase substrate | Marcks |
| Q6P6V0 | Glucose-6-phosphate isomerase | Gpi |
| O08628 | Procollagen C-endopeptidase enhancer 1 | Pcolce |
| Q63945 | Protein SET | Set |
| A0A0G2JST3 | Keratin, type II cytoskeletal 1 | Krt1 |
| A0A0G2K1L0 | Tenascin C | Tnc |
| Q5I0D7 | Xaa-Pro dipeptidase (X-Pro dipeptidase) | Pepd |
| Q9R1T3 | Cathepsin Z | Ctsz |
| F1MAA7 | Laminin subunit gamma 1 | Lamc1 |
| D4A133 | ATPase H+-transporting V1 subunit A | Atp6v1a |
| F1M9B2 | Insulin-like growth factor binding protein 7 | Igfbp7 |
| P11980 | Pyruvate kinase PKM | Pkm |
| P15429 | Beta-enolase | Eno3 |
| G3V6D3 | ATP synthase subunit beta | Atp5b |
| G3V843 | Prothrombin | F2 |
| P20607 | Interleukin-6 | Il6 |
| A0A0G2JSH5 | Serum albumin | Alb |
| G3V6K1 | Transcobalamin 2 | Tcn2 |
| D3ZK14 | Tenascin N | Tnn |
| P63029 | Translationally-controlled tumor protein | Tpt1 |
| Q63041 | Alpha-1-macroglobulin | A1m |
| G3V6P7 | Myosin | Myh9 |
| O70513 | Galectin-3-binding protein | Lgals3bp |
| Q9JKB7 | Guanine deaminase | Gda |
| A0A0G2JSV6 | Globin c2 | Hba-a2 |
| P62329 | Thymosin beta-4 | Tmsb4 |
| P06761 | Glucose-regulated protein | Hspa5 |
| P85968 | 6-phosphogluconate dehydrogenase | Pgd |
| Q6IFU7 | Keratin, type I cytoskeletal | Krt42 |
| Q68FP1 | Gelsolin | Gsn |
| P17220 | Proteasome subunit alpha type-2 | Psma2 |
| Q5XFX0 | Transgelin-2 | Tagln2 |
| P07151 | Beta-2-microglobulin | B2m |
| A0A0G2KBC4 | Colony stimulating factor 1 receptor | Csf1r |
| Q3MIE4 | Synaptic vesicle membrane protein VAT-1 homolog | Vat1 |
| P18421 | Proteasome subunit beta type-1 | Psmb1 |
| P82995 | Heat shock protein HSP 90-alpha | Hsp90aa1 |
| P10860 | Glutamate dehydrogenase 1, mitochondrial | Glud1 |
| F1LTF8 | Laminin subunit alpha 4 | Lama4 |
| P16975 | Secreted protein acidic and rich in cysteine | Sparc |
| Q63083 | Nucleobindin-1 | Nucb1 |
| P30348 | C-X-C motif chemokine 2 | Cxcl2 |
| P18418 | Calreticulin | Calr |
| Q62632 | Follistatin-related protein 1 | Fstl1 |
| P68511 | 14-3-3 protein eta | Ywhah |
| P18422 | Proteasome subunit alpha type-3 | Psma3 |
| F1M779 | Clathrin heavy chain | Cltc |
| Q9QZA2 | Programmed cell death 6-interacting protein | Pdcd6ip |
| F1LMV6 | Desmoplakin | Dsp |
| P85973 | Purine nucleoside phosphorylase | Pnp |
| P30120 | Metalloproteinase inhibitor 1 | Timp1 |
| Q6GMN8 | Actn1 protein | Actn1 |
| G3V8U9 | Proteasome subunit beta | Psmb4 |
| M0RCH5 | Glucosamine-6-phosphate isomerase | Gnpda1 |
| Q6IN22 | Cathepsin B | Ctsb |
| A0A0G2KA90 | Desmocollin 1 | Dsc1 |
| P51635 | Alcohol dehydrogenase | Akr1a1 |
| B2GVB9 | Fermitin family member 3 | Fermt3 |
| A0A0G2K5E8 | Collagen | NEWGENE_621351 |
| P80067 | Dipeptidyl peptidase 1 | Ctsc |

| Cortex exosomes proteins | | |
| --- | --- | --- |
| Accession number | Protein names | Gene names |
| Q6MG61 | Chloride intracellular channel protein 1 | Clic1 |
| P55063 | Heat shock protein 1-like | Hspa1l |
| G3V6S2 | Cytoplasmic aconitate hydratase | Aco1 |
| Q10758 | Keratin, type II cytoskeletal 8 | Krt8 |
| F1MAN8 | Laminin subunit alpha 5 | Lama5 |
| Q91ZN1 | Coronin-1A | Coro1a |
| P14480 | Fibrinogen beta chain | Fgb |
| P18484 | AP-2 complex subunit alpha-2 | Ap2a2 |
| P09811 | Glycogen phosphorylase | Pygl |
| P28480 | T-complex protein 1 subunit alpha | Tcp1 |
| Q66H59 | N-acetylneuraminate lyase | Npl |
| F1LRV4 | Heat shock protein 4 | Hspa4 |
| P55053 | Fatty acid-binding protein | Fabp5 |
| Q5XIM9 | T-complex protein 1 subunit beta | Cct2 |
| A0A0G2JSJ8 | Fucosidase | Fuca1 |
| G3V8A5 | Vacuolar protein sorting-associated protein 35 | Vps35 |
| P06762 | Heme oxygenase 1 | Hmox1 |
| A0A0G2K7X0 | Acidic leucine-rich nuclear phosphoprotein | Anp32a |
| Q80WY6 | Tumor necrosis factor receptor superfamily member 1B | Tnfrsf1b |
| P85845 | Fascin | Fscn1 |
| P35281 | Rab-10 | Rab10 |
| Q4FZT9 | 26S proteasome non-ATPase regulatory subunit 2 | Psmd2 |
| D3ZS25 | Similar to High mobility group protein 2 | RGD1561694 |
| P41562 | Isocitrate dehydrogenase [NADP] cytoplasmic | Idh1 |
| G3V7H3 | Complement factor D | Cfd |
| Q5XIC6 | Proteasome | Psmd12 |
| F7EPE0 | Prosaposin | Psap |
| P27605 | Hypoxanthine-guanine phosphoribosyltransferase | Hprt1 |
| Q64268 | Heparin cofactor 2 | Serpind1 |
| B5DFD8 | SH3 domain-binding glutamic acid-rich-like protein | Sh3bgrl |
| O54715 | V-type proton ATPase subunit S1 | Atp6ap1 |
| Q9QZK5 | Serine protease HTRA1 | Htra1 |
| G3V786 | Aldo-keto reductase family 1 member B10 | Akr1b8 |
| Q8CFN2 | Cell division control protein 42 homolog | Cdc42 |
| Q3MHS9 | Chaperonin containing Tcp1 | Cct6a |
| G3V824 | Insulin-like growth factor 2 receptor | Igf2r |
| P05942 | Metastasin | S100a4 |
| Q9EQX9 | Ubiquitin-conjugating enzyme E2 N | Ube2n |
| A0A0G2K7X7 | Complement C7 | C7 |
| Q9QZQ5 | Protein NOV homolog | Nov |
| F8WFR6 | Glycogenin-1 | Gyg1 |
| P63245 | Receptor of activated protein C kinase 1 | Rack1 |
| D4A781 | Importin 5 | Ipo5 |
| D3ZEV0 | Nuclease-sensitive element-binding protein 1-like | Ybx1-ps3 |
| P10760 | Adenosylhomocysteinase | Ahcy |
| G3V8L7 | Integrin alpha M | Itgam |
| A0A0G2K2V2 | AP complex subunit beta | Ap1b1 |
| Q920A6 | Retinoid-inducible serine carboxypeptidase | Scpep1 |
| P84092 | AP-2 complex subunit mu | Ap2m1 |
| A0A096MJ68 | RCG32428, isoform CRA_a | Slpi |
| F1LMS5 | Thrombospondin-4 | Thbs4 |
| P62198 | 26S proteasome regulatory subunit 8 | Psmc5 |
| O55012 | Phosphatidylinositol-binding clathrin assembly protein | Picalm |
| Q6MG90 | Complement C4B | C4b |
| A0A0G2JVV5 | Ubiquitin-specific peptidase 14 | Usp14 |
| B2RYB8 | Integrin beta | Itgb2 |
| Q66H12 | Alpha-N-acetylgalactosaminidase | Naga |
| G3V7Z4 | Glia-derived nexin | Serpine2 |
| P14668 | Annexin A5 | Anxa5 |
| P38983 | 40S ribosomal protein SA | Rpsa |
| P14408 | Fumarate hydratase, mitochondrial | Fh1 |
| P62909 | 40S ribosomal protein S3 | Rps3 |
| B2GUZ5 | F-actin-capping protein subunit alpha-1 | Capza1 |
| Q6P9T8 | Tubulin beta-4B chain | Tubb4b |
| P97536 | Cullin-associated NEDD8-dissociated protein 1 | Cand1 |
| Q7M0E3 | Destrin | Dstn |
| D4A2F1 | Agrin | Agrn |
| Q63569 | 26S proteasome regulatory subunit 6A | Psmc3 |
| Q6IUU3 | Sulfhydryl oxidase 1 | Qsox1 |
| Q5XI34 | Protein phosphatase 2 | Ppp2r1a |
| A0A0G2K3W2 | Coagulation factor V | F5 |
| Q9EQV8 | Carboxypeptidase N catalytic chain | Cpn1 |
| P24090 | Alpha-2-HS-glycoprotein | Ahsg |
| A0A0G2KAJ7 | Collagen alpha-1(XII) chain | Col12a1 |
| Q00715 | Histone H2B type 1 |  |
| Q5M860 | Rho GDP dissociation inhibitor beta | Arhgdib |
| Q9EQV9 | Carboxypeptidase B2 | Cpb2 |
| A0A0G2JUN7 | Thioredoxin reductase 1, cytoplasmic | Txnrd1 |
| D4AC23 | Chaperonin-containing TCP1 subunit 7 | Cct7 |
| B2RZ72 | Actin-related protein 2/3 complex subunit 4 | Arpc4 |
| B5DEN5 | Eukaryotic translation elongation factor 1 beta 2 | Eef1b2 |
| Q6P6G9 | Heterogeneous nuclear ribonucleoprotein A1 | Hnrnpa1 |
| Q6P502 | T-complex protein 1 subunit gamma | Cct3 |
| M0R6K0 | Laminin subunit beta-2 | Lamb2 |
| G3V7Q7 | IQ motif containing GTPase activating protein 1 | Iqgap1 |
| P52296 | Importin subunit beta-1 | Kpnb1 |
| A0A0H2UHL6 | Pro-cathepsin H | Ctsh |
| Q5M7U6 | Actin-related protein 2 | Actr2 |
| Q5EBA7 | HGF activator | Hgfac |
| P11762 | Galectin-1 | Lgals1 |
| G3V6T1 | Coatomer subunit alpha | Copa |
| F1M9B9 | Interleukin-1 receptor accessory protein | Il1rap |
| Q06000 | Lipoprotein lipase | Lpl |
| P29524 | Plasminogen activator inhibitor 2 type A | Serpinb2 |
| D3ZAR3 | Small proline-rich protein 2D | Sprr2d |
| Q91Y81 | Septin-2 | Vesp11 |
| Q68FR6 | Elongation factor 1-gamma | Eef1g |
| Q66HG3 | Beta-Ala-His dipeptidase | Cndp1 |
| P08081 | Clathrin light chain A | Clta |
| Q5FVI6 | V-type proton ATPase subunit C 1 | Atp6v1c1 |
| Q4G061 | Eukaryotic translation initiation factor 3 subunit B | Eif3b |
| Q6P6Q5 | Amyloid-beta A4 protein | App |
| Q32KJ6 | N-acetylgalactosamine-6-sulfatase | Galns |
| A0A0G2K2E1 | RT1 class Ia | RT1-A1 |
| Q8CHN8 | Mannan-binding lectin serine protease 1 | Masp1 |
| Q8R3Z7 | EH-domain-containing 4 | Ehd4 |
| G3V8R1 | Nucleobindin 2, isoform CRA_b | Nucb2 |
| A0A096P6L9 | Complement C5 | C5 |
| P30835 | ATP-dependent 6-phosphofructokinase | Pfkl |
| B2RYP0 | Ras homolog family member C | Rhoc |
| G3V826 | Transketolase | Tkt |
| P07943 | Aldose reductase | Akr1b1 |
| A0A0H2UHL3 | Adipocyte enhancer-binding protein 1 | Aebp1 |
| G3V908 | Type II keratin Kb15 | Kb15 |
| P68370 | Tubulin alpha-1A chain | Tuba1a |
| Q5U2S7 | Proteasome | Psmd3 |
| A0A0G2K1L8 | Brain acid soluble protein 1 | Basp1 |
| Q6P6T1 | Complement C1s subcomponent | C1s |
| P55067 | Neurocan core protein | Ncan |
| F1LXD8 | Elastin microfibril interfacer 2 | Emilin2 |
| D4ACB8 | Chaperonin subunit 8 | Cct8 |
| A0A0G2K1S6 | Malic enzyme | Me1 |
| Q3T1K5 | F-actin-capping protein subunit alpha-2 | Capza2 |
| P53534 | Glycogen phosphorylase | Pygb |
| B2RYP4 | Sorting nexin 2 | Snx2 |
| A0A0G2K542 | UTP--glucose-1-phosphate uridylyltransferase | Ugp2 |
| A0A0G2K8Q5 | Glutathione S-transferase | Gsta3 |
| D3ZWH1 | Stabilin 1 | Stab1 |
| Q63663 | Guanylate-binding protein 1 | Gbp2 |
| D3ZX01 | 40S ribosomal protein S4 | Rps4y2 |
| Q63772 | Growth arrest-specific protein 6 | Gas6 |
| G3V7K3 | Ceruloplasmin | Cp |
| Q5XI32 | F-actin-capping protein subunit beta | Capzb |
| A0A0H2UHT6 | Ribosomal protein S18 | Rps18 |
| D4A1J6 | Ankyrin repeat and FYVE domain-containing 1 | Ankfy1 |
| O35567 | Protein PURH | Atic Purh |
| P05964 | Calcyclin | S100a6 |
| F1LNF0 | Myosin heavy chain 14 | Myh14 |
| Q63081 | Protein disulfide-isomerase A6 | Pdia6 |
| G3V7L6 | 26S proteasome regulatory subunit 7 | Psmc2 |
| P19945 | 60S acidic ribosomal protein | Rplp0 |
| D3ZQ74 | Procollagen-lysine | Plod1 |
| P69897 | Tubulin beta-5 chain | Tubb5 |
| O88656 | Actin-related protein 2/3 complex subunit 1B | Arpc1b |
| Q5Y4N8 | Adhesion G protein-coupled receptor E2 | Adgre1 |
| P14562 | Lysosome-associated membrane glycoprotein 1 | Lamp1 |
| B2RZ27 | SH3 domain binding glutamic acid-rich protein-like 3 | Sh3bgrl3 |
| P14669 | Annexin A3 | Anxa3 |
| Q4KLF8 | Actin-related protein 2/3 complex subunit 5 | Arpc5 |
| G3V624 | Coronin | Coro1c |
| M0R9X8 | Cytoplasmic dynein 1 heavy chain 1 | Dync1h1 |
| P97712 | Colony-stimulating factor 3 | Csf3 |
| Q6IN37 | GM2 ganglioside activator | Gm2a |
| Q6P9V7 | Proteasome | Psme1 |
| P23514 | Coatomer subunit beta | Copb1 |
| P35213 | 14-3-3 protein beta/alpha | Ywhab |
| Q5U300 | Ubiquitin-like modifier-activating enzyme 1 | Uba1 |
| Q5FVN3 | Ccl9-like protein | Ccl9 |
| Q9ERB4 | Versican core protein | Vcan |
| A0A0A0MY09 | Endoplasmin | Hsp90b1 |
| F1LM16 | Plasminogen activator inhibitor 1 | Serpine1 |
| P05982 | NAD(P)H dehydrogenase | Nqo1 |
| B1WC21 | Fibulin-1 | Fbln1 |
| A0A0G2K8F6 | Alpha-mannosidase | Man2b2 |
| P43145 | Adrenomedullin | Adm |

| Spinal Cord exosomes proteins | | |
| --- | --- | --- |
| Accession number | Protein names | Gene names |
| G3V936 | Citrate synthase | Cs |
| Q6P9V9 | Tubulin alpha-1B chain | Tuba1b |
| O88767 | Protein/nucleic acid deglycase DJ-1 | Park7 |
| D3ZQ25 | Fibulin-1 | Fbln1 |
| A0A0G2JZ10 | Sialidase-1 | Neu1 |
| Q9WTV1 | Chitinase-3-like protein 1 | Chi3l1 |
| P19468 | Glutamate--cysteine ligase catalytic subunit | Gclc |
| A0A0G2JW12 | Complement component 4A | C4a |
| P50137 | Transketolase | Tkt |
| P20961 | Plasminogen activator inhibitor 1 | Serpine1 |
| P01041 | Cystatin-B | Cstb |
| Q920P6 | Adenosine deaminase | Ada |
| P20611 | Lysosomal acid phosphatase | Acp2 |
| Q9ERB4 | Versican core protein | Vcan |
| P07323 | Gamma-enolase | Eno2 |
| D3ZQ18 | F-box/G-domain protein 2 | Nccrp1 |
| A0A0G2KAM4 | Fascin | Fscn1 |
| D3ZY51 | Plakophilin 1 | Pkp1 |
| R9PXU4 | Thioredoxin reductase 1 | Txnrd1 |
| P07483 | Fatty acid-binding protein | Fabp3 |
| Q5FVH2 | Phospholipase D3 | Pld3 |
| P50398 | Rab GDP dissociation inhibitor alpha | Gdi1 |
| A0A0G2JT64 | Aldo-keto reductase family 1 member B10 | Akr1b8 |
| A0A0G2K4X1 | RT1 class Ia, locus A1 | RT1-A1 |
| A0A0G2JVA8 | Type II keratin Kb15 | Kb15 |
| P04762 | Catalase | Cat |
| D4A1S0 | Complement C1s subcomponent | C1s |
| Q3MID7 | Lipopolysaccharide-binding protein | Lbp |
| Q6IG01 | Keratin, type II cytoskeletal 1b | Krt77 |
| P14841 | Cystatin-C | Cst3 |
| A0A0G2JZE6 | Receptor of-activated protein C kinase 1 | Rack1 |
| Q5PQK2 | FUS RNA-binding protein | Fus |
| D4A5L9 | Cytochrome c | LOC679794 |
| P80254 | D-dopachrome decarboxylase | Ddt |
| A0A0G2K8K9 | RNA binding motif protein | Rbmxl1b |
| P85108 | Tubulin beta-2A chain | Tubb2a |
| P08494 | Matrix Gla protein | Mgp |
| A0A0G2JSW3 | Globin a4 | Hbb |
| A0A0G2K4H6 | N-acetylgalactosamine-6-sulfatase | Galns |
| Q6IFV4 | Keratin | Krt13 |
| A0A0G2K7R1 | Uncharacterized protein |  |
| Q63797 | Proteasome activator complex subunit 1 | Psme1 |
| A0A0G2K4I4 | Endoplasmin | Hsp90b1 |
| P38659 | Protein disulfide-isomerase A4 | Pdia4 |
| Q6IG05 | Keratin, type II cytoskeletal 75 | Krt75 |
| O55096 | Dipeptidyl peptidase 3 | Dpp3 |
